# Supplementary material for: Three New Escherichia coli Phages from the Human Gut Show Promising Potential for Phage Therapy
Source: PLoS One. 2016 Jun 9;11(6):e0156773. doi: 10.1371/journal.pone.0156773 (PMC4900583; doi:10.1371/journal.pone.0156773)
Supplement: S1 Table — (XLSX) [file pone.0156773.s001.xlsx]

## Sheet: Sheet1
query id	subject ids	% identity	% positives	alignment length	mismatches	gap opens	q. start	q. end	s. start	s. end	evalue	bit score	product
ORF001	gi|725949836|ref|YP_009100572.1|;gi|678223472|gb|AIM50612.1|;gi|815007478|gb|AKE45255.1|;gi|815008017|gb|AKE45791.1|;gi|815009016|gb|AKE46783.1|	99.41	99.71	340	2	0	1	340	1	340	0	705	DNA primase subunit [Shigella phage Shf125875]
ORF001	gi|32453514|ref|NP_861720.1|;gi|32350333|gb|AAP75932.1|	99.41	99.71	340	2	0	1	340	1	340	0	705	DNA primase [Enterobacteria phage RB69]
ORF001	gi|682124307|ref|YP_009056619.1|;gi|604671742|gb|AHV82736.1|	99.12	99.41	340	3	0	1	340	1	340	0	704	primase [Escherichia phage vB_EcoM_PhAPEC2]
ORF001	gi|642905945|ref|YP_009037475.1|;gi|642904099|gb|AIA80119.1|	99.12	99.41	340	3	0	1	340	1	340	0	703	DNA primase [Escherichia phage vB_EcoM_JS09]
ORF001	gi|698040712|gb|AIT73042.1|;gi|698040984|gb|AIT73313.1|;gi|698041256|gb|AIT73584.1|;gi|698041529|gb|AIT73856.1|;gi|698041802|gb|AIT74128.1|	74.26	85.5	338	85	2	4	340	6	342	0	538	DNA primase [Enterobacteria phage RB5]
ORF001	gi|639438684|ref|YP_009030641.1|;gi|628971512|gb|AHY83234.1|	74.26	85.5	338	85	2	4	340	6	342	0	538	DNA primase subunit [Escherichia phage e11/2]
ORF001	gi|587757154|gb|AHK10887.1|	73.96	85.5	338	86	2	4	340	6	342	0	537	putative DNA primase [Escherichia phage HY01]
ORF001	gi|398313577|emb|CCI88924.1|	74.26	85.21	338	85	2	4	340	6	342	0	537	DNA primase / DNA helicase, phage-associated [Yersinia phage phiD1]
ORF001	gi|730984760|ref|YP_009110853.1|;gi|694817473|gb|AIS73355.1|	73.96	85.5	338	86	2	4	340	6	342	0	537	gp46 [Shigella phage pSs-1]
ORF001	gi|414086395|ref|YP_006986584.1|;gi|383396176|gb|AFH19992.1|	73.96	84.91	338	86	2	4	340	6	342	0	536	DNA primase subunit [Enterobacteria phage vB_EcoM_ACG-C40]
ORF002	gi|410492073|ref|YP_006907259.1|;gi|725949835|ref|YP_009100571.1|;gi|407437662|gb|AFU20422.1|;gi|678223471|gb|AIM50611.1|;gi|815007479|gb|AKE45256.1|;gi|815008016|gb|AKE45790.1|;gi|815009015|gb|AKE46782.1|	100	100	65	0	0	1	65	1	65	3e-37	122	hypothetical protein HX01_0150 [Enterobacteria phage HX01]
ORF002	gi|32453513|ref|NP_861719.1|;gi|32350332|gb|AAP75931.1|	98.46	100	65	1	0	1	65	1	65	4e-37	122	RB69ORF029w hypothetical protein [Enterobacteria phage RB69]
ORF002	gi|642905797|ref|YP_009037476.1|;gi|682124306|ref|YP_009056618.1|;gi|604671741|gb|AHV82735.1|;gi|642903951|gb|AIA79971.1|	98.46	100	65	1	0	1	65	1	65	3e-36	120	hypothetical protein JS09_0153 [Escherichia phage vB_EcoM_JS09]
ORF002	gi|116326252|ref|YP_802972.1|;gi|115343845|gb|ABI94854.1|;gi|698042345|gb|AIT74669.1|	55.56	77.78	63	28	0	3	65	4	66	7e-18	73.2	hypothetical protein RB32ORF030w [Enterobacteria phage RB32]
ORF002	gi|729030916|gb|AIZ02668.1|	50.77	78.46	65	32	0	1	65	1	65	1e-17	72.8	hypothetical protein VR26_031 [Enterobacteria phage vB_EcoM_VR26]
ORF002	gi|291290246|dbj|BAI83041.1|	55.56	76.19	63	28	0	3	65	4	66	1e-17	72.4	conserved hypothetical protein [Enterobacteria phage AR1]
ORF002	gi|228861346|ref|YP_002854367.1|;gi|330858557|ref|YP_004414932.1|;gi|227438362|gb|ACP30675.1|;gi|327397491|gb|AEA72993.1|	55.56	76.19	63	28	0	3	65	4	66	2e-17	71.6	RB32ORF030w hypothetical protein [Enterobacteria phage RB14]
ORF002	gi|228860964|ref|YP_002853987.1|;gi|422934814|ref|YP_007004774.1|;gi|713322622|ref|YP_009102237.1|;gi|227438638|gb|ACP30950.1|;gi|343177368|gb|AEM00694.1|;gi|698042074|gb|AIT74399.1|;gi|698043171|gb|AIT75492.1|;gi|815008274|gb|AKE46047.1|	53.97	76.19	63	29	0	3	65	4	66	3e-17	71.6	RB32ORF030w hypothetical protein [Enterobacteria phage RB51]
ORF002	gi|414086394|ref|YP_006986583.1|;gi|383396175|gb|AFH19991.1|	53.97	76.19	63	29	0	3	65	4	66	3e-17	71.2	hypothetical protein ACG-C40_0032 [Enterobacteria phage vB_EcoM_ACG-C40]
ORF002	gi|299780387|gb|ADJ39749.1|;gi|698042622|gb|AIT74945.1|;gi|698042895|gb|AIT75217.1|	53.97	76.19	63	29	0	3	65	4	66	4e-17	71.2	hypothetical protein T4Tp032 [Enterobacteria phage T4T]
ORF003	gi|642905946|ref|YP_009037477.1|;gi|682124305|ref|YP_009056617.1|;gi|604671740|gb|AHV82734.1|;gi|642904100|gb|AIA80120.1|	100	100	173	0	0	1	173	1	173	2e-127	360	dCTP pyrophosphatase [Escherichia phage vB_EcoM_JS09]
ORF003	gi|725949834|ref|YP_009100570.1|;gi|678223470|gb|AIM50610.1|;gi|815007480|gb|AKE45257.1|;gi|815008015|gb|AKE45789.1|;gi|815009014|gb|AKE46781.1|	97.69	97.69	173	4	0	1	173	1	173	7e-124	351	dCTPase [Shigella phage Shf125875]
ORF003	gi|32453512|ref|NP_861718.1|;gi|32350331|gb|AAP75930.1|	97.11	97.69	173	5	0	1	173	1	173	1e-123	350	dCTP pyrophosphatase [Enterobacteria phage RB69]
ORF003	gi|729030059|gb|AIZ01814.1|	91.91	95.95	173	14	0	1	173	1	173	2e-117	335	dCTP pyrophosphatase [Enterobacteria phage vB_EcoM_VR5]
ORF003	gi|299778981|ref|YP_003734175.1|;gi|298105710|gb|ADI55354.1|	90.75	93.06	173	16	0	1	173	6	178	5e-114	326	56 gene product [Enterobacteria phage IME08]
ORF003	gi|161622406|ref|YP_001595154.1|;gi|238695182|ref|YP_002922375.1|;gi|160213712|gb|ABX11051.1|;gi|220029318|gb|ACL78252.1|	88.44	93.64	173	20	0	1	173	1	173	3e-112	321	gp56 dCTPase [Enterobacteria phage JS98]
ORF003	gi|729030621|gb|AIZ02374.1|	86.13	93.06	173	24	0	1	173	1	173	4e-110	316	nucleoside triphosphate pyrophosphohydrolase [Enterobacteria phage vB_EcoM_VR25]
ORF003	gi|408386967|gb|AFU63976.1|	83.82	91.91	173	27	1	1	173	1	172	8e-104	300	hypothetical protein [Salmonella phage STML-198]
ORF003	gi|456351113|ref|YP_007501065.1|;gi|764161822|ref|YP_009126232.1|;gi|347466232|gb|AEO97018.1|;gi|586881459|gb|AHJ86879.1|	83.24	91.91	173	28	1	1	173	1	172	2e-103	299	dCTP pyrophosphatase [Salmonella phage S16]
ORF003	gi|414086391|ref|YP_006986580.1|;gi|383396172|gb|AFH19988.1|	81.5	91.91	173	31	1	1	173	1	172	8e-103	298	dCTPase [Enterobacteria phage vB_EcoM_ACG-C40]
ORF004	gi|228861343|ref|YP_002854364.1|;gi|639438679|ref|YP_009030636.1|;gi|227438359|gb|ACP30672.1|;gi|628971507|gb|AHY83229.1|	96.15	98.72	78	3	0	1	78	1	78	8e-51	158	small outer capsid [Enterobacteria phage RB14]
ORF004	gi|587757151|gb|AHK10884.1|	96.15	97.44	78	3	0	1	78	1	78	1e-50	157	putative small outer capsid protein [Escherichia phage HY01]
ORF004	gi|410492074|ref|YP_006907260.1|;gi|407437663|gb|AFU20423.1|	94.87	96.15	78	4	0	1	78	1	78	7e-50	155	hypothetical protein HX01_0152 [Enterobacteria phage HX01]
ORF004	gi|725949831|ref|YP_009100567.1|;gi|678223467|gb|AIM50607.1|	91.03	96.15	78	7	0	1	78	1	78	1e-48	152	small outer capsid protein [Shigella phage Shf125875]
ORF004	gi|32453511|ref|NP_861717.1|;gi|270346603|pdb|3IG9|A;gi|270346604|pdb|3IG9|B;gi|270346605|pdb|3IG9|C;gi|270346606|pdb|3IG9|D;gi|270346607|pdb|3IGE|A;gi|270346608|pdb|3IGE|B;gi|32350330|gb|AAP75929.1|	89.74	96.15	78	8	0	1	78	1	78	4e-48	151	Soc small outer capsid protein [Enterobacteria phage RB69]
ORF004	gi|422934811|ref|YP_007004771.1|;gi|343177365|gb|AEM00691.1|;gi|815008271|gb|AKE46044.1|	92.31	94.87	78	6	0	1	78	1	78	5e-48	151	small outer capsid protein [Escherichia phage wV7]
ORF004	gi|682124304|ref|YP_009056616.1|;gi|604671739|gb|AHV82733.1|	92.31	93.59	78	6	0	1	78	1	78	7e-48	150	small outer capsid protein [Escherichia phage vB_EcoM_PhAPEC2]
ORF004	gi|642905947|ref|YP_009037478.1|;gi|642904101|gb|AIA80121.1|;gi|815007483|gb|AKE45260.1|;gi|815008012|gb|AKE45786.1|;gi|815009011|gb|AKE46778.1|	91.03	92.31	78	7	0	1	78	1	78	6e-47	148	small outer capsid protein [Escherichia phage vB_EcoM_JS09]
ORF004	gi|730984757|ref|YP_009110850.1|;gi|694817470|gb|AIS73352.1|	88.46	93.59	78	9	0	1	78	1	78	3e-46	146	gp43 [Shigella phage pSs-1]
ORF004	gi|414086389|ref|YP_006986578.1|;gi|383396170|gb|AFH19986.1|	88.46	93.59	78	9	0	1	78	1	78	4e-46	146	small outer capsid protein [Enterobacteria phage vB_EcoM_ACG-C40]
ORF005	gi|725949830|ref|YP_009100566.1|;gi|678223466|gb|AIM50606.1|	98.67	100	75	1	0	1	75	1	75	2e-50	157	hypothetical protein [Shigella phage Shf125875]
ORF005	gi|642905948|ref|YP_009037479.1|;gi|682124303|ref|YP_009056615.1|;gi|604671738|gb|AHV82732.1|;gi|642904102|gb|AIA80122.1|	98.67	98.67	75	1	0	1	75	1	75	5e-50	155	hypothetical protein JS09_0156 [Escherichia phage vB_EcoM_JS09]
ORF005	gi|410492075|ref|YP_006907261.1|;gi|407437664|gb|AFU20424.1|	96	98.67	75	3	0	1	75	1	75	3e-49	154	hypothetical protein HX01_0153 [Enterobacteria phage HX01]
ORF005	gi|32453510|ref|NP_861716.1|;gi|32350329|gb|AAP75928.1|	96.15	100	52	2	0	1	52	1	52	8e-32	108	Mrh.2 conserved hypothetical protein [Enterobacteria phage RB69]
ORF005	gi|422934117|ref|YP_007004153.1|;gi|345450626|gb|AEN93829.1|	73.85	86.15	65	16	1	1	64	1	65	2e-28	100	conserved hypothetical protein [Enterobacteria phage Bp7]
ORF005	gi|308814378|ref|YP_003934652.1|;gi|308205970|gb|ADO19369.1|;gi|729030330|gb|AIZ02084.1|	63.08	75.38	65	23	1	1	64	1	65	5e-22	84.3	hypothetical protein SP18_gp027 [Shigella phage SP18]
ORF005	gi|314121591|ref|YP_004063710.1|;gi|313151348|gb|ADR32404.1|	60	73.85	65	25	1	1	64	1	65	3e-21	82.4	Mrh.2 conserved hypothetical protein [Enterobacteria phage vB_EcoM-VR7]
ORF005	gi|729030912|gb|AIZ02664.1|	58.46	72.31	65	26	1	1	64	1	65	2e-20	80.1	hypothetical protein VR26_027 [Enterobacteria phage vB_EcoM_VR26]
ORF005	gi|729030617|gb|AIZ02370.1|	61.54	76.92	52	19	1	1	51	1	52	1e-16	70.5	hypothetical protein VR25_026 [Enterobacteria phage vB_EcoM_VR25]
ORF005	gi|729030057|gb|AIZ01812.1|	54.93	66.2	71	25	3	1	64	1	71	2e-14	64.3	hypothetical protein VR5_025 [Enterobacteria phage vB_EcoM_VR5]
ORF006	gi|725949829|ref|YP_009100565.1|;gi|678223465|gb|AIM50605.1|	92.68	95.12	82	2	1	1	82	1	78	5e-48	151	hypothetical protein [Shigella phage Shf125875]
ORF006	gi|642905949|ref|YP_009037480.1|;gi|642904103|gb|AIA80123.1|	89.02	93.9	82	5	1	1	82	1	78	2e-26	95.9	hypothetical protein JS09_0157 [Escherichia phage vB_EcoM_JS09]
ORF006	gi|32453509|ref|NP_861715.1|;gi|32350328|gb|AAP75927.1|	80.43	86.96	46	9	0	1	46	1	46	3e-20	80.1	RB69ORF025c hypothetical protein [Enterobacteria phage RB69]
ORF006	gi|729030056|gb|AIZ01811.1|	59.52	78.57	42	16	1	1	42	1	41	1e-09	52.8	hypothetical protein VR5_024 [Enterobacteria phage vB_EcoM_VR5]
ORF006	gi|161622403|ref|YP_001595151.1|;gi|160213709|gb|ABX11048.1|	44.64	60.71	56	29	1	1	54	1	56	7e-09	50.4	Mrh.1 hypothetical protein [Enterobacteria phage JS98]
ORF006	gi|729030329|gb|AIZ02083.1|	49.02	64.71	51	24	1	1	49	1	51	7e-09	50.4	hypothetical protein VR20_025 [Enterobacteria phage vB_EcoM_VR20]
ORF006	gi|314121590|ref|YP_004063709.1|;gi|313151347|gb|ADR32403.1|;gi|729030616|gb|AIZ02369.1|	49.02	64.71	51	24	1	1	49	1	51	8e-09	50.4	Mrh.1 conserved hypothetical protein [Enterobacteria phage vB_EcoM-VR7]
ORF006	gi|729030911|gb|AIZ02663.1|	49.02	62.75	51	24	1	1	49	1	51	1e-08	50.1	hypothetical protein VR26_026 [Enterobacteria phage vB_EcoM_VR26]
ORF006	gi|422934118|ref|YP_007004154.1|;gi|345450627|gb|AEN93830.1|	47.06	60.78	51	25	1	1	49	1	51	9e-08	47.4	hypothetical protein EpBp7_0113 [Enterobacteria phage Bp7]
ORF006	gi|308814377|ref|YP_003934651.1|;gi|308205969|gb|ADO19368.1|	45.1	60.78	51	26	1	1	49	1	51	3e-07	45.8	hypothetical protein SP18_gp026 [Shigella phage SP18]
ORF007	gi|642905950|ref|YP_009037481.1|;gi|642904104|gb|AIA80124.1|;gi|815007486|gb|AKE45263.1|;gi|815008009|gb|AKE45783.1|;gi|815009008|gb|AKE46775.1|	96.61	98.31	59	2	0	1	59	1	59	2e-34	115	hypothetical protein JS09_0158 [Escherichia phage vB_EcoM_JS09]
ORF007	gi|725949828|ref|YP_009100564.1|;gi|678223464|gb|AIM50604.1|	94.92	98.31	59	3	0	1	59	1	59	5e-34	114	hypothetical protein [Shigella phage Shf125875]
ORF007	gi|682124302|ref|YP_009056614.1|;gi|604671737|gb|AHV82731.1|	84.75	89.83	59	9	0	1	59	1	59	2e-29	102	hypothetical protein PhAPEC2_22 [Escherichia phage vB_EcoM_PhAPEC2]
ORF007	gi|32453508|ref|NP_861714.1|;gi|32350327|gb|AAP75926.1|	83.05	89.83	59	10	0	1	59	1	59	5e-29	101	RB69ORF024c hypothetical protein [Enterobacteria phage RB69]
ORF007	gi|557307754|ref|YP_008767081.1|;gi|551733094|gb|AGY36959.1|	31.37	47.06	51	35	0	9	59	46	96	1.6	26.9	hypothetical protein FREDWARD_14 [Mycobacterium phage Fredward]
ORF007	gi|354464486|gb|AER26398.1|;gi|392284482|gb|AFM54910.1|	31.37	47.06	51	35	0	9	59	46	96	1.7	26.9	gp14 [Mycobacterium phage Saintus]
ORF007	gi|593780421|ref|YP_009018244.1|;gi|354996967|gb|AER48308.1|	28.85	48.08	52	37	0	8	59	46	97	2.1	26.6	gp17 [Mycobacterium phage BillKnuckles]
ORF007	gi|593775612|ref|YP_009013472.1|;gi|354998624|gb|AER49949.1|	28.85	48.08	52	37	0	8	59	61	112	2.2	26.6	gp17 [Mycobacterium phage Kugel]
ORF007	gi|423261626|ref|YP_007010152.1|;gi|394778147|gb|AFN39354.1|	39.29	60.71	28	17	0	21	48	45	72	2.3	26.6	hypothetical protein CC2_126 [Aeromonas phage CC2]
ORF007	gi|12657869|ref|NP_075282.1|;gi|12584010|gb|AAG59720.1|	28.85	48.08	52	37	0	8	59	46	97	2.6	26.2	gp15 [Mycobacterium phage Bxb1]
ORF008	gi|682124301|ref|YP_009056613.1|;gi|604671736|gb|AHV82730.1|	98.7	99.35	154	2	0	1	154	1	154	2e-109	313	transcription modulator under heat shock [Escherichia phage vB_EcoM_PhAPEC2]
ORF008	gi|642905951|ref|YP_009037482.1|;gi|642904105|gb|AIA80125.1|	96.75	98.05	154	5	0	1	154	1	154	4e-107	307	hypothetical protein JS09_0159 [Escherichia phage vB_EcoM_JS09]
ORF008	gi|725949827|ref|YP_009100563.1|;gi|678223463|gb|AIM50603.1|	95.87	97.52	121	3	1	1	119	1	121	3e-79	235	mrh protein [Shigella phage Shf125875]
ORF008	gi|32453506|ref|NP_861712.1|;gi|32350325|gb|AAP75924.1|	98.36	100	61	1	0	94	154	1	61	2e-37	127	RB69ORF022c hypothetical protein [Enterobacteria phage RB69]
ORF008	gi|32453507|ref|NP_861713.1|;gi|32350326|gb|AAP75925.1|	98.25	100	57	1	0	1	57	1	57	3e-34	118	Mrh transcription modulator under heat shock [Enterobacteria phage RB69]
ORF008	gi|422934447|ref|YP_007004408.1|;gi|339791230|gb|AEK12287.1|	26.71	45.96	161	100	4	1	153	1	151	1e-11	60.8	transcription modulator under heat shock [Enterobacteria phage ime09]
ORF008	gi|398313570|emb|CCI88917.1|	26.45	45.16	155	108	3	1	153	1	151	2e-11	60.1	protein of unknown function [Yersinia phage phiD1]
ORF008	gi|712914863|ref|YP_009102500.1|;gi|397134044|gb|AFO10551.1|	26.45	45.16	155	108	3	1	153	1	151	2e-11	60.1	hypothetical protein ECML134_025 [Escherichia phage ECML-134]
ORF008	gi|414086386|ref|YP_006986575.1|;gi|730984754|ref|YP_009110847.1|;gi|383396167|gb|AFH19983.1|;gi|694817467|gb|AIS73349.1|	25.32	45.57	158	106	4	1	153	1	151	3e-10	56.6	transcription modulator under heat shock [Enterobacteria phage vB_EcoM_ACG-C40]
ORF008	gi|330858550|ref|YP_004414925.1|;gi|327397484|gb|AEA72986.1|	25.32	45.57	158	106	4	1	153	1	151	3e-10	56.6	putative Mrh [Shigella phage Shfl2]
ORF009	gi|682124300|ref|YP_009056612.1|;gi|604671735|gb|AHV82729.1|	100	100	59	0	0	1	59	1	59	2e-36	120	hypothetical protein PhAPEC2_20 [Escherichia phage vB_EcoM_PhAPEC2]
ORF009	gi|642905952|ref|YP_009037483.1|;gi|642904106|gb|AIA80126.1|	98.31	100	59	1	0	1	59	1	59	3e-36	119	hypothetical protein JS09_0160 [Escherichia phage vB_EcoM_JS09]
ORF009	gi|725949826|ref|YP_009100562.1|;gi|678223462|gb|AIM50602.1|	98.21	100	56	1	0	4	59	1	56	7e-34	113	hypothetical protein [Shigella phage Shf125875]
ORF009	gi|32453505|ref|NP_861711.1|;gi|410492076|ref|YP_006907262.1|;gi|32350324|gb|AAP75923.1|;gi|407437665|gb|AFU20425.1|;gi|815007488|gb|AKE45265.1|;gi|815008007|gb|AKE45781.1|;gi|815009006|gb|AKE46773.1|	100	100	54	0	0	6	59	1	54	7e-33	110	ModA.2 conserved hypothetical protein [Enterobacteria phage RB69]
ORF009	gi|308814373|ref|YP_003934647.1|;gi|308205965|gb|ADO19364.1|	68.97	84.48	58	16	1	1	58	1	56	1e-22	84.7	hypothetical protein SP18_gp022 [Shigella phage SP18]
ORF009	gi|729030325|gb|AIZ02079.1|	68.97	82.76	58	16	1	1	58	1	56	5e-22	83.6	hypothetical protein VR20_021 [Enterobacteria phage vB_EcoM_VR20]
ORF009	gi|314121586|ref|YP_004063705.1|;gi|313151343|gb|ADR32399.1|	67.24	81.03	58	17	1	1	58	1	56	6e-22	83.2	ModA.2 conserved hypothetical protein [Enterobacteria phage vB_EcoM-VR7]
ORF009	gi|729030907|gb|AIZ02659.1|	67.24	81.03	58	17	1	1	58	1	56	6e-22	83.2	hypothetical protein VR26_022 [Enterobacteria phage vB_EcoM_VR26]
ORF009	gi|729030612|gb|AIZ02365.1|	65.52	81.03	58	18	1	1	58	1	56	2e-21	81.6	hypothetical protein VR25_021 [Enterobacteria phage vB_EcoM_VR25]
ORF009	gi|161622399|ref|YP_001595147.1|;gi|160213705|gb|ABX11044.1|	60	71.67	60	22	1	1	58	1	60	9e-17	70.1	ModA.2 hypothetical protein [Enterobacteria phage JS98]
ORF010	gi|682124299|ref|YP_009056611.1|;gi|604671734|gb|AHV82728.1|	98.15	100	54	1	0	1	54	1	54	5e-30	103	hypothetical protein PhAPEC2_19 [Escherichia phage vB_EcoM_PhAPEC2]
ORF010	gi|32453504|ref|NP_861710.1|;gi|642905953|ref|YP_009037484.1|;gi|725949825|ref|YP_009100561.1|;gi|32350323|gb|AAP75922.1|;gi|642904107|gb|AIA80127.1|;gi|678223461|gb|AIM50601.1|	96.3	98.15	54	2	0	1	54	1	54	3e-29	101	RB69ORF020c hypothetical protein [Enterobacteria phage RB69]
ORF010	gi|363539566|ref|YP_004893851.1|;gi|310660185|gb|ADP02440.1|;gi|408386674|gb|AFU63684.1|	41.03	58.97	39	23	0	5	43	22	60	0.6	28.1	45 gene product [Salmonella phage PVP-SE1]
ORF010	gi|161622401|ref|YP_001595149.1|;gi|238695176|ref|YP_002922369.1|;gi|160213707|gb|ABX11046.1|;gi|220029312|gb|ACL78246.1|	36.36	50	44	20	1	19	54	5	48	0.73	26.6	ModA.4 hypothetical protein [Enterobacteria phage JS98]
ORF010	gi|299778976|ref|YP_003734170.1|;gi|298105705|gb|ADI55349.1|	36.36	50	44	20	1	19	54	6	49	0.91	26.2	modA.4 gene product [Enterobacteria phage IME08]
ORF010	gi|729030054|gb|AIZ01809.1|	81.82	100	11	2	0	44	54	38	48	2.3	25.4	hypothetical protein VR5_022 [Enterobacteria phage vB_EcoM_VR5]
ORF010	gi|422934120|ref|YP_007004156.1|;gi|345450629|gb|AEN93832.1|	81.82	90.91	11	2	0	44	54	38	48	3.5	24.6	hypothetical protein EpBp7_0115 [Enterobacteria phage Bp7]
ORF010	gi|308814375|ref|YP_003934649.1|;gi|308205967|gb|ADO19366.1|	37.21	46.51	43	19	1	19	53	5	47	5	24.3	hypothetical protein SP18_gp024 [Shigella phage SP18]
ORF010	gi|729030614|gb|AIZ02367.1|	37.21	46.51	43	19	1	19	53	5	47	5.7	24.3	hypothetical protein VR25_023 [Enterobacteria phage vB_EcoM_VR25]
ORF010	gi|9632774|ref|NP_049639.1|;gi|731191|sp|P39426.1|Y01G_BPT4;gi|5354398|gb|AAD42605.1|AF158101_192;gi|1532081|gb|AAB07798.1|;gi|299780379|gb|ADJ39741.1|;gi|628971965|gb|AHY83686.1|;gi|628972154|gb|AHY83874.1|;gi|628972348|gb|AHY84067.1|;gi|698042613|gb|AIT74936.1|;gi|698042886|gb|AIT75208.1|	34.69	53.06	49	31	1	6	53	3	51	8.1	23.9	ModA.4 hypothetical protein [Enterobacteria phage T4]
ORF011	gi|32453503|ref|NP_861709.1|;gi|32350322|gb|AAP75921.1|	98.45	99.48	193	3	0	1	193	1	193	6e-143	401	ModB ADP-ribosylase [Enterobacteria phage RB69]
ORF011	gi|725949824|ref|YP_009100560.1|;gi|678223460|gb|AIM50600.1|	97.93	98.96	193	4	0	1	193	1	193	2e-142	400	ModB [Shigella phage Shf125875]
ORF011	gi|682124298|ref|YP_009056610.1|;gi|604671733|gb|AHV82727.1|	98.45	98.96	193	3	0	1	193	1	193	2e-142	399	ModB ADP-ribosylase [Escherichia phage vB_EcoM_PhAPEC2]
ORF011	gi|642905954|ref|YP_009037485.1|;gi|642904108|gb|AIA80128.1|	97.41	98.96	193	5	0	1	193	1	193	1e-141	398	ADP-ribosylase [Escherichia phage vB_EcoM_JS09]
ORF011	gi|238695173|ref|YP_002922366.1|;gi|220029309|gb|ACL78243.1|	64.97	81.92	177	62	0	17	193	13	189	9e-83	248	ModB ADP-ribosylase [Enterobacteria phage JS10]
ORF011	gi|729030051|gb|AIZ01806.1|	64.41	80.79	177	63	0	17	193	13	189	5e-82	246	ADP-ribosylase [Enterobacteria phage vB_EcoM_VR5]
ORF011	gi|299778973|ref|YP_003734167.1|;gi|298105702|gb|ADI55346.1|	64.41	81.36	177	63	0	17	193	18	194	5e-82	246	modB gene product [Enterobacteria phage IME08]
ORF011	gi|422934123|ref|YP_007004159.1|;gi|345450632|gb|AEN93835.1|	63.84	79.66	177	64	0	17	193	13	189	1e-80	243	ADP-ribosylase [Enterobacteria phage Bp7]
ORF011	gi|161622398|ref|YP_001595146.1|;gi|160213704|gb|ABX11043.1|	63.28	80.23	177	65	0	17	193	13	189	7e-80	241	ModB ADP-ribosylase [Enterobacteria phage JS98]
ORF011	gi|456351106|ref|YP_007501058.1|;gi|764161815|ref|YP_009126225.1|;gi|347466227|gb|AEO97013.1|;gi|586881452|gb|AHJ86872.1|	43.41	61.46	205	96	3	8	193	7	210	9e-49	162	ADP-rybosylase [Salmonella phage S16]
ORF012	gi|642905955|ref|YP_009037486.1|;gi|642904109|gb|AIA80129.1|	98.02	99.01	202	4	0	1	202	1	202	1e-148	416	RNA polymerase ADP-ribosylase [Escherichia phage vB_EcoM_JS09]
ORF012	gi|725949823|ref|YP_009100559.1|;gi|678223459|gb|AIM50599.1|	97.52	98.51	202	5	0	1	202	1	202	2e-147	413	ModA [Shigella phage Shf125875]
ORF012	gi|682124297|ref|YP_009056609.1|;gi|604671732|gb|AHV82726.1|	94.55	98.02	202	11	0	1	202	1	202	3e-143	402	ADP-ribosyltransferase [Escherichia phage vB_EcoM_PhAPEC2]
ORF012	gi|32453502|ref|NP_861708.1|;gi|32350321|gb|AAP75920.1|	93.5	97.5	200	13	0	3	202	1	200	2e-140	395	ModA RNA polymerase ADP-ribosylase [Enterobacteria phage RB69]
ORF012	gi|299778972|ref|YP_003734166.1|;gi|298105701|gb|ADI55345.1|	57.35	75	204	83	2	3	202	10	213	4e-78	238	modA gene product [Enterobacteria phage IME08]
ORF012	gi|422934124|ref|YP_007004160.1|;gi|345450633|gb|AEN93836.1|	56.86	74.51	204	84	2	3	202	1	204	2e-77	236	ADP-ribosylase [Enterobacteria phage Bp7]
ORF012	gi|161622397|ref|YP_001595145.1|;gi|238695172|ref|YP_002922365.1|;gi|160213703|gb|ABX11042.1|;gi|220029308|gb|ACL78242.1|	56.37	74.51	204	85	2	3	202	1	204	6e-77	234	ModA ADP-ribosylase [Enterobacteria phage JS98]
ORF012	gi|729030050|gb|AIZ01805.1|	56.8	71.84	206	81	3	3	202	1	204	4e-75	229	ADP-ribosylase [Enterobacteria phage vB_EcoM_VR5]
ORF012	gi|308814370|ref|YP_003934644.1|;gi|308205962|gb|ADO19361.1|	54.9	72.06	204	88	2	3	202	12	215	9e-73	224	ADP-ribosylase [Shigella phage SP18]
ORF012	gi|729030904|gb|AIZ02656.1|	54.5	76.19	189	82	2	17	201	16	204	3e-70	217	ADP-ribosylase [Enterobacteria phage vB_EcoM_VR26]
ORF013	gi|32453501|ref|NP_861707.1|;gi|642905956|ref|YP_009037487.1|;gi|682124296|ref|YP_009056608.1|;gi|725949822|ref|YP_009100558.1|;gi|32350320|gb|AAP75919.1|;gi|604671731|gb|AHV82725.1|;gi|642904110|gb|AIA80130.1|;gi|678223458|gb|AIM50598.1|	99.19	99.6	248	2	0	1	248	1	248	3e-179	498	putative Srd anti-sigma factor [Enterobacteria phage RB69]
ORF013	gi|308814369|ref|YP_003934643.1|;gi|308205961|gb|ADO19360.1|	73.68	85.83	247	64	1	2	248	3	248	4e-128	368	putative anti-sigma factor [Shigella phage SP18]
ORF013	gi|314121582|ref|YP_004063701.1|;gi|313151339|gb|ADR32395.1|	73.68	86.23	247	64	1	2	248	3	248	2e-127	366	Srd putative anti-sigma factor [Enterobacteria phage vB_EcoM-VR7]
ORF013	gi|729030321|gb|AIZ02075.1|	73.68	85.83	247	64	1	2	248	3	248	2e-127	366	putative anti-sigma factor [Enterobacteria phage vB_EcoM_VR20]
ORF013	gi|729030903|gb|AIZ02655.1|	73.68	85.83	247	64	1	2	248	3	248	6e-127	365	putative anti-sigma factor [Enterobacteria phage vB_EcoM_VR26]
ORF013	gi|729030608|gb|AIZ02361.1|	73.28	85.83	247	65	1	2	248	3	248	3e-126	363	putative anti-sigma factor [Enterobacteria phage vB_EcoM_VR25]
ORF013	gi|422934801|ref|YP_007004761.1|;gi|343177355|gb|AEM00681.1|;gi|815008261|gb|AKE46034.1|	69.23	83.81	247	75	1	2	248	3	248	1e-118	343	putative Srd anti-sigma factor [Escherichia phage wV7]
ORF013	gi|291290233|dbj|BAI83028.1|	68.83	83.81	247	76	1	2	248	6	251	3e-118	343	postulated decoy of host sigma70 or sigmaS [Enterobacteria phage AR1]
ORF013	gi|713322610|ref|YP_009102225.1|;gi|698042062|gb|AIT74387.1|	68.83	83.4	247	76	1	2	248	3	248	6e-118	342	putative decoy of host sigma70 or sigmaS [Enterobacteria phage RB27]
ORF013	gi|228860952|ref|YP_002853975.1|;gi|227438626|gb|ACP30938.1|;gi|398313563|emb|CCI88910.1|;gi|698043159|gb|AIT75480.1|	68.83	83.4	247	76	1	2	248	3	248	1e-117	342	Srd [Enterobacteria phage RB51]
ORF014	gi|642905957|ref|YP_009037488.1|;gi|725949821|ref|YP_009100557.1|;gi|642904111|gb|AIA80131.1|;gi|678223457|gb|AIM50597.1|;gi|815007493|gb|AKE45270.1|;gi|815008002|gb|AKE45776.1|;gi|815009001|gb|AKE46768.1|	99.03	99.03	103	1	0	1	103	1	103	3e-70	209	hypothetical protein JS09_0165 [Escherichia phage vB_EcoM_JS09]
ORF014	gi|682124295|ref|YP_009056607.1|;gi|604671730|gb|AHV82724.1|	98.06	99.03	103	2	0	1	103	1	103	5e-70	209	hypothetical protein PhAPEC2_15 [Escherichia phage vB_EcoM_PhAPEC2]
ORF014	gi|32453500|ref|NP_861706.1|;gi|32350319|gb|AAP75918.1|	98.91	98.91	92	1	0	12	103	1	92	8e-62	187	Dda.1 conserved hypothetical protein [Enterobacteria phage RB69]
ORF014	gi|228860951|ref|YP_002853974.1|;gi|422934800|ref|YP_007004760.1|;gi|227438625|gb|ACP30937.1|;gi|343177354|gb|AEM00680.1|;gi|398313562|emb|CCI88909.1|;gi|698043158|gb|AIT75479.1|;gi|815008260|gb|AKE46033.1|	78.64	87.38	103	22	0	1	103	1	103	6e-55	170	dda.1 hypothetical protein [Enterobacteria phage RB51]
ORF014	gi|525334286|gb|AGR45968.1|	77.67	87.38	103	23	0	1	103	1	103	2e-54	169	hypothetical protein [Yersinia phage PST]
ORF014	gi|422934439|ref|YP_007004400.1|;gi|339791222|gb|AEK12279.1|;gi|587757141|gb|AHK10874.1|	76.7	86.41	103	24	0	1	103	1	103	2e-53	166	hypothetical protein [Enterobacteria phage ime09]
ORF014	gi|414086378|ref|YP_006986567.1|;gi|291290232|dbj|BAI83027.1|;gi|383396159|gb|AFH19975.1|	77.67	85.44	103	23	0	1	103	1	103	2e-53	166	hypothetical protein ACG-C40_0016 [Enterobacteria phage vB_EcoM_ACG-C40]
ORF014	gi|330858542|ref|YP_004414917.1|;gi|730984746|ref|YP_009110839.1|;gi|327397476|gb|AEA72978.1|;gi|694817459|gb|AIS73341.1|	76.7	86.41	103	24	0	1	103	1	103	3e-53	166	hypothetical protein dda.1 [Shigella phage Shfl2]
ORF014	gi|116326238|ref|YP_802958.1|;gi|115343831|gb|ABI94840.1|;gi|698042331|gb|AIT74655.1|	77.67	84.47	103	23	0	1	103	1	103	6e-53	165	hypothetical protein RB32ORF016c [Enterobacteria phage RB32]
ORF014	gi|713322321|ref|YP_009098405.1|;gi|713322609|ref|YP_009102224.1|;gi|698040424|gb|AIT72755.1|;gi|698040698|gb|AIT73028.1|;gi|698040970|gb|AIT73299.1|;gi|698041242|gb|AIT73570.1|;gi|698041515|gb|AIT73842.1|;gi|698041788|gb|AIT74114.1|;gi|698042061|gb|AIT74386.1|	77.67	84.47	103	23	0	1	103	1	103	6e-53	165	hypothetical protein RB3_019 [Enterobacteria phage RB3]
ORF015	gi|642905958|ref|YP_009037489.1|;gi|642904112|gb|AIA80132.1|	99.54	99.77	437	2	0	1	437	1	437	0	909	DNA helicase [Escherichia phage vB_EcoM_JS09]
ORF015	gi|32453499|ref|NP_861705.1|;gi|32350318|gb|AAP75917.1|	99.31	99.77	437	3	0	1	437	1	437	0	907	Dda DNA helicase [Enterobacteria phage RB69]
ORF015	gi|682124294|ref|YP_009056606.1|;gi|604671729|gb|AHV82723.1|	99.31	99.54	437	3	0	1	437	1	437	0	907	DNA-dependent ATPase/helicase [Escherichia phage vB_EcoM_PhAPEC2]
ORF015	gi|725949820|ref|YP_009100556.1|;gi|678223456|gb|AIM50596.1|	99.08	99.77	437	4	0	1	437	1	437	0	906	DNA helicase [Shigella phage Shf125875]
ORF015	gi|639438945|ref|YP_009030902.1|;gi|712914853|ref|YP_009102490.1|;gi|397134034|gb|AFO10541.1|;gi|628971773|gb|AHY83495.1|	79.32	90.45	440	87	2	1	437	1	439	0	741	DNA helicase [Escherichia phage e11/2]
ORF015	gi|730984745|ref|YP_009110838.1|;gi|694817458|gb|AIS73340.1|;gi|698042330|gb|AIT74654.1|	79.32	90.45	440	87	2	1	437	1	439	0	741	gp31 [Shigella phage pSs-1]
ORF015	gi|330858541|ref|YP_004414916.1|;gi|422934438|ref|YP_007004399.1|;gi|327397475|gb|AEA72977.1|;gi|339791221|gb|AEK12278.1|	79.09	90.45	440	88	2	1	437	1	439	0	741	putative DNA helicase [Shigella phage Shfl2]
ORF015	gi|587757140|gb|AHK10873.1|	78.86	90.45	440	89	2	1	437	1	439	0	739	putative DNA helicase [Escherichia phage HY01]
ORF015	gi|698042606|gb|AIT74929.1|;gi|698042879|gb|AIT75201.1|	79.09	90.23	440	88	2	1	437	1	439	0	739	DNA helicase [Enterobacteria phage RB55]
ORF015	gi|713322320|ref|YP_009098404.1|;gi|713322608|ref|YP_009102223.1|;gi|698040423|gb|AIT72754.1|;gi|698040697|gb|AIT73027.1|;gi|698040969|gb|AIT73298.1|;gi|698041241|gb|AIT73569.1|;gi|698041514|gb|AIT73841.1|;gi|698041787|gb|AIT74113.1|;gi|698042060|gb|AIT74385.1|	79.09	90.23	440	88	2	1	437	1	439	0	739	DNA helicase [Enterobacteria phage RB3]
ORF016	gi|32453498|ref|NP_861704.1|;gi|642905959|ref|YP_009037490.1|;gi|32350317|gb|AAP75916.1|;gi|642904113|gb|AIA80133.1|	100	100	225	0	0	1	225	1	225	6e-168	467	exonuclease [Enterobacteria phage RB69]
ORF016	gi|725949819|ref|YP_009100555.1|;gi|678223455|gb|AIM50595.1|	99.56	100	225	1	0	1	225	1	225	2e-167	466	3' to 5' DNA exonuclease [Shigella phage Shf125875]
ORF016	gi|682124293|ref|YP_009056605.1|;gi|604671728|gb|AHV82722.1|	99.11	99.56	225	2	0	1	225	1	225	4e-166	462	exonuclease [Escherichia phage vB_EcoM_PhAPEC2]
ORF016	gi|161622392|ref|YP_001595140.1|;gi|160213698|gb|ABX11037.1|	83.33	88.29	222	37	0	4	225	3	224	3e-135	384	DexA exonuclease A [Enterobacteria phage JS98]
ORF016	gi|729030045|gb|AIZ01800.1|	82.88	88.74	222	38	0	4	225	3	224	3e-135	384	exonuclease [Enterobacteria phage vB_EcoM_VR5]
ORF016	gi|422934129|ref|YP_007004165.1|;gi|345450638|gb|AEN93841.1|	82.43	88.74	222	39	0	4	225	3	224	4e-135	384	exonuclease A [Enterobacteria phage Bp7]
ORF016	gi|238695167|ref|YP_002922360.1|;gi|220029303|gb|ACL78237.1|	82.43	88.29	222	39	0	4	225	3	224	1e-134	383	DexA exonuclease A [Enterobacteria phage JS10]
ORF016	gi|299778967|ref|YP_003734161.1|;gi|298105696|gb|ADI55340.1|	81.53	88.29	222	41	0	4	225	3	224	5e-134	381	dexA gene product [Enterobacteria phage IME08]
ORF016	gi|422934435|ref|YP_007004396.1|;gi|339791218|gb|AEK12275.1|	68.75	80.36	224	68	1	4	225	3	226	2e-108	316	exonuclease A [Enterobacteria phage ime09]
ORF016	gi|9632733|ref|NP_049629.1|;gi|228860946|ref|YP_002853969.1|;gi|228861327|ref|YP_002854348.1|;gi|330858537|ref|YP_004414912.1|;gi|414086374|ref|YP_006986563.1|;gi|422934795|ref|YP_007004755.1|;gi|712914850|ref|YP_009102487.1|;gi|713322604|ref|YP_009102219.1|;gi|730984741|ref|YP_009110834.1|;gi|119690|sp|P04536.1|EXOD_BPT4;gi|5354357|gb|AAD42564.1|AF158101_151;gi|15255|emb|CAA28536.1|;gi|227438343…	68.3	80.36	224	69	1	4	225	3	226	3e-108	315	DexA exonuclease A [Enterobacteria phage T4]
ORF017	gi|682124292|ref|YP_009056604.1|;gi|604671727|gb|AHV82721.1|	98.78	99.39	164	2	0	1	164	1	164	1e-117	334	hypothetical protein PhAPEC2_12 [Escherichia phage vB_EcoM_PhAPEC2]
ORF017	gi|725949818|ref|YP_009100554.1|;gi|678223454|gb|AIM50594.1|	97.56	98.78	164	4	0	1	164	1	164	3e-116	331	hypothetical protein [Shigella phage Shf125875]
ORF017	gi|642905960|ref|YP_009037491.1|;gi|642904114|gb|AIA80134.1|	92.12	95.15	165	11	2	1	164	1	164	1e-106	306	hypothetical protein JS09_0168 [Escherichia phage vB_EcoM_JS09]
ORF017	gi|32453497|ref|NP_861703.1|;gi|32350316|gb|AAP75915.1|	98.37	100	123	2	0	1	123	1	123	1e-85	252	MotB.1 conserved hypothetical protein [Enterobacteria phage RB69]
ORF017	gi|228860944|ref|YP_002853967.1|;gi|227438618|gb|ACP30930.1|;gi|698043151|gb|AIT75472.1|	71.6	79.88	169	43	2	1	164	1	169	1e-81	243	hypothetical protein RB51ORF012 [Enterobacteria phage RB51]
ORF017	gi|330858535|ref|YP_004414910.1|;gi|327397469|gb|AEA72971.1|	51.23	66.05	162	77	2	3	162	2	163	4e-47	155	putative MotB.1 [Shigella phage Shfl2]
ORF017	gi|398313555|emb|CCI88902.1|	51.23	66.05	162	77	2	3	162	2	163	6e-47	154	protein of unknown function [Yersinia phage phiD1]
ORF017	gi|422934793|ref|YP_007004753.1|;gi|291290225|dbj|BAI83020.1|;gi|343177347|gb|AEM00673.1|;gi|815008253|gb|AKE46026.1|	50.62	66.05	162	78	2	3	162	2	163	1e-46	154	hypothetical protein [Escherichia phage wV7]
ORF017	gi|713322314|ref|YP_009098398.1|;gi|713322602|ref|YP_009102217.1|;gi|698040417|gb|AIT72748.1|;gi|698040691|gb|AIT73021.1|;gi|698040963|gb|AIT73292.1|;gi|698041235|gb|AIT73563.1|;gi|698041508|gb|AIT73835.1|;gi|698041781|gb|AIT74107.1|;gi|698042054|gb|AIT74379.1|	48.45	61.49	161	62	2	3	162	2	142	1e-42	143	hypothetical protein RB3_012 [Enterobacteria phage RB3]
ORF017	gi|299780367|gb|ADJ39729.1|;gi|698042601|gb|AIT74924.1|;gi|698042874|gb|AIT75196.1|	46.3	59.26	162	67	1	3	164	2	143	4e-40	136	hypothetical protein T4Tp011 [Enterobacteria phage T4T]
ORF018	gi|32453495|ref|NP_861701.1|;gi|32350314|gb|AAP75913.1|	90.26	94.16	154	12	1	1	154	1	151	1e-97	283	MotB modifier of transcription [Enterobacteria phage RB69]
ORF018	gi|682124291|ref|YP_009056603.1|;gi|604671726|gb|AHV82720.1|	90.26	93.51	154	12	1	1	154	1	151	2e-97	282	modifier of transcription [Escherichia phage vB_EcoM_PhAPEC2]
ORF018	gi|642905961|ref|YP_009037492.1|;gi|642904115|gb|AIA80135.1|	89.61	93.51	154	13	1	1	154	1	151	1e-96	280	modifier of transcription [Escherichia phage vB_EcoM_JS09]
ORF018	gi|713322313|ref|YP_009098397.1|;gi|713322601|ref|YP_009102216.1|;gi|698040416|gb|AIT72747.1|;gi|698040690|gb|AIT73020.1|;gi|698040962|gb|AIT73291.1|;gi|698041234|gb|AIT73562.1|;gi|698041507|gb|AIT73834.1|;gi|698041780|gb|AIT74106.1|;gi|698042053|gb|AIT74378.1|	84.08	91.72	157	22	1	1	154	1	157	2e-92	270	modifier of transcription [Enterobacteria phage RB3]
ORF018	gi|228860943|ref|YP_002853966.1|;gi|227438617|gb|ACP30929.1|;gi|698043150|gb|AIT75471.1|	83.44	91.08	157	23	1	1	154	1	157	1e-91	268	MotB [Enterobacteria phage RB51]
ORF018	gi|422934432|ref|YP_007004393.1|;gi|339791215|gb|AEK12272.1|	79.62	88.54	157	29	1	1	154	2	158	8e-87	256	modifier of transcription [Enterobacteria phage ime09]
ORF018	gi|725949817|ref|YP_009100553.1|;gi|678223453|gb|AIM50593.1|	78.85	81.41	156	28	2	4	154	20	175	3e-77	232	transcription factor MotB [Shigella phage Shf125875]
ORF018	gi|729030896|gb|AIZ02648.1|	55.92	69.74	152	59	1	5	148	6	157	1e-48	158	modifier of transcription [Enterobacteria phage vB_EcoM_VR26]
ORF018	gi|161622389|ref|YP_001595137.1|;gi|160213695|gb|ABX11034.1|	51.91	62.3	183	59	4	1	154	1	183	8e-48	157	MotB modifier of transcription [Enterobacteria phage JS98]
ORF018	gi|308814362|ref|YP_003934636.1|;gi|308205954|gb|ADO19353.1|	54.61	65.79	152	61	1	5	148	6	157	4e-45	149	modifier of transcription [Shigella phage SP18]
ORF019	gi|642905962|ref|YP_009037493.1|;gi|642904116|gb|AIA80136.1|	95.68	97.12	139	6	0	1	139	1	139	5e-94	273	hypothetical protein JS09_0170 [Escherichia phage vB_EcoM_JS09]
ORF019	gi|228860942|ref|YP_002853965.1|;gi|422934431|ref|YP_007004392.1|;gi|713322312|ref|YP_009098396.1|;gi|713322600|ref|YP_009102215.1|;gi|227438616|gb|ACP30928.1|;gi|339791214|gb|AEK12271.1|;gi|698040415|gb|AIT72746.1|;gi|698040689|gb|AIT73019.1|;gi|698040961|gb|AIT73290.1|;gi|698041233|gb|AIT73561.1|;gi|698041506|gb|AIT73833.1|;gi|698041779|gb|AIT74105.1|;gi|698042052|gb|AIT74377.1|;gi|698043149|gb…	90.65	95.68	139	13	0	1	139	1	139	3e-89	260	hypothetical protein RB51ORF010 [Enterobacteria phage RB51]
ORF019	gi|682124290|ref|YP_009056602.1|;gi|604671725|gb|AHV82719.1|	90.65	94.24	139	13	0	1	139	1	139	1e-88	259	hypothetical protein PhAPEC2_10 [Escherichia phage vB_EcoM_PhAPEC2]
ORF019	gi|32453494|ref|NP_861700.1|;gi|32350313|gb|AAP75912.1|	87.05	91.37	139	18	0	1	139	1	139	8e-85	249	RB69ORF010c similar to motB [Enterobacteria phage RB69]
ORF019	gi|725949816|ref|YP_009100552.1|;gi|678223452|gb|AIM50592.1|	85.61	90.65	139	20	0	1	139	1	139	2e-83	245	hypothetical protein [Shigella phage Shf125875]
ORF019	gi|32453495|ref|NP_861701.1|;gi|32350314|gb|AAP75913.1|	44.83	53.79	145	62	4	6	133	2	145	2e-26	100	MotB modifier of transcription [Enterobacteria phage RB69]
ORF019	gi|642905961|ref|YP_009037492.1|;gi|642904115|gb|AIA80135.1|	44.14	54.48	145	63	4	6	133	2	145	3e-26	99.8	modifier of transcription [Escherichia phage vB_EcoM_JS09]
ORF019	gi|525334278|gb|AGR45960.1|	38.65	53.99	163	73	4	4	139	1	163	2e-25	98.2	modifier of transcription [Yersinia phage PST]
ORF019	gi|682124291|ref|YP_009056603.1|;gi|604671726|gb|AHV82720.1|	43.45	53.1	145	64	4	6	133	2	145	1e-24	95.9	modifier of transcription [Escherichia phage vB_EcoM_PhAPEC2]
ORF019	gi|713322313|ref|YP_009098397.1|;gi|713322601|ref|YP_009102216.1|;gi|698040416|gb|AIT72747.1|;gi|698040690|gb|AIT73020.1|;gi|698040962|gb|AIT73291.1|;gi|698041234|gb|AIT73562.1|;gi|698041507|gb|AIT73834.1|;gi|698041780|gb|AIT74106.1|;gi|698042053|gb|AIT74378.1|	42.76	52.63	152	63	5	6	134	2	152	2e-24	95.1	modifier of transcription [Enterobacteria phage RB3]
ORF020	gi|725949815|ref|YP_009100551.1|;gi|678223451|gb|AIM50591.1|	98.28	100	174	3	0	1	174	1	174	2e-127	360	hypothetical protein [Shigella phage Shf125875]
ORF020	gi|682124289|ref|YP_009056601.1|;gi|604671724|gb|AHV82718.1|	97.7	100	174	4	0	1	174	1	174	1e-126	358	hypothetical protein PhAPEC2_9 [Escherichia phage vB_EcoM_PhAPEC2]
ORF020	gi|642905963|ref|YP_009037494.1|;gi|642904117|gb|AIA80137.1|	97.13	100	174	5	0	1	174	1	174	1e-125	356	hypothetical protein JS09_0171 [Escherichia phage vB_EcoM_JS09]
ORF020	gi|32453493|ref|NP_861699.1|;gi|32350312|gb|AAP75911.1|	97.13	98.28	174	5	0	1	174	1	174	1e-124	353	MotB.2 conserved hypothetical protein [Enterobacteria phage RB69]
ORF020	gi|525334280|gb|AGR45962.1|	32.98	48.94	188	94	8	1	174	1	170	1e-14	70.1	hypothetical protein [Yersinia phage PST]
ORF020	gi|161622391|ref|YP_001595139.1|;gi|160213697|gb|ABX11036.1|	34.05	51.89	185	93	10	1	174	1	167	1e-14	69.7	MotB.2 hypothetical protein [Enterobacteria phage JS98]
ORF020	gi|639438941|ref|YP_009030898.1|;gi|628971769|gb|AHY83491.1|	35.52	48.63	183	91	10	1	174	1	165	5e-14	68.2	hypothetical protein e112_014 [Escherichia phage e11/2]
ORF020	gi|422934794|ref|YP_007004754.1|;gi|291290226|dbj|BAI83021.1|;gi|343177348|gb|AEM00674.1|;gi|815008254|gb|AKE46027.1|	34.41	46.77	186	92	9	1	173	1	169	2e-13	66.6	hypothetical protein [Escherichia phage wV7]
ORF020	gi|116326233|ref|YP_802953.1|;gi|115343826|gb|ABI94835.1|	34.97	48.09	183	93	9	1	174	1	166	4e-13	65.5	hypothetical protein RB32ORF011c [Enterobacteria phage RB32]
ORF020	gi|238695166|ref|YP_002922359.1|;gi|220029302|gb|ACL78236.1|	34.24	49.46	184	94	9	1	174	1	167	4e-13	65.5	MotB.2 hypothetical protein [Enterobacteria phage JS10]
ORF021	gi|642905964|ref|YP_009037495.1|;gi|682124288|ref|YP_009056600.1|;gi|604671723|gb|AHV82717.1|;gi|642904118|gb|AIA80138.1|;gi|815007500|gb|AKE45277.1|;gi|815007995|gb|AKE45769.1|;gi|815008994|gb|AKE46761.1|	100	100	75	0	0	1	75	1	75	5e-49	153	hypothetical protein JS09_0172 [Escherichia phage vB_EcoM_JS09]
ORF021	gi|410492077|ref|YP_006907263.1|;gi|407437666|gb|AFU20426.1|	98.67	100	75	1	0	1	75	1	75	2e-48	152	hypothetical protein HX01_0169 [Enterobacteria phage HX01]
ORF021	gi|725949814|ref|YP_009100550.1|;gi|678223450|gb|AIM50590.1|	98.67	98.67	75	1	0	1	75	1	75	4e-48	151	modifier of suppressor tRNAs [Shigella phage Shf125875]
ORF021	gi|32453492|ref|NP_861698.1|;gi|32350311|gb|AAP75910.1|	97.33	98.67	75	2	0	1	75	1	75	2e-47	149	cef modifier of suppressor tRNAs [Enterobacteria phage RB69]
ORF021	gi|730984737|ref|YP_009110830.1|;gi|694817450|gb|AIS73332.1|	65.33	78.67	75	22	1	1	75	1	71	5e-28	99.8	gp23 [Shigella phage pSs-1]
ORF021	gi|291290222|dbj|BAI83017.1|	66.67	78.67	75	21	1	1	75	1	71	6e-28	99.8	cef modifier of suppressor tRNAs [Enterobacteria phage AR1]
ORF021	gi|422934429|ref|YP_007004390.1|;gi|339791212|gb|AEK12269.1|	66.67	77.33	75	21	1	1	75	1	71	9e-28	99	modifier of suppressor tRNAs [Enterobacteria phage ime09]
ORF021	gi|116326230|ref|YP_802950.1|;gi|115343823|gb|ABI94832.1|;gi|587757133|gb|AHK10866.1|;gi|698042322|gb|AIT74646.1|	65.33	77.33	75	22	1	1	75	1	71	1e-27	98.6	modifier of suppressor T4 tRNAs [Enterobacteria phage RB32]
ORF021	gi|414086370|ref|YP_006986559.1|;gi|383396151|gb|AFH19967.1|	65.33	77.33	75	22	1	1	75	1	71	1e-27	98.6	modifier of suppressor tRNAs [Enterobacteria phage vB_EcoM_ACG-C40]
ORF021	gi|228860940|ref|YP_002853963.1|;gi|227438614|gb|ACP30926.1|;gi|698043147|gb|AIT75468.1|	65.33	78.67	75	22	1	1	75	1	71	1e-27	98.6	modifier of suppressor T4 tRNAs [Enterobacteria phage RB51]
ORF022	gi|725949813|ref|YP_009100549.1|;gi|678223449|gb|AIM50589.1|	98.53	100	136	2	0	1	136	1	136	4e-98	283	mRNA metabolism modulator [Shigella phage Shf125875]
ORF022	gi|682124287|ref|YP_009056599.1|;gi|604671722|gb|AHV82716.1|	97.79	99.26	136	3	0	1	136	1	136	2e-97	281	mRNA metabolism modulator [Escherichia phage vB_EcoM_PhAPEC2]
ORF022	gi|32453491|ref|NP_861697.1|;gi|32350310|gb|AAP75909.1|	97.06	99.26	136	4	0	1	136	1	136	6e-96	277	goF mRNA metabolism modulator [Enterobacteria phage RB69]
ORF022	gi|642905965|ref|YP_009037496.1|;gi|642904119|gb|AIA80139.1|	96.32	97.79	136	5	0	1	136	1	136	1e-94	274	mRNA metabolism modulator [Escherichia phage vB_EcoM_JS09]
ORF022	gi|116326229|ref|YP_802949.1|;gi|115343822|gb|ABI94831.1|;gi|587757132|gb|AHK10865.1|;gi|698042321|gb|AIT74645.1|	77.37	89.05	137	30	1	1	136	1	137	2e-76	228	RNA metabolism moderator [Enterobacteria phage RB32]
ORF022	gi|525334276|gb|AGR45958.1|	76.64	89.05	137	31	1	1	136	1	137	3e-76	227	mRNA metabolism modulator [Yersinia phage PST]
ORF022	gi|713322597|ref|YP_009102212.1|;gi|698042049|gb|AIT74374.1|	76.26	87.77	139	30	1	1	136	1	139	2e-73	220	mRNA metabolism modulator [Enterobacteria phage RB27]
ORF022	gi|713322309|ref|YP_009098393.1|;gi|698040412|gb|AIT72743.1|;gi|698040686|gb|AIT73016.1|;gi|698040958|gb|AIT73287.1|;gi|698041230|gb|AIT73558.1|;gi|698041503|gb|AIT73830.1|;gi|698041776|gb|AIT74102.1|	75.54	87.05	139	31	1	1	136	1	139	3e-72	217	mRNA metabolism modulator [Enterobacteria phage RB3]
ORF022	gi|330858531|ref|YP_004414906.1|;gi|327397465|gb|AEA72967.1|	73.38	87.05	139	34	1	1	136	1	139	1e-71	215	putative RNA metabolism moderator [Shigella phage Shfl2]
ORF022	gi|730984736|ref|YP_009110829.1|;gi|694817449|gb|AIS73331.1|	74.1	87.05	139	33	1	1	136	1	139	2e-71	215	gp22 [Shigella phage pSs-1]
ORF023	gi|32453490|ref|NP_861696.1|;gi|725949812|ref|YP_009100548.1|;gi|32350309|gb|AAP75908.1|;gi|678223448|gb|AIM50588.1|;gi|815007502|gb|AKE45279.1|;gi|815007993|gb|AKE45767.1|;gi|815008992|gb|AKE46759.1|	100	100	59	0	0	1	59	1	59	3e-38	125	gp39.2 conserved hypothetical protein [Enterobacteria phage RB69]
ORF023	gi|642905966|ref|YP_009037497.1|;gi|642904120|gb|AIA80140.1|	98.31	100	59	1	0	1	59	1	59	5e-38	124	hypothetical protein JS09_0174 [Escherichia phage vB_EcoM_JS09]
ORF023	gi|713322308|ref|YP_009098392.1|;gi|713322596|ref|YP_009102211.1|;gi|698040411|gb|AIT72742.1|;gi|698040685|gb|AIT73015.1|;gi|698040957|gb|AIT73286.1|;gi|698041229|gb|AIT73557.1|;gi|698041502|gb|AIT73829.1|;gi|698041775|gb|AIT74101.1|;gi|698042048|gb|AIT74373.1|	92.98	98.25	57	4	0	1	57	1	57	5e-35	116	hypothetical protein RB3_006 [Enterobacteria phage RB3]
ORF023	gi|228861321|ref|YP_002854342.1|;gi|422935056|ref|YP_007004748.1|;gi|227438337|gb|ACP30650.1|;gi|291290220|dbj|BAI83015.1|;gi|343177610|gb|AEM00936.1|;gi|398313550|emb|CCI88897.1|;gi|815008248|gb|AKE46021.1|	92.98	98.25	57	4	0	1	57	1	57	2e-34	115	gp39.2 hypothetical protein [Enterobacteria phage RB14]
ORF023	gi|228860938|ref|YP_002853961.1|;gi|227438612|gb|ACP30924.1|;gi|698043145|gb|AIT75466.1|	91.23	98.25	57	5	0	1	57	1	57	6e-34	114	gp39.2 hypothetical protein [Enterobacteria phage RB51]
ORF023	gi|330858530|ref|YP_004414905.1|;gi|327397464|gb|AEA72966.1|	91.23	96.49	57	5	0	1	57	1	57	1e-33	113	hypothetical protein Shfl2p006 [Shigella phage Shfl2]
ORF023	gi|422934427|ref|YP_007004388.1|;gi|339791210|gb|AEK12267.1|	91.23	96.49	57	5	0	1	57	1	57	2e-33	112	conserved hypothetical protein [Enterobacteria phage ime09]
ORF023	gi|729030039|gb|AIZ01794.1|;gi|729030598|gb|AIZ02351.1|	85.96	92.98	57	8	0	1	57	1	57	8e-32	108	hypothetical protein VR5_007 [Enterobacteria phage vB_EcoM_VR5]
ORF023	gi|161622386|ref|YP_001595134.1|;gi|238695161|ref|YP_002922354.1|;gi|299778961|ref|YP_003734155.1|;gi|422934134|ref|YP_007004170.1|;gi|160213692|gb|ABX11031.1|;gi|220029297|gb|ACL78231.1|;gi|298105690|gb|ADI55334.1|;gi|345450643|gb|AEN93846.1|	84.48	91.38	58	9	0	1	58	1	58	8e-32	108	gp39.2 hypothetical protein [Enterobacteria phage JS98]
ORF023	gi|314121570|ref|YP_004063689.1|;gi|313151327|gb|ADR32383.1|;gi|729030893|gb|AIZ02645.1|	84.21	92.98	57	9	0	1	57	1	57	3e-31	107	gp39.2 conserved hypothetical protein [Enterobacteria phage vB_EcoM-VR7]
ORF024	gi|725949811|ref|YP_009100547.1|;gi|678223447|gb|AIM50587.1|	98.58	99.29	141	2	0	1	141	1	141	3e-96	278	hypothetical protein [Shigella phage Shf125875]
ORF024	gi|682124285|ref|YP_009056597.1|;gi|604671720|gb|AHV82714.1|	97.16	98.58	141	4	0	1	141	1	141	5e-95	275	hypothetical protein PhAPEC2_5 [Escherichia phage vB_EcoM_PhAPEC2]
ORF024	gi|32453489|ref|NP_861695.1|;gi|642905967|ref|YP_009037498.1|;gi|32350308|gb|AAP75907.1|;gi|642904121|gb|AIA80141.1|	91.49	92.91	141	11	1	1	141	1	140	3e-85	250	RB69ORF005c hypothetical protein [Enterobacteria phage RB69]
ORF024	gi|228860937|ref|YP_002853960.1|;gi|227438611|gb|ACP30923.1|;gi|698043144|gb|AIT75465.1|	40.15	60.58	137	67	4	6	141	2	124	3e-24	94	RB32ORF005c hypothetical protein [Enterobacteria phage RB51]
ORF024	gi|713322307|ref|YP_009098391.1|;gi|713322595|ref|YP_009102210.1|;gi|698040410|gb|AIT72741.1|;gi|698040684|gb|AIT73014.1|;gi|698040956|gb|AIT73285.1|;gi|698041228|gb|AIT73556.1|;gi|698041501|gb|AIT73828.1|;gi|698041774|gb|AIT74100.1|;gi|698042047|gb|AIT74372.1|	39.42	59.12	137	67	4	6	141	2	123	9e-23	90.1	hypothetical protein RB3_005 [Enterobacteria phage RB3]
ORF024	gi|228861320|ref|YP_002854341.1|;gi|227438336|gb|ACP30649.1|	38.69	59.85	137	68	4	6	141	2	123	6e-22	88.2	RB32ORF005c hypothetical protein [Enterobacteria phage RB14]
ORF024	gi|422934788|ref|YP_007004747.1|;gi|343177342|gb|AEM00668.1|;gi|815008247|gb|AKE46020.1|	36.5	59.12	137	72	4	6	141	2	124	1e-20	84.7	hypothetical phage protein [Escherichia phage wV7]
ORF024	gi|398313549|emb|CCI88896.1|	37.96	59.85	137	69	5	6	141	2	123	1e-20	84.3	protein of unknown function [Yersinia phage phiD1]
ORF024	gi|291290219|dbj|BAI83014.1|	38.69	59.85	137	68	5	6	141	2	123	6e-20	82.8	hypothetical protein AR1_005 [Enterobacteria phage AR1]
ORF024	gi|525334274|gb|AGR45956.1|	39.42	59.12	137	67	5	6	141	2	123	7e-20	82.4	hypothetical protein [Yersinia phage PST]
ORF025	gi|642905968|ref|YP_009037499.1|;gi|642904122|gb|AIA80142.1|	99.67	99.83	605	2	0	1	605	1	605	0	1253	DNA topoisomerase II large subunit [Escherichia phage vB_EcoM_JS09]
ORF025	gi|682124284|ref|YP_009056596.1|;gi|604671719|gb|AHV82713.1|	99.5	99.83	605	3	0	1	605	1	605	0	1252	topoisomerase II large subunit [Escherichia phage vB_EcoM_PhAPEC2]
ORF025	gi|725949807|ref|YP_009100546.1|;gi|678223443|gb|AIM50583.1|	96.53	97.36	606	20	1	1	605	1	606	0	1204	topoisomerase II subunit [Shigella phage Shf125875]
ORF025	gi|32453488|ref|NP_861694.1|;gi|32350307|gb|AAP75906.1|	95.87	96.86	606	24	1	1	605	1	606	0	1126	DNA topoisomerase II large subunit [Enterobacteria phage RB69]
ORF025	gi|161622384|ref|YP_001595132.1|;gi|160213690|gb|ABX11029.1|	84.79	92.4	605	92	0	1	605	1	605	0	1050	gp39 topoisomerase II large subunit N-terminal region [Enterobacteria phage JS98]
ORF025	gi|238695159|ref|YP_002922352.1|;gi|220029295|gb|ACL78229.1|	84.63	92.4	605	93	0	1	605	1	605	0	1048	gp39 topoisomerase II, large subunit, N-terminal region [Enterobacteria phage JS10]
ORF025	gi|729030037|gb|AIZ01792.1|	84.63	92.23	605	93	0	1	605	1	605	0	1048	DNA topoisomerase II large subunit [Enterobacteria phage vB_EcoM_VR5]
ORF025	gi|299778959|ref|YP_003734153.1|;gi|298105688|gb|ADI55332.1|	84.3	92.56	605	95	0	1	605	1	605	0	1047	39 gene product [Enterobacteria phage IME08]
ORF025	gi|228860935|ref|YP_002853958.1|;gi|227438609|gb|ACP30921.1|;gi|698043142|gb|AIT75463.1|	82.64	91.24	605	104	1	1	605	1	604	0	1028	gp60plus39 DNA topoisomerase subunit [Enterobacteria phage RB51]
ORF025	gi|730984732|ref|YP_009110825.1|;gi|694817445|gb|AIS73327.1|	82.48	91.07	605	105	1	1	605	1	604	0	1026	gp18 [Shigella phage pSs-1]
ORF026	gi|642905969|ref|YP_009037500.1|;gi|642904123|gb|AIA80143.1|;gi|815007505|gb|AKE45282.1|;gi|815007990|gb|AKE45764.1|;gi|815008990|gb|AKE46757.1|	99.45	99.73	366	2	0	1	366	1	366	0	757	hypothetical protein JS09_0177 [Escherichia phage vB_EcoM_JS09]
ORF026	gi|32453487|ref|NP_861693.1|;gi|32350306|gb|AAP75905.1|	99.18	99.45	366	3	0	1	366	1	366	0	755	RB69ORF003c hypothetical protein [Enterobacteria phage RB69]
ORF026	gi|725949810|ref|YP_009100545.1|;gi|678223446|gb|AIM50586.1|	99.17	99.45	363	3	0	4	366	1	363	0	749	hypothetical protein [Shigella phage Shf125875]
ORF026	gi|682124283|ref|YP_009056595.1|;gi|604671718|gb|AHV82712.1|	98.36	98.91	366	6	0	1	366	1	366	0	749	hypothetical protein PhAPEC2_3 [Escherichia phage vB_EcoM_PhAPEC2]
ORF026	gi|311992827|ref|YP_004009694.1|;gi|295815116|gb|ADG36042.1|	41.49	63.03	376	205	8	1	365	1	372	2e-100	306	hypothetical protein Acj61p077 [Acinetobacter phage Acj61]
ORF026	gi|311992826|ref|YP_004009693.1|;gi|295815115|gb|ADG36041.1|	41.62	61.35	370	206	6	1	362	1	368	1e-95	294	hypothetical protein Acj61p076 [Acinetobacter phage Acj61]
ORF026	gi|311993352|ref|YP_004010217.1|;gi|295917309|gb|ADG59980.1|	40.38	58.54	369	210	7	1	361	1	367	2e-86	270	hypothetical protein Acj9p080 [Acinetobacter phage Acj9]
ORF026	gi|311993353|ref|YP_004010218.1|;gi|295917310|gb|ADG59981.1|	51.88	64.66	133	60	1	232	360	10	142	3e-38	137	hypothetical protein Acj9p081 [Acinetobacter phage Acj9]
ORF026	gi|311993354|ref|YP_004010219.1|;gi|295917311|gb|ADG59982.1|	34.72	53.89	193	114	6	1	185	1	189	1e-31	122	hypothetical protein Acj9p082 [Acinetobacter phage Acj9]
ORF026	gi|414088148|ref|YP_006988326.1|;gi|408731518|gb|AFU87962.1|	34.21	57.89	38	25	0	17	54	44	81	3.1	30.8	hypothetical protein CcrColossus_gp092 [Caulobacter phage CcrColossus]
ORF027	gi|32453486|ref|NP_861692.1|;gi|642905970|ref|YP_009037501.1|;gi|682124282|ref|YP_009056594.1|;gi|725949809|ref|YP_009100544.1|;gi|32350305|gb|AAP75904.1|;gi|604671717|gb|AHV82711.1|;gi|642904124|gb|AIA80144.1|;gi|678223445|gb|AIM50585.1|;gi|815007506|gb|AKE45283.1|;gi|815007989|gb|AKE45763.1|;gi|815008989|gb|AKE46756.1|	100	100	66	0	0	1	66	1	66	2e-39	128	rIIA.1 conserved hypothetical protein [Enterobacteria phage RB69]
ORF027	gi|410492078|ref|YP_006907264.1|;gi|407437667|gb|AFU20427.1|	98.48	100	66	1	0	1	66	1	66	6e-39	127	hypothetical protein HX01_0176 [Enterobacteria phage HX01]
ORF027	gi|161622383|ref|YP_001595131.1|;gi|238695158|ref|YP_002922351.1|;gi|160213689|gb|ABX11028.1|;gi|220029294|gb|ACL78228.1|	75.76	86.36	66	16	0	1	66	1	66	4e-28	99.4	rIIA.1 hypothetical protein [Enterobacteria phage JS98]
ORF027	gi|299778958|ref|YP_003734152.1|;gi|422934140|ref|YP_007004176.1|;gi|298105687|gb|ADI55331.1|;gi|345450649|gb|AEN93852.1|;gi|729030034|gb|AIZ01789.1|	74.24	86.36	66	17	0	1	66	1	66	1e-27	98.6	rIIA.1 gene product [Enterobacteria phage IME08]
ORF027	gi|116326224|ref|YP_802944.1|;gi|228861317|ref|YP_002854338.1|;gi|330858526|ref|YP_004414901.1|;gi|414086364|ref|YP_006986553.1|;gi|422934423|ref|YP_007004384.1|;gi|422934785|ref|YP_007004744.1|;gi|639438929|ref|YP_009030886.1|;gi|712914841|ref|YP_009102478.1|;gi|730984731|ref|YP_009110824.1|;gi|115343817|gb|ABI94826.1|;gi|227438333|gb|ACP30646.1|;gi|327397460|gb|AEA72962.1|;gi|339791206|gb|AEK12…	71.21	87.88	66	19	0	1	66	1	66	2e-27	97.8	hypothetical protein RB32ORF002c [Enterobacteria phage RB32]
ORF027	gi|228860934|ref|YP_002853957.1|;gi|227438608|gb|ACP30920.1|;gi|587757126|gb|AHK10859.1|;gi|698043141|gb|AIT75462.1|	71.21	87.88	66	19	0	1	66	1	66	2e-27	97.4	rIIA.1 hypothetical protein [Enterobacteria phage RB51]
ORF027	gi|713322304|ref|YP_009098388.1|;gi|713322592|ref|YP_009102207.1|;gi|698040407|gb|AIT72738.1|;gi|698040681|gb|AIT73011.1|;gi|698040953|gb|AIT73282.1|;gi|698041225|gb|AIT73553.1|;gi|698041498|gb|AIT73825.1|;gi|698041771|gb|AIT74097.1|;gi|698042044|gb|AIT74369.1|	71.21	87.88	66	19	0	1	66	1	66	2e-27	97.4	hypothetical protein RB3_002 [Enterobacteria phage RB3]
ORF027	gi|9632817|ref|NP_049617.1|;gi|139463|sp|P25186.1|Y00A_BPT4;gi|5354441|gb|AAD42648.1|AF158101_235;gi|15178|emb|CAA36910.1|;gi|299780358|gb|ADJ39720.1|;gi|628971944|gb|AHY83665.1|;gi|628972133|gb|AHY83853.1|;gi|628972328|gb|AHY84047.1|;gi|698042592|gb|AIT74915.1|;gi|698042865|gb|AIT75187.1|	71.21	87.88	66	19	0	1	66	1	66	3e-27	97.4	rIIA.1 hypothetical protein [Enterobacteria phage T4]
ORF027	gi|291290215|dbj|BAI83010.1|	71.21	86.36	66	19	0	1	66	1	66	3e-27	97.4	conserved hypothetical protein [Enterobacteria phage AR1]
ORF027	gi|729030306|gb|AIZ02060.1|	69.7	84.85	66	20	0	1	66	1	66	1e-25	93.2	hypothetical protein VR20_002 [Enterobacteria phage vB_EcoM_VR20]
ORF028	gi|725949808|ref|YP_009100543.1|;gi|678223444|gb|AIM50584.1|	98.24	99.32	737	13	0	1	737	1	737	0	1496	rIIA protein [Shigella phage Shf125875]
ORF028	gi|642905971|ref|YP_009037502.1|;gi|642904125|gb|AIA80145.1|	94.71	97.15	737	39	0	1	737	1	737	0	1421	rIIA protector from prophage-induced early lysis [Escherichia phage vB_EcoM_JS09]
ORF028	gi|682124281|ref|YP_009056593.1|;gi|604671716|gb|AHV82710.1|	93.62	96.61	737	47	0	1	737	1	737	0	1410	rIIA protein [Escherichia phage vB_EcoM_PhAPEC2]
ORF028	gi|32453485|ref|NP_861691.1|;gi|32350304|gb|AAP75903.1|	93.22	96.2	737	50	0	1	737	1	737	0	1405	rIIA protector from prophage-induced early lysis [Enterobacteria phage RB69]
ORF028	gi|422934141|ref|YP_007004177.1|;gi|345450650|gb|AEN93853.1|	51.34	71.24	744	346	10	1	736	1	736	0	771	rIIA protector from prophage-induced early lysis [Enterobacteria phage Bp7]
ORF028	gi|729030033|gb|AIZ01788.1|	50.54	71.37	744	352	9	1	736	1	736	0	769	rIIA protein [Enterobacteria phage vB_EcoM_VR5]
ORF028	gi|161622382|ref|YP_001595130.1|;gi|160213688|gb|ABX11027.1|	51.34	71.24	744	346	10	1	736	1	736	0	760	rIIA protector from prophage-induced early lysis [Enterobacteria phage JS98]
ORF028	gi|238695157|ref|YP_002922350.1|;gi|220029293|gb|ACL78227.1|	51.48	71.1	744	345	10	1	736	1	736	0	759	rIIA protector from prophage-induced early lysis [Enterobacteria phage JS10]
ORF028	gi|299778957|ref|YP_003734151.1|;gi|298105686|gb|ADI55330.1|	50.54	70.83	744	352	9	1	736	5	740	0	756	rIIA gene product [Enterobacteria phage IME08]
ORF028	gi|729030305|gb|AIZ02059.1|	49.8	68.59	745	361	7	1	736	1	741	0	746	protector from prophage-induced early lysis [Enterobacteria phage vB_EcoM_VR20]
ORF029	gi|642905972|ref|YP_009037503.1|;gi|642904126|gb|AIA80146.1|	98.41	99.37	315	5	0	1	315	1	315	0	640	rIIB protector from prophage-induced early lysis [Escherichia phage vB_EcoM_JS09]
ORF029	gi|682124534|ref|YP_009056846.1|;gi|604671969|gb|AHV82963.1|	94.92	96.51	315	12	1	1	315	1	311	0	609	rIIB protector from prophage-induced early lysis [Escherichia phage vB_EcoM_PhAPEC2]
ORF029	gi|32453754|ref|NP_861963.1|;gi|32350573|gb|AAP76172.1|	94.92	95.87	315	12	1	1	315	1	311	0	608	rIIB protector from prophage-induced early lysis [Enterobacteria phage RB69]
ORF029	gi|725950073|ref|YP_009100809.1|;gi|678223709|gb|AIM50849.1|	94.29	96.51	315	14	1	1	315	1	311	0	607	anti-prophage protein [Shigella phage Shf125875]
ORF029	gi|713322575|ref|YP_009098659.1|;gi|713322861|ref|YP_009102476.1|;gi|698040678|gb|AIT73009.1|;gi|698040950|gb|AIT73280.1|;gi|698041222|gb|AIT73551.1|;gi|698041495|gb|AIT73823.1|;gi|698041768|gb|AIT74095.1|;gi|698042041|gb|AIT74367.1|;gi|698042313|gb|AIT74638.1|	65.5	81.15	313	106	2	1	313	1	311	4e-151	432	protector from prophage-induced early lysis [Enterobacteria phage RB3]
ORF029	gi|330858789|ref|YP_004415164.1|;gi|327397723|gb|AEA73225.1|	64.98	79.81	317	101	3	1	313	1	311	7e-151	431	putative protector from prophage-induced early lysis [Shigella phage Shfl2]
ORF029	gi|730984729|ref|YP_009110822.1|;gi|694817442|gb|AIS73324.1|	64.98	79.5	317	101	3	1	313	1	311	2e-150	430	gp15 [Shigella phage pSs-1]
ORF029	gi|9632818|ref|NP_049889.1|;gi|712915109|ref|YP_009102746.1|;gi|731153|sp|P03691.3|VR2B_BPT4;gi|5354442|gb|AAD42649.1|AF158101_236;gi|2648162|dbj|BAA23635.1|;gi|299780635|gb|ADJ39997.1|;gi|397134290|gb|AFO10797.1|;gi|525334540|gb|AGR46222.1|;gi|628971804|gb|AHY83525.1|;gi|628972004|gb|AHY83724.1|;gi|698042861|gb|AIT75184.1|;gi|698043138|gb|AIT75460.1|	65.18	80.83	313	107	2	1	313	1	311	2e-150	430	rIIB protector from prophage-induced early lysis [Enterobacteria phage T4]
ORF029	gi|116326492|ref|YP_803212.1|;gi|115344085|gb|ABI95094.1|;gi|698042588|gb|AIT74912.1|	65.18	80.83	313	107	2	1	313	1	311	2e-150	430	rIIB membrane-associated protein [Enterobacteria phage RB32]
ORF029	gi|587757379|gb|AHK11112.1|	64.98	79.5	317	101	3	1	313	1	311	2e-150	430	protector from prophage-induced early lysis [Escherichia phage HY01]
ORF030	gi|32453753|ref|NP_861962.1|;gi|32350572|gb|AAP76171.1|;gi|815007509|gb|AKE45286.1|;gi|815007986|gb|AKE45760.1|;gi|815009216|gb|AKE46983.1|	100	100	95	0	0	1	95	1	95	2e-64	194	RB69ORF272c hypothetical protein [Enterobacteria phage RB69]
ORF030	gi|642905973|ref|YP_009037504.1|;gi|642904127|gb|AIA80147.1|	98.95	98.95	95	1	0	1	95	1	95	7e-64	192	hypothetical protein JS09_0181 [Escherichia phage vB_EcoM_JS09]
ORF030	gi|682124533|ref|YP_009056845.1|;gi|604671968|gb|AHV82962.1|	98.95	98.95	95	1	0	1	95	1	95	1e-63	192	hypothetical protein PhAPEC2_253 [Escherichia phage vB_EcoM_PhAPEC2]
ORF030	gi|725950072|ref|YP_009100808.1|;gi|678223708|gb|AIM50848.1|	97.89	97.89	95	2	0	1	95	1	95	2e-63	191	hypothetical protein [Shigella phage Shf125875]
ORF030	gi|311993270|ref|YP_004010136.1|;gi|284178108|gb|ADB81774.1|	74.19	78.49	93	24	0	1	93	1	93	1e-44	143	hypothetical protein CC31p278 [Enterobacteria phage CC31]
ORF030	gi|422934144|ref|YP_007004180.1|;gi|345450653|gb|AEN93856.1|	62.5	72.92	96	33	2	1	93	1	96	4e-33	114	hypothetical protein EpBp7_0139 [Enterobacteria phage Bp7]
ORF030	gi|314121852|ref|YP_004063971.1|;gi|313151609|gb|ADR32665.1|;gi|729030882|gb|AIZ02635.1|	59.04	74.7	83	31	2	1	80	1	83	2e-28	102	hypothetical protein VR7_gp290 [Enterobacteria phage vB_EcoM-VR7]
ORF030	gi|308814633|ref|YP_003934907.1|;gi|308206225|gb|ADO19624.1|	59.04	73.49	83	31	2	1	80	1	83	1e-27	100	hypothetical protein SP18_gp284 [Shigella phage SP18]
ORF030	gi|639438579|ref|YP_009030321.1|;gi|625370652|gb|AHY25512.1|	46.05	59.21	76	38	1	2	74	3	78	2e-14	65.9	hypothetical protein PS2_274 [Serratia phage PS2]
ORF030	gi|587757377|gb|AHK11110.1|	34.55	51.82	110	55	4	1	95	1	108	2e-12	60.5	hypothetical protein HY01_0255 [Escherichia phage HY01]
ORF031	gi|725950071|ref|YP_009100807.1|;gi|678223707|gb|AIM50847.1|	99.37	100	158	1	0	1	158	28	185	4e-115	328	endonuclease IV [Shigella phage Shf125875]
ORF031	gi|642905974|ref|YP_009037505.1|;gi|642904128|gb|AIA80148.1|	99.37	100	158	1	0	1	158	1	158	2e-114	325	DenB [Escherichia phage vB_EcoM_JS09]
ORF031	gi|682124532|ref|YP_009056844.1|;gi|604671967|gb|AHV82961.1|	96.84	98.1	158	5	0	1	158	28	185	3e-111	318	DNA endonuclease IV [Escherichia phage vB_EcoM_PhAPEC2]
ORF031	gi|32453752|ref|NP_861961.1|;gi|32350571|gb|AAP76170.1|	94.3	96.2	158	9	0	1	158	1	158	2e-107	308	DenB DNA endonuclease IV [Enterobacteria phage RB69]
ORF031	gi|398313819|emb|CCI89166.1|	73.42	86.71	158	42	0	1	158	28	185	1e-87	259	protein of unknown function [Yersinia phage phiD1]
ORF031	gi|525334538|gb|AGR46220.1|	73.42	87.34	158	42	0	1	158	28	185	2e-87	258	DNA endonuclease IV [Yersinia phage PST]
ORF031	gi|228861203|ref|YP_002854226.1|;gi|227438877|gb|ACP31189.1|;gi|698043413|gb|AIT75734.1|	73.42	87.34	158	42	0	1	158	28	185	2e-87	258	endonuclease IV [Enterobacteria phage RB51]
ORF031	gi|116326489|ref|YP_803209.1|;gi|115344082|gb|ABI95091.1|;gi|698042585|gb|AIT74909.1|	73.42	87.34	158	42	0	1	158	28	185	2e-87	258	endonuclease IV [Enterobacteria phage RB32]
ORF031	gi|9632728|ref|NP_049887.1|;gi|729420|sp|P39250.1|END4_BPT4;gi|5354352|gb|AAD42559.1|AF158101_146;gi|299780633|gb|ADJ39995.1|;gi|628971839|gb|AHY83560.1|;gi|628972036|gb|AHY83756.1|;gi|698042859|gb|AIT75182.1|;gi|698043136|gb|AIT75458.1|	73.42	87.34	158	42	0	1	158	28	185	3e-87	258	DenB DNA endonuclease IV [Enterobacteria phage T4]
ORF031	gi|228861586|ref|YP_002854607.1|;gi|227438602|gb|ACP30915.1|	73.42	86.71	158	42	0	1	158	28	185	3e-87	258	endonuclease IV [Enterobacteria phage RB14]
ORF032	gi|725950070|ref|YP_009100806.1|;gi|678223706|gb|AIM50846.1|	98.85	100	87	1	0	1	87	1	87	9e-59	179	hypothetical protein [Shigella phage Shf125875]
ORF032	gi|32453751|ref|NP_861960.1|;gi|32350570|gb|AAP76169.1|;gi|815007511|gb|AKE45288.1|;gi|815007984|gb|AKE45758.1|;gi|815009218|gb|AKE46985.1|	97.7	98.85	87	2	0	1	87	1	87	6e-58	177	RB69ORF270c hypothetical protein [Enterobacteria phage RB69]
ORF032	gi|642905975|ref|YP_009037506.1|;gi|682124531|ref|YP_009056843.1|;gi|604671966|gb|AHV82960.1|;gi|642904129|gb|AIA80149.1|	97.7	98.85	87	2	0	1	87	1	87	7e-58	177	hypothetical protein JS09_0183 [Escherichia phage vB_EcoM_JS09]
ORF032	gi|228861202|ref|YP_002854225.1|;gi|227438876|gb|ACP31188.1|	68.97	82.76	87	27	0	1	87	1	87	8e-40	130	hypothetical protein RB51ORF272 [Enterobacteria phage RB51]
ORF032	gi|698043412|gb|AIT75733.1|	68.97	82.76	87	27	0	1	87	34	120	1e-39	131	hypothetical protein RB68_273 [Enterobacteria phage RB68]
ORF032	gi|228861584|ref|YP_002854605.1|;gi|712915105|ref|YP_009102742.1|;gi|227438600|gb|ACP30913.1|;gi|397134286|gb|AFO10793.1|	67.82	81.61	87	28	0	1	87	1	87	5e-39	128	hypothetical protein RB14ORF269 [Enterobacteria phage RB14]
ORF032	gi|422935051|ref|YP_007005011.1|;gi|730984725|ref|YP_009110818.1|;gi|291290491|dbj|BAI83286.1|;gi|343177605|gb|AEM00931.1|;gi|398313818|emb|CCI89165.1|;gi|694817438|gb|AIS73320.1|;gi|815008238|gb|AKE46011.1|	67.82	81.61	87	28	0	1	87	1	87	9e-39	128	hypothetical phage protein [Escherichia phage wV7]
ORF032	gi|414086640|ref|YP_006986829.1|;gi|383396421|gb|AFH20237.1|	67.82	81.61	87	28	0	1	87	34	120	1e-38	129	hypothetical protein ACG-C40_0269 [Enterobacteria phage vB_EcoM_ACG-C40]
ORF032	gi|587757375|gb|AHK11108.1|	66.67	81.61	87	29	0	1	87	1	87	2e-38	127	hypothetical protein HY01_0253 [Escherichia phage HY01]
ORF032	gi|525334536|gb|AGR46218.1|	66.67	80.46	87	29	0	1	87	1	87	3e-38	127	hypothetical protein [Yersinia phage PST]
ORF033	gi|642905976|ref|YP_009037507.1|;gi|642904130|gb|AIA80150.1|;gi|815007983|gb|AKE45757.1|	97.22	97.22	36	1	0	1	36	1	36	9e-18	70.9	hypothetical protein JS09_0184 [Escherichia phage vB_EcoM_JS09]
ORF033	gi|410492079|ref|YP_006907265.1|;gi|407437668|gb|AFU20428.1|	94.44	97.22	36	2	0	1	36	1	36	2e-17	69.7	hypothetical protein HX01_0182 [Enterobacteria phage HX01]
ORF033	gi|725950069|ref|YP_009100805.1|;gi|678223705|gb|AIM50845.1|	94.44	97.22	36	2	0	1	36	1	36	3e-17	69.7	hypothetical protein [Shigella phage Shf125875]
ORF034	gi|642905977|ref|YP_009037508.1|;gi|642904131|gb|AIA80151.1|	98.48	98.48	66	1	0	1	66	1	66	2e-42	135	hypothetical protein JS09_0185 [Escherichia phage vB_EcoM_JS09]
ORF034	gi|32453750|ref|NP_861959.1|;gi|32350569|gb|AAP76168.1|;gi|815007513|gb|AKE45290.1|;gi|815007982|gb|AKE45756.1|;gi|815009220|gb|AKE46987.1|	96.97	96.97	66	2	0	1	66	1	66	1e-41	134	Ndd.1 conserved hypothetical protein [Enterobacteria phage RB69]
ORF034	gi|682124530|ref|YP_009056842.1|;gi|725950068|ref|YP_009100804.1|;gi|604671965|gb|AHV82959.1|;gi|678223704|gb|AIM50844.1|	96.97	98.48	66	2	0	1	66	1	66	1e-41	134	hypothetical protein PhAPEC2_250 [Escherichia phage vB_EcoM_PhAPEC2]
ORF034	gi|729030298|gb|AIZ02053.1|	52.94	69.12	68	25	2	3	63	2	69	2e-15	67	hypothetical protein VR5_266 [Enterobacteria phage vB_EcoM_VR5]
ORF034	gi|238695414|ref|YP_002922607.1|;gi|220029550|gb|ACL78484.1|	50	66.18	68	27	2	3	63	2	69	3e-14	63.9	Ndd.1 conserved hypothetical protein [Enterobacteria phage JS10]
ORF034	gi|729031166|gb|AIZ02918.1|	50	66.18	68	27	2	3	63	2	69	4e-14	63.9	hypothetical protein VR26_281 [Enterobacteria phage vB_EcoM_VR26]
ORF034	gi|161622528|ref|YP_001595388.1|;gi|160213834|gb|ABX11173.1|	50	66.18	68	27	2	3	63	2	69	6e-14	63.2	Ndd.1 conserved hypothetical protein [Enterobacteria phage JS98]
ORF034	gi|308814627|ref|YP_003934901.1|;gi|308206219|gb|ADO19618.1|	50	66.18	68	27	2	3	63	2	69	8e-14	62.8	hypothetical protein SP18_gp278 [Shigella phage SP18]
ORF034	gi|729030581|gb|AIZ02335.1|	50	67.65	68	27	2	3	63	2	69	8e-14	62.8	hypothetical protein VR20_277 [Enterobacteria phage vB_EcoM_VR20]
ORF034	gi|314121846|ref|YP_004063965.1|;gi|313151603|gb|ADR32659.1|;gi|729030875|gb|AIZ02628.1|	50	66.18	68	27	2	3	63	2	69	8e-14	62.8	Ndd.1 conserved hypothetical protein [Enterobacteria phage vB_EcoM-VR7]
ORF035	gi|642905978|ref|YP_009037509.1|;gi|682124529|ref|YP_009056841.1|;gi|604671964|gb|AHV82958.1|;gi|642904132|gb|AIA80152.1|;gi|815007514|gb|AKE45291.1|;gi|815007981|gb|AKE45755.1|;gi|815009221|gb|AKE46988.1|	100	100	148	0	0	1	148	1	148	2e-106	305	nucleoid disruption protein [Escherichia phage vB_EcoM_JS09]
ORF035	gi|725950067|ref|YP_009100803.1|;gi|678223703|gb|AIM50843.1|	99.32	100	148	1	0	1	148	1	148	7e-106	303	nucleoid disruption protein [Shigella phage Shf125875]
ORF035	gi|32453749|ref|NP_861958.1|;gi|32350568|gb|AAP76167.1|	97.97	100	148	3	0	1	148	1	148	9e-105	300	Ndd nucleoid disruption protein [Enterobacteria phage RB69]
ORF035	gi|299779204|ref|YP_003734398.1|;gi|298105933|gb|ADI55577.1|	61.74	79.87	149	56	1	1	148	3	151	3e-64	197	ndd gene product [Enterobacteria phage IME08]
ORF035	gi|422934148|ref|YP_007004184.1|;gi|345450657|gb|AEN93860.1|	61.74	79.87	149	56	1	1	148	1	149	3e-64	197	nucleoid disruption protein [Enterobacteria phage Bp7]
ORF035	gi|161622527|ref|YP_001595387.1|;gi|160213833|gb|ABX11172.1|	61.74	79.19	149	56	1	1	148	1	149	5e-64	197	Ndd nucleoid disruption protein [Enterobacteria phage JS98]
ORF035	gi|764447522|ref|WP_044370112.1|;gi|589890016|ref|YP_009005552.1|;gi|583927929|gb|AHI61191.1|	64.86	72.3	148	52	0	1	148	1	148	5e-64	197	nucleoid disruption protein [Enterobacter phage PG7]
ORF035	gi|238695413|ref|YP_002922606.1|;gi|220029549|gb|ACL78483.1|	61.07	79.19	149	57	1	1	148	1	149	2e-63	196	Ndd nucleoid disruption protein [Enterobacteria phage JS10]
ORF035	gi|311993266|ref|YP_004010132.1|;gi|284178104|gb|ADB81770.1|	63.51	72.3	148	54	0	1	148	1	148	6e-63	194	nucleoid disruption protein [Enterobacteria phage CC31]
ORF035	gi|308814625|ref|YP_003934899.1|;gi|308206217|gb|ADO19616.1|	61.07	76.51	149	57	1	1	148	1	149	1e-62	194	nucleoid disruption protein [Shigella phage SP18]
ORF036	gi|32453748|ref|NP_861957.1|;gi|32350567|gb|AAP76166.1|	100	100	48	0	0	1	48	1	48	3e-26	93.2	Ac acridine resistance protein [Enterobacteria phage RB69]
ORF036	gi|410492080|ref|YP_006907266.1|;gi|642905979|ref|YP_009037510.1|;gi|407437669|gb|AFU20429.1|;gi|642904133|gb|AIA80153.1|	100	100	48	0	0	1	48	1	48	4e-26	93.2	hypothetical protein HX01_0184 [Enterobacteria phage HX01]
ORF036	gi|725950066|ref|YP_009100802.1|;gi|678223702|gb|AIM50842.1|	97.92	100	48	1	0	1	48	1	48	8e-26	92.4	acridine resistance protein [Shigella phage Shf125875]
ORF036	gi|116326480|ref|YP_803200.1|;gi|115344073|gb|ABI95082.1|;gi|698042574|gb|AIT74898.1|	70.27	81.08	37	11	0	6	42	7	43	3e-10	52	acridine resistance protein [Enterobacteria phage RB32]
ORF036	gi|228861194|ref|YP_002854217.1|;gi|227438868|gb|ACP31180.1|;gi|698043402|gb|AIT75723.1|	62.16	78.38	37	14	0	6	42	7	43	5e-10	51.6	acridine resistance protein [Enterobacteria phage RB51]
ORF036	gi|712915099|ref|YP_009102736.1|;gi|730984719|ref|YP_009110812.1|;gi|397134280|gb|AFO10787.1|;gi|525334530|gb|AGR46212.1|;gi|694817432|gb|AIS73314.1|	56.76	75.68	37	16	0	6	42	7	43	3e-08	46.6	hypothetical protein ECML134_261 [Escherichia phage ECML-134]
ORF036	gi|330858779|ref|YP_004415154.1|;gi|327397713|gb|AEA73215.1|	56.76	72.97	37	16	0	6	42	7	43	1e-07	45.1	hypothetical protein Shfl2p266 [Shigella phage Shfl2]
ORF036	gi|422935044|ref|YP_007005004.1|;gi|343177598|gb|AEM00924.1|	65.52	79.31	29	10	0	6	34	7	35	2e-07	45.1	acridine resistance protein [Escherichia phage wV7]
ORF036	gi|291290485|dbj|BAI83280.1|	40	62.86	35	21	0	5	39	9	43	0.027	30.4	acridine resistance protein [Enterobacteria phage AR1]
ORF036	gi|161622525|ref|YP_001595385.1|;gi|160213831|gb|ABX11170.1|	42.42	66.67	33	19	0	11	43	12	44	0.068	29.3	hypothetical protein EpJS98_gp256 [Enterobacteria phage JS98]
ORF037	gi|682124528|ref|YP_009056840.1|;gi|604671963|gb|AHV82957.1|	100	100	46	0	0	1	46	1	46	5e-23	85.1	hypothetical protein PhAPEC2_248 [Escherichia phage vB_EcoM_PhAPEC2]
ORF037	gi|228861193|ref|YP_002854216.1|;gi|227438867|gb|ACP31179.1|;gi|698043401|gb|AIT75722.1|	69.57	82.61	46	14	0	1	46	1	46	6e-14	61.6	gp52.1 hypothetical protein [Enterobacteria phage RB51]
ORF037	gi|32453747|ref|NP_861956.1|;gi|32350566|gb|AAP76165.1|	93.48	95.65	46	3	0	1	46	1	46	1e-13	60.8	gp52.1 conserved hypothetical predicted membrane protein [Enterobacteria phage RB69]
ORF037	gi|116326479|ref|YP_803199.1|;gi|115344072|gb|ABI95081.1|;gi|698042573|gb|AIT74897.1|	67.39	78.26	46	15	0	1	46	1	46	2e-13	60.1	hypothetical protein RB32ORF257c [Enterobacteria phage RB32]
ORF037	gi|725950065|ref|YP_009100801.1|;gi|678223701|gb|AIM50841.1|	91.3	95.65	46	4	0	1	46	1	46	7e-13	58.9	hypothetical protein [Shigella phage Shf125875]
ORF037	gi|9632695|ref|NP_049876.1|;gi|422935043|ref|YP_007005003.1|;gi|113330|sp|P18922.1|Y16J_BPT4;gi|5354319|gb|AAD42526.1|AF158101_113;gi|299780623|gb|ADJ39985.1|;gi|343177597|gb|AEM00923.1|;gi|628971972|gb|AHY83693.1|;gi|628972161|gb|AHY83881.1|;gi|698042849|gb|AIT75172.1|;gi|698043125|gb|AIT75447.1|	71.74	78.26	46	13	0	1	46	1	46	2e-11	55.1	gp52.1 conserved hypothetical predicted membrane protein [Enterobacteria phage T4]
ORF037	gi|228861575|ref|YP_002854596.1|;gi|713322563|ref|YP_009098647.1|;gi|713322848|ref|YP_009102463.1|;gi|227438591|gb|ACP30904.1|;gi|698040666|gb|AIT72997.1|;gi|698040938|gb|AIT73268.1|;gi|698041210|gb|AIT73539.1|;gi|698041482|gb|AIT73810.1|;gi|698041755|gb|AIT74082.1|;gi|698042029|gb|AIT74355.1|;gi|698042300|gb|AIT74625.1|	71.74	78.26	46	13	0	1	46	1	46	2e-11	55.1	gp52.1 hypothetical protein [Enterobacteria phage RB14]
ORF037	gi|299779203|ref|YP_003734397.1|;gi|422934150|ref|YP_007004186.1|;gi|298105932|gb|ADI55576.1|;gi|345450659|gb|AEN93862.1|	71.74	76.09	46	13	0	1	46	1	46	3e-11	54.7	52.1 gene product [Enterobacteria phage IME08]
ORF037	gi|414086633|ref|YP_006986822.1|;gi|383396414|gb|AFH20230.1|	69.57	80.43	46	14	0	1	46	1	46	3e-11	54.7	hypothetical protein ACG-C40_0264a [Enterobacteria phage vB_EcoM_ACG-C40]
ORF037	gi|238695411|ref|YP_002922604.1|;gi|220029547|gb|ACL78481.1|	71.74	78.26	46	13	0	1	46	1	46	4e-11	54.3	gp52.1 conserved hypothetical predicted membrane protein [Enterobacteria phage JS10]
ORF038	gi|642905980|ref|YP_009037511.1|;gi|642904134|gb|AIA80154.1|	99.77	100	441	1	0	1	441	1	441	0	909	DNA topoisomerase II medium subunit [Escherichia phage vB_EcoM_JS09]
ORF038	gi|32453746|ref|NP_861955.1|;gi|32350565|gb|AAP76164.1|	99.32	100	441	3	0	1	441	1	441	0	906	DNA topisomerase II medium subunit [Enterobacteria phage RB69]
ORF038	gi|682124527|ref|YP_009056839.1|;gi|604671962|gb|AHV82956.1|	99.32	100	441	3	0	1	441	1	441	0	905	topoisomerase II subunit [Escherichia phage vB_EcoM_PhAPEC2]
ORF038	gi|725950064|ref|YP_009100800.1|;gi|678223700|gb|AIM50840.1|	98.64	99.77	441	6	0	1	441	1	441	0	903	topoisomerase II subunit [Shigella phage Shf125875]
ORF038	gi|422935042|ref|YP_007005002.1|;gi|343177596|gb|AEM00922.1|;gi|815008231|gb|AKE46004.1|	88.66	94.78	441	50	0	1	441	1	441	0	790	topoisomerase II medium subunit [Escherichia phage wV7]
ORF038	gi|291290484|dbj|BAI83279.1|	88.44	94.78	441	51	0	1	441	1	441	0	789	topoisomerase II medium subunit [Enterobacteria phage AR1]
ORF038	gi|525334529|gb|AGR46211.1|	88.44	94.78	441	51	0	1	441	1	441	0	788	topoisomerase II medium subunit [Yersinia phage PST]
ORF038	gi|228861192|ref|YP_002854215.1|;gi|639438916|ref|YP_009030873.1|;gi|713322562|ref|YP_009098646.1|;gi|713322847|ref|YP_009102462.1|;gi|730984717|ref|YP_009110810.1|;gi|227438866|gb|ACP31178.1|;gi|628971744|gb|AHY83466.1|;gi|694817430|gb|AIS73312.1|;gi|698040665|gb|AIT72996.1|;gi|698040937|gb|AIT73267.1|;gi|698041209|gb|AIT73538.1|;gi|698041481|gb|AIT73809.1|;gi|698041754|gb|AIT74081.1|;gi|6980420…	88.44	94.78	441	51	0	1	441	1	441	0	788	gp52 DNA topoisomerase subunit [Enterobacteria phage RB51]
ORF038	gi|228861574|ref|YP_002854595.1|;gi|227438590|gb|ACP30903.1|	88.44	94.78	441	51	0	1	441	1	441	0	788	gp52 DNA topoisomerase subunit [Enterobacteria phage RB14]
ORF038	gi|330858778|ref|YP_004415153.1|;gi|422934675|ref|YP_007004636.1|;gi|327397712|gb|AEA73214.1|;gi|339791458|gb|AEK12515.1|	88.21	94.78	441	52	0	1	441	1	441	0	787	putative DNA topoisomerase subunit [Shigella phage Shfl2]
ORF039	gi|642905981|ref|YP_009037512.1|;gi|642904135|gb|AIA80155.1|	100	100	71	0	0	1	71	1	71	2e-44	141	hypothetical protein JS09_0189 [Escherichia phage vB_EcoM_JS09]
ORF039	gi|682124526|ref|YP_009056838.1|;gi|604671961|gb|AHV82955.1|	98.59	98.59	71	1	0	1	71	1	71	2e-43	139	hypothetical protein PhAPEC2_246 [Escherichia phage vB_EcoM_PhAPEC2]
ORF039	gi|410492081|ref|YP_006907267.1|;gi|407437670|gb|AFU20430.1|	98.59	98.59	71	1	0	1	71	1	71	3e-43	138	hypothetical protein HX01_0187 [Enterobacteria phage HX01]
ORF039	gi|725950063|ref|YP_009100799.1|;gi|678223699|gb|AIM50839.1|	97.18	97.18	71	2	0	1	71	1	71	5e-42	135	hypothetical protein [Shigella phage Shf125875]
ORF039	gi|161622522|ref|YP_001595382.1|;gi|160213828|gb|ABX11167.1|	74.65	84.51	71	18	0	1	71	1	71	1e-30	106	hypothetical protein EpJS98_gp253 [Enterobacteria phage JS98]
ORF039	gi|422934152|ref|YP_007004188.1|;gi|345450661|gb|AEN93864.1|	74.65	83.1	71	18	0	1	71	1	71	5e-30	104	hypothetical protein EpBp7_0147 [Enterobacteria phage Bp7]
ORF039	gi|299779201|ref|YP_003734395.1|;gi|298105930|gb|ADI55574.1|	73.24	83.1	71	19	0	1	71	7	77	9e-30	104	unnamed protein product [Enterobacteria phage IME08]
ORF039	gi|729030292|gb|AIZ02047.1|	71.83	81.69	71	20	0	1	71	1	71	3e-28	100	hypothetical protein VR5_260 [Enterobacteria phage vB_EcoM_VR5]
ORF039	gi|408386938|gb|AFU63947.1|	38.46	58.97	39	24	0	15	53	11	49	0.001	35	hypothetical protein [Salmonella phage STML-198]
ORF039	gi|764161796|ref|YP_009126206.1|;gi|586881433|gb|AHJ86853.1|	38.46	58.97	39	24	0	15	53	25	63	0.001	35	hypothetical protein D26_0072 [Salmonella phage STP4-a]
ORF040	gi|32453745|ref|NP_861954.1|;gi|682124525|ref|YP_009056837.1|;gi|32350564|gb|AAP76163.1|;gi|604671960|gb|AHV82954.1|;gi|815007518|gb|AKE45295.1|;gi|815007977|gb|AKE45751.1|;gi|815009225|gb|AKE46992.1|	98.57	100	210	3	0	1	210	1	210	7e-148	415	MotA activator of middle period transcription [Enterobacteria phage RB69]
ORF040	gi|725950062|ref|YP_009100798.1|;gi|678223698|gb|AIM50838.1|	98.1	100	210	4	0	1	210	1	210	4e-147	413	middle transcription regulator [Shigella phage Shf125875]
ORF040	gi|642905982|ref|YP_009037513.1|;gi|642904136|gb|AIA80156.1|	98.1	99.52	210	4	0	1	210	1	210	6e-147	412	activator of middle period transcription [Escherichia phage vB_EcoM_JS09]
ORF040	gi|238695408|ref|YP_002922601.1|;gi|220029544|gb|ACL78478.1|	69.05	85.24	210	65	0	1	210	1	210	3e-103	302	MotA activator of middle period transcription [Enterobacteria phage JS10]
ORF040	gi|299779200|ref|YP_003734394.1|;gi|298105929|gb|ADI55573.1|	69.05	85.24	210	65	0	1	210	26	235	5e-103	302	motA gene product [Enterobacteria phage IME08]
ORF040	gi|161622521|ref|YP_001595381.1|;gi|160213827|gb|ABX11166.1|	68.57	85.24	210	66	0	1	210	1	210	8e-103	301	MotA activator of middle period transcription [Enterobacteria phage JS98]
ORF040	gi|729030291|gb|AIZ02046.1|	68.57	85.24	210	66	0	1	210	1	210	1e-102	300	activator of middle transcription [Enterobacteria phage vB_EcoM_VR5]
ORF040	gi|431809196|ref|YP_007236093.1|;gi|398313485|emb|CCI88834.1|	55.77	72.6	208	89	2	1	207	11	216	1e-70	219	Phage transcriptional regulator of middle promoters [Yersinia phage phiR1-RT]
ORF040	gi|746946642|gb|AJD82070.1|	55.29	72.12	208	90	2	1	207	1	206	9e-70	216	transcriptional regulator [Yersinia phage vB_YenM_TG1]
ORF040	gi|422934154|ref|YP_007004190.1|;gi|345450663|gb|AEN93866.1|	66.43	82.14	140	47	0	71	210	1	140	1e-62	196	activator of middle period transcription [Enterobacteria phage Bp7]
ORF041	gi|725950061|ref|YP_009100797.1|;gi|678223697|gb|AIM50837.1|;gi|815007519|gb|AKE45296.1|;gi|815007976|gb|AKE45750.1|;gi|815009226|gb|AKE46993.1|	99.08	99.08	109	1	0	1	109	1	109	1e-75	223	hypothetical protein [Shigella phage Shf125875]
ORF041	gi|32453744|ref|NP_861953.1|;gi|32350563|gb|AAP76162.1|	97.25	98.17	109	3	0	1	109	1	109	2e-74	220	Arn.4 conserved hypothetical protein [Enterobacteria phage RB69]
ORF041	gi|682124524|ref|YP_009056836.1|;gi|604671959|gb|AHV82953.1|	86.84	92.11	114	10	1	1	109	1	114	6e-67	201	hypothetical protein PhAPEC2_244 [Escherichia phage vB_EcoM_PhAPEC2]
ORF041	gi|410492082|ref|YP_006907268.1|;gi|407437671|gb|AFU20431.1|	86.84	92.11	114	10	1	1	109	1	114	6e-67	201	hypothetical protein HX01_0189 [Enterobacteria phage HX01]
ORF041	gi|642905983|ref|YP_009037514.1|;gi|642904137|gb|AIA80157.1|	83.33	91.23	114	14	1	1	109	1	114	1e-65	198	hypothetical protein JS09_0191 [Escherichia phage vB_EcoM_JS09]
ORF041	gi|525334526|gb|AGR46208.1|	80.73	89.91	109	21	0	1	109	1	109	6e-64	194	hypothetical protein [Yersinia phage PST]
ORF041	gi|228861571|ref|YP_002854592.1|;gi|330858775|ref|YP_004415150.1|;gi|227438587|gb|ACP30900.1|;gi|327397709|gb|AEA73211.1|	80.73	89.91	109	21	0	1	109	1	109	2e-63	192	arn.4 hypothetical protein [Enterobacteria phage RB14]
ORF041	gi|422934672|ref|YP_007004633.1|;gi|422935039|ref|YP_007004999.1|;gi|639438913|ref|YP_009030870.1|;gi|712915094|ref|YP_009102731.1|;gi|730984980|ref|YP_009111073.1|;gi|299780619|gb|ADJ39981.1|;gi|339791455|gb|AEK12512.1|;gi|343177593|gb|AEM00919.1|;gi|397134275|gb|AFO10782.1|;gi|628971741|gb|AHY83463.1|;gi|694817693|gb|AIS73575.1|;gi|698042845|gb|AIT75168.1|;gi|698043121|gb|AIT75443.1|;gi|8150082…	79.82	89.91	109	22	0	1	109	1	109	2e-63	192	conserved hypothetical protein [Enterobacteria phage ime09]
ORF041	gi|422934155|ref|YP_007004191.1|;gi|345450664|gb|AEN93867.1|	79.82	91.74	109	22	0	1	109	1	109	3e-63	192	conserved hypothetical protein [Enterobacteria phage Bp7]
ORF041	gi|291290481|dbj|BAI83276.1|;gi|587757369|gb|AHK11102.1|	78.9	89.91	109	23	0	1	109	1	109	6e-63	191	conserved hypothetical protein [Enterobacteria phage AR1]
ORF042	gi|642905984|ref|YP_009037515.1|;gi|642904138|gb|AIA80158.1|	99.35	100	153	1	0	1	153	1	153	4e-111	317	hypothetical protein JS09_0192 [Escherichia phage vB_EcoM_JS09]
ORF042	gi|228861188|ref|YP_002854211.1|;gi|227438862|gb|ACP31174.1|;gi|698043396|gb|AIT75717.1|	96.73	98.69	153	5	0	1	153	1	153	6e-109	311	arn.3 hypothetical protein [Enterobacteria phage RB51]
ORF042	gi|712915093|ref|YP_009102730.1|;gi|397134274|gb|AFO10781.1|	84.31	90.2	153	24	0	1	153	1	153	1e-93	272	hypothetical protein ECML134_255 [Escherichia phage ECML-134]
ORF042	gi|639438912|ref|YP_009030869.1|;gi|628971740|gb|AHY83462.1|	83.66	90.2	153	25	0	1	153	1	153	2e-93	272	hypothetical protein e112_274 [Escherichia phage e11/2]
ORF042	gi|398313806|emb|CCI89153.1|	84.31	89.54	153	24	0	1	153	1	153	2e-93	272	protein of unknown function [Yersinia phage phiD1]
ORF042	gi|422935038|ref|YP_007004998.1|;gi|343177592|gb|AEM00918.1|;gi|815008227|gb|AKE46000.1|	83.66	90.2	153	25	0	1	153	1	153	2e-93	272	hypothetical protein [Escherichia phage wV7]
ORF042	gi|730984979|ref|YP_009111072.1|;gi|694817692|gb|AIS73574.1|	83.66	90.2	153	25	0	1	153	1	153	3e-93	272	hypothetical protein pSs1_00264 [Shigella phage pSs-1]
ORF042	gi|525334525|gb|AGR46207.1|	83.66	90.2	153	25	0	1	153	1	153	4e-93	271	hypothetical protein [Yersinia phage PST]
ORF042	gi|587757368|gb|AHK11101.1|	83.66	90.2	153	25	0	1	153	1	153	5e-93	271	hypothetical protein HY01_0246 [Escherichia phage HY01]
ORF042	gi|330858774|ref|YP_004415149.1|;gi|327397708|gb|AEA73210.1|	83.01	90.2	153	26	0	1	153	1	153	1e-92	270	hypothetical protein Shfl2p261 [Shigella phage Shfl2]
ORF043	gi|642905985|ref|YP_009037516.1|;gi|642904139|gb|AIA80159.1|	98.92	98.92	93	1	0	1	93	1	93	2e-63	191	hypothetical protein JS09_0193 [Escherichia phage vB_EcoM_JS09]
ORF043	gi|398313805|emb|CCI89152.1|	97.85	97.85	93	2	0	1	93	1	93	1e-62	189	protein of unknown function [Yersinia phage phiD1]
ORF043	gi|410492083|ref|YP_006907269.1|;gi|725950059|ref|YP_009100795.1|;gi|407437672|gb|AFU20432.1|;gi|678223695|gb|AIM50835.1|;gi|815007521|gb|AKE45298.1|;gi|815007974|gb|AKE45748.1|;gi|815009228|gb|AKE46995.1|	91.4	93.55	93	8	0	1	93	1	93	2e-57	176	hypothetical protein HX01_0190 [Enterobacteria phage HX01]
ORF043	gi|32453742|ref|NP_861951.1|;gi|682124521|ref|YP_009056833.1|;gi|32350561|gb|AAP76160.1|;gi|604671956|gb|AHV82950.1|	90.32	93.55	93	9	0	1	93	1	93	7e-57	174	Arn.2 conserved hypothetical protein [Enterobacteria phage RB69]
ORF043	gi|729031154|gb|AIZ02906.1|	68.82	79.57	93	27	1	1	93	1	91	5e-41	134	hypothetical protein VR26_269 [Enterobacteria phage vB_EcoM_VR26]
ORF043	gi|729030288|gb|AIZ02043.1|	69.57	81.52	92	27	1	1	92	1	91	6e-40	131	hypothetical protein VR5_256 [Enterobacteria phage vB_EcoM_VR5]
ORF043	gi|729030571|gb|AIZ02325.1|	70.33	80.22	91	26	1	1	91	1	90	1e-39	130	hypothetical protein VR20_267 [Enterobacteria phage vB_EcoM_VR20]
ORF043	gi|238695404|ref|YP_002922597.1|;gi|220029540|gb|ACL78474.1|	68.48	80.43	92	28	1	1	92	1	91	2e-39	130	Arn.2 conserved hypothetical protein [Enterobacteria phage JS10]
ORF043	gi|308814618|ref|YP_003934892.1|;gi|308206210|gb|ADO19609.1|	68.13	80.22	91	27	1	1	91	1	89	4e-39	129	hypothetical protein SP18_gp269 [Shigella phage SP18]
ORF043	gi|422934158|ref|YP_007004194.1|;gi|345450667|gb|AEN93870.1|	66.3	80.43	92	30	1	1	92	1	91	1e-38	128	conserved hypothetical protein [Enterobacteria phage Bp7]
ORF044	gi|32453741|ref|NP_861950.1|;gi|32350560|gb|AAP76159.1|;gi|815007522|gb|AKE45299.1|;gi|815007973|gb|AKE45747.1|;gi|815009229|gb|AKE46996.1|	100	100	71	0	0	1	71	2	72	2e-46	146	Arn.1 conserved hypothetical protein [Enterobacteria phage RB69]
ORF044	gi|725950058|ref|YP_009100794.1|;gi|678223694|gb|AIM50834.1|	100	100	71	0	0	1	71	2	72	2e-46	146	hypothetical protein [Shigella phage Shf125875]
ORF044	gi|682124520|ref|YP_009056832.1|;gi|398313804|emb|CCI89151.1|;gi|604671955|gb|AHV82949.1|	100	100	71	0	0	1	71	1	71	2e-46	146	hypothetical protein PhAPEC2_240 [Escherichia phage vB_EcoM_PhAPEC2]
ORF044	gi|642905986|ref|YP_009037517.1|;gi|642904140|gb|AIA80160.1|	98.59	100	71	1	0	1	71	1	71	1e-45	144	hypothetical protein JS09_0194 [Escherichia phage vB_EcoM_JS09]
ORF044	gi|410492084|ref|YP_006907270.1|;gi|407437673|gb|AFU20433.1|	98.59	98.59	71	1	0	1	71	1	71	2e-45	144	hypothetical protein HX01_0192 [Enterobacteria phage HX01]
ORF044	gi|422935036|ref|YP_007004996.1|;gi|639438910|ref|YP_009030867.1|;gi|730984977|ref|YP_009111070.1|;gi|343177590|gb|AEM00916.1|;gi|628971738|gb|AHY83460.1|;gi|694817690|gb|AIS73572.1|	74.29	84.29	70	18	0	2	71	3	72	7e-32	109	hypothetical protein [Escherichia phage wV7]
ORF044	gi|729030287|gb|AIZ02042.1|	58.46	76.92	65	27	0	1	65	1	65	3e-23	87	hypothetical protein VR5_255 [Enterobacteria phage vB_EcoM_VR5]
ORF044	gi|314121833|ref|YP_004063952.1|;gi|313151590|gb|ADR32646.1|	58.46	76.92	65	27	0	1	65	1	65	3e-23	87	Arn.1 conserved hypothetical protein [Enterobacteria phage vB_EcoM-VR7]
ORF044	gi|729030862|gb|AIZ02615.1|	56.92	76.92	65	28	0	1	65	1	65	2e-22	85.1	hypothetical protein VR25_271 [Enterobacteria phage vB_EcoM_VR25]
ORF044	gi|228861567|ref|YP_002854588.1|;gi|330858772|ref|YP_004415147.1|;gi|414086624|ref|YP_006986813.1|;gi|422934669|ref|YP_007004630.1|;gi|227438583|gb|ACP30896.1|;gi|291290478|dbj|BAI83273.1|;gi|327397706|gb|AEA73208.1|;gi|339791452|gb|AEK12509.1|;gi|383396405|gb|AFH20221.1|;gi|698042565|gb|AIT74889.1|	74.42	81.4	43	11	0	29	71	1	43	6e-17	70.5	arn.1 hypothetical protein [Enterobacteria phage RB14]
ORF045	gi|642905987|ref|YP_009037518.1|;gi|642904141|gb|AIA80161.1|	100	100	39	0	0	1	39	1	39	3e-20	77.4	hypothetical protein JS09_0195 [Escherichia phage vB_EcoM_JS09]
ORF045	gi|410492085|ref|YP_006907271.1|;gi|407437674|gb|AFU20434.1|	97.44	100	39	1	0	1	39	1	39	2e-19	75.5	hypothetical protein HX01_0193 [Enterobacteria phage HX01]
ORF045	gi|161622517|ref|YP_001595377.1|;gi|308814617|ref|YP_003934891.1|;gi|160213823|gb|ABX11162.1|;gi|308206209|gb|ADO19608.1|	89.19	94.59	37	4	0	1	37	1	37	4e-16	66.6	hypothetical protein EpJS98_gp248 [Enterobacteria phage JS98]
ORF045	gi|314121832|ref|YP_004063951.1|;gi|313151589|gb|ADR32645.1|	83.78	89.19	37	6	0	1	37	1	37	2e-13	59.7	hypothetical protein VR7_gp270 [Enterobacteria phage vB_EcoM-VR7]
ORF045	gi|238695403|ref|YP_002922596.1|;gi|220029539|gb|ACL78473.1|	82.05	87.18	39	7	0	1	39	1	39	3e-13	59.7	hypothetical protein EpJS10_0247 [Enterobacteria phage JS10]
ORF045	gi|116326471|ref|YP_803191.1|;gi|228861186|ref|YP_002854209.1|;gi|228861566|ref|YP_002854587.1|;gi|414086623|ref|YP_006986812.1|;gi|422934668|ref|YP_007004629.1|;gi|422935035|ref|YP_007004995.1|;gi|639438909|ref|YP_009030866.1|;gi|713322555|ref|YP_009098639.1|;gi|713322840|ref|YP_009102455.1|;gi|730984976|ref|YP_009111069.1|;gi|115344064|gb|ABI95073.1|;gi|227438582|gb|ACP30895.1|;gi|227438860|gb|…	79.49	87.18	39	8	0	1	39	1	39	5e-13	58.9	hypothetical protein RB32ORF249c [Enterobacteria phage RB32]
ORF045	gi|330858771|ref|YP_004415146.1|;gi|327397705|gb|AEA73207.1|	79.49	84.62	39	8	0	1	39	1	39	1e-12	57.8	hypothetical protein Shfl2p258 [Shigella phage Shfl2]
ORF045	gi|589890006|ref|YP_009005542.1|;gi|583927919|gb|AHI61181.1|	72.97	81.08	37	10	0	1	37	1	37	3e-12	57	hypothetical protein PG7_278 [Enterobacter phage PG7]
ORF045	gi|712915090|ref|YP_009102727.1|;gi|397134271|gb|AFO10778.1|	76.92	84.62	39	9	0	1	39	1	39	3e-12	56.6	hypothetical protein ECML134_252 [Escherichia phage ECML-134]
ORF045	gi|746946638|gb|AJD82066.1|	75.68	86.49	37	9	0	1	37	1	37	2e-11	54.7	hypothetical protein YenMTG1_256 [Yersinia phage vB_YenM_TG1]
ORF046	gi|642905988|ref|YP_009037519.1|;gi|642904142|gb|AIA80162.1|	98.99	98.99	99	1	0	1	99	1	99	3e-67	201	hypothetical protein JS09_0196 [Escherichia phage vB_EcoM_JS09]
ORF046	gi|398313803|emb|CCI89150.1|;gi|815007523|gb|AKE45300.1|;gi|815007972|gb|AKE45746.1|;gi|815009230|gb|AKE46997.1|	97.98	97.98	99	2	0	1	99	1	99	2e-66	199	protein of unknown function [Yersinia phage phiD1]
ORF046	gi|682124519|ref|YP_009056831.1|;gi|725950057|ref|YP_009100793.1|;gi|604671954|gb|AHV82948.1|;gi|678223693|gb|AIM50833.1|	94.74	95.79	95	5	0	1	95	1	95	3e-61	186	hypothetical protein PhAPEC2_239 [Escherichia phage vB_EcoM_PhAPEC2]
ORF046	gi|32453740|ref|NP_861949.1|;gi|32350559|gb|AAP76158.1|	91.92	93.94	99	8	0	1	99	1	99	7e-61	185	RB69ORF259c hypothetical protein [Enterobacteria phage RB69]
ORF046	gi|729030861|gb|AIZ02614.1|	32.26	59.14	93	61	2	1	91	1	93	9e-10	53.1	hypothetical protein VR25_270 [Enterobacteria phage vB_EcoM_VR25]
ORF046	gi|238695402|ref|YP_002922595.1|;gi|220029538|gb|ACL78472.1|	32.26	58.06	93	61	2	1	91	1	93	1e-09	53.1	hypothetical protein EpJS10_0246 [Enterobacteria phage JS10]
ORF046	gi|729030570|gb|AIZ02324.1|	30.11	58.06	93	63	2	1	91	1	93	2e-08	49.3	hypothetical protein VR20_266 [Enterobacteria phage vB_EcoM_VR20]
ORF046	gi|768214316|gb|AJT60596.1|	29.23	47.69	65	45	1	25	89	32	95	0.85	28.9	hypothetical protein HB2014_20 [Salmonella phage HB-2014]
ORF046	gi|408385028|gb|AFU62461.1|	29.23	47.69	65	45	1	25	89	32	95	1.2	28.5	hypothetical protein [Escherichia phage EC6]
ORF046	gi|326782680|ref|YP_004322948.1|;gi|310002894|gb|ADO97293.1|	30.19	52.83	53	31	2	32	84	35	81	1.7	28.5	hypothetical protein SSM1_057 [Synechococcus phage S-SM1]
ORF047	gi|642905989|ref|YP_009037520.1|;gi|642904143|gb|AIA80163.1|	100	100	53	0	0	1	53	1	53	1e-30	104	hypothetical protein JS09_0197 [Escherichia phage vB_EcoM_JS09]
ORF047	gi|410492086|ref|YP_006907272.1|;gi|407437675|gb|AFU20435.1|	94.34	96.23	53	3	0	1	53	1	53	3e-29	101	hypothetical protein HX01_0195 [Enterobacteria phage HX01]
ORF047	gi|32453739|ref|NP_861948.1|;gi|682124518|ref|YP_009056830.1|;gi|32350558|gb|AAP76157.1|;gi|604671953|gb|AHV82947.1|	92.45	94.34	53	4	0	1	53	1	53	3e-28	99	RB69ORF258c hypothetical protein [Enterobacteria phage RB69]
ORF047	gi|725950056|ref|YP_009100792.1|;gi|678223692|gb|AIM50832.1|	90.57	94.34	53	5	0	1	53	1	53	3e-28	98.6	hypothetical protein [Shigella phage Shf125875]
ORF047	gi|398313802|emb|CCI89149.1|	90.57	92.45	53	5	0	1	53	1	53	2e-26	94.4	protein of unknown function [Yersinia phage phiD1]
ORF047	gi|422934159|ref|YP_007004195.1|;gi|345450668|gb|AEN93871.1|	41.18	49.02	51	30	0	1	51	1	51	0.0005	35.4	hypothetical protein EpBp7_0154 [Enterobacteria phage Bp7]
ORF047	gi|238695401|ref|YP_002922594.1|;gi|220029537|gb|ACL78471.1|	41.18	49.02	51	30	0	1	51	1	51	0.0005	35.4	hypothetical protein EpJS10_0245 [Enterobacteria phage JS10]
ORF047	gi|729030569|gb|AIZ02323.1|	37.25	49.02	51	32	0	1	51	1	51	0.0006	35	hypothetical protein VR20_265 [Enterobacteria phage vB_EcoM_VR20]
ORF047	gi|299779195|ref|YP_003734389.1|;gi|298105924|gb|ADI55568.1|	41.18	49.02	51	30	0	1	51	29	79	0.001	34.3	unnamed protein product [Enterobacteria phage IME08]
ORF047	gi|161622516|ref|YP_001595376.1|;gi|160213822|gb|ABX11161.1|	35.29	49.02	51	33	0	1	51	1	51	0.002	33.9	hypothetical protein EpJS98_gp247 [Enterobacteria phage JS98]
ORF048	gi|410492087|ref|YP_006907273.1|;gi|642905990|ref|YP_009037521.1|;gi|398313801|emb|CCI89148.1|;gi|407437676|gb|AFU20436.1|;gi|642904144|gb|AIA80164.1|;gi|815007525|gb|AKE45302.1|;gi|815007970|gb|AKE45744.1|;gi|815009232|gb|AKE46999.1|	100	100	90	0	0	1	90	1	90	3e-58	177	hypothetical protein HX01_0196 [Enterobacteria phage HX01]
ORF048	gi|32453738|ref|NP_861947.1|;gi|725950055|ref|YP_009100791.1|;gi|32350557|gb|AAP76156.1|;gi|678223691|gb|AIM50831.1|	97.78	98.89	90	2	0	1	90	1	90	8e-57	174	AsiA anti-sigma 70 protein [Enterobacteria phage RB69]
ORF048	gi|682124517|ref|YP_009056829.1|;gi|604671952|gb|AHV82946.1|	96.67	98.89	90	3	0	1	90	1	90	1e-56	174	anti-sigma 70 protein [Escherichia phage vB_EcoM_PhAPEC2]
ORF048	gi|9632708|ref|NP_049866.1|;gi|116326468|ref|YP_803188.1|;gi|228861563|ref|YP_002854584.1|;gi|330858768|ref|YP_004415143.1|;gi|414086620|ref|YP_006986809.1|;gi|422934665|ref|YP_007004626.1|;gi|639438906|ref|YP_009030863.1|;gi|712915087|ref|YP_009102724.1|;gi|713322552|ref|YP_009098636.1|;gi|713322837|ref|YP_009102452.1|;gi|730984973|ref|YP_009111066.1|;gi|416659|sp|P32267.1|ASIA_BPT4;gi|20150500|…	73.03	89.89	89	24	0	1	89	1	89	2e-42	137	AsiA anti-sigma 70 protein [Enterobacteria phage T4]
ORF048	gi|228861183|ref|YP_002854206.1|;gi|227438857|gb|ACP31169.1|;gi|698043390|gb|AIT75711.1|	73.03	89.89	89	24	0	1	89	1	89	2e-42	137	AsiA [Enterobacteria phage RB51]
ORF048	gi|764447259|ref|WP_044369955.1|;gi|589890003|ref|YP_009005539.1|;gi|583927916|gb|AHI61178.1|	65.88	82.35	85	28	1	5	88	4	88	3e-34	116	anti-sigma 70 protein [Enterobacter phage PG7]
ORF048	gi|311993252|ref|YP_004010118.1|;gi|284178090|gb|ADB81756.1|	64.71	82.35	85	29	1	5	88	4	88	7e-34	115	anti-sigma 70 protein [Enterobacteria phage CC31]
ORF048	gi|456351339|ref|YP_007501291.1|;gi|347466389|gb|AEO97175.1|;gi|408386926|gb|AFU63935.1|	61.18	83.53	85	32	1	6	89	5	89	3e-32	112	anti-sigma 70 protein [Salmonella phage S16]
ORF048	gi|422935032|ref|YP_007004992.1|;gi|343177586|gb|AEM00912.1|	72.6	89.04	73	20	0	1	73	1	73	1e-31	109	anti-sigma 70 protein [Escherichia phage wV7]
ORF048	gi|764161783|ref|YP_009126193.1|;gi|586881420|gb|AHJ86840.1|	56.47	82.35	85	36	1	6	89	5	89	2e-29	104	anti-sigma 70 protein [Salmonella phage STP4-a]
ORF049	gi|642905798|ref|YP_009037522.1|;gi|642903952|gb|AIA79972.1|	99.54	100	219	1	0	1	219	1	219	2e-161	450	phage holin [Escherichia phage vB_EcoM_JS09]
ORF049	gi|398313800|emb|CCI89147.1|;gi|815007526|gb|AKE45303.1|;gi|815007969|gb|AKE45743.1|;gi|815009233|gb|AKE47000.1|	98.63	99.54	219	3	0	1	219	1	219	3e-159	444	phage holin [Yersinia phage phiD1]
ORF049	gi|682124516|ref|YP_009056828.1|;gi|604671951|gb|AHV82945.1|	82.65	93.61	219	38	0	1	219	1	219	2e-139	394	t holin lysis mediator [Escherichia phage vB_EcoM_PhAPEC2]
ORF049	gi|32453737|ref|NP_861946.1|;gi|32350556|gb|AAP76155.1|	82.19	93.61	219	39	0	1	219	5	223	1e-138	392	t holin lysis mediator [Enterobacteria phage RB69]
ORF049	gi|725950054|ref|YP_009100790.1|;gi|678223690|gb|AIM50830.1|	81.74	93.15	219	40	0	1	219	5	223	6e-138	390	holin [Shigella phage Shf125875]
ORF049	gi|138702|sp|P10393.1|VLYS_BPK3;gi|215504|gb|AAA88415.1|;gi|815008221|gb|AKE45994.1|	74.89	88.58	219	54	1	1	219	1	218	2e-124	356	RecName: Full=Lysis protein [Enterobacteria phage K3]
ORF049	gi|9632830|ref|NP_049865.1|;gi|138710|sp|P06808.1|HOLIN_BPT4;gi|5354454|gb|AAD42661.1|AF158101_248;gi|15369|emb|CAA68470.1|;gi|299780612|gb|ADJ39974.1|;gi|628972020|gb|AHY83740.1|;gi|628972212|gb|AHY83931.1|;gi|698042837|gb|AIT75160.1|;gi|698043113|gb|AIT75435.1|	74.89	88.13	219	54	1	1	219	1	218	4e-124	355	t holin lysis mediator [Enterobacteria phage T4]
ORF049	gi|712915086|ref|YP_009102723.1|;gi|397134267|gb|AFO10774.1|	74.89	88.13	219	54	1	1	219	1	218	5e-124	355	hypothetical protein ECML134_248 [Escherichia phage ECML-134]
ORF049	gi|330858767|ref|YP_004415142.1|;gi|327397701|gb|AEA73203.1|	74.89	88.13	219	54	1	1	219	1	218	6e-124	355	putative holin [Shigella phage Shfl2]
ORF049	gi|639438905|ref|YP_009030862.1|;gi|628971733|gb|AHY83455.1|	74.43	88.13	219	55	1	1	219	1	218	6e-124	355	putative holin [Escherichia phage e11/2]
ORF050	gi|398313799|emb|CCI89146.1|	97.81	99.45	183	4	0	1	183	1	183	9e-130	367	phage tail fibers [Yersinia phage phiD1]
ORF050	gi|642905799|ref|YP_009037523.1|;gi|642903953|gb|AIA79973.1|	96.72	98.91	183	6	0	1	183	1	183	1e-128	364	tail fibers [Escherichia phage vB_EcoM_JS09]
ORF050	gi|93663|pir||S13238;gi|14862|emb|CAA38974.1|	88.81	95.1	143	16	0	1	143	1	143	1e-91	268	tail fiber assembly protein gp38 - phage TuIa (fragment) [Enterobacteria phage TuIa]
ORF050	gi|729030857|gb|AIZ02610.1|	65.92	84.36	179	61	0	1	179	1	179	5e-85	253	distal long tail fiber assembly catalyst [Enterobacteria phage vB_EcoM_VR25]
ORF050	gi|308814613|ref|YP_003934887.1|;gi|308206205|gb|ADO19604.1|	65.36	83.8	179	62	0	1	179	1	179	3e-84	251	receptor-recognizing protein 38 [Shigella phage SP18]
ORF050	gi|9632630|ref|NP_049864.1|;gi|138024|sp|P03739.1|TFA_BPT4;gi|5354254|gb|AAD42461.1|AF158101_48;gi|15307|emb|CAA29163.1|;gi|299780611|gb|ADJ39973.1|;gi|628971840|gb|AHY83561.1|;gi|628972228|gb|AHY83947.1|;gi|698042836|gb|AIT75159.1|;gi|698043112|gb|AIT75434.1|;gi|744393284|gb|AJC64537.1|;gi|744393287|gb|AJC64539.1|;gi|744393290|gb|AJC64541.1|;gi|744393293|gb|AJC64543.1|;gi|744393296|gb|AJC64545.1|	65.92	82.12	179	61	0	1	179	1	179	1e-83	250	gp38 distal long tail fiber assembly catalyst [Enterobacteria phage T4]
ORF050	gi|14865|emb|CAA38976.1|	65.92	82.12	179	61	0	1	179	1	179	1e-83	249	receptor-recognizing protein 38 [Enterobacteria phage T4]
ORF050	gi|314121828|ref|YP_004063947.1|;gi|313151585|gb|ADR32641.1|	63.13	82.12	179	66	0	1	179	1	179	2e-81	244	gp38 distal long tail fiber assembly catalyst [Enterobacteria phage vB_EcoM-VR7]
ORF050	gi|553025|gb|AAA32515.1|	68.94	85.61	132	41	0	1	132	1	132	1e-64	199	tail fiber protein 38 [Enterobacteria phage T4]
ORF050	gi|446065332|ref|WP_000143187.1|;gi|418489714|ref|YP_007003526.1|;gi|312601734|gb|ADQ92408.1|;gi|321223495|gb|EFX48560.1|;gi|392817756|gb|EJA73660.1|;gi|392819721|gb|EJA75579.1|;gi|395981540|gb|EJH90761.1|;gi|395982420|gb|EJH91628.1|;gi|395992178|gb|EJI01297.1|;gi|395996218|gb|EJI05270.1|;gi|395996348|gb|EJI05399.1|;gi|396005542|gb|EJI14520.1|;gi|396012397|gb|EJI21294.1|;gi|396015050|gb|EJI23933.…	27.12	45.76	177	119	4	1	167	12	188	3e-16	75.1	tail fiber assembly protein [Salmonella phage RE-2010]
ORF051	gi|314121827|ref|YP_004063946.1|;gi|313151584|gb|ADR32640.1|	65.83	74.39	1074	281	14	1	1016	1	1046	0	1319	gp37 long tail fiber distal subunit [Enterobacteria phage vB_EcoM-VR7]
ORF051	gi|398313798|emb|CCI89145.1|	63.9	74.57	1050	333	10	1	1016	1	1038	0	1254	phage tail fibers [Yersinia phage phiD1]
ORF051	gi|744393285|gb|AJC64538.1|;gi|744393288|gb|AJC64540.1|;gi|744393291|gb|AJC64542.1|	60.39	72.1	1068	329	16	1	1016	1	1026	0	1178	gp37 [Enterobacteria phage T4]
ORF051	gi|9632629|ref|NP_049863.1|;gi|138018|sp|P03744.1|FIB37_BPT4;gi|5354253|gb|AAD42460.1|AF158101_47;gi|215887|gb|AAA32514.1|	60.39	72	1068	329	16	1	1016	1	1026	0	1178	gp37 long tail fiber, distal subunit [Enterobacteria phage T4]
ORF051	gi|744393294|gb|AJC64544.1|;gi|744393297|gb|AJC64546.1|	60.39	72	1068	329	16	1	1016	1	1026	0	1177	gp37 [Enterobacteria phage T4]
ORF051	gi|299780610|gb|ADJ39972.1|;gi|698042835|gb|AIT75158.1|;gi|698043111|gb|AIT75433.1|	60.39	72	1068	329	16	1	1016	1	1026	0	1177	long tail fiber distal subunit [Enterobacteria phage T4T]
ORF051	gi|308814612|ref|YP_003934886.1|;gi|308206204|gb|ADO19603.1|	58.49	70.09	1043	372	12	1	1016	1	1009	0	1144	long tail fiber distal subunit [Shigella phage SP18]
ORF051	gi|3915245|sp|Q38394.1|VG37_BPK3;gi|15111|emb|CAA28445.1|	68.51	80.07	813	241	5	1	799	1	812	0	1117	RecName: Full=Long tail fiber protein p37; Short=Protein Gp37; AltName: Full=Receptor-recognizing protein [Enterobacteria phage K3]
ORF051	gi|299779191|ref|YP_003734385.1|;gi|281312973|gb|ADA59471.1|;gi|298105920|gb|ADI55564.1|	68.97	79.53	767	220	11	1	756	1	760	0	1023	37 gene product [Enterobacteria phage IME08]
ORF051	gi|729030856|gb|AIZ02609.1|	51.5	65.24	1099	418	22	1	1016	1	1067	0	1010	long tail fiber distal subunit adhesine [Enterobacteria phage vB_EcoM_VR25]
ORF052	gi|398313797|emb|CCI89144.1|	98.19	99.1	221	4	0	1	221	1	221	3e-158	442	protein of unknown function [Yersinia phage phiD1]
ORF052	gi|642905801|ref|YP_009037525.1|;gi|642903955|gb|AIA79975.1|	93.21	95.48	221	15	0	1	221	1	221	2e-150	422	hypothetical protein JS09_0202 [Escherichia phage vB_EcoM_JS09]
ORF052	gi|422934661|ref|YP_007004622.1|;gi|339791444|gb|AEK12501.1|	87.78	93.67	221	27	0	1	221	1	221	2e-142	402	tail fiber protein p36 [Enterobacteria phage ime09]
ORF052	gi|9632628|ref|NP_049862.1|;gi|138013|sp|P03743.1|FIB36_BPT4;gi|5354252|gb|AAD42459.1|AF158101_46;gi|215886|gb|AAA32513.1|;gi|299780609|gb|ADJ39971.1|;gi|628971822|gb|AHY83543.1|;gi|628972018|gb|AHY83738.1|;gi|628972210|gb|AHY83929.1|;gi|698043110|gb|AIT75432.1|	84.16	90.05	221	35	0	1	221	1	221	2e-133	379	gp36 hinge connector of long tail fiber, distal connector [Enterobacteria phage T4]
ORF052	gi|698042834|gb|AIT75157.1|	83.71	89.59	221	36	0	1	221	1	221	1e-132	377	hinge connector of long tail fiber distal connector [Enterobacteria phage RB55]
ORF052	gi|422935028|ref|YP_007004988.1|;gi|639438902|ref|YP_009030859.1|;gi|713322833|ref|YP_009102448.1|;gi|343177582|gb|AEM00908.1|;gi|628971730|gb|AHY83452.1|;gi|698042285|gb|AIT74610.1|;gi|815008218|gb|AKE45991.1|	77.83	85.97	221	46	2	1	221	1	218	1e-118	342	hinge connector of long tail fiber distal connector [Escherichia phage wV7]
ORF052	gi|587757361|gb|AHK11094.1|	77.38	85.97	221	47	2	1	221	1	218	2e-118	341	putative hinge connector of long tail fiber distal connector [Escherichia phage HY01]
ORF052	gi|730984969|ref|YP_009111062.1|;gi|694817682|gb|AIS73564.1|	77.38	85.97	221	47	2	1	221	1	218	5e-118	340	hypothetical protein pSs1_00254 [Shigella phage pSs-1]
ORF052	gi|228861179|ref|YP_002854202.1|;gi|227438853|gb|ACP31165.1|;gi|291290470|dbj|BAI83265.1|;gi|698043386|gb|AIT75707.1|	76.92	85.07	221	48	2	1	221	1	218	3e-117	338	gp36 hinge connector long tail fiber [Enterobacteria phage RB51]
ORF052	gi|32453734|ref|NP_861943.1|;gi|32350553|gb|AAP76152.1|	75.57	83.71	221	51	2	1	221	1	218	7e-116	334	gp36 hinge connector of long tail fiber distal connector [Enterobacteria phage RB69]
ORF053	gi|642905802|ref|YP_009037526.1|;gi|642903956|gb|AIA79976.1|	97.07	97.87	375	11	0	1	375	1	375	0	741	hypothetical protein JS09_0203 [Escherichia phage vB_EcoM_JS09]
ORF053	gi|398313796|emb|CCI89143.1|	96.5	98.11	371	13	0	5	375	1	371	0	732	protein of unknown function [Yersinia phage phiD1]
ORF053	gi|682124512|ref|YP_009056824.1|;gi|725950050|ref|YP_009100786.1|;gi|604671947|gb|AHV82941.1|;gi|678223686|gb|AIM50826.1|	73.6	86.4	375	98	1	1	375	1	374	0	570	proximal hinge connector of long tail fiber [Escherichia phage vB_EcoM_PhAPEC2]
ORF053	gi|32453733|ref|NP_861942.1|;gi|32350552|gb|AAP76151.1|	73.33	86.4	375	99	1	1	375	1	374	0	568	gp35 hinge connector of long tail fiber, proximal connector [Enterobacteria phage RB69]
ORF053	gi|228861178|ref|YP_002854201.1|;gi|227438852|gb|ACP31164.1|;gi|698043385|gb|AIT75706.1|	63.44	79.57	372	134	2	1	372	1	370	3e-173	493	gp35 tail fiber hinge [Enterobacteria phage RB51]
ORF053	gi|639438901|ref|YP_009030858.1|;gi|628971729|gb|AHY83451.1|	63.81	79.62	373	132	3	1	372	1	371	4e-173	492	hinge connector of long tail fiber proximal connector [Escherichia phage e11/2]
ORF053	gi|713322832|ref|YP_009102447.1|;gi|698042284|gb|AIT74609.1|	63.71	79.3	372	133	2	1	372	1	370	5e-173	492	hinge connector of long tail fiber, proximal [Enterobacteria phage RB27]
ORF053	gi|299780608|gb|ADJ39970.1|;gi|698042833|gb|AIT75156.1|;gi|698043109|gb|AIT75431.1|	63	79.89	373	135	3	1	372	1	371	2e-172	491	hinge connector of long tail fiber proximal connector [Enterobacteria phage T4T]
ORF053	gi|330858763|ref|YP_004415138.1|;gi|327397697|gb|AEA73199.1|	62.63	79.57	372	137	2	1	372	1	370	3e-172	490	putative hinge connector of long tail fiber [Shigella phage Shfl2]
ORF053	gi|730984968|ref|YP_009111061.1|;gi|694817681|gb|AIS73563.1|	63.44	79.3	372	134	2	1	372	1	370	5e-172	489	hypothetical protein pSs1_00253 [Shigella phage pSs-1]
ORF054	gi|642905803|ref|YP_009037527.1|;gi|642903957|gb|AIA79977.1|	96.59	98.22	1291	44	0	1	1291	1	1291	0	2534	putative long tail fiber proximal subunit [Escherichia phage vB_EcoM_JS09]
ORF054	gi|330858762|ref|YP_004415137.1|;gi|327397696|gb|AEA73198.1|	83.81	91.09	1291	207	1	1	1291	1	1289	0	2216	putative long tail fiber proximal subunit [Shigella phage Shfl2]
ORF054	gi|422934659|ref|YP_007004620.1|;gi|339791442|gb|AEK12499.1|	83.81	90.94	1291	207	1	1	1291	1	1289	0	2212	phage long tail fiber proximal subunit [Enterobacteria phage ime09]
ORF054	gi|398313795|emb|CCI89142.1|	83.73	91.09	1291	208	1	1	1291	1	1289	0	2196	phage long tail fiber proximal subunit [Yersinia phage phiD1]
ORF054	gi|299780607|gb|ADJ39969.1|	82.11	90.47	1291	229	1	1	1291	1	1289	0	2185	long tail fiber proximal subunit [Enterobacteria phage T4T]
ORF054	gi|698042832|gb|AIT75155.1|	82.03	90.4	1291	230	1	1	1291	1	1289	0	2181	long tail fiber proximal subunit [Enterobacteria phage RB55]
ORF054	gi|9632626|ref|NP_049860.1|;gi|138005|sp|P18771.2|FIBP_BPT4;gi|5354250|gb|AAD42457.1|AF158101_44	81.95	90.4	1291	231	1	1	1291	1	1289	0	2179	gp34 long tail fiber, proximal subunit [Enterobacteria phage T4]
ORF054	gi|639438900|ref|YP_009030857.1|;gi|628971728|gb|AHY83450.1|	82.57	90.16	1291	223	1	1	1291	1	1289	0	2176	long tail fiber proximal subunit [Escherichia phage e11/2]
ORF054	gi|291290468|dbj|BAI83263.1|	82.18	89.93	1291	228	1	1	1291	1	1289	0	2171	tail fiber protein [Enterobacteria phage AR1]
ORF054	gi|587757359|gb|AHK11092.1|	82.59	90.4	1292	222	2	1	1291	1	1290	0	2165	putative long tail fiber proximal subunit [Escherichia phage HY01]
ORF055	gi|642905991|ref|YP_009037528.1|;gi|642904145|gb|AIA80165.1|	99.67	100	305	1	0	1	305	1	305	0	632	RnaseH [Escherichia phage vB_EcoM_JS09]
ORF055	gi|725950048|ref|YP_009100784.1|;gi|678223684|gb|AIM50824.1|	99.34	99.67	305	2	0	1	305	1	305	0	630	ribonuclease H [Shigella phage Shf125875]
ORF055	gi|682124510|ref|YP_009056822.1|;gi|604671945|gb|AHV82939.1|	99.34	99.34	305	2	0	1	305	1	305	0	628	RNaseH ribonuclease [Escherichia phage vB_EcoM_PhAPEC2]
ORF055	gi|32453731|ref|NP_861940.1|;gi|32350550|gb|AAP76149.1|	98.62	99.66	290	4	0	1	290	1	290	0	601	RnaseH [Enterobacteria phage RB69]
ORF055	gi|9632723|ref|NP_049859.1|;gi|730984966|ref|YP_009111059.1|;gi|133162|sp|P13319.1|RNH_BPT4;gi|157833933|pdb|1TFR|A;gi|295982228|pdb|3H8J|A;gi|5354347|gb|AAD42554.1|AF158101_141;gi|4490554|emb|CAA33812.1|;gi|299780606|gb|ADJ39968.1|;gi|398313794|emb|CCI89141.1|;gi|587757358|gb|AHK11091.1|;gi|628971805|gb|AHY83526.1|;gi|628972005|gb|AHY83725.1|;gi|628972196|gb|AHY83915.1|;gi|694817679|gb|AIS73561.…	76.72	85.57	305	71	0	1	305	1	305	2e-176	495	RNaseH ribonuclease [Enterobacteria phage T4]
ORF055	gi|414086613|ref|YP_006986802.1|;gi|383396394|gb|AFH20210.1|;gi|525334512|gb|AGR46194.1|	76.72	85.25	305	71	0	1	305	1	305	3e-176	495	ribonuclease RNaseH [Enterobacteria phage vB_EcoM_ACG-C40]
ORF055	gi|330858761|ref|YP_004415136.1|;gi|327397695|gb|AEA73197.1|	76.39	85.57	305	72	0	1	305	1	305	6e-176	494	putative RNaseH ribonuclease [Shigella phage Shfl2]
ORF055	gi|639438899|ref|YP_009030856.1|;gi|628971727|gb|AHY83449.1|	76.39	85.57	305	72	0	1	305	1	305	6e-176	494	ribonuclease [Escherichia phage e11/2]
ORF055	gi|295982229|pdb|3H8S|A	76.39	85.57	305	72	0	1	305	1	305	6e-176	494	Chain A, Structure Of D19n T4 Rnase H In The Presence Of Divalent Mag [Enterobacteria phage T4]
ORF055	gi|158428774|pdb|2IHN|A;gi|295982227|pdb|3H7I|A;gi|295982230|pdb|3H8W|A	76.39	85.57	305	72	0	1	305	1	305	6e-176	494	Chain A, Co-Crystal Of Bacteriophage T4 Rnase H With A Fork Dna Substrate [Enterobacteria phage T4]
ORF056	gi|32453730|ref|NP_861939.1|;gi|682124509|ref|YP_009056821.1|;gi|725950047|ref|YP_009100783.1|;gi|32350549|gb|AAP76148.1|;gi|604671944|gb|AHV82938.1|;gi|678223683|gb|AIM50823.1|	100	100	89	0	0	1	89	7	95	2e-58	178	double-stranded DNA binding protein [Enterobacteria phage RB69]
ORF056	gi|410492088|ref|YP_006907274.1|;gi|642905992|ref|YP_009037529.1|;gi|407437677|gb|AFU20437.1|;gi|642904146|gb|AIA80166.1|;gi|815007263|gb|AKE45040.1|;gi|815008213|gb|AKE45987.1|;gi|815009209|gb|AKE46976.1|	100	100	89	0	0	1	89	1	89	3e-58	177	hypothetical protein HX01_0203 [Enterobacteria phage HX01]
ORF056	gi|9632736|ref|NP_049858.1|;gi|116326460|ref|YP_803180.1|;gi|228861175|ref|YP_002854198.1|;gi|228861555|ref|YP_002854576.1|;gi|330858760|ref|YP_004415135.1|;gi|414086612|ref|YP_006986801.1|;gi|422934656|ref|YP_007004617.1|;gi|422935024|ref|YP_007004984.1|;gi|639438898|ref|YP_009030855.1|;gi|712915079|ref|YP_009102716.1|;gi|713322544|ref|YP_009098628.1|;gi|713322829|ref|YP_009102444.1|;gi|73098496…	83.15	92.13	89	15	0	1	89	1	89	1e-47	150	DsbA dsDNA binding protein, late transcription [Enterobacteria phage T4]
ORF056	gi|398313793|emb|CCI89140.1|	76.4	85.39	89	21	0	1	89	1	89	6e-42	136	protein of unknown function [Yersinia phage phiD1]
ORF056	gi|311993244|ref|YP_004010110.1|;gi|284178082|gb|ADB81748.1|	72.41	83.91	87	24	0	3	89	5	91	2e-39	130	dsDNA binding protein, late transcription [Enterobacteria phage CC31]
ORF056	gi|764447263|ref|WP_044369957.1|;gi|589889995|ref|YP_009005531.1|;gi|583927908|gb|AHI61170.1|	72.41	83.91	87	24	0	3	89	5	91	8e-39	128	double-stranded DNA binding protein [Enterobacter phage PG7]
ORF056	gi|764161775|ref|YP_009126185.1|;gi|586881412|gb|AHJ86832.1|	62.07	82.76	87	33	0	3	89	9	95	4e-33	114	double-stranded DNA binding protein [Salmonella phage STP4-a]
ORF056	gi|456351331|ref|YP_007501283.1|;gi|347466381|gb|AEO97167.1|;gi|408386918|gb|AFU63927.1|	62.07	82.76	87	33	0	3	89	5	91	5e-33	114	double-stranded DNA binding protein [Salmonella phage S16]
ORF056	gi|422934168|ref|YP_007004204.1|;gi|345450677|gb|AEN93880.1|	64.77	77.27	88	30	1	1	87	1	88	3e-32	111	dsDNA binding protein [Enterobacteria phage Bp7]
ORF056	gi|238695392|ref|YP_002922585.1|;gi|220029528|gb|ACL78462.1|;gi|729030277|gb|AIZ02032.1|	64.77	77.27	88	30	1	1	87	1	88	3e-32	111	DsbA dsDNA binding protein, late transcription [Enterobacteria phage JS10]
ORF057	gi|682124508|ref|YP_009056820.1|;gi|604671943|gb|AHV82937.1|;gi|815007264|gb|AKE45041.1|;gi|815008212|gb|AKE45986.1|;gi|815009208|gb|AKE46975.1|	100	100	112	0	0	1	112	1	112	8e-77	227	late promoter transcription accessory protein [Escherichia phage vB_EcoM_PhAPEC2]
ORF057	gi|32453729|ref|NP_861938.1|;gi|642905993|ref|YP_009037530.1|;gi|725950046|ref|YP_009100782.1|;gi|32350548|gb|AAP76147.1|;gi|642904147|gb|AIA80167.1|;gi|678223682|gb|AIM50822.1|	99.11	99.11	112	1	0	1	112	1	112	4e-76	225	gp33 late promoter transcription accessory protein [Enterobacteria phage RB69]
ORF057	gi|228861174|ref|YP_002854197.1|;gi|422935023|ref|YP_007004983.1|;gi|227438848|gb|ACP31160.1|;gi|343177577|gb|AEM00903.1|;gi|698043381|gb|AIT75702.1|;gi|815008480|gb|AKE46253.1|	85.71	95.54	112	16	0	1	112	1	112	1e-66	201	gp33 [Enterobacteria phage RB51]
ORF057	gi|713322828|ref|YP_009102443.1|;gi|698042280|gb|AIT74605.1|	85.71	95.54	112	16	0	1	112	1	112	2e-66	200	late promoter transcription accessory protein [Enterobacteria phage RB27]
ORF057	gi|116326459|ref|YP_803179.1|;gi|115344052|gb|ABI95061.1|;gi|698042552|gb|AIT74876.1|	84.82	94.64	112	17	0	1	112	1	112	6e-66	199	late promoter transcription factor [Enterobacteria phage RB32]
ORF057	gi|9632625|ref|NP_049857.1|;gi|228861554|ref|YP_002854575.1|;gi|330858759|ref|YP_004415134.1|;gi|414086611|ref|YP_006986800.1|;gi|422934655|ref|YP_007004616.1|;gi|639438897|ref|YP_009030854.1|;gi|713322543|ref|YP_009098627.1|;gi|730984964|ref|YP_009111057.1|;gi|138003|sp|P13338.1|VG33_BPT4;gi|5354249|gb|AAD42456.1|AF158101_43;gi|4490556|emb|CAA33814.1|;gi|227438570|gb|ACP30883.1|;gi|291290465|dbj…	84.82	94.64	112	17	0	1	112	1	112	7e-66	199	gp33 late promoter transcription accessory protein [Enterobacteria phage T4]
ORF057	gi|712915078|ref|YP_009102715.1|;gi|397134259|gb|AFO10766.1|	83.93	93.75	112	18	0	1	112	1	112	4e-65	197	hypothetical protein ECML134_240 [Escherichia phage ECML-134]
ORF057	gi|358009675|pdb|3TBI|A	82.88	92.79	111	19	0	2	112	5	115	2e-62	190	Chain A, Crystal Structure Of T4 Gp33 Bound To E. Coli Rnap Beta-Flap Domain [Enterobacteria phage T4]
ORF057	gi|456351330|ref|YP_007501282.1|;gi|764161774|ref|YP_009126184.1|;gi|347466380|gb|AEO97166.1|;gi|408386917|gb|AFU63926.1|;gi|586881411|gb|AHJ86831.1|	61.06	77.88	113	34	2	1	112	1	104	3e-41	136	late promoter transcription accessory protein [Salmonella phage S16]
ORF057	gi|506564806|ref|WP_016031138.1|;gi|311993243|ref|YP_004010109.1|;gi|589889994|ref|YP_009005530.1|;gi|284178081|gb|ADB81747.1|;gi|583927907|gb|AHI61169.1|	53.57	69.64	112	39	1	1	112	1	99	2e-35	121	gp33 late promoter transcription accessory protein [Enterobacteria phage CC31]
ORF058	gi|682124507|ref|YP_009056819.1|;gi|604671942|gb|AHV82936.1|	98.62	99.08	217	3	0	1	217	1	217	3e-156	437	helicase loading protein [Escherichia phage vB_EcoM_PhAPEC2]
ORF058	gi|31978921|gb|AAP68673.1|	98.62	98.62	217	3	0	1	217	1	217	2e-155	434	gp59 [Enterobacteria phage RB69]
ORF058	gi|725950044|ref|YP_009100780.1|;gi|678223680|gb|AIM50820.1|	98.16	98.16	217	4	0	1	217	1	217	6e-155	433	helicase loader [Shigella phage Shf125875]
ORF058	gi|642905994|ref|YP_009037531.1|;gi|642904148|gb|AIA80168.1|	98.58	98.58	212	3	0	6	217	1	212	3e-152	426	hypothetical protein JS09_0208 [Escherichia phage vB_EcoM_JS09]
ORF058	gi|228861173|ref|YP_002854196.1|;gi|330858758|ref|YP_004415133.1|;gi|227438847|gb|ACP31159.1|;gi|327397692|gb|AEA73194.1|;gi|698043380|gb|AIT75701.1|	85.25	90.78	217	32	0	1	217	1	217	1e-132	377	gp59 [Enterobacteria phage RB51]
ORF058	gi|422934654|ref|YP_007004615.1|;gi|339791437|gb|AEK12494.1|	84.79	90.32	217	33	0	1	217	1	217	5e-132	375	phage DNA helicase loader protein [Enterobacteria phage ime09]
ORF058	gi|228861553|ref|YP_002854574.1|;gi|227438569|gb|ACP30882.1|;gi|587757355|gb|AHK11088.1|	84.79	90.32	217	33	0	1	217	1	217	5e-132	375	gp59 [Enterobacteria phage RB14]
ORF058	gi|9632672|ref|NP_049856.1|;gi|116326458|ref|YP_803178.1|;gi|422935022|ref|YP_007004982.1|;gi|639438896|ref|YP_009030853.1|;gi|712915077|ref|YP_009102714.1|;gi|713322542|ref|YP_009098626.1|;gi|138069|sp|P13342.1|VG59_BPT4;gi|7245761|pdb|1C1K|A;gi|5354296|gb|AAD42503.1|AF158101_90;gi|4490557|emb|CAA33815.1|;gi|115344051|gb|ABI95060.1|;gi|291290464|dbj|BAI83259.1|;gi|299780603|gb|ADJ39965.1|;gi|343…	84.79	90.32	217	33	0	1	217	1	217	6e-132	375	gp59 loader of gp41 DNA helicase [Enterobacteria phage T4]
ORF058	gi|713322827|ref|YP_009102442.1|;gi|698042279|gb|AIT74604.1|	84.33	90.32	217	34	0	1	217	1	217	2e-131	374	loader of DNA helicase and ssDNA binding [Enterobacteria phage RB27]
ORF058	gi|730984963|ref|YP_009111056.1|;gi|694817676|gb|AIS73558.1|	84.33	90.32	217	34	0	1	217	1	217	2e-131	374	hypothetical protein pSs1_00248 [Shigella phage pSs-1]
ORF059	gi|682124506|ref|YP_009056818.1|;gi|604671941|gb|AHV82935.1|	99.67	99.67	300	1	0	1	300	1	300	0	611	single-stranded DNA binding protein [Escherichia phage vB_EcoM_PhAPEC2]
ORF059	gi|725950043|ref|YP_009100779.1|;gi|678223679|gb|AIM50819.1|	99.33	99.33	300	1	1	1	300	1	299	0	605	single stranded DNA binding protein [Shigella phage Shf125875]
ORF059	gi|642905995|ref|YP_009037532.1|;gi|642904149|gb|AIA80169.1|	99.33	99.33	300	1	1	1	300	1	299	0	605	single-stranded DNA binding protein [Escherichia phage vB_EcoM_JS09]
ORF059	gi|32453727|ref|NP_861936.1|;gi|31978922|gb|AAP68674.1|;gi|32350546|gb|AAP76145.1|;gi|815007266|gb|AKE45043.1|;gi|815008210|gb|AKE45984.1|;gi|815009206|gb|AKE46973.1|	92.45	96.4	278	21	0	1	278	1	278	2e-180	504	single-stranded DNA binding protein [Enterobacteria phage RB69]
ORF059	gi|311993241|ref|YP_004010107.1|;gi|284178079|gb|ADB81745.1|	72.22	84.64	306	79	2	1	300	1	306	1e-162	460	gp32 single-stranded DNA binding protein [Enterobacteria phage CC31]
ORF059	gi|764447270|ref|WP_044369961.1|;gi|589889992|ref|YP_009005528.1|;gi|583927905|gb|AHI61167.1|	71.9	84.64	306	80	2	1	300	1	306	4e-162	459	single-stranded DNA binding protein [Enterobacter phage PG7]
ORF059	gi|193811872|dbj|BAG54790.1|	81.56	89.72	282	49	2	1	282	1	279	9e-161	455	gene 32 product [Enterobacteria phage T4]
ORF059	gi|9632623|ref|NP_049854.1|;gi|138390|sp|P03695.1|VHED_BPT4;gi|5354247|gb|AAD42454.1|AF158101_41;gi|215883|gb|AAA32511.1|;gi|299780601|gb|ADJ39963.1|;gi|698042826|gb|AIT75149.1|;gi|698043101|gb|AIT75423.1|	82.84	90.67	268	46	0	1	268	1	268	2e-158	449	gp32 single-stranded DNA binding protein [Enterobacteria phage T4]
ORF059	gi|639438894|ref|YP_009030851.1|;gi|628971722|gb|AHY83444.1|	82.46	90.3	268	47	0	1	268	1	268	1e-157	447	single-stranded DNA binding protein [Escherichia phage e11/2]
ORF059	gi|525334507|gb|AGR46189.1|	82.46	90.67	268	47	0	1	268	1	268	1e-157	447	single-stranded DNA binding protein [Yersinia phage PST]
ORF060	gi|682124505|ref|YP_009056817.1|;gi|604671940|gb|AHV82934.1|	96.92	98.46	130	4	0	1	130	1	130	5e-89	259	hypothetical protein PhAPEC2_225 [Escherichia phage vB_EcoM_PhAPEC2]
ORF060	gi|725950042|ref|YP_009100778.1|;gi|678223678|gb|AIM50818.1|	96.15	98.46	130	5	0	1	130	1	130	3e-88	257	hypothetical protein [Shigella phage Shf125875]
ORF060	gi|32453725|ref|NP_861934.1|;gi|31978924|gb|AAP68676.1|;gi|32350544|gb|AAP76143.1|	96.15	98.46	130	5	0	1	130	1	130	1e-87	256	Frd.2 conserved hypothetical protein [Enterobacteria phage RB69]
ORF060	gi|410492089|ref|YP_006907275.1|;gi|642905996|ref|YP_009037533.1|;gi|407437678|gb|AFU20438.1|;gi|642904150|gb|AIA80170.1|	93.28	94.78	134	5	1	1	130	1	134	2e-85	250	hypothetical protein HX01_0208 [Enterobacteria phage HX01]
ORF060	gi|639438892|ref|YP_009030849.1|;gi|628971720|gb|AHY83442.1|	70	76.15	130	37	2	1	130	1	128	2e-54	171	hypothetical protein e112_254 [Escherichia phage e11/2]
ORF060	gi|698043377|gb|AIT75698.1|	69.77	75.97	129	37	2	1	129	1	127	9e-54	169	hypothetical protein RB68_238 [Enterobacteria phage RB68]
ORF060	gi|422935019|ref|YP_007004979.1|;gi|343177573|gb|AEM00899.1|;gi|815008476|gb|AKE46249.1|	69.77	75.97	129	37	2	1	129	1	127	9e-54	169	hypothetical protein [Escherichia phage wV7]
ORF060	gi|228861170|ref|YP_002854193.1|;gi|227438844|gb|ACP31156.1|	69.77	75.97	129	37	2	1	129	1	127	1e-53	169	frd.2 hypothetical protein [Enterobacteria phage RB51]
ORF060	gi|951417|gb|AAA74686.1|	68.99	75.19	129	38	2	1	129	1	127	1e-52	167	frd2 [Enterobacteria phage LZ8]
ORF060	gi|398313788|emb|CCI89135.1|	66.92	73.85	130	41	2	1	130	1	128	6e-51	162	protein of unknown function [Yersinia phage phiD1]
ORF061	gi|32453724|ref|NP_861933.1|;gi|31978925|gb|AAP68677.1|;gi|32350543|gb|AAP76142.1|	97.56	98.78	82	2	0	1	82	1	82	9e-54	166	Frd.1 conserved hypothetical protein [Enterobacteria phage RB69]
ORF061	gi|682124504|ref|YP_009056816.1|;gi|604671939|gb|AHV82933.1|	96.34	97.56	82	3	0	1	82	1	82	8e-53	163	hypothetical protein PhAPEC2_224 [Escherichia phage vB_EcoM_PhAPEC2]
ORF061	gi|410492090|ref|YP_006907276.1|;gi|642905997|ref|YP_009037534.1|;gi|407437679|gb|AFU20439.1|;gi|642904151|gb|AIA80171.1|	96.34	97.56	82	3	0	1	82	1	82	1e-52	163	hypothetical protein HX01_0209 [Enterobacteria phage HX01]
ORF061	gi|725950041|ref|YP_009100777.1|;gi|678223677|gb|AIM50817.1|	85	93.75	80	12	0	1	80	1	80	8e-46	145	hypothetical protein [Shigella phage Shf125875]
ORF061	gi|713322822|ref|YP_009102437.1|;gi|291290459|dbj|BAI83254.1|;gi|698042274|gb|AIT74599.1|	82.5	93.75	80	14	0	1	80	1	80	2e-45	144	hypothetical protein RB27_232 [Enterobacteria phage RB27]
ORF061	gi|9632747|ref|NP_049851.1|;gi|116326454|ref|YP_803174.1|;gi|414086604|ref|YP_006986793.1|;gi|712915073|ref|YP_009102710.1|;gi|731247|sp|P39506.1|Y14C_BPT4;gi|5354371|gb|AAD42578.1|AF158101_165;gi|115344047|gb|ABI95056.1|;gi|299780598|gb|ADJ39960.1|;gi|383396385|gb|AFH20201.1|;gi|397134254|gb|AFO10761.1|;gi|587757350|gb|AHK11083.1|;gi|628971930|gb|AHY83651.1|;gi|628972119|gb|AHY83839.1|;gi|628972…	82.5	93.75	80	14	0	1	80	1	80	3e-45	144	Frd.1 conserved hypothetical protein [Enterobacteria phage T4]
ORF061	gi|422934650|ref|YP_007004611.1|;gi|713322537|ref|YP_009098621.1|;gi|339791433|gb|AEK12490.1|;gi|698040640|gb|AIT72971.1|;gi|698040912|gb|AIT73242.1|;gi|698041184|gb|AIT73513.1|;gi|698041456|gb|AIT73784.1|;gi|698041729|gb|AIT74056.1|;gi|698042003|gb|AIT74329.1|	82.5	93.75	80	14	0	1	80	1	80	3e-45	144	phage protein [Enterobacteria phage ime09]
ORF061	gi|730984959|ref|YP_009111052.1|;gi|694817672|gb|AIS73554.1|	81.25	93.75	80	15	0	1	80	1	80	6e-45	143	hypothetical protein pSs1_00244 [Shigella phage pSs-1]
ORF061	gi|32265035|gb|AAP78916.1|	81.25	92.5	80	15	0	1	80	1	80	8e-45	143	Frd.1 [Enterobacteria phage T2]
ORF061	gi|639438891|ref|YP_009030848.1|;gi|628971719|gb|AHY83441.1|	81.25	92.5	80	15	0	1	80	14	93	1e-44	143	hypothetical protein e112_253 [Escherichia phage e11/2]
ORF062	gi|642905998|ref|YP_009037535.1|;gi|642904152|gb|AIA80172.1|	93.9	96.34	82	5	0	1	82	1	82	3e-51	159	hypothetical protein JS09_0212 [Escherichia phage vB_EcoM_JS09]
ORF062	gi|593779951|ref|YP_009017777.1|;gi|345286601|gb|AEN79627.1|	39.02	56.1	41	22	1	43	80	68	108	3.8	26.9	gp3 [Mycobacterium phage Pleione]
ORF062	gi|593776749|ref|YP_009014597.1|;gi|343171442|gb|AEL98248.1|	39.02	56.1	41	22	1	43	80	68	108	4.8	26.9	gp3 [Mycobacterium phage LinStu]
ORF062	gi|746947403|gb|AJD82821.1|	38.71	51.61	31	19	0	9	39	98	128	6.8	26.2	PD-(D/E)XK nuclease superfamily protein [Achromobacter phage JWX]
ORF062	gi|349502879|gb|AEP84001.1|	43.33	50	30	17	0	43	72	1619	1648	7.2	26.2	hypothetical protein SPN3US_0168 [Salmonella phage SPN3US]
ORF062	gi|9630539|ref|NP_046969.1|;gi|3249599|gb|AAC27053.1|	32.5	42.5	40	27	0	8	47	68	107	7.8	25.8	hypothetical protein psiM2p15 [Methanobacterium phage psiM2]
ORF063	gi|642905999|ref|YP_009037536.1|;gi|642904153|gb|AIA80173.1|	99.49	100	195	1	0	1	195	1	195	2e-143	402	dihydrofolate reductase [Escherichia phage vB_EcoM_JS09]
ORF063	gi|682124503|ref|YP_009056815.1|;gi|604671938|gb|AHV82932.1|	97.95	100	195	4	0	1	195	1	195	3e-142	399	dihydrofolate reductase [Escherichia phage vB_EcoM_PhAPEC2]
ORF063	gi|32453723|ref|NP_861932.1|;gi|31978926|gb|AAP68678.1|;gi|32350542|gb|AAP76141.1|	96.92	99.49	195	6	0	1	195	1	195	1e-140	395	Frd dihydrofolate reductase [Enterobacteria phage RB69]
ORF063	gi|729030266|gb|AIZ02021.1|	67.69	78.46	195	62	1	1	195	1	194	3e-90	267	dihydrofolate reductase [Enterobacteria phage vB_EcoM_VR5]
ORF063	gi|730984957|ref|YP_009111050.1|;gi|694817670|gb|AIS73552.1|	60	75.38	195	77	1	1	195	1	194	3e-80	242	hypothetical protein pSs1_00242 [Shigella phage pSs-1]
ORF063	gi|299780597|gb|ADJ39959.1|;gi|698042822|gb|AIT75145.1|;gi|698043097|gb|AIT75419.1|	59.69	77.55	196	75	3	1	195	1	193	2e-79	239	dihydrofolate reductase [Enterobacteria phage T4T]
ORF063	gi|330858752|ref|YP_004415127.1|;gi|327397686|gb|AEA73188.1|	59.49	74.87	195	78	1	1	195	1	194	5e-79	239	putative dihydrofolate reductase [Shigella phage Shfl2]
ORF063	gi|639438889|ref|YP_009030846.1|;gi|628971717|gb|AHY83439.1|	59.18	77.55	196	76	3	1	195	1	193	7e-79	238	dihydrofolate reductase [Escherichia phage e11/2]
ORF063	gi|398313785|emb|CCI89132.1|	59.18	77.55	196	76	3	1	195	1	193	8e-79	238	dihydrofolate reductase, phage-associated [Yersinia phage phiD1]
ORF063	gi|587757347|gb|AHK11080.1|	58.97	74.87	195	79	1	1	195	1	194	1e-78	238	putative dihydrofolate reductase [Escherichia phage HY01]
ORF064	gi|32453722|ref|NP_861931.1|;gi|682124502|ref|YP_009056814.1|;gi|32350541|gb|AAP76140.1|;gi|604671937|gb|AHV82931.1|	99.3	99.3	286	2	0	1	286	1	286	0	600	dTMP (thymidylate) synthase [Enterobacteria phage RB69]
ORF064	gi|725950037|ref|YP_009100773.1|;gi|678223673|gb|AIM50813.1|	95.45	97.55	286	13	0	1	286	1	286	0	579	thymidylate synthase [Shigella phage Shf125875]
ORF064	gi|642906000|ref|YP_009037537.1|;gi|642904154|gb|AIA80174.1|	89.2	93.03	287	29	2	1	286	1	286	0	533	dTMP thymidylate synthase [Escherichia phage vB_EcoM_JS09]
ORF064	gi|161622629|ref|YP_001595355.1|;gi|52139835|gb|AAU29207.1|	88.46	92.31	286	32	1	1	286	1	285	0	532	dTMP thymidylate synthase [Enterobacteria phage JS98]
ORF064	gi|422934178|ref|YP_007004214.1|;gi|345450687|gb|AEN93890.1|	86.36	91.96	286	39	0	1	286	1	286	0	531	dTMP thymidylate synthase [Enterobacteria phage Bp7]
ORF064	gi|228861545|ref|YP_002854566.1|;gi|32709463|gb|AAP86750.1|;gi|227438561|gb|ACP30874.1|	86.36	91.96	286	39	0	1	286	1	286	0	527	thymidylate synthetase [Enterobacteria phage RB14]
ORF064	gi|238695380|ref|YP_002922573.1|;gi|220029516|gb|ACL78450.1|	86.71	92.31	286	37	1	1	286	1	285	0	525	dTMP (thymidylate) synthase [Enterobacteria phage JS10]
ORF064	gi|32709477|gb|AAP86757.1|	86.01	91.61	286	40	0	1	286	1	286	0	525	thymidylate synthase [Enterobacteria phage U5]
ORF064	gi|299779177|ref|YP_003734371.1|;gi|298105906|gb|ADI55550.1|	84.32	89.9	287	44	1	1	286	3	289	0	513	td gene product [Enterobacteria phage IME08]
ORF064	gi|730984955|ref|YP_009111048.1|;gi|694817668|gb|AIS73550.1|	81.47	89.51	286	53	0	1	286	1	286	0	505	hypothetical protein pSs1_00240 [Shigella phage pSs-1]
ORF065	gi|682124501|ref|YP_009056813.1|;gi|604671936|gb|AHV82930.1|	94.05	100	84	5	0	1	84	1	84	9e-53	163	hypothetical protein PhAPEC2_221 [Escherichia phage vB_EcoM_PhAPEC2]
ORF065	gi|32453721|ref|NP_861930.1|;gi|410492091|ref|YP_006907277.1|;gi|642906001|ref|YP_009037538.1|;gi|725950036|ref|YP_009100772.1|;gi|32350540|gb|AAP76139.1|;gi|407437680|gb|AFU20440.1|;gi|642904155|gb|AIA80175.1|;gi|678223672|gb|AIM50812.1|	91.67	100	84	7	0	1	84	1	84	6e-52	161	NrdA.2 conserved hypothetical protein [Enterobacteria phage RB69]
ORF065	gi|525334496|gb|AGR46178.1|	38.75	62.5	80	44	3	1	79	1	76	2e-11	57.8	hypothetical protein [Yersinia phage PST]
ORF065	gi|587757344|gb|AHK11077.1|	38.75	62.5	80	44	3	1	79	1	76	2e-11	57	hypothetical protein HY01_0222 [Escherichia phage HY01]
ORF065	gi|712915066|ref|YP_009102703.1|;gi|713322531|ref|YP_009098615.1|;gi|713322816|ref|YP_009102431.1|;gi|730984954|ref|YP_009111047.1|;gi|32265036|gb|AAP78917.1|;gi|113951990|gb|ABI48930.1|;gi|291290453|dbj|BAI83248.1|;gi|397134247|gb|AFO10754.1|;gi|694817667|gb|AIS73549.1|;gi|698040634|gb|AIT72965.1|;gi|698040906|gb|AIT73236.1|;gi|698041178|gb|AIT73507.1|;gi|698041450|gb|AIT73778.1|;gi|698041723|gb…	38.75	62.5	80	44	3	1	79	1	76	3e-11	57	hypothetical protein ECML134_228 [Escherichia phage ECML-134]
ORF065	gi|9632792|ref|NP_049847.1|;gi|418579|sp|P32280.1|Y14B_BPT4;gi|5354416|gb|AAD42623.1|AF158101_210;gi|215922|gb|AAA32530.1|;gi|509023|gb|AAA32526.1|;gi|299780594|gb|ADJ39956.1|;gi|628971920|gb|AHY83641.1|;gi|628972109|gb|AHY83829.1|;gi|628972304|gb|AHY84023.1|;gi|698042819|gb|AIT75142.1|;gi|698043094|gb|AIT75416.1|	38.75	62.5	80	44	3	1	79	1	76	3e-11	56.6	NrdA.2 conserved hypothetical protein [Enterobacteria phage T4]
ORF065	gi|414086597|ref|YP_006986786.1|;gi|113952003|gb|ABI48940.1|;gi|383396378|gb|AFH20194.1|	38.75	61.25	80	44	3	1	79	1	76	4e-11	56.2	hypothetical protein ACG-C40_0229 [Enterobacteria phage vB_EcoM_ACG-C40]
ORF065	gi|639438885|ref|YP_009030842.1|;gi|628971713|gb|AHY83435.1|	38.75	61.25	80	44	3	1	79	1	76	6e-11	55.8	hypothetical protein e112_247 [Escherichia phage e11/2]
ORF065	gi|729031130|gb|AIZ02882.1|	39.74	56.41	78	40	2	1	78	1	71	1e-10	55.1	hypothetical protein VR26_245 [Enterobacteria phage vB_EcoM_VR26]
ORF065	gi|398313781|emb|CCI89128.1|	37.5	61.25	80	45	3	1	79	1	76	2e-10	54.7	protein of unknown function [Yersinia phage phiD1]
ORF066	gi|642906002|ref|YP_009037539.1|;gi|642904156|gb|AIA80176.1|	99.6	99.73	751	3	0	1	751	1	751	0	1566	ribonucleoside-diphosphate reductase subunit alpha [Escherichia phage vB_EcoM_JS09]
ORF066	gi|682124500|ref|YP_009056812.1|;gi|604671935|gb|AHV82929.1|	99.33	99.47	751	5	0	1	751	1	751	0	1562	aerobic NDP reductase large subunit [Escherichia phage vB_EcoM_PhAPEC2]
ORF066	gi|725950035|ref|YP_009100771.1|;gi|678223671|gb|AIM50811.1|	99.2	99.47	751	6	0	1	751	1	751	0	1562	aerobic NDP reductase large subunit [Shigella phage Shf125875]
ORF066	gi|32453720|ref|NP_861929.1|;gi|32350539|gb|AAP76138.1|	98.54	98.93	751	11	0	1	751	1	751	0	1548	ribonucleoside-diphosphate reductase subunit alpha [Enterobacteria phage RB69]
ORF066	gi|238695378|ref|YP_002922571.1|;gi|220029514|gb|ACL78448.1|	91.21	95.61	751	66	0	1	751	1	751	0	1452	NrdA aerobic NDP reductase, large subunit [Enterobacteria phage JS10]
ORF066	gi|422934180|ref|YP_007004216.1|;gi|345450689|gb|AEN93892.1|	90.95	95.47	751	68	0	1	751	1	751	0	1449	aerobic NDP reductase large subunit [Enterobacteria phage Bp7]
ORF066	gi|299779175|ref|YP_003734369.1|;gi|298105904|gb|ADI55548.1|	90.81	95.61	751	69	0	1	751	5	755	0	1449	nrdA gene product [Enterobacteria phage IME08]
ORF066	gi|161622627|ref|YP_001595353.1|;gi|160331905|gb|AAU29205.2|	91.08	95.47	751	67	0	1	751	1	751	0	1449	NrdA aerobic NDP reductase large subunit [Enterobacteria phage JS98]
ORF066	gi|729030264|gb|AIZ02019.1|	90.15	95.34	751	74	0	1	751	1	751	0	1442	ribonucleoside-diphosphate reductase subunit alpha [Enterobacteria phage vB_EcoM_VR5]
ORF066	gi|729030838|gb|AIZ02591.1|	88.55	93.34	751	86	0	1	751	1	751	0	1411	ribonucleoside-diphosphate reductase subunit alpha [Enterobacteria phage vB_EcoM_VR25]
ORF067	gi|713322813|ref|YP_009102428.1|;gi|32709423|gb|AAP86730.1|;gi|698042265|gb|AIT74590.1|	88.52	93.37	392	45	0	1	392	1	392	0	738	aerobic ribonucleoside diphosphate reductase small subunit [Enterobacteria phage RB27]
ORF067	gi|291290450|dbj|BAI83245.1|	88.27	93.37	392	46	0	1	392	1	392	0	736	NrdB aerobic NDP reductase, small subunit [Enterobacteria phage AR1]
ORF067	gi|414086594|ref|YP_006986783.1|;gi|383396375|gb|AFH20191.1|	88.01	93.11	392	47	0	1	392	1	392	0	735	aerobic NDP reductase small subunit [Enterobacteria phage vB_EcoM_ACG-C40]
ORF067	gi|228861541|ref|YP_002854562.1|;gi|227438557|gb|ACP30870.1|	88.01	93.11	392	47	0	1	392	1	392	0	735	ribonucleotide reductase B subunit [Enterobacteria phage RB14]
ORF067	gi|730984951|ref|YP_009111044.1|;gi|694817664|gb|AIS73546.1|	87.24	92.35	392	50	0	1	392	1	392	0	724	hypothetical protein pSs1_00236 [Shigella phage pSs-1]
ORF067	gi|525334493|gb|AGR46175.1|	86.73	92.35	392	52	0	1	392	1	392	0	723	aerobic NDP reductase small subunit [Yersinia phage PST]
ORF067	gi|32709431|gb|AAP86734.1|	86.48	92.6	392	53	0	1	392	1	392	0	721	NrdB [Enterobacteria phage T2H]
ORF067	gi|228861159|ref|YP_002854182.1|;gi|227438833|gb|ACP31145.1|;gi|698043366|gb|AIT75687.1|	86.48	92.6	392	53	0	1	392	1	392	0	721	ribonucleotide reductase B subunit [Enterobacteria phage RB51]
ORF067	gi|642906003|ref|YP_009037540.1|;gi|642904157|gb|AIA80177.1|	85.71	90.56	392	56	0	1	392	1	392	0	708	NrdB [Escherichia phage vB_EcoM_JS09]
ORF067	gi|725950034|ref|YP_009100770.1|;gi|678223670|gb|AIM50810.1|	86.48	90.82	392	53	0	1	392	1	392	0	708	aerobic NDP reductase small subunit [Shigella phage Shf125875]
ORF068	gi|642906004|ref|YP_009037541.1|;gi|682124498|ref|YP_009056810.1|;gi|604671933|gb|AHV82927.1|;gi|642904158|gb|AIA80178.1|;gi|815007275|gb|AKE45052.1|;gi|815008201|gb|AKE45975.1|;gi|815009197|gb|AKE46964.1|	100	100	136	0	0	1	136	1	136	6e-97	280	endonuclease II [Escherichia phage vB_EcoM_JS09]
ORF068	gi|32453718|ref|NP_861927.1|;gi|725950033|ref|YP_009100769.1|;gi|32350537|gb|AAP76136.1|;gi|678223669|gb|AIM50809.1|	97.79	98.53	136	3	0	1	136	1	136	5e-95	275	endonuclease II [Enterobacteria phage RB69]
ORF068	gi|456351305|ref|YP_007501257.1|;gi|764161756|ref|YP_009126166.1|;gi|347466363|gb|AEO97149.1|;gi|408386899|gb|AFU63908.1|;gi|586881393|gb|AHJ86813.1|	81.62	93.38	136	25	0	1	136	1	136	3e-82	242	endonuclease II [Salmonella phage S16]
ORF068	gi|414086593|ref|YP_006986782.1|;gi|712915062|ref|YP_009102699.1|;gi|677286749|sp|P07059.3|END2_BPT4;gi|15344|emb|CAA27759.1|;gi|383396374|gb|AFH20190.1|;gi|397134243|gb|AFO10750.1|;gi|698042538|gb|AIT74862.1|;gi|698042813|gb|AIT75136.1|;gi|698043088|gb|AIT75410.1|	78.68	90.44	136	29	0	1	136	1	136	8e-76	226	endonuclease II [Enterobacteria phage vB_EcoM_ACG-C40]
ORF068	gi|9632727|ref|NP_049840.1|;gi|116326445|ref|YP_803165.1|;gi|639438877|ref|YP_009030834.1|;gi|5354351|gb|AAD42558.1|AF158101_145;gi|115344038|gb|ABI95047.1|;gi|299780588|gb|ADJ39950.1|;gi|628971705|gb|AHY83427.1|;gi|628971863|gb|AHY83584.1|;gi|628972057|gb|AHY83777.1|	78.68	90.44	136	29	0	1	136	9	144	1e-75	226	DenA endonuclease II [Enterobacteria phage T4]
ORF068	gi|228861158|ref|YP_002854181.1|;gi|228861540|ref|YP_002854561.1|;gi|330858745|ref|YP_004415120.1|;gi|422934641|ref|YP_007004602.1|;gi|422935007|ref|YP_007004967.1|;gi|713322525|ref|YP_009098609.1|;gi|713322812|ref|YP_009102427.1|;gi|730984950|ref|YP_009111043.1|;gi|227438556|gb|ACP30869.1|;gi|227438832|gb|ACP31144.1|;gi|291290449|dbj|BAI83244.1|;gi|327397679|gb|AEA73181.1|;gi|339791424|gb|AEK124…	78.68	90.44	136	29	0	1	136	1	136	1e-75	225	endonuclease II [Enterobacteria phage RB51]
ORF068	gi|161622512|ref|YP_001595351.1|;gi|238695376|ref|YP_002922569.1|;gi|160213818|gb|ABX11157.1|;gi|220029512|gb|ACL78446.1|;gi|729030262|gb|AIZ02017.1|	75.74	88.24	136	33	0	1	136	9	144	5e-74	222	DenA endonuclease II [Enterobacteria phage JS98]
ORF068	gi|311993224|ref|YP_004010090.1|;gi|284178062|gb|ADB81728.1|	76.47	86.03	136	32	0	1	136	1	136	5e-74	221	endonuclease II [Enterobacteria phage CC31]
ORF068	gi|299779173|ref|YP_003734367.1|;gi|298105902|gb|ADI55546.1|	75.74	88.97	136	33	0	1	136	9	144	6e-74	221	denA gene product [Enterobacteria phage IME08]
ORF068	gi|422934185|ref|YP_007004221.1|;gi|345450694|gb|AEN93897.1|	75	88.97	136	34	0	1	136	9	144	8e-74	221	endonuclease II [Enterobacteria phage Bp7]
ORF069	gi|642906005|ref|YP_009037542.1|;gi|642904159|gb|AIA80179.1|	99.2	99.73	374	3	0	1	374	1	374	0	764	RNA ligase A [Escherichia phage vB_EcoM_JS09]
ORF069	gi|682124497|ref|YP_009056809.1|;gi|604671932|gb|AHV82926.1|	94.65	97.86	374	20	0	1	374	1	374	0	736	RNA ligase 1 and tail fiber attachment catalyst [Escherichia phage vB_EcoM_PhAPEC2]
ORF069	gi|725950032|ref|YP_009100768.1|;gi|678223668|gb|AIM50808.1|	94.65	97.86	374	20	0	1	374	1	374	0	736	RNA ligase I tail fiber attachment [Shigella phage Shf125875]
ORF069	gi|32453717|ref|NP_861926.1|;gi|32350536|gb|AAP76135.1|	94.65	98.13	374	20	0	1	374	1	374	0	736	RNA ligase A [Enterobacteria phage RB69]
ORF069	gi|712915061|ref|YP_009102698.1|;gi|397134242|gb|AFO10749.1|	68.53	82.67	375	116	2	1	374	1	374	0	541	hypothetical protein ECML134_223 [Escherichia phage ECML-134]
ORF069	gi|713322811|ref|YP_009102426.1|;gi|698042263|gb|AIT74588.1|	68.53	82.67	375	116	2	1	374	1	374	0	541	RNA ligase 1 and tail fiber attachment catalyst [Enterobacteria phage RB27]
ORF069	gi|398313774|emb|CCI89121.1|	68	82.93	375	118	2	1	374	1	374	0	541	protein of unknown function [Yersinia phage phiD1]
ORF069	gi|228861539|ref|YP_002854560.1|;gi|227438555|gb|ACP30868.1|	68.27	82.67	375	117	2	1	374	1	374	0	540	RNA ligase [Enterobacteria phage RB14]
ORF069	gi|639438876|ref|YP_009030833.1|;gi|628971704|gb|AHY83426.1|	67.73	82.93	375	119	2	1	374	13	386	0	540	RNA ligase 1 and tail fiber attachment catalyst [Escherichia phage e11/2]
ORF069	gi|291290448|dbj|BAI83243.1|	68	82.67	375	118	2	1	374	1	374	0	540	RnlA RNA ligase 1 and tail fiber attachment catalyst [Enterobacteria phage AR1]
ORF070	gi|682124496|ref|YP_009056808.1|;gi|604671931|gb|AHV82925.1|	99.4	99.4	166	1	0	1	166	22	187	1e-119	340	inhibitor of host transcription [Escherichia phage vB_EcoM_PhAPEC2]
ORF070	gi|725950031|ref|YP_009100767.1|;gi|678223667|gb|AIM50807.1|	98.8	99.4	166	2	0	1	166	22	187	5e-119	339	inhibitor of host transcription [Shigella phage Shf125875]
ORF070	gi|32453716|ref|NP_861925.1|;gi|32350535|gb|AAP76134.1|	99.39	99.39	164	1	0	3	166	1	164	1e-118	337	Alc inhibitor of host transcription [Enterobacteria phage RB69]
ORF070	gi|642906006|ref|YP_009037543.1|;gi|642904160|gb|AIA80180.1|	95.78	97.59	166	7	0	1	166	1	166	4e-107	308	inhibitor of host transcription [Escherichia phage vB_EcoM_JS09]
ORF070	gi|729030260|gb|AIZ02015.1|	81.21	90.3	165	31	0	1	165	1	165	4e-98	285	inhibitor of host transcription [Enterobacteria phage vB_EcoM_VR5]
ORF070	gi|238695374|ref|YP_002922567.1|;gi|220029510|gb|ACL78444.1|	83.44	92.02	163	27	0	3	165	1	163	1e-92	271	Alc inhibitor of host transcription [Enterobacteria phage JS10]
ORF070	gi|299779171|ref|YP_003734365.1|;gi|298105900|gb|ADI55544.1|	82.42	91.52	165	29	0	1	165	1	165	2e-92	271	alc gene product [Enterobacteria phage IME08]
ORF070	gi|161622510|ref|YP_001595349.1|;gi|160213816|gb|ABX11155.1|	82.82	91.41	163	28	0	3	165	1	163	8e-92	269	Alc inhibitor of host transcription [Enterobacteria phage JS98]
ORF070	gi|431809164|ref|YP_007236061.1|;gi|398313453|emb|CCI88802.1|	51.19	67.86	168	79	3	1	165	1	168	3e-52	168	Alc inhibitor of host transcription [Yersinia phage phiR1-RT]
ORF070	gi|330858743|ref|YP_004415118.1|;gi|422934639|ref|YP_007004600.1|;gi|327397677|gb|AEA73179.1|;gi|339791422|gb|AEK12479.1|;gi|398313773|emb|CCI89120.1|;gi|525334490|gb|AGR46172.1|;gi|587757338|gb|AHK11071.1|	53.94	70.91	165	73	3	1	163	1	164	3e-51	166	putative Alc inhibitor of host transcription [Shigella phage Shfl2]
ORF071	gi|32453715|ref|NP_861924.1|;gi|32350534|gb|AAP76133.1|;gi|815007278|gb|AKE45055.1|;gi|815008198|gb|AKE45972.1|;gi|815009194|gb|AKE46961.1|	100	100	118	0	0	1	118	1	118	2e-78	231	PseT.3 conserved hypothetical predicted membrane protein [Enterobacteria phage RB69]
ORF071	gi|725950030|ref|YP_009100766.1|;gi|678223666|gb|AIM50806.1|	99.15	99.15	118	1	0	1	118	1	118	1e-77	229	hypothetical protein [Shigella phage Shf125875]
ORF071	gi|642906007|ref|YP_009037544.1|;gi|642904161|gb|AIA80181.1|	98.31	99.15	118	2	0	1	118	1	118	4e-77	228	hypothetical protein JS09_0221 [Escherichia phage vB_EcoM_JS09]
ORF071	gi|682124495|ref|YP_009056807.1|;gi|604671930|gb|AHV82924.1|	98.31	100	118	2	0	1	118	1	118	5e-77	228	hypothetical protein PhAPEC2_215 [Escherichia phage vB_EcoM_PhAPEC2]
ORF071	gi|161622509|ref|YP_001595348.1|;gi|160213815|gb|ABX11154.1|	50.89	71.43	112	55	0	7	118	6	117	4e-33	115	PseT.3 conserved hypothetical predicted membrane protein [Enterobacteria phage JS98]
ORF071	gi|238695373|ref|YP_002922566.1|;gi|220029509|gb|ACL78443.1|	50	71.43	112	56	0	7	118	6	117	1e-32	114	PseT.3 conserved hypothetical predicted membrane protein [Enterobacteria phage JS10]
ORF071	gi|299779170|ref|YP_003734364.1|;gi|422934187|ref|YP_007004223.1|;gi|298105899|gb|ADI55543.1|;gi|345450696|gb|AEN93899.1|	50	70.54	112	56	0	7	118	6	117	3e-32	113	pseT.3 gene product [Enterobacteria phage IME08]
ORF071	gi|729030259|gb|AIZ02014.1|	51.38	70.64	109	48	1	10	118	14	117	5e-31	110	hypothetical protein VR5_227 [Enterobacteria phage vB_EcoM_VR5]
ORF071	gi|116326442|ref|YP_803162.1|;gi|115344035|gb|ABI95044.1|;gi|698042535|gb|AIT74859.1|	49.07	67.59	108	51	1	10	117	13	116	2e-27	101	hypothetical membrane protein [Enterobacteria phage RB32]
ORF071	gi|414086590|ref|YP_006986779.1|;gi|713322522|ref|YP_009098606.1|;gi|713322809|ref|YP_009102424.1|;gi|383396371|gb|AFH20187.1|;gi|698040625|gb|AIT72956.1|;gi|698040897|gb|AIT73227.1|;gi|698041169|gb|AIT73498.1|;gi|698041441|gb|AIT73769.1|;gi|698041714|gb|AIT74041.1|;gi|698041988|gb|AIT74314.1|;gi|698042261|gb|AIT74586.1|	49.07	67.59	108	51	1	10	117	13	116	3e-27	100	hypothetical protein ACG-C40_0222 [Enterobacteria phage vB_EcoM_ACG-C40]
ORF072	gi|682124494|ref|YP_009056806.1|;gi|604671929|gb|AHV82923.1|	89.58	92.71	96	10	0	1	96	1	96	1e-61	187	hypothetical protein PhAPEC2_214 [Escherichia phage vB_EcoM_PhAPEC2]
ORF072	gi|725950029|ref|YP_009100765.1|;gi|678223665|gb|AIM50805.1|	88.54	92.71	96	11	0	1	96	1	96	2e-61	186	hypothetical protein [Shigella phage Shf125875]
ORF072	gi|32453714|ref|NP_861923.1|;gi|32350533|gb|AAP76132.1|	88.54	91.67	96	11	0	1	96	1	96	7e-61	185	PseT.2 conserved hypothetical protein [Enterobacteria phage RB69]
ORF072	gi|642906008|ref|YP_009037545.1|;gi|642904162|gb|AIA80182.1|	88.54	91.67	96	11	0	1	96	1	96	1e-60	184	hypothetical protein JS09_0222 [Escherichia phage vB_EcoM_JS09]
ORF072	gi|238695372|ref|YP_002922565.1|;gi|220029508|gb|ACL78442.1|	81.25	89.58	96	18	0	1	96	1	96	1e-55	171	PseT.2 conserved hypothetical protein [Enterobacteria phage JS10]
ORF072	gi|422934188|ref|YP_007004224.1|;gi|345450697|gb|AEN93900.1|	81.25	89.58	96	18	0	1	96	1	96	3e-55	171	conserved hypothetical predicted membrane protein [Enterobacteria phage Bp7]
ORF072	gi|161622508|ref|YP_001595347.1|;gi|160213814|gb|ABX11153.1|	79.17	88.54	96	20	0	1	96	1	96	7e-55	169	PseT.2 conserved hypothetical protein [Enterobacteria phage JS98]
ORF072	gi|299779169|ref|YP_003734363.1|;gi|298105898|gb|ADI55542.1|	80.21	89.58	96	19	0	1	96	1	96	2e-54	168	pseT.2 gene product [Enterobacteria phage IME08]
ORF072	gi|729030258|gb|AIZ02013.1|	75	88.54	96	24	0	1	96	1	96	3e-52	163	hypothetical protein VR5_226 [Enterobacteria phage vB_EcoM_VR5]
ORF072	gi|116326441|ref|YP_803161.1|;gi|228861154|ref|YP_002854177.1|;gi|228861536|ref|YP_002854557.1|;gi|330858741|ref|YP_004415116.1|;gi|414086589|ref|YP_006986778.1|;gi|422934637|ref|YP_007004598.1|;gi|422935003|ref|YP_007004963.1|;gi|639438873|ref|YP_009030830.1|;gi|712915058|ref|YP_009102695.1|;gi|713322808|ref|YP_009102423.1|;gi|730984946|ref|YP_009111039.1|;gi|115344034|gb|ABI95043.1|;gi|22743855…	67.68	78.79	99	29	1	1	96	1	99	7e-45	144	hypothetical protein RB32ORF219c [Enterobacteria phage RB32]
ORF073	gi|32453713|ref|NP_861922.1|;gi|642906009|ref|YP_009037546.1|;gi|682124493|ref|YP_009056805.1|;gi|32350532|gb|AAP76131.1|;gi|604671928|gb|AHV82922.1|;gi|642904163|gb|AIA80183.1|;gi|815007280|gb|AKE45057.1|;gi|815008196|gb|AKE45970.1|;gi|815009192|gb|AKE46959.1|	100	100	72	0	0	1	72	1	72	2e-47	149	PseT.1 conserved hypothetical protein [Enterobacteria phage RB69]
ORF073	gi|725950028|ref|YP_009100764.1|;gi|678223664|gb|AIM50804.1|	97.22	98.61	72	2	0	1	72	3	74	2e-45	144	hypothetical protein [Shigella phage Shf125875]
ORF073	gi|9632812|ref|NP_049835.1|;gi|639438872|ref|YP_009030829.1|;gi|731242|sp|P39502.1|Y13I_BPT4;gi|5354436|gb|AAD42643.1|AF158101_230;gi|299780583|gb|ADJ39945.1|;gi|628971700|gb|AHY83422.1|;gi|628971934|gb|AHY83655.1|;gi|628972123|gb|AHY83843.1|;gi|628972318|gb|AHY84037.1|;gi|698042808|gb|AIT75131.1|;gi|698043083|gb|AIT75405.1|	82.35	91.18	68	12	0	5	72	6	73	2e-35	118	PseT.1 conserved hypothetical protein [Enterobacteria phage T4]
ORF073	gi|330858740|ref|YP_004415115.1|;gi|422934636|ref|YP_007004597.1|;gi|730984945|ref|YP_009111038.1|;gi|327397674|gb|AEA73176.1|;gi|339791419|gb|AEK12476.1|;gi|398313770|emb|CCI89117.1|;gi|525334487|gb|AGR46169.1|;gi|694817658|gb|AIS73540.1|	82.35	91.18	68	12	0	5	72	6	73	2e-35	118	hypothetical protein Shfl2p224 [Shigella phage Shfl2]
ORF073	gi|228861153|ref|YP_002854176.1|;gi|228861535|ref|YP_002854556.1|;gi|422935002|ref|YP_007004962.1|;gi|227438551|gb|ACP30864.1|;gi|227438827|gb|ACP31139.1|;gi|343177556|gb|AEM00882.1|;gi|698043360|gb|AIT75681.1|;gi|815008459|gb|AKE46232.1|	82.35	91.18	68	12	0	5	72	6	73	2e-35	118	pseT.1 hypothetical protein [Enterobacteria phage RB51]
ORF073	gi|116326440|ref|YP_803160.1|;gi|414086588|ref|YP_006986777.1|;gi|712915057|ref|YP_009102694.1|;gi|115344033|gb|ABI95042.1|;gi|291290444|dbj|BAI83239.1|;gi|383396369|gb|AFH20185.1|;gi|397134238|gb|AFO10745.1|;gi|587757335|gb|AHK11068.1|;gi|698042533|gb|AIT74857.1|	82.35	91.18	68	12	0	5	72	6	73	2e-35	118	hypothetical protein RB32ORF218c [Enterobacteria phage RB32]
ORF073	gi|713322520|ref|YP_009098604.1|;gi|713322807|ref|YP_009102422.1|;gi|698040623|gb|AIT72954.1|;gi|698040895|gb|AIT73225.1|;gi|698041167|gb|AIT73496.1|;gi|698041439|gb|AIT73767.1|;gi|698041712|gb|AIT74039.1|;gi|698041986|gb|AIT74312.1|;gi|698042259|gb|AIT74584.1|	80.88	89.71	68	13	0	5	72	6	73	6e-34	115	hypothetical protein RB3_218 [Enterobacteria phage RB3]
ORF073	gi|664802322|gb|AIF71824.1|	26.39	56.94	72	49	2	1	72	1	68	0.0002	37	hypothetical protein SU10_072 [Phage vB_EcoP_SU10]
ORF073	gi|410490928|ref|YP_006906137.1|;gi|408385114|gb|AFU62546.1|;gi|769829126|gb|AJW61455.1|	27.63	50	76	43	2	1	72	1	68	0.0002	37	hypothetical protein NJ01_086 [Enterobacteria phage NJ01]
ORF073	gi|30089900|ref|NP_839930.1|;gi|21954689|gb|AAM83078.1|AF489521_39	31.48	50	54	35	2	16	68	55	107	1.9	27.3	hypothetical protein P335p39 [Lactococcus phage P335 sensu lato]
ORF074	gi|682124492|ref|YP_009056804.1|;gi|604671927|gb|AHV82921.1|	94.95	96.97	99	5	0	1	99	1	99	1e-61	187	hypothetical protein PhAPEC2_212 [Escherichia phage vB_EcoM_PhAPEC2]
ORF074	gi|642906010|ref|YP_009037547.1|;gi|725950027|ref|YP_009100763.1|;gi|642904164|gb|AIA80184.1|;gi|678223663|gb|AIM50803.1|	94.95	96.97	99	5	0	1	99	1	99	2e-61	186	hypothetical protein JS09_0224 [Escherichia phage vB_EcoM_JS09]
ORF074	gi|32453712|ref|NP_861921.1|;gi|32350531|gb|AAP76130.1|	94.87	97.44	78	4	0	22	99	1	78	5e-46	147	RB69ORF231c hypothetical protein [Enterobacteria phage RB69]
ORF074	gi|422934635|ref|YP_007004596.1|;gi|339791418|gb|AEK12475.1|	65.09	76.42	106	30	1	1	99	1	106	5e-40	132	hypothetical protein [Enterobacteria phage ime09]
ORF074	gi|525334486|gb|AGR46168.1|	64.15	76.42	106	31	1	1	99	1	106	1e-39	131	hypothetical protein [Yersinia phage PST]
ORF074	gi|330858739|ref|YP_004415114.1|;gi|327397673|gb|AEA73175.1|	64.15	75.47	106	31	1	1	99	1	106	3e-39	130	hypothetical protein Shfl2p223 [Shigella phage Shfl2]
ORF074	gi|116326439|ref|YP_803159.1|;gi|115344032|gb|ABI95041.1|;gi|698042532|gb|AIT74856.1|	64.15	75.47	106	31	1	1	99	1	106	3e-39	130	hypothetical protein RB32ORF217c [Enterobacteria phage RB32]
ORF074	gi|414086587|ref|YP_006986776.1|;gi|383396368|gb|AFH20184.1|;gi|398313769|emb|CCI89116.1|	64.15	75.47	106	31	1	1	99	1	106	5e-39	130	hypothetical protein ACG-C40_0219 [Enterobacteria phage vB_EcoM_ACG-C40]
ORF074	gi|228861534|ref|YP_002854555.1|;gi|713322519|ref|YP_009098603.1|;gi|227438550|gb|ACP30863.1|;gi|698040622|gb|AIT72953.1|;gi|698040894|gb|AIT73224.1|;gi|698041166|gb|AIT73495.1|;gi|698041438|gb|AIT73766.1|;gi|698041711|gb|AIT74038.1|;gi|698041985|gb|AIT74311.1|	66	81	100	33	1	1	99	1	100	2e-38	128	RB32ORF217c hypothetical protein [Enterobacteria phage RB14]
ORF074	gi|730984944|ref|YP_009111037.1|;gi|694817657|gb|AIS73539.1|	63.21	74.53	106	32	1	1	99	1	106	2e-38	128	hypothetical protein pSs1_00229 [Shigella phage pSs-1]
ORF075	gi|32453711|ref|NP_861920.1|;gi|642906011|ref|YP_009037548.1|;gi|725950026|ref|YP_009100762.1|;gi|32350530|gb|AAP76129.1|;gi|642904165|gb|AIA80185.1|;gi|678223662|gb|AIM50802.1|;gi|815007282|gb|AKE45059.1|;gi|815008194|gb|AKE45968.1|;gi|815009190|gb|AKE46957.1|	98.41	100	63	1	0	1	63	1	63	2e-39	128	RB69ORF230c hypothetical protein [Enterobacteria phage RB69]
ORF075	gi|682124491|ref|YP_009056803.1|;gi|604671926|gb|AHV82920.1|	96.83	100	63	2	0	1	63	1	63	5e-39	127	hypothetical protein PhAPEC2_211 [Escherichia phage vB_EcoM_PhAPEC2]
ORF075	gi|33323568|gb|AAQ07538.1|AF503408_62	28.57	48.98	49	35	0	14	62	376	424	1.1	28.1	Dam [Enterobacteria phage P7]
ORF075	gi|46401691|ref|YP_006537.1|;gi|33338718|gb|AAQ14041.1|	28.57	48.98	49	35	0	14	62	458	506	1.2	28.1	Dmt [Enterobacteria phage P1]
ORF075	gi|157168391|ref|YP_001456748.1|;gi|74268823|emb|CAB93924.2|	32.35	58.82	34	23	0	27	60	240	273	1.2	27.7	gp18, tail protein [Corynebacterium phage BFK20]
ORF075	gi|33338827|gb|AAQ14149.1|	28.57	48.98	49	35	0	14	62	458	506	1.3	27.7	Dmt, incomplete [Enterobacteria phage P1]
ORF075	gi|448260380|ref|YP_007348478.1|;gi|408385252|gb|AFU62683.1|	27.27	52.27	44	30	1	5	48	317	358	3.5	26.6	putative ribonucleotide reductase of class Ia (aerobic) alpha subunit [Escherichia phage phAPEC8]
ORF075	gi|725949346|ref|YP_009098939.1|;gi|529281641|gb|AGS81066.1|	31.67	50	60	39	1	3	60	46	105	4.2	26.2	prohead core protein [Caulobacter phage Cr30]
ORF075	gi|311993514|ref|YP_004010379.1|;gi|295917471|gb|ADG60142.1|	38.46	65.38	26	16	0	6	31	92	117	4.4	26.2	gp35 hinge connector of long tail fiber proximal connector [Acinetobacter phage Acj9]
ORF075	gi|682123211|ref|YP_009055531.1|;gi|544165196|gb|AGV99305.1|	23.68	52.63	38	29	0	23	60	21	58	4.4	25.8	putative dCTP deaminase [Escherichia phage vB_EcoP_PhAPEC5]
ORF076	gi|682124490|ref|YP_009056802.1|;gi|604671925|gb|AHV82919.1|	98.33	99.33	299	5	0	1	299	1	299	0	620	putative polynucleotide 5'-kinase and 3'-phosphatase [Escherichia phage vB_EcoM_PhAPEC2]
ORF076	gi|725950025|ref|YP_009100761.1|;gi|678223661|gb|AIM50801.1|	97.66	98.66	299	7	0	1	299	1	299	0	613	polynucleotide 5'-kinase and 3'-phosphatase [Shigella phage Shf125875]
ORF076	gi|642906012|ref|YP_009037549.1|;gi|642904166|gb|AIA80186.1|	96.99	98.66	299	9	0	1	299	1	299	0	612	polynucleotide kinase [Escherichia phage vB_EcoM_JS09]
ORF076	gi|32453710|ref|NP_861919.1|;gi|32350529|gb|AAP76128.1|	97.32	97.99	299	8	0	1	299	1	299	0	611	polynucleotide kinase [Enterobacteria phage RB69]
ORF076	gi|308814585|ref|YP_003934859.1|;gi|308206177|gb|ADO19576.1|	79.33	87.33	300	61	1	1	299	2	301	1e-177	498	polynucleotide 5'-kinase and 3'-phosphatase [Shigella phage SP18]
ORF076	gi|729030535|gb|AIZ02289.1|;gi|729031119|gb|AIZ02871.1|	78.33	87.33	300	64	1	1	299	2	301	3e-176	494	polynucleotide kinase [Enterobacteria phage vB_EcoM_VR20]
ORF076	gi|291290442|dbj|BAI83237.1|	76.33	85.33	300	70	1	1	299	2	301	2e-171	482	polynucleotide 5'-kinase and 3'-phosphatase [Enterobacteria phage AR1]
ORF076	gi|228861151|ref|YP_002854174.1|;gi|227438825|gb|ACP31137.1|;gi|698043358|gb|AIT75679.1|	76.33	85.33	300	70	1	1	299	1	300	3e-171	482	dN 3'phosphatase [Enterobacteria phage RB51]
ORF076	gi|422935000|ref|YP_007004960.1|;gi|343177554|gb|AEM00880.1|;gi|815008457|gb|AKE46230.1|	76	85.33	300	71	1	1	299	2	301	3e-171	481	polynucleotide 5'-kinase and 3'-phosphatase [Escherichia phage wV7]
ORF076	gi|713322805|ref|YP_009102420.1|;gi|698042257|gb|AIT74582.1|	76.33	85	300	70	1	1	299	2	301	5e-171	481	putative polynucleotide 5'-kinase and 3'-phosphatase [Enterobacteria phage RB27]
ORF077	gi|32453709|ref|NP_861918.1|;gi|642906013|ref|YP_009037550.1|;gi|682124489|ref|YP_009056801.1|;gi|725950024|ref|YP_009100760.1|;gi|32350528|gb|AAP76127.1|;gi|604671924|gb|AHV82918.1|;gi|642904167|gb|AIA80187.1|;gi|678223660|gb|AIM50800.1|;gi|815007284|gb|AKE45061.1|;gi|815008192|gb|AKE45966.1|;gi|815009188|gb|AKE46955.1|	98.41	98.41	63	1	0	1	63	1	63	5e-39	127	Cd.4 conserved hypothetical protein [Enterobacteria phage RB69]
ORF077	gi|410492092|ref|YP_006907278.1|;gi|407437681|gb|AFU20441.1|	92.06	93.65	63	5	0	1	63	1	63	2e-35	118	hypothetical protein HX01_0225 [Enterobacteria phage HX01]
ORF077	gi|398313766|emb|CCI89113.1|	52.38	76.19	63	30	0	1	63	4	66	1e-20	80.1	protein of unknown function [Yersinia phage phiD1]
ORF077	gi|9632719|ref|NP_049832.1|;gi|731240|sp|P39500.1|Y13G_BPT4;gi|5354343|gb|AAD42550.1|AF158101_137;gi|299780580|gb|ADJ39942.1|;gi|525334483|gb|AGR46165.1|;gi|628971948|gb|AHY83669.1|;gi|628972137|gb|AHY83857.1|;gi|628972332|gb|AHY84051.1|;gi|698042805|gb|AIT75128.1|;gi|698043080|gb|AIT75402.1|	52.38	74.6	63	30	0	1	63	4	66	3e-20	79	Cd.4 conserved hypothetical protein [Enterobacteria phage T4]
ORF077	gi|291290440|dbj|BAI83235.1|	52.38	74.6	63	30	0	1	63	4	66	6e-20	78.2	conserved hypothetical protein [Enterobacteria phage AR1]
ORF077	gi|414086584|ref|YP_006986773.1|;gi|383396365|gb|AFH20181.1|	50.79	74.6	63	31	0	1	63	4	66	9e-20	77.8	hypothetical protein ACG-C40_0216 [Enterobacteria phage vB_EcoM_ACG-C40]
ORF077	gi|228861149|ref|YP_002854172.1|;gi|228861531|ref|YP_002854552.1|;gi|422934998|ref|YP_007004958.1|;gi|639438868|ref|YP_009030825.1|;gi|227438547|gb|ACP30860.1|;gi|227438823|gb|ACP31135.1|;gi|343177552|gb|AEM00878.1|;gi|587757331|gb|AHK11064.1|;gi|628971696|gb|AHY83418.1|;gi|698043356|gb|AIT75677.1|;gi|815008455|gb|AKE46228.1|	50.79	74.6	63	31	0	1	63	4	66	1e-19	77.4	hypothetical protein RB51ORF219 [Enterobacteria phage RB51]
ORF077	gi|712915053|ref|YP_009102690.1|;gi|397134234|gb|AFO10741.1|	50.79	74.6	63	31	0	1	63	4	66	3e-19	76.6	hypothetical protein ECML134_215 [Escherichia phage ECML-134]
ORF077	gi|330858736|ref|YP_004415111.1|;gi|327397670|gb|AEA73172.1|	49.21	73.02	63	32	0	1	63	4	66	5e-19	76.3	hypothetical protein Shfl2p220 [Shigella phage Shfl2]
ORF077	gi|314121797|ref|YP_004063916.1|;gi|313151554|gb|ADR32610.1|	42.86	71.43	63	36	0	1	63	4	66	5e-15	65.5	Cd.4 conserved hypothetical protein [Enterobacteria phage vB_EcoM-VR7]
ORF078	gi|32453708|ref|NP_861917.1|;gi|725950023|ref|YP_009100759.1|;gi|32350527|gb|AAP76126.1|;gi|678223659|gb|AIM50799.1|;gi|815007285|gb|AKE45062.1|;gi|815008191|gb|AKE45965.1|;gi|815009187|gb|AKE46954.1|	100	100	74	0	0	1	74	1	74	8e-49	152	RB69ORF227c hypothetical protein [Enterobacteria phage RB69]
ORF078	gi|642906014|ref|YP_009037551.1|;gi|642904168|gb|AIA80188.1|	100	100	71	0	0	4	74	1	71	1e-46	147	hypothetical protein JS09_0228 [Escherichia phage vB_EcoM_JS09]
ORF078	gi|682124488|ref|YP_009056800.1|;gi|604671923|gb|AHV82917.1|	95.77	95.77	71	3	0	4	74	1	71	1e-43	139	hypothetical protein PhAPEC2_208 [Escherichia phage vB_EcoM_PhAPEC2]
ORF078	gi|161622504|ref|YP_001595343.1|;gi|238695368|ref|YP_002922561.1|;gi|160213810|gb|ABX11149.1|;gi|220029504|gb|ACL78438.1|	74.65	88.73	71	18	0	4	74	1	71	1e-33	114	hypothetical protein EpJS98_gp214 [Enterobacteria phage JS98]
ORF078	gi|422934192|ref|YP_007004228.1|;gi|345450701|gb|AEN93904.1|	73.24	87.32	71	19	0	4	74	1	71	8e-33	112	conserved hypothetical protein [Enterobacteria phage Bp7]
ORF078	gi|299779165|ref|YP_003734359.1|;gi|298105894|gb|ADI55538.1|	73.24	87.32	71	19	0	4	74	37	107	8e-33	113	unnamed protein product [Enterobacteria phage IME08]
ORF078	gi|729030533|gb|AIZ02287.1|;gi|729031117|gb|AIZ02869.1|	71.83	85.92	71	20	0	4	74	1	71	4e-32	110	hypothetical protein VR20_229 [Enterobacteria phage vB_EcoM_VR20]
ORF078	gi|729030253|gb|AIZ02008.1|	71.83	85.92	71	20	0	4	74	1	71	5e-32	109	hypothetical protein VR5_221 [Enterobacteria phage vB_EcoM_VR5]
ORF078	gi|456351296|ref|YP_007501248.1|;gi|764161748|ref|YP_009126158.1|;gi|347466355|gb|AEO97141.1|;gi|586881385|gb|AHJ86805.1|	67.61	87.32	71	23	0	4	74	1	71	8e-32	109	hypothetical protein [Salmonella phage S16]
ORF078	gi|308814582|ref|YP_003934856.1|;gi|308206174|gb|ADO19573.1|	70.42	85.92	71	21	0	4	74	1	71	1e-31	108	hypothetical protein SP18_gp233 [Shigella phage SP18]
ORF079	gi|32453707|ref|NP_861916.1|;gi|410492093|ref|YP_006907279.1|;gi|642906015|ref|YP_009037552.1|;gi|725950022|ref|YP_009100758.1|;gi|32350526|gb|AAP76125.1|;gi|407437682|gb|AFU20442.1|;gi|642904169|gb|AIA80189.1|;gi|678223658|gb|AIM50798.1|;gi|815007286|gb|AKE45063.1|;gi|815008190|gb|AKE45964.1|;gi|815009186|gb|AKE46953.1|	100	100	91	0	0	1	91	1	91	1e-60	184	Cd.3 conserved hypothetical protein [Enterobacteria phage RB69]
ORF079	gi|682124487|ref|YP_009056799.1|;gi|604671922|gb|AHV82916.1|	97.8	98.9	91	2	0	1	91	1	91	3e-59	180	hypothetical protein PhAPEC2_207 [Escherichia phage vB_EcoM_PhAPEC2]
ORF079	gi|639438867|ref|YP_009030824.1|;gi|628971695|gb|AHY83417.1|	80.22	87.91	91	18	0	1	91	1	91	7e-47	149	hypothetical protein e112_229 [Escherichia phage e11/2]
ORF079	gi|116326437|ref|YP_803157.1|;gi|115344030|gb|ABI95039.1|;gi|291290439|dbj|BAI83234.1|;gi|698042530|gb|AIT74854.1|	80.22	89.01	91	18	0	1	91	1	91	9e-47	149	hypothetical protein RB32ORF215c [Enterobacteria phage RB32]
ORF079	gi|9632718|ref|NP_049831.1|;gi|228861530|ref|YP_002854551.1|;gi|712915052|ref|YP_009102689.1|;gi|731239|sp|P39499.1|Y13F_BPT4;gi|5354342|gb|AAD42549.1|AF158101_136;gi|227438546|gb|ACP30859.1|;gi|299780579|gb|ADJ39941.1|;gi|397134233|gb|AFO10740.1|;gi|398313765|emb|CCI89112.1|;gi|525334482|gb|AGR46164.1|;gi|628971912|gb|AHY83633.1|;gi|628972102|gb|AHY83822.1|;gi|628972297|gb|AHY84016.1|;gi|6980428…	79.12	87.91	91	19	0	1	91	1	91	3e-46	147	Cd.3 conserved hypothetical protein [Enterobacteria phage T4]
ORF079	gi|330858735|ref|YP_004415110.1|;gi|414086583|ref|YP_006986772.1|;gi|422934631|ref|YP_007004592.1|;gi|327397669|gb|AEA73171.1|;gi|339791414|gb|AEK12471.1|;gi|383396364|gb|AFH20180.1|;gi|587757330|gb|AHK11063.1|	79.12	87.91	91	19	0	1	91	1	91	4e-46	147	hypothetical protein Shfl2p219 [Shigella phage Shfl2]
ORF079	gi|730984940|ref|YP_009111033.1|;gi|694817653|gb|AIS73535.1|	79.12	87.91	91	19	0	1	91	1	91	4e-46	147	hypothetical protein pSs1_00225 [Shigella phage pSs-1]
ORF079	gi|228861148|ref|YP_002854171.1|;gi|713322517|ref|YP_009098601.1|;gi|713322804|ref|YP_009102419.1|;gi|227438822|gb|ACP31134.1|;gi|698040620|gb|AIT72951.1|;gi|698040892|gb|AIT73222.1|;gi|698041164|gb|AIT73493.1|;gi|698041436|gb|AIT73764.1|;gi|698041709|gb|AIT74036.1|;gi|698041983|gb|AIT74309.1|;gi|698042256|gb|AIT74581.1|;gi|698043355|gb|AIT75676.1|	78.02	87.91	91	20	0	1	91	1	91	4e-46	147	cd.3 hypothetical protein [Enterobacteria phage RB51]
ORF079	gi|422934997|ref|YP_007004957.1|;gi|343177551|gb|AEM00877.1|;gi|815008454|gb|AKE46227.1|	78.02	87.91	91	20	0	1	91	1	91	6e-46	146	hypothetical protein [Escherichia phage wV7]
ORF079	gi|422934193|ref|YP_007004229.1|;gi|345450702|gb|AEN93905.1|	47.83	69.57	92	47	1	1	91	1	92	2e-25	94.4	conserved hypothetical protein [Enterobacteria phage Bp7]
ORF080	gi|410492094|ref|YP_006907280.1|;gi|642906016|ref|YP_009037553.1|;gi|725950021|ref|YP_009100757.1|;gi|407437683|gb|AFU20443.1|;gi|642904170|gb|AIA80190.1|;gi|678223657|gb|AIM50797.1|;gi|815007287|gb|AKE45064.1|;gi|815008189|gb|AKE45963.1|;gi|815009185|gb|AKE46952.1|	100	100	78	0	0	1	78	1	78	2e-51	160	hypothetical protein HX01_0228 [Enterobacteria phage HX01]
ORF080	gi|32453706|ref|NP_861915.1|;gi|32350525|gb|AAP76124.1|	96.1	98.7	77	3	0	2	78	7	83	2e-48	152	Cd.2 conserved hypothetical protein [Enterobacteria phage RB69]
ORF080	gi|682124486|ref|YP_009056798.1|;gi|604671921|gb|AHV82915.1|	92.31	94.87	78	6	0	1	78	1	78	3e-47	149	hypothetical protein PhAPEC2_206 [Escherichia phage vB_EcoM_PhAPEC2]
ORF080	gi|729030250|gb|AIZ02005.1|	84	89.33	75	12	0	1	75	1	75	8e-40	130	hypothetical protein VR5_218 [Enterobacteria phage vB_EcoM_VR5]
ORF080	gi|238695365|ref|YP_002922558.1|;gi|220029501|gb|ACL78435.1|	81.33	89.33	75	14	0	1	75	1	75	4e-38	125	Cd.2 conserved hypothetical protein [Enterobacteria phage JS10]
ORF080	gi|422934195|ref|YP_007004231.1|;gi|345450704|gb|AEN93907.1|	81.33	89.33	75	14	0	1	75	1	75	5e-38	125	conserved hypothetical protein [Enterobacteria phage Bp7]
ORF080	gi|314121793|ref|YP_004063912.1|;gi|313151550|gb|ADR32606.1|	77.33	86.67	75	17	0	1	75	1	75	5e-37	123	Cd.2 conserved hypothetical protein [Enterobacteria phage vB_EcoM-VR7]
ORF080	gi|161622501|ref|YP_001595340.1|;gi|160213807|gb|ABX11146.1|	80	88	75	15	0	1	75	1	75	5e-37	122	Cd.2 conserved hypothetical protein [Enterobacteria phage JS98]
ORF080	gi|729030822|gb|AIZ02575.1|	77.33	85.33	75	17	0	1	75	1	75	1e-36	122	hypothetical protein VR25_231 [Enterobacteria phage vB_EcoM_VR25]
ORF080	gi|299779162|ref|YP_003734356.1|;gi|298105891|gb|ADI55535.1|	78.67	88	75	16	0	1	75	1	75	2e-36	121	cd.2 gene product [Enterobacteria phage IME08]
ORF081	gi|410492095|ref|YP_006907281.1|;gi|642906017|ref|YP_009037554.1|;gi|407437684|gb|AFU20444.1|;gi|642904171|gb|AIA80191.1|	100	100	41	0	0	1	41	1	41	8e-22	81.6	hypothetical protein HX01_0229 [Enterobacteria phage HX01]
ORF081	gi|589890820|ref|YP_009006939.1|;gi|567727346|gb|AHC94139.1|	37.04	66.67	27	17	0	1	27	4	30	3.5	24.6	hypothetical protein T548_0061 [Lactococcus phage phiL47]
ORF081	gi|587757375|gb|AHK11108.1|	32.14	64.29	28	19	0	14	41	56	83	3.8	24.6	hypothetical protein HY01_0253 [Escherichia phage HY01]
ORF081	gi|422935051|ref|YP_007005011.1|;gi|730984725|ref|YP_009110818.1|;gi|291290491|dbj|BAI83286.1|;gi|343177605|gb|AEM00931.1|;gi|398313818|emb|CCI89165.1|;gi|694817438|gb|AIS73320.1|;gi|815008238|gb|AKE46011.1|	32.14	64.29	28	19	0	14	41	56	83	5.1	24.6	hypothetical phage protein [Escherichia phage wV7]
ORF081	gi|228861584|ref|YP_002854605.1|;gi|712915105|ref|YP_009102742.1|;gi|227438600|gb|ACP30913.1|;gi|397134286|gb|AFO10793.1|	32.14	64.29	28	19	0	14	41	56	83	5.2	24.6	hypothetical protein RB14ORF269 [Enterobacteria phage RB14]
ORF081	gi|422934684|ref|YP_007004645.1|;gi|339791467|gb|AEK12524.1|	32.14	64.29	28	19	0	14	41	56	83	5.5	24.3	hypothetical protein [Enterobacteria phage ime09]
ORF081	gi|525334536|gb|AGR46218.1|	33.33	62.96	27	18	0	14	40	56	82	8.4	23.9	hypothetical protein [Yersinia phage PST]
ORF081	gi|589891408|ref|YP_009007647.1|;gi|552947265|gb|AGY48146.1|	31.25	59.38	32	22	0	5	36	1942	1973	8.8	24.6	virion assoviated RNA polymerase [Acinetobacter phage Presley]
ORF081	gi|418488785|ref|YP_007002797.1|;gi|363453974|gb|AEW24347.1|	48	56	25	13	0	7	31	325	349	9.7	24.6	terminase DNA packaging enzyme large subunit [Escherichia phage PhaxI]
ORF082	gi|725950020|ref|YP_009100756.1|;gi|678223656|gb|AIM50796.1|;gi|815007289|gb|AKE45066.1|;gi|815008187|gb|AKE45961.1|;gi|815009183|gb|AKE46950.1|	99.7	99.7	330	1	0	1	330	1	330	0	686	AroG [Shigella phage Shf125875]
ORF082	gi|682124485|ref|YP_009056797.1|;gi|604671920|gb|AHV82914.1|	99.39	99.7	330	2	0	1	330	1	330	0	685	hypothetical protein PhAPEC2_205 [Escherichia phage vB_EcoM_PhAPEC2]
ORF082	gi|642906018|ref|YP_009037555.1|;gi|642904172|gb|AIA80192.1|	98.79	99.39	330	4	0	1	330	1	330	0	681	phospho-2-dehydro-3-deoxyheptonate aldolase [Escherichia phage vB_EcoM_JS09]
ORF082	gi|815853887|ref|YP_009134030.1|;gi|723019978|gb|AIX23943.1|	28.89	41.11	90	49	2	63	147	170	249	1.8	31.6	DNA adenine methylase [Synechococcus phage ACG-2014j]
ORF082	gi|14251157|ref|NP_116525.1|;gi|928835|gb|AAA98586.1|;gi|26005554|emb|CAC80174.1|	42.42	54.55	33	19	0	30	62	50	82	4.6	30	hypothetical protein BK5-Tp33 [Lactococcus phage BK5-T]
ORF082	gi|56694875|ref|YP_164385.1|;gi|52631302|gb|AAU85054.1|	44	80	25	14	0	9	33	18	42	8.4	27.3	cro [Bacillus phage BCJA1c]
ORF083	gi|682124484|ref|YP_009056796.1|;gi|604671919|gb|AHV82913.1|	99.48	99.48	193	1	0	1	193	1	193	2e-142	400	deoxycytidylate deaminase [Escherichia phage vB_EcoM_PhAPEC2]
ORF083	gi|642906019|ref|YP_009037556.1|;gi|642904173|gb|AIA80193.1|	98.45	98.96	193	3	0	1	193	1	193	7e-141	396	deoxycytidylate deaminase [Escherichia phage vB_EcoM_JS09]
ORF083	gi|725950019|ref|YP_009100755.1|;gi|678223655|gb|AIM50795.1|	96.89	98.96	193	6	0	1	193	1	193	1e-139	393	dCMP deaminase [Shigella phage Shf125875]
ORF083	gi|32453705|ref|NP_861914.1|;gi|32350524|gb|AAP76123.1|	96.97	98.18	165	5	0	1	165	1	165	6e-116	332	deoxycytidylate deaminase [Enterobacteria phage RB69]
ORF083	gi|308814577|ref|YP_003934851.1|;gi|308206169|gb|ADO19568.1|	72.02	79.79	193	54	0	1	193	1	193	7e-102	297	dCMP deaminase [Shigella phage SP18]
ORF083	gi|314121791|ref|YP_004063910.1|;gi|313151548|gb|ADR32604.1|;gi|729030528|gb|AIZ02282.1|;gi|729030820|gb|AIZ02573.1|;gi|729031112|gb|AIZ02864.1|	72.02	79.27	193	54	0	1	193	1	193	2e-101	296	deoxycytidylate deaminase [Enterobacteria phage vB_EcoM-VR7]
ORF083	gi|116326433|ref|YP_803153.1|;gi|228861145|ref|YP_002854168.1|;gi|228861526|ref|YP_002854547.1|;gi|414086580|ref|YP_006986769.1|;gi|422934627|ref|YP_007004588.1|;gi|422934994|ref|YP_007004954.1|;gi|639438864|ref|YP_009030821.1|;gi|712915048|ref|YP_009102685.1|;gi|713322800|ref|YP_009102415.1|;gi|730984936|ref|YP_009111029.1|;gi|115344026|gb|ABI95035.1|;gi|227438542|gb|ACP30855.1|;gi|227438819|gb|…	71.5	80.31	193	55	0	1	193	1	193	5e-101	295	dCMP deaminase [Enterobacteria phage RB32]
ORF083	gi|9632715|ref|NP_049828.1|;gi|118398|sp|P16006.1|DCTD_BPT4;gi|5354339|gb|AAD42546.1|AF158101_133;gi|215838|gb|AAA32489.1|;gi|299780576|gb|ADJ39938.1|;gi|628971836|gb|AHY83557.1|;gi|628972033|gb|AHY83753.1|;gi|628972225|gb|AHY83944.1|;gi|698042801|gb|AIT75124.1|;gi|698043076|gb|AIT75398.1|	71.5	80.31	193	55	0	1	193	1	193	6e-101	295	Cd dCMP deaminase [Enterobacteria phage T4]
ORF083	gi|713322513|ref|YP_009098597.1|;gi|698040616|gb|AIT72947.1|;gi|698040888|gb|AIT73218.1|;gi|698041160|gb|AIT73489.1|;gi|698041432|gb|AIT73760.1|;gi|698041705|gb|AIT74032.1|;gi|698041979|gb|AIT74305.1|	71.5	80.31	193	55	0	1	193	1	193	7e-101	294	deoxycytidylate deaminase [Enterobacteria phage RB3]
ORF083	gi|330858731|ref|YP_004415106.1|;gi|327397665|gb|AEA73167.1|;gi|398313761|emb|CCI89108.1|	71.5	79.79	193	55	0	1	193	1	193	2e-100	293	putative deoxycytidylate deaminase [Shigella phage Shfl2]
ORF084	gi|642906020|ref|YP_009037557.1|;gi|642904174|gb|AIA80194.1|	98.98	100	98	1	0	1	98	1	98	1e-66	200	hypothetical protein JS09_0234 [Escherichia phage vB_EcoM_JS09]
ORF084	gi|410492096|ref|YP_006907282.1|;gi|407437685|gb|AFU20445.1|	97.96	98.98	98	2	0	1	98	1	98	4e-66	198	hypothetical protein HX01_0232 [Enterobacteria phage HX01]
ORF084	gi|32453704|ref|NP_861913.1|;gi|32350523|gb|AAP76122.1|	97.96	98.98	98	2	0	1	98	1	98	5e-66	198	gp31.1 conserved hypothetical protein [Enterobacteria phage RB69]
ORF084	gi|682124483|ref|YP_009056795.1|;gi|604671918|gb|AHV82912.1|	97.96	100	98	2	0	1	98	1	98	5e-66	198	hypothetical protein PhAPEC2_203 [Escherichia phage vB_EcoM_PhAPEC2]
ORF084	gi|725950018|ref|YP_009100754.1|;gi|678223654|gb|AIM50794.1|;gi|815007291|gb|AKE45068.1|;gi|815008185|gb|AKE45959.1|;gi|815009181|gb|AKE46948.1|	97.96	98.98	98	2	0	1	98	1	98	2e-65	197	hypothetical protein [Shigella phage Shf125875]
ORF084	gi|729030246|gb|AIZ02001.1|	56.57	69.7	99	42	1	1	98	1	99	1e-29	105	hypothetical protein VR5_214 [Enterobacteria phage vB_EcoM_VR5]
ORF084	gi|422934197|ref|YP_007004233.1|;gi|345450706|gb|AEN93909.1|	55.56	68.69	99	43	1	1	98	1	99	2e-29	105	conserved hypothetical protein [Enterobacteria phage Bp7]
ORF084	gi|161622498|ref|YP_001595337.1|;gi|160213804|gb|ABX11143.1|	54.55	67.68	99	44	1	1	98	1	99	2e-28	102	gp31.1 conserved hypothetical protein [Enterobacteria phage JS98]
ORF084	gi|308814575|ref|YP_003934849.1|;gi|308206167|gb|ADO19566.1|	53.54	68.69	99	45	1	1	98	1	99	4e-28	101	hypothetical protein SP18_gp226 [Shigella phage SP18]
ORF084	gi|729030526|gb|AIZ02280.1|	53.54	68.69	99	45	1	1	98	1	99	6e-28	101	hypothetical protein VR20_222 [Enterobacteria phage vB_EcoM_VR20]
ORF085	gi|32453703|ref|NP_861912.1|;gi|642906021|ref|YP_009037558.1|;gi|682124482|ref|YP_009056794.1|;gi|725950017|ref|YP_009100753.1|;gi|20805899|gb|AAM28886.1|AF506707_1;gi|32350522|gb|AAP76121.1|;gi|604671917|gb|AHV82911.1|;gi|642904175|gb|AIA80195.1|;gi|678223653|gb|AIM50793.1|;gi|815007292|gb|AKE45069.1|;gi|815008184|gb|AKE45958.1|;gi|815009180|gb|AKE46947.1|	100	100	110	0	0	1	110	1	110	1e-73	218	gp31 head assembly cochaperone with GroEL [Enterobacteria phage RB69]
ORF085	gi|9632620|ref|NP_049825.1|;gi|116326430|ref|YP_803150.1|;gi|228861142|ref|YP_002854165.1|;gi|330858728|ref|YP_004415103.1|;gi|414086577|ref|YP_006986766.1|;gi|422934991|ref|YP_007004951.1|;gi|639438861|ref|YP_009030818.1|;gi|712915045|ref|YP_009102682.1|;gi|713322510|ref|YP_009098594.1|;gi|713322797|ref|YP_009102412.1|;gi|730984933|ref|YP_009111026.1|;gi|137999|sp|P17313.1|VG31_BPT4;gi|3660212|p…	96.4	97.3	111	3	1	1	110	1	111	6e-70	209	gp31 head assembly cochaperone with GroEL [Enterobacteria phage T4]
ORF085	gi|228861523|ref|YP_002854544.1|;gi|422934624|ref|YP_007004585.1|;gi|227438539|gb|ACP30852.1|;gi|339791407|gb|AEK12464.1|	95.5	97.3	111	4	1	1	110	1	111	7e-70	209	gp31 head assembly co-chaperonin for GroEL [Enterobacteria phage RB14]
ORF085	gi|587757323|gb|AHK11056.1|	94.64	96.43	112	4	1	1	110	1	112	9e-70	209	putative head assembly cochaperone with GroEL [Escherichia phage HY01]
ORF085	gi|299779158|ref|YP_003734352.1|;gi|298105887|gb|ADI55531.1|	82.41	90.74	108	19	0	3	110	12	119	6e-60	184	31 gene product [Enterobacteria phage IME08]
ORF085	gi|161622497|ref|YP_001595336.1|;gi|238695361|ref|YP_002922554.1|;gi|160213803|gb|ABX11142.1|;gi|220029497|gb|ACL78431.1|	83.18	91.59	107	18	0	4	110	1	107	1e-59	183	gp31 head assembly cochaperone with GroEL [Enterobacteria phage JS98]
ORF085	gi|729030245|gb|AIZ02000.1|	82.24	90.65	107	19	0	4	110	1	107	1e-58	181	head assembly cochaperone with GroEL [Enterobacteria phage vB_EcoM_VR5]
ORF085	gi|422934198|ref|YP_007004234.1|;gi|345450707|gb|AEN93910.1|	82.24	90.65	107	19	0	4	110	1	107	1e-58	181	head assembly cochaperone with GroEL [Enterobacteria phage Bp7]
ORF085	gi|308814574|ref|YP_003934848.1|;gi|308206166|gb|ADO19565.1|	79.63	88.89	108	22	0	3	110	8	115	4e-58	179	head assembly cochaperone with GroEL [Shigella phage SP18]
ORF085	gi|314121788|ref|YP_004063907.1|;gi|313151545|gb|ADR32601.1|	79.44	89.72	107	22	0	4	110	1	107	8e-58	178	gp31 head assembly cochaperone with GroEL [Enterobacteria phage vB_EcoM-VR7]
ORF086	gi|642906022|ref|YP_009037559.1|;gi|642904176|gb|AIA80196.1|	96.34	96.34	82	3	0	1	82	1	82	2e-51	160	rIII lysis inhibition accessory protein [Escherichia phage vB_EcoM_JS09]
ORF086	gi|682124481|ref|YP_009056793.1|;gi|604671916|gb|AHV82910.1|	96.34	96.34	82	3	0	1	82	1	82	2e-51	160	lysis inhibition accessory protein, rapid lysis phenotype [Escherichia phage vB_EcoM_PhAPEC2]
ORF086	gi|9632819|ref|NP_049824.1|;gi|116326429|ref|YP_803149.1|;gi|228861141|ref|YP_002854164.1|;gi|228861522|ref|YP_002854543.1|;gi|330858727|ref|YP_004415102.1|;gi|414086576|ref|YP_006986765.1|;gi|422934990|ref|YP_007004950.1|;gi|639438860|ref|YP_009030817.1|;gi|712915044|ref|YP_009102681.1|;gi|713322509|ref|YP_009098593.1|;gi|713322796|ref|YP_009102411.1|;gi|730984932|ref|YP_009111025.1|;gi|418298|s…	91.46	95.12	82	7	0	1	82	1	82	2e-49	155	rIII lysis inhibition accessory protein, rapid lysis phenotype [Enterobacteria phage T4]
ORF086	gi|729030244|gb|AIZ01999.1|	93.9	95.12	82	5	0	1	82	1	82	5e-49	154	lysis inhibition accessory protein [Enterobacteria phage vB_EcoM_VR5]
ORF086	gi|291290430|dbj|BAI83225.1|	90.24	93.9	82	8	0	1	82	1	82	5e-49	154	rIII lysis inhibition accessory protein [Enterobacteria phage AR1]
ORF086	gi|32453702|ref|NP_861911.1|;gi|19577302|emb|CAD27901.1|;gi|32350521|gb|AAP76120.1|	91.46	96.34	82	7	0	1	82	1	82	6e-49	154	rIII lysis inhibition accessory protein, rapid lysis phenotype [Enterobacteria phage RB69]
ORF086	gi|422934623|ref|YP_007004584.1|;gi|339791406|gb|AEK12463.1|	90.24	95.12	82	8	0	1	82	1	82	9e-49	153	rIII lysis inhibition accessory protein [Enterobacteria phage ime09]
ORF086	gi|299779157|ref|YP_003734351.1|;gi|422934199|ref|YP_007004235.1|;gi|298105886|gb|ADI55530.1|;gi|345450708|gb|AEN93911.1|	90.24	93.9	82	8	0	1	82	1	82	5e-48	151	rIII gene product [Enterobacteria phage IME08]
ORF086	gi|161622496|ref|YP_001595335.1|;gi|160213802|gb|ABX11141.1|	90.24	92.68	82	8	0	1	82	1	82	1e-47	150	rIII lysis inhibition accessory protein rapid lysis phenotype [Enterobacteria phage JS98]
ORF086	gi|729030524|gb|AIZ02278.1|;gi|729030816|gb|AIZ02569.1|;gi|729031108|gb|AIZ02860.1|	88.75	92.5	80	9	0	3	82	5	84	6e-46	146	lysis inhibition accessory protein [Enterobacteria phage vB_EcoM_VR20]
ORF087	gi|525334473|gb|AGR46155.1|	100	100	55	0	0	1	55	15	69	2e-31	107	hypothetical protein [Yersinia phage PST]
ORF087	gi|330858726|ref|YP_004415101.1|;gi|422934988|ref|YP_007004948.1|;gi|712915043|ref|YP_009102680.1|;gi|713322508|ref|YP_009098592.1|;gi|327397660|gb|AEA73162.1|;gi|343177542|gb|AEM00868.1|;gi|397134224|gb|AFO10731.1|;gi|398313756|emb|CCI89103.1|;gi|698040611|gb|AIT72942.1|;gi|698040883|gb|AIT73213.1|;gi|698041155|gb|AIT73484.1|;gi|698041427|gb|AIT73755.1|;gi|698041700|gb|AIT74027.1|;gi|698041974|g…	100	100	55	0	0	1	55	1	55	2e-31	107	hypothetical protein Shfl2p210 [Shigella phage Shfl2]
ORF087	gi|140030|sp|P17310.1|Y13A_BPT4;gi|15209|emb|CAA35653.1|	98.18	98.18	55	1	0	1	55	40	94	6e-31	107	RecName: Full=Uncharacterized 11.1 kDa protein in Gp30-rIII intergenic region; AltName: Full=ORF D [Enterobacteria phage T4]
ORF087	gi|116326428|ref|YP_803148.1|;gi|228861140|ref|YP_002854163.1|;gi|228861521|ref|YP_002854542.1|;gi|414086574|ref|YP_006986763.1|;gi|639438859|ref|YP_009030816.1|;gi|713322795|ref|YP_009102410.1|;gi|15794|emb|CAA38407.1|;gi|215878|gb|AAA32508.1|;gi|115344021|gb|ABI95030.1|;gi|227438537|gb|ACP30850.1|;gi|227438814|gb|ACP31126.1|;gi|291290428|dbj|BAI83223.1|;gi|296923368|emb|CBM40346.1|;gi|299780571…	98.18	98.18	55	1	0	1	55	15	69	1e-30	105	hypothetical protein RB32ORF206c [Enterobacteria phage RB32]
ORF087	gi|9632619|ref|NP_049823.1|;gi|422934622|ref|YP_007004583.1|;gi|5354243|gb|AAD42450.1|AF158101_37;gi|296923358|emb|CBM40337.1|;gi|296923376|emb|CBM40353.1|;gi|339791405|gb|AEK12462.1|;gi|628971962|gb|AHY83683.1|;gi|628972151|gb|AHY83871.1|;gi|628972345|gb|AHY84064.1|;gi|698043347|gb|AIT75668.1|	98.18	98.18	55	1	0	1	55	1	55	1e-30	105	gp30.9 conserved hypothetical protein [Enterobacteria phage T4]
ORF087	gi|32453701|ref|NP_861910.1|;gi|410492097|ref|YP_006907283.1|;gi|642906023|ref|YP_009037560.1|;gi|682124480|ref|YP_009056792.1|;gi|725950015|ref|YP_009100751.1|;gi|19577303|emb|CAD27902.1|;gi|32350520|gb|AAP76119.1|;gi|407437686|gb|AFU20446.1|;gi|604671915|gb|AHV82909.1|;gi|642904177|gb|AIA80197.1|;gi|678223651|gb|AIM50791.1|;gi|815007294|gb|AKE45071.1|;gi|815008182|gb|AKE45956.1|;gi|815009178|gb…	97.67	97.67	43	1	0	16	58	17	59	3e-22	84	gp30.9 conserved hypothetical protein [Enterobacteria phage RB69]
ORF087	gi|639438526|ref|YP_009030267.1|;gi|625370599|gb|AHY25459.1|	80	89.09	55	10	1	1	55	1	54	7e-22	82.8	hypothetical protein PS2_220 [Serratia phage PS2]
ORF087	gi|431809146|ref|YP_007236043.1|;gi|398313435|emb|CCI88784.1|	86	90	50	7	0	6	55	5	54	1e-21	82.4	gp30.9 conserved hypothetical protein [Yersinia phage phiR1-RT]
ORF087	gi|238695359|ref|YP_002922552.1|;gi|220029495|gb|ACL78429.1|;gi|729030243|gb|AIZ01998.1|	67.31	76.92	52	17	0	7	58	2	53	1e-14	64.3	gp30.9 conserved hypothetical protein [Enterobacteria phage JS10]
ORF087	gi|456351287|ref|YP_007501239.1|;gi|347466348|gb|AEO97134.1|;gi|408386881|gb|AFU63890.1|	64.81	75.93	54	18	1	1	54	1	53	2e-14	63.9	hypothetical protein [Salmonella phage S16]
ORF088	gi|642906024|ref|YP_009037561.1|;gi|642904178|gb|AIA80198.1|	100	100	122	0	0	1	122	1	122	8e-87	253	hypothetical protein JS09_0238 [Escherichia phage vB_EcoM_JS09]
ORF088	gi|682124479|ref|YP_009056791.1|;gi|604671914|gb|AHV82908.1|	99.18	100	122	1	0	1	122	1	122	4e-86	251	hypothetical protein PhAPEC2_199 [Escherichia phage vB_EcoM_PhAPEC2]
ORF088	gi|725950014|ref|YP_009100750.1|;gi|678223650|gb|AIM50790.1|	97.54	98.36	122	3	0	1	122	1	122	3e-84	246	hypothetical protein [Shigella phage Shf125875]
ORF088	gi|299779155|ref|YP_003734349.1|;gi|298105884|gb|ADI55528.1|	90.16	93.44	122	12	0	1	122	5	126	9e-78	230	30.8 gene product [Enterobacteria phage IME08]
ORF088	gi|422934621|ref|YP_007004582.1|;gi|339791404|gb|AEK12461.1|	89.34	91.8	122	13	0	1	122	1	122	2e-75	224	conserved hypothetical protein [Enterobacteria phage ime09]
ORF088	gi|729030814|gb|AIZ02567.1|	88.52	91.8	122	14	0	1	122	1	122	3e-75	223	hypothetical protein VR25_223 [Enterobacteria phage vB_EcoM_VR25]
ORF088	gi|314121785|ref|YP_004063904.1|;gi|313151542|gb|ADR32598.1|	87.7	90.98	122	15	0	1	122	1	122	1e-74	222	gp30.8 conserved hypothetical protein [Enterobacteria phage vB_EcoM-VR7]
ORF088	gi|308814570|ref|YP_003934844.1|;gi|308206162|gb|ADO19561.1|;gi|729030522|gb|AIZ02276.1|	86.89	90.98	122	16	0	1	122	1	122	5e-74	220	hypothetical protein SP18_gp221 [Shigella phage SP18]
ORF088	gi|729031106|gb|AIZ02858.1|	86.89	90.98	122	16	0	1	122	1	122	9e-74	220	hypothetical protein VR26_221 [Enterobacteria phage vB_EcoM_VR26]
ORF088	gi|296923369|emb|CBM40347.1|	87.7	90.16	122	15	0	1	122	1	122	3e-73	218	30.8 putative protein [Escherichia phage LZ1]
ORF089	gi|32453699|ref|NP_861908.1|;gi|725950013|ref|YP_009100749.1|;gi|19571829|emb|CAD27514.1|;gi|32350518|gb|AAP76117.1|;gi|678223649|gb|AIM50789.1|	98.35	99.17	121	2	0	1	121	1	121	2e-86	252	gp30.7 conserved hypothetical protein [Enterobacteria phage RB69]
ORF089	gi|73663846|emb|CAF21716.1|	98.35	98.35	121	2	0	1	121	1	121	6e-86	251	gp30.7 protein [Enterobacteria phage TuIa]
ORF089	gi|299779154|ref|YP_003734348.1|;gi|298105883|gb|ADI55527.1|	96.69	96.69	121	4	0	1	121	5	125	2e-84	247	30.7 gene product [Enterobacteria phage IME08]
ORF089	gi|161622493|ref|YP_001595332.1|;gi|160213799|gb|ABX11138.1|	96.69	96.69	121	4	0	1	121	1	121	2e-84	246	gp30.7 conserved hypothetical protein [Enterobacteria phage JS98]
ORF089	gi|422934202|ref|YP_007004238.1|;gi|345450711|gb|AEN93914.1|	95.87	95.87	121	5	0	1	121	1	121	5e-84	246	conserved hypothetical protein [Enterobacteria phage Bp7]
ORF089	gi|410492098|ref|YP_006907284.1|;gi|407437687|gb|AFU20447.1|	94.21	98.35	121	7	0	1	121	1	121	9e-84	245	hypothetical protein HX01_0237 [Enterobacteria phage HX01]
ORF089	gi|729030241|gb|AIZ01996.1|	95.04	97.52	121	6	0	1	121	1	121	2e-83	244	hypothetical protein VR5_209 [Enterobacteria phage vB_EcoM_VR5]
ORF089	gi|642906025|ref|YP_009037562.1|;gi|642904179|gb|AIA80199.1|	94.21	98.35	121	7	0	1	121	1	121	3e-83	244	hypothetical protein JS09_0239 [Escherichia phage vB_EcoM_JS09]
ORF089	gi|682124478|ref|YP_009056790.1|;gi|604671913|gb|AHV82907.1|	95.04	96.69	121	6	0	1	121	1	121	5e-83	243	hypothetical protein PhAPEC2_198 [Escherichia phage vB_EcoM_PhAPEC2]
ORF089	gi|330858724|ref|YP_004415099.1|;gi|414086572|ref|YP_006986761.1|;gi|422934620|ref|YP_007004581.1|;gi|730984930|ref|YP_009111023.1|;gi|14588816|emb|CAC43011.1|;gi|327397658|gb|AEA73160.1|;gi|339791403|gb|AEK12460.1|;gi|383396353|gb|AFH20169.1|;gi|525334471|gb|AGR46153.1|;gi|587757319|gb|AHK11052.1|;gi|694817643|gb|AIS73525.1|	94.21	96.69	121	7	0	1	121	1	121	1e-82	242	hypothetical protein Shfl2p208 [Shigella phage Shfl2]
ORF090	gi|73663847|emb|CAF21717.1|	95.1	97.55	204	10	0	1	204	1	204	3e-146	410	gp30.6A protein [Enterobacteria phage TuIa]
ORF090	gi|642906026|ref|YP_009037563.1|;gi|642904180|gb|AIA80200.1|	95.59	96.57	204	9	0	1	204	1	204	1e-145	409	hypothetical protein JS09_0240 [Escherichia phage vB_EcoM_JS09]
ORF090	gi|308814571|ref|YP_003934845.1|;gi|308206163|gb|ADO19562.1|	73.21	82.14	56	15	0	129	184	46	101	2e-22	90.9	hypothetical protein SP18_gp222 [Shigella phage SP18]
ORF090	gi|642905965|ref|YP_009037496.1|;gi|642904119|gb|AIA80139.1|	32.95	50	88	54	3	2	84	5	92	0.014	35.8	mRNA metabolism modulator [Escherichia phage vB_EcoM_JS09]
ORF090	gi|725949813|ref|YP_009100549.1|;gi|678223449|gb|AIM50589.1|	32.95	48.86	88	54	3	2	84	5	92	0.018	35.8	mRNA metabolism modulator [Shigella phage Shf125875]
ORF090	gi|32453491|ref|NP_861697.1|;gi|32350310|gb|AAP75909.1|	32.95	48.86	88	54	3	2	84	5	92	0.025	35.4	goF mRNA metabolism modulator [Enterobacteria phage RB69]
ORF090	gi|682124287|ref|YP_009056599.1|;gi|604671722|gb|AHV82716.1|	32.95	50	88	54	3	2	84	5	92	0.036	35	mRNA metabolism modulator [Escherichia phage vB_EcoM_PhAPEC2]
ORF090	gi|658307658|ref|YP_009043502.1|;gi|641468188|gb|AIA64295.1|	28.79	46.97	66	41	2	37	102	41	100	1.1	30.4	hypothetical protein [Listeria phage List-36]
ORF090	gi|398313551|emb|CCI88898.1|	27.27	48.86	88	59	3	2	84	5	92	1.9	30	protein of unknown function [Yersinia phage phiD1]
ORF090	gi|764447396|ref|WP_044370032.1|;gi|589889950|ref|YP_009005486.1|;gi|583927863|gb|AHI61125.1|	29.41	54.9	51	35	1	30	80	37	86	2.4	29.6	hypothetical protein PG7_222 [Enterobacter phage PG7]
ORF091	gi|642906027|ref|YP_009037564.1|;gi|642904181|gb|AIA80201.1|	95.38	96.92	65	3	0	1	65	1	65	4e-38	125	hypothetical protein JS09_0241 [Escherichia phage vB_EcoM_JS09]
ORF091	gi|73663848|emb|CAF21718.1|	98.39	100	62	1	0	1	62	1	62	5e-38	124	gp30.5 protein [Enterobacteria phage TuIa]
ORF091	gi|729030238|gb|AIZ01993.1|	66.67	76.19	63	21	0	1	63	1	63	8e-23	85.9	hypothetical protein VR5_206 [Enterobacteria phage vB_EcoM_VR5]
ORF091	gi|116326424|ref|YP_803144.1|;gi|115344017|gb|ABI95026.1|;gi|698042517|gb|AIT74841.1|	65.62	71.88	64	22	0	1	64	1	64	2e-22	84.7	hypothetical protein RB32ORF202c [Enterobacteria phage RB32]
ORF091	gi|314121782|ref|YP_004063901.1|;gi|313151539|gb|ADR32595.1|	66.67	76.19	63	21	0	1	63	1	63	4e-22	84	gp30.5 conserved hypothetical protein [Enterobacteria phage vB_EcoM-VR7]
ORF091	gi|228861136|ref|YP_002854159.1|;gi|228861517|ref|YP_002854538.1|;gi|422934984|ref|YP_007004944.1|;gi|712915039|ref|YP_009102676.1|;gi|713322504|ref|YP_009098588.1|;gi|227438533|gb|ACP30846.1|;gi|227438810|gb|ACP31122.1|;gi|343177538|gb|AEM00864.1|;gi|397134220|gb|AFO10727.1|;gi|398313752|emb|CCI89099.1|;gi|698040607|gb|AIT72938.1|;gi|698040879|gb|AIT73209.1|;gi|698041151|gb|AIT73480.1|;gi|698041…	64.06	73.44	64	23	0	1	64	1	64	4e-22	84	gp30.5 hypothetical protein [Enterobacteria phage RB51]
ORF091	gi|729031103|gb|AIZ02855.1|	68.25	74.6	63	20	0	1	63	1	63	5e-22	84	hypothetical protein VR26_218 [Enterobacteria phage vB_EcoM_VR26]
ORF091	gi|9632615|ref|NP_049819.1|;gi|330858722|ref|YP_004415097.1|;gi|713322791|ref|YP_009102406.1|;gi|418324|sp|Q02406.1|Y12J_BPT4;gi|5354239|gb|AAD42446.1|AF158101_33;gi|15853|emb|CAA42705.1|;gi|291290422|dbj|BAI83217.1|;gi|296923372|emb|CBM40350.1|;gi|299780567|gb|ADJ39929.1|;gi|327397656|gb|AEA73158.1|;gi|525334469|gb|AGR46151.1|;gi|628971949|gb|AHY83670.1|;gi|628972138|gb|AHY83858.1|;gi|628972333|…	64.06	73.44	64	23	0	1	64	1	64	5e-22	83.6	gp30.5 hypothetical protein [Enterobacteria phage T4]
ORF091	gi|161622491|ref|YP_001595330.1|;gi|238695357|ref|YP_002922550.1|;gi|160213797|gb|ABX11136.1|;gi|220029493|gb|ACL78427.1|	65.08	71.43	63	22	0	1	63	1	63	6e-22	83.6	gp30.5 hypothetical protein [Enterobacteria phage JS98]
ORF091	gi|414086570|ref|YP_006986759.1|;gi|383396351|gb|AFH20167.1|	62.5	73.44	64	24	0	1	64	1	64	6e-22	83.6	hypothetical protein ACG-C40_0203 [Enterobacteria phage vB_EcoM_ACG-C40]
ORF092	gi|682124476|ref|YP_009056788.1|;gi|604671911|gb|AHV82905.1|	98.61	98.61	72	1	0	1	72	1	72	6e-47	147	hypothetical protein PhAPEC2_196 [Escherichia phage vB_EcoM_PhAPEC2]
ORF092	gi|725950011|ref|YP_009100747.1|;gi|678223647|gb|AIM50787.1|	97.22	97.22	72	2	0	1	72	1	72	9e-46	145	hypothetical protein [Shigella phage Shf125875]
ORF092	gi|32453697|ref|NP_861906.1|;gi|19584262|emb|CAD28420.1|;gi|32350516|gb|AAP76115.1|	88.89	90.28	72	7	1	1	72	1	71	4e-39	128	gp30.4 conserved hypothetical protein [Enterobacteria phage RB69]
ORF092	gi|161622490|ref|YP_001595329.1|;gi|238695356|ref|YP_002922549.1|;gi|160213796|gb|ABX11135.1|;gi|220029492|gb|ACL78426.1|	75	88.89	72	17	1	1	72	1	71	4e-33	112	gp30.4 conserved hypothetical protein [Enterobacteria phage JS98]
ORF092	gi|422934205|ref|YP_007004241.1|;gi|345450714|gb|AEN93917.1|	75	86.11	72	17	1	1	72	1	71	1e-32	111	conserved hypothetical protein [Enterobacteria phage Bp7]
ORF092	gi|410492099|ref|YP_006907285.1|;gi|642906028|ref|YP_009037565.1|;gi|407437688|gb|AFU20448.1|;gi|642904182|gb|AIA80202.1|	72.22	83.33	72	18	1	1	72	1	70	2e-31	108	hypothetical protein HX01_0240 [Enterobacteria phage HX01]
ORF092	gi|422934618|ref|YP_007004579.1|;gi|339791401|gb|AEK12458.1|	70.83	81.94	72	20	1	1	72	1	71	3e-30	105	conserved hypothetical protein [Enterobacteria phage ime09]
ORF092	gi|730984928|ref|YP_009111021.1|;gi|694817641|gb|AIS73523.1|	69.44	80.56	72	21	1	1	72	1	71	4e-30	105	hypothetical protein pSs1_00213 [Shigella phage pSs-1]
ORF092	gi|314121781|ref|YP_004063900.1|;gi|313151538|gb|ADR32594.1|	72.22	80.56	72	18	2	1	72	1	70	2e-29	103	gp30.4 conserved hypothetical protein [Enterobacteria phage vB_EcoM-VR7]
ORF092	gi|729030810|gb|AIZ02563.1|	70.83	81.94	72	19	2	1	72	1	70	4e-29	102	hypothetical protein VR25_219 [Enterobacteria phage vB_EcoM_VR25]
ORF093	gi|642906029|ref|YP_009037566.1|;gi|642904183|gb|AIA80203.1|	98.68	99.34	152	2	0	1	152	1	152	4e-109	312	hypothetical protein JS09_0243 [Escherichia phage vB_EcoM_JS09]
ORF093	gi|725950010|ref|YP_009100746.1|;gi|678223646|gb|AIM50786.1|	98.68	98.68	152	2	0	1	152	1	152	9e-109	311	hypothetical protein [Shigella phage Shf125875]
ORF093	gi|291290420|dbj|BAI83215.1|	97.37	98.03	152	4	0	1	152	1	152	8e-107	306	conserved hypothetical protein [Enterobacteria phage AR1]
ORF093	gi|228861134|ref|YP_002854157.1|;gi|228861515|ref|YP_002854536.1|;gi|215541382|emb|CAJ76661.1|;gi|215541399|emb|CAJ76672.1|;gi|215541405|emb|CAJ76676.1|;gi|227438531|gb|ACP30844.1|;gi|227438808|gb|ACP31120.1|	96.05	98.03	152	6	0	1	152	1	152	1e-106	305	gp30.3 hypothetical protein [Enterobacteria phage RB51]
ORF093	gi|215541402|emb|CAJ76674.1|;gi|215541411|emb|CAJ76680.1|	97.37	98.03	152	4	0	1	152	1	152	2e-106	305	gp30.3 protein [Enterobacteria phage KC69]
ORF093	gi|25809142|emb|CAD30248.1|	96.71	98.03	152	5	0	1	152	1	152	2e-106	305	gp30.3 protein [Enterobacteria phage LZ4]
ORF093	gi|639438853|ref|YP_009030810.1|;gi|713322789|ref|YP_009102404.1|;gi|25809126|emb|CAD30236.1|;gi|215541393|emb|CAJ76668.1|;gi|628971681|gb|AHY83403.1|;gi|698042241|gb|AIT74566.1|	96.71	98.03	152	5	0	1	152	1	152	2e-106	305	hypothetical protein e112_213 [Escherichia phage e11/2]
ORF093	gi|25809134|emb|CAD30242.1|	96.71	97.37	152	5	0	1	152	1	152	4e-106	304	gp30.3 protein [Enterobacteria phage Pol]
ORF093	gi|215541379|emb|CAJ76659.1|	96.05	98.03	152	6	0	1	152	1	152	5e-106	304	gp30.3 protein [Enterobacteria phage TuIb]
ORF093	gi|25809150|emb|CAD30254.1|	95.39	97.37	152	7	0	1	152	1	152	1e-105	303	gp30.3 protein [Enterobacteria phage LZ10]
ORF094	gi|682124474|ref|YP_009056786.1|;gi|604671909|gb|AHV82903.1|	98.18	98.91	274	5	0	1	274	1	274	0	561	hypothetical protein PhAPEC2_194 [Escherichia phage vB_EcoM_PhAPEC2]
ORF094	gi|725950009|ref|YP_009100745.1|;gi|678223645|gb|AIM50785.1|	96.72	97.08	274	6	1	1	274	1	271	0	546	hypothetical protein [Shigella phage Shf125875]
ORF094	gi|32453695|ref|NP_861904.1|;gi|32350514|gb|AAP76113.1|	95.99	96.72	274	8	1	1	274	1	271	0	543	hypothetical protein RB69p214 [Enterobacteria phage RB69]
ORF094	gi|642906030|ref|YP_009037567.1|;gi|642904184|gb|AIA80204.1|	95.26	96.72	274	10	1	1	274	1	271	0	539	hypothetical protein JS09_0244 [Escherichia phage vB_EcoM_JS09]
ORF094	gi|57975098|emb|CAF21730.1|	70.88	81.99	261	68	2	1	253	1	261	8e-132	379	gp30.2 [Enterobacteria phage TuIb]
ORF094	gi|587757314|gb|AHK11047.1|	72.37	81.32	257	57	2	1	257	1	243	3e-131	378	haloacid dehalogenase-like hydrolase domain-containing protein [Escherichia phage HY01]
ORF094	gi|730984926|ref|YP_009111019.1|;gi|694817639|gb|AIS73521.1|	70.88	81.23	261	68	2	1	253	1	261	8e-131	377	hypothetical protein pSs1_00211 [Shigella phage pSs-1]
ORF094	gi|422934616|ref|YP_007004577.1|;gi|339791399|gb|AEK12456.1|	71.37	81.3	262	66	3	1	253	1	262	1e-130	377	phage protein [Enterobacteria phage ime09]
ORF094	gi|525334466|gb|AGR46148.1|	71.98	80.93	257	58	2	1	257	1	243	2e-130	377	hypothetical protein [Yersinia phage PST]
ORF094	gi|639438852|ref|YP_009030809.1|;gi|628971680|gb|AHY83402.1|	70.61	81.68	262	68	3	1	253	1	262	3e-130	375	hypothetical protein e112_212 [Escherichia phage e11/2]
ORF095	gi|410492100|ref|YP_006907286.1|;gi|642906031|ref|YP_009037568.1|;gi|682124473|ref|YP_009056785.1|;gi|407437689|gb|AFU20449.1|;gi|604671908|gb|AHV82902.1|;gi|642904185|gb|AIA80205.1|	100	100	89	0	0	1	89	1	89	3e-61	185	hypothetical protein HX01_0243 [Enterobacteria phage HX01]
ORF095	gi|725950008|ref|YP_009100744.1|;gi|678223644|gb|AIM50784.1|;gi|815007302|gb|AKE45079.1|;gi|815008174|gb|AKE45948.1|;gi|815009170|gb|AKE46937.1|	98.88	100	89	1	0	1	89	1	89	1e-60	184	hypothetical protein [Shigella phage Shf125875]
ORF095	gi|32453694|ref|NP_861903.1|;gi|32350513|gb|AAP76112.1|	97.75	97.75	89	2	0	1	89	1	89	1e-58	179	gp30.1 conserved hypothetical protein [Enterobacteria phage RB69]
ORF095	gi|115430594|emb|CAJ32725.1|	57.65	74.12	85	33	3	1	84	1	83	1e-24	92.4	gp30.1 [Enterobacteria phage RB23]
ORF095	gi|330858718|ref|YP_004415093.1|;gi|422934615|ref|YP_007004576.1|;gi|327397652|gb|AEA73154.1|;gi|339791398|gb|AEK12455.1|	57.65	72.94	85	33	3	1	84	1	83	1e-24	92	hypothetical protein Shfl2p202 [Shigella phage Shfl2]
ORF095	gi|587757313|gb|AHK11046.1|	57.65	72.94	85	33	3	1	84	1	83	2e-24	91.7	hypothetical protein HY01_0189 [Escherichia phage HY01]
ORF095	gi|414086566|ref|YP_006986755.1|;gi|422934980|ref|YP_007004940.1|;gi|343177534|gb|AEM00860.1|;gi|383396347|gb|AFH20163.1|;gi|815008438|gb|AKE46211.1|	57.65	72.94	85	33	3	1	84	1	83	2e-24	91.7	hypothetical protein ACG-C40_0199 [Enterobacteria phage vB_EcoM_ACG-C40]
ORF095	gi|115430620|emb|CAJ32738.1|;gi|115430622|emb|CAJ32739.1|	57.65	72.94	85	33	3	1	84	1	83	2e-24	91.7	gp30.1 [Enterobacteria phage U4]
ORF095	gi|9632610|ref|NP_049814.1|;gi|418320|sp|P33084.1|Y12E_BPT4;gi|5354234|gb|AAD42441.1|AF158101_28;gi|15339|emb|CAA24920.1|;gi|299780562|gb|ADJ39924.1|;gi|628971914|gb|AHY83635.1|;gi|628972299|gb|AHY84018.1|;gi|698042788|gb|AIT75111.1|;gi|698043063|gb|AIT75385.1|	57.65	72.94	85	33	3	1	84	1	83	2e-24	91.7	gp30.1 conserved hypothetical protein [Enterobacteria phage T4]
ORF095	gi|525334465|gb|AGR46147.1|	57.65	72.94	85	33	3	1	84	1	83	3e-24	91.3	hypothetical protein [Yersinia phage PST]
ORF096	gi|642906032|ref|YP_009037569.1|;gi|642904186|gb|AIA80206.1|;gi|815007303|gb|AKE45080.1|;gi|815008173|gb|AKE45947.1|;gi|815009169|gb|AKE46936.1|	99.8	99.8	497	1	0	1	497	1	497	0	1020	DNA ligase [Escherichia phage vB_EcoM_JS09]
ORF096	gi|682124472|ref|YP_009056784.1|;gi|604671907|gb|AHV82901.1|	99.6	99.6	497	2	0	1	497	1	497	0	1018	ATP-dependent DNA ligase [Escherichia phage vB_EcoM_PhAPEC2]
ORF096	gi|725950007|ref|YP_009100743.1|;gi|678223643|gb|AIM50783.1|	99.6	99.6	497	2	0	1	497	1	497	0	1018	DNA ligase [Shigella phage Shf125875]
ORF096	gi|32453693|ref|NP_861902.1|;gi|32350512|gb|AAP76111.1|	99.2	99.6	497	4	0	1	497	1	497	0	1014	DNA ligase [Enterobacteria phage RB69]
ORF096	gi|299779147|ref|YP_003734341.1|;gi|298105876|gb|ADI55520.1|	76.14	85.69	503	112	4	1	497	14	514	0	778	30 gene product [Enterobacteria phage IME08]
ORF096	gi|238695352|ref|YP_002922545.1|;gi|220029488|gb|ACL78422.1|	75.25	83.89	509	112	5	1	497	1	507	0	766	gp30 DNA ligase [Enterobacteria phage JS10]
ORF096	gi|422934209|ref|YP_007004245.1|;gi|345450718|gb|AEN93921.1|	75.05	83.5	509	113	5	1	497	7	513	0	765	DNA ligase [Enterobacteria phage Bp7]
ORF096	gi|161622486|ref|YP_001595325.1|;gi|160213792|gb|ABX11131.1|	75.05	83.5	509	113	5	1	497	1	507	0	764	gp30 DNA ligase [Enterobacteria phage JS98]
ORF096	gi|729030232|gb|AIZ01987.1|	75.05	82.91	509	113	5	1	497	1	507	0	759	DNA ligase [Enterobacteria phage vB_EcoM_VR5]
ORF096	gi|729030513|gb|AIZ02267.1|	67.58	76.95	512	148	7	1	497	1	509	0	662	DNA ligase [Enterobacteria phage vB_EcoM_VR20]
ORF097	gi|32453692|ref|NP_861901.1|;gi|32350511|gb|AAP76110.1|	91.94	95.16	62	5	0	1	62	1	62	8e-37	121	Alt.1 conserved hypothetical protein [Enterobacteria phage RB69]
ORF097	gi|410492101|ref|YP_006907287.1|;gi|642906033|ref|YP_009037570.1|;gi|682124471|ref|YP_009056783.1|;gi|725950006|ref|YP_009100742.1|;gi|407437690|gb|AFU20450.1|;gi|604671906|gb|AHV82900.1|;gi|642904187|gb|AIA80207.1|;gi|678223642|gb|AIM50782.1|	85.48	91.94	62	9	0	1	62	1	62	2e-33	112	hypothetical protein HX01_0245 [Enterobacteria phage HX01]
ORF097	gi|398313746|emb|CCI89093.1|	63.33	83.33	60	22	0	1	60	1	60	3e-23	86.7	protein of unknown function [Yersinia phage phiD1]
ORF097	gi|330858716|ref|YP_004415091.1|;gi|422934978|ref|YP_007004938.1|;gi|713322498|ref|YP_009098582.1|;gi|713322785|ref|YP_009102400.1|;gi|327397650|gb|AEA73152.1|;gi|343177532|gb|AEM00858.1|;gi|587757311|gb|AHK11044.1|;gi|698040601|gb|AIT72932.1|;gi|698040873|gb|AIT73203.1|;gi|698041145|gb|AIT73474.1|;gi|698041417|gb|AIT73745.1|;gi|698041690|gb|AIT74017.1|;gi|698041964|gb|AIT74290.1|;gi|698042237|gb…	61.67	83.33	60	23	0	1	60	1	60	5e-23	86.3	hypothetical protein Shfl2p200 [Shigella phage Shfl2]
ORF097	gi|414086564|ref|YP_006986753.1|;gi|383396345|gb|AFH20161.1|	61.67	83.33	60	23	0	1	60	1	60	7e-23	85.9	hypothetical protein ACG-C40_0197 [Enterobacteria phage vB_EcoM_ACG-C40]
ORF097	gi|9632706|ref|NP_049812.1|;gi|116326418|ref|YP_803138.1|;gi|228861130|ref|YP_002854153.1|;gi|228861511|ref|YP_002854532.1|;gi|422934613|ref|YP_007004574.1|;gi|712915033|ref|YP_009102670.1|;gi|730984923|ref|YP_009111016.1|;gi|731236|sp|P39496.1|Y12D_BPT4;gi|5354330|gb|AAD42537.1|AF158101_124;gi|115344011|gb|ABI95020.1|;gi|227438527|gb|ACP30840.1|;gi|227438804|gb|ACP31116.1|;gi|291290416|dbj|BAI83…	63.33	83.33	60	22	0	1	60	1	60	8e-23	85.5	Alt.1 conserved hypothetical protein [Enterobacteria phage T4]
ORF097	gi|639438849|ref|YP_009030806.1|;gi|628971677|gb|AHY83399.1|	60	81.67	60	24	0	1	60	1	60	2e-22	84.3	hypothetical protein e112_209 [Escherichia phage e11/2]
ORF097	gi|422934210|ref|YP_007004246.1|;gi|345450719|gb|AEN93922.1|	63.33	80	60	22	0	1	60	1	60	3e-22	84	conserved hypothetical protein [Enterobacteria phage Bp7]
ORF097	gi|729030231|gb|AIZ01986.1|	55.38	70.77	65	25	1	1	61	1	65	6e-19	75.9	hypothetical protein VR5_199 [Enterobacteria phage vB_EcoM_VR5]
ORF097	gi|161622485|ref|YP_001595324.1|;gi|160213791|gb|ABX11130.1|	53.33	70	60	24	1	1	60	1	56	2e-14	63.9	Alt.1 conserved hypothetical protein [Enterobacteria phage JS98]
ORF098	gi|642906034|ref|YP_009037571.1|;gi|642904188|gb|AIA80208.1|	99.42	99.57	695	4	0	1	695	1	695	0	1411	ADP-ribosyltransferase [Escherichia phage vB_EcoM_JS09]
ORF098	gi|682124470|ref|YP_009056782.1|;gi|604671905|gb|AHV82899.1|	99.14	99.57	695	6	0	1	695	1	695	0	1409	ADP-ribosyltransferase [Escherichia phage vB_EcoM_PhAPEC2]
ORF098	gi|725950005|ref|YP_009100741.1|;gi|678223641|gb|AIM50781.1|	98.71	99.42	695	9	0	1	695	1	695	0	1402	RNA polymerase ADP-ribosylase [Shigella phage Shf125875]
ORF098	gi|32453691|ref|NP_861900.1|;gi|32350510|gb|AAP76109.1|	91.86	93.86	700	47	3	1	695	1	695	0	1291	ADP-ribosyltransferase [Enterobacteria phage RB69]
ORF098	gi|161622484|ref|YP_001595323.1|;gi|160213790|gb|ABX11129.1|	72.84	85.06	696	187	2	1	695	1	695	0	1046	Alt RNA polymerase ADP-ribosylase [Enterobacteria phage JS98]
ORF098	gi|238695350|ref|YP_002922543.1|;gi|220029486|gb|ACL78420.1|	57.14	72.42	707	278	8	1	695	1	694	0	792	Alt RNA polymerase ADP-ribosylase [Enterobacteria phage JS10]
ORF098	gi|299779145|ref|YP_003734339.1|;gi|298105874|gb|ADI55518.1|	57	72.56	707	279	8	1	695	3	696	0	791	alta gene product [Enterobacteria phage IME08]
ORF098	gi|422934211|ref|YP_007004247.1|;gi|345450720|gb|AEN93923.1|	56.72	72.56	707	281	8	1	695	1	694	0	785	ADP-ribosylase [Enterobacteria phage Bp7]
ORF098	gi|729030230|gb|AIZ01985.1|	54.56	70.23	702	289	9	4	695	3	684	0	723	putative ADP-ribosyltransferase [Enterobacteria phage vB_EcoM_VR5]
ORF098	gi|3913025|sp|Q38433.1|ALT_BPT6;gi|15423|emb|CAA49518.1|	46.3	66.67	702	366	7	1	695	1	698	0	650	RecName: Full=NAD--protein ADP-ribosyltransferase; Short=Alt protein [Enterobacteria phage T6]
ORF099	gi|642906035|ref|YP_009037572.1|;gi|642904189|gb|AIA80209.1|	98.97	100	97	1	0	1	97	1	97	9e-66	197	hypothetical protein JS09_0249 [Escherichia phage vB_EcoM_JS09]
ORF099	gi|32453690|ref|NP_861899.1|;gi|32350509|gb|AAP76108.1|	97.94	98.97	97	2	0	1	97	1	97	1e-64	195	Alt.-3 conserved hypothetical protein [Enterobacteria phage RB69]
ORF099	gi|410492102|ref|YP_006907288.1|;gi|407437691|gb|AFU20451.1|	96.91	97.94	97	3	0	1	97	1	97	2e-64	194	hypothetical protein HX01_0247 [Enterobacteria phage HX01]
ORF099	gi|725950004|ref|YP_009100740.1|;gi|678223640|gb|AIM50780.1|	96.91	98.97	97	3	0	1	97	1	97	2e-64	194	hypothetical protein [Shigella phage Shf125875]
ORF099	gi|682124469|ref|YP_009056781.1|;gi|604671904|gb|AHV82898.1|	96.91	97.94	97	3	0	1	97	1	97	3e-64	194	hypothetical protein PhAPEC2_189 [Escherichia phage vB_EcoM_PhAPEC2]
ORF099	gi|729030228|gb|AIZ01983.1|	51.55	63.92	97	46	1	1	97	1	96	4e-25	94	hypothetical protein VR5_196 [Enterobacteria phage vB_EcoM_VR5]
ORF099	gi|161622625|ref|YP_001595321.1|;gi|52139951|gb|AAU29321.1|	50.52	63.92	97	47	1	1	97	1	96	5e-25	93.6	Alt.-3 conserved hypothetical protein [Enterobacteria phage JS98]
ORF099	gi|238695348|ref|YP_002922541.1|;gi|220029484|gb|ACL78418.1|	50.52	63.92	97	47	1	1	97	1	96	5e-25	93.6	Alt.-3 conserved hypothetical protein [Enterobacteria phage JS10]
ORF099	gi|308814559|ref|YP_003934833.1|;gi|308206151|gb|ADO19550.1|	49.48	65.98	97	48	1	1	97	12	107	8e-25	93.6	hypothetical protein SP18_gp210 [Shigella phage SP18]
ORF099	gi|422934213|ref|YP_007004249.1|;gi|345450722|gb|AEN93925.1|	51.55	63.92	97	46	1	1	97	1	96	1e-24	92.8	conserved hypothetical protein [Enterobacteria phage Bp7]
ORF100	gi|725950003|ref|YP_009100739.1|;gi|678223639|gb|AIM50779.1|	100	100	320	0	0	1	320	1	320	0	653	baseplate tail tube junction [Shigella phage Shf125875]
ORF100	gi|682124468|ref|YP_009056780.1|;gi|604671903|gb|AHV82897.1|	99.69	100	320	1	0	1	320	1	320	0	652	baseplate tail tube initiator [Escherichia phage vB_EcoM_PhAPEC2]
ORF100	gi|32453689|ref|NP_861898.1|;gi|32350508|gb|AAP76107.1|	99.38	100	320	2	0	1	320	1	320	0	652	baseplate subunit [Enterobacteria phage RB69]
ORF100	gi|642905804|ref|YP_009037573.1|;gi|642903958|gb|AIA79978.1|	99.06	99.06	320	3	0	1	320	1	320	0	647	baseplate subunit [Escherichia phage vB_EcoM_JS09]
ORF100	gi|730984919|ref|YP_009111012.1|;gi|694817632|gb|AIS73514.1|	85.58	94.67	319	46	0	1	319	1	319	0	563	hypothetical protein pSs1_00204 [Shigella phage pSs-1]
ORF100	gi|228861126|ref|YP_002854149.1|;gi|422934974|ref|YP_007004934.1|;gi|227438800|gb|ACP31112.1|;gi|291290412|dbj|BAI83207.1|;gi|343177528|gb|AEM00854.1|;gi|698043333|gb|AIT75654.1|;gi|815008432|gb|AKE46205.1|	85.27	94.67	319	47	0	1	319	1	319	0	562	gp54 base plate-tail tube initiator [Enterobacteria phage RB51]
ORF100	gi|713322494|ref|YP_009098578.1|;gi|698040597|gb|AIT72928.1|;gi|698040869|gb|AIT73199.1|;gi|698041141|gb|AIT73470.1|;gi|698041413|gb|AIT73741.1|;gi|698041686|gb|AIT74013.1|;gi|698041960|gb|AIT74286.1|	85.27	94.67	319	47	0	1	319	1	319	0	552	base plate-tail tube initiator [Enterobacteria phage RB3]
ORF100	gi|116326414|ref|YP_803134.1|;gi|115344007|gb|ABI95016.1|;gi|698042507|gb|AIT74831.1|	85.58	94.67	319	46	0	1	319	1	319	0	552	base plate-tail tube initiator [Enterobacteria phage RB32]
ORF100	gi|712915030|ref|YP_009102667.1|;gi|299780555|gb|ADJ39917.1|;gi|397134211|gb|AFO10718.1|;gi|398313742|emb|CCI89089.1|;gi|698042781|gb|AIT75104.1|;gi|698043056|gb|AIT75378.1|	85.27	94.67	319	47	0	1	319	1	319	0	551	hypothetical protein ECML134_192 [Escherichia phage ECML-134]
ORF100	gi|713322781|ref|YP_009102396.1|;gi|525334460|gb|AGR46142.1|;gi|698042233|gb|AIT74558.1|	85.27	94.67	319	47	0	1	319	1	319	0	551	base plate-tail tube initiator [Enterobacteria phage RB27]
ORF101	gi|725950002|ref|YP_009100738.1|;gi|678223638|gb|AIM50778.1|;gi|815007308|gb|AKE45085.1|;gi|815008168|gb|AKE45942.1|;gi|815009164|gb|AKE46931.1|	100	100	369	0	0	1	369	1	369	0	753	baseplate tail tube junction [Shigella phage Shf125875]
ORF101	gi|642905805|ref|YP_009037574.1|;gi|642903959|gb|AIA79979.1|	99.73	100	369	1	0	1	369	1	369	0	753	baseplate subunit [Escherichia phage vB_EcoM_JS09]
ORF101	gi|32453688|ref|NP_861897.1|;gi|682124467|ref|YP_009056779.1|;gi|32350507|gb|AAP76106.1|;gi|604671902|gb|AHV82896.1|	99.73	100	369	1	0	1	369	1	369	0	752	baseplate subunit [Enterobacteria phage RB69]
ORF101	gi|414086559|ref|YP_006986748.1|;gi|383396340|gb|AFH20156.1|	80.22	88.89	369	68	3	1	369	1	364	0	597	baseplate tail tube cap [Enterobacteria phage vB_EcoM_ACG-C40]
ORF101	gi|730984918|ref|YP_009111011.1|;gi|694817631|gb|AIS73513.1|	79.95	88.62	369	69	3	1	369	1	364	0	594	hypothetical protein pSs1_00203 [Shigella phage pSs-1]
ORF101	gi|228861125|ref|YP_002854148.1|;gi|422934973|ref|YP_007004933.1|;gi|227438799|gb|ACP31111.1|;gi|291290411|dbj|BAI83206.1|;gi|343177527|gb|AEM00853.1|;gi|698043332|gb|AIT75653.1|;gi|815008431|gb|AKE46204.1|	79.67	88.62	369	70	3	1	369	1	364	0	594	gp48 base plate [Enterobacteria phage RB51]
ORF101	gi|639438843|ref|YP_009030800.1|;gi|628971671|gb|AHY83393.1|	78.05	88.35	369	76	3	1	369	1	364	0	580	baseplate tail tube cap [Escherichia phage e11/2]
ORF101	gi|116326413|ref|YP_803133.1|;gi|228861506|ref|YP_002854527.1|;gi|713322780|ref|YP_009102395.1|;gi|115344006|gb|ABI95015.1|;gi|227438522|gb|ACP30835.1|;gi|398313741|emb|CCI89088.1|;gi|525334459|gb|AGR46141.1|;gi|698042232|gb|AIT74557.1|;gi|698042506|gb|AIT74830.1|	78.05	88.08	369	76	3	1	369	1	364	0	580	base plate [Enterobacteria phage RB32]
ORF101	gi|330858711|ref|YP_004415086.1|;gi|422934608|ref|YP_007004569.1|;gi|327397645|gb|AEA73147.1|;gi|339791391|gb|AEK12448.1|;gi|587757306|gb|AHK11039.1|	78.32	88.08	369	75	3	1	369	1	364	0	579	putative baseplate tail tube cap [Shigella phage Shfl2]
ORF101	gi|712915029|ref|YP_009102666.1|;gi|397134210|gb|AFO10717.1|	77.78	88.08	369	77	3	1	369	1	364	0	578	baseplate protein [Escherichia phage ECML-134]
ORF102	gi|682124466|ref|YP_009056778.1|;gi|604671901|gb|AHV82895.1|	99.32	99.32	590	4	0	1	590	1	590	0	1179	baseplate hub subunit, tail length determinator [Escherichia phage vB_EcoM_PhAPEC2]
ORF102	gi|32453687|ref|NP_861896.1|;gi|32350506|gb|AAP76105.1|	99.32	99.32	590	4	0	1	590	1	590	0	1179	gp29 baseplate hub subunit, tail length determinator [Enterobacteria phage RB69]
ORF102	gi|725950001|ref|YP_009100737.1|;gi|678223637|gb|AIM50777.1|	98.98	99.49	590	6	0	1	590	1	590	0	1178	tape measure protein [Shigella phage Shf125875]
ORF102	gi|642905806|ref|YP_009037575.1|;gi|642903960|gb|AIA79980.1|	99.15	99.49	590	5	0	1	590	1	590	0	1177	baseplate hub subunit, tail length determinator [Escherichia phage vB_EcoM_JS09]
ORF102	gi|698041684|gb|AIT74011.1|	58.99	74.12	595	231	7	2	590	3	590	0	686	baseplate hub subunit tail length determinator [Enterobacteria phage RB9]
ORF102	gi|525334458|gb|AGR46140.1|	58.82	73.95	595	232	7	2	590	3	590	0	684	baseplate hub subunit [Yersinia phage PST]
ORF102	gi|228861505|ref|YP_002854526.1|;gi|227438521|gb|ACP30834.1|	58.82	74.12	595	232	7	2	590	3	590	0	683	gp29 base plate hub [Enterobacteria phage RB14]
ORF102	gi|9632606|ref|NP_049805.1|;gi|137988|sp|P13337.1|TMP_BPT4;gi|5354230|gb|AAD42437.1|AF158101_24;gi|215946|gb|AAA32538.1|	58.82	74.12	595	232	7	2	590	3	590	0	682	gp29 baseplate hub subunit, tail length determinator [Enterobacteria phage T4]
ORF102	gi|299780553|gb|ADJ39915.1|;gi|698042779|gb|AIT75102.1|;gi|698043054|gb|AIT75376.1|	58.66	73.95	595	233	7	2	590	3	590	0	682	baseplate hub subunit tail length determinator [Enterobacteria phage T4T]
ORF102	gi|587757305|gb|AHK11038.1|	58.66	73.78	595	233	7	2	590	3	590	0	679	putative baseplate hub subunit tail length determinator [Escherichia phage HY01]
ORF103	gi|725950000|ref|YP_009100736.1|;gi|678223636|gb|AIM50776.1|;gi|815007310|gb|AKE45087.1|;gi|815008166|gb|AKE45940.1|;gi|815009162|gb|AKE46929.1|	100	100	156	0	0	1	156	22	177	1e-112	322	baseplate hub distal subunit [Shigella phage Shf125875]
ORF103	gi|32453686|ref|NP_861895.1|;gi|682124465|ref|YP_009056777.1|;gi|32350505|gb|AAP76104.1|;gi|604671900|gb|AHV82894.1|	100	100	156	0	0	1	156	1	156	1e-112	321	gp28 baseplate hub distal subunit [Enterobacteria phage RB69]
ORF103	gi|642905807|ref|YP_009037576.1|;gi|642903961|gb|AIA79981.1|	100	100	134	0	0	23	156	1	134	3e-95	276	baseplate hub distal subunit [Escherichia phage vB_EcoM_JS09]
ORF103	gi|291290409|dbj|BAI83204.1|	74.84	87.74	155	39	0	2	156	37	191	5e-87	257	baseplate distal hub subunit [Enterobacteria phage AR1]
ORF103	gi|587757304|gb|AHK11037.1|	74.84	87.74	155	39	0	2	156	23	177	7e-87	256	putative baseplate distal hub subunit [Escherichia phage HY01]
ORF103	gi|228861123|ref|YP_002854146.1|;gi|422934971|ref|YP_007004931.1|;gi|227438797|gb|ACP31109.1|;gi|343177525|gb|AEM00851.1|;gi|815008429|gb|AKE46202.1|	74.84	87.74	155	39	0	2	156	23	177	8e-87	256	gp28 base plate distal hub subunit [Enterobacteria phage RB51]
ORF103	gi|116326411|ref|YP_803131.1|;gi|228861504|ref|YP_002854525.1|;gi|639438841|ref|YP_009030798.1|;gi|713322491|ref|YP_009098575.1|;gi|115344004|gb|ABI95013.1|;gi|227438520|gb|ACP30833.1|;gi|398313738|emb|CCI89085.1|;gi|525334457|gb|AGR46139.1|;gi|628971669|gb|AHY83391.1|;gi|698040594|gb|AIT72925.1|;gi|698040866|gb|AIT73196.1|;gi|698041138|gb|AIT73467.1|;gi|698041410|gb|AIT73738.1|;gi|698041683|gb|A…	74.19	87.1	155	40	0	2	156	23	177	1e-85	253	base plate distal hub subunit [Enterobacteria phage RB32]
ORF103	gi|713322778|ref|YP_009102393.1|;gi|698042230|gb|AIT74555.1|	73.55	87.1	155	41	0	2	156	23	177	2e-85	253	baseplate hub distal subunit [Enterobacteria phage RB27]
ORF103	gi|29366683|ref|NP_049804.2|;gi|33860222|sp|P13336.4|BP28_BPT4;gi|29345252|gb|AAD42436.2|AF158101_23;gi|14859|emb|CAA39973.1|;gi|299780552|gb|ADJ39914.1|;gi|628971842|gb|AHY83563.1|;gi|628972038|gb|AHY83758.1|;gi|628972230|gb|AHY83949.1|;gi|698043053|gb|AIT75375.1|	73.55	87.1	155	41	0	2	156	23	177	2e-85	253	gp28 baseplate hub distal subunit [Enterobacteria phage T4]
ORF103	gi|730984916|ref|YP_009111009.1|;gi|694817629|gb|AIS73511.1|;gi|698043330|gb|AIT75651.1|	74.34	87.5	152	39	0	5	156	1	152	1e-84	249	hypothetical protein pSs1_00201 [Shigella phage pSs-1]
ORF104	gi|642905808|ref|YP_009037577.1|;gi|642903962|gb|AIA79982.1|	99.23	99.23	390	3	0	1	390	1	390	0	805	baseplate hub subunit [Escherichia phage vB_EcoM_JS09]
ORF104	gi|725949999|ref|YP_009100735.1|;gi|678223635|gb|AIM50775.1|	99.23	99.23	390	3	0	1	390	1	390	0	803	baseplate hub subunit [Shigella phage Shf125875]
ORF104	gi|682124464|ref|YP_009056776.1|;gi|604671899|gb|AHV82893.1|;gi|815007311|gb|AKE45088.1|;gi|815008165|gb|AKE45939.1|;gi|815009161|gb|AKE46928.1|	98.97	99.23	390	4	0	1	390	1	390	0	802	baseplate hub subunit [Escherichia phage vB_EcoM_PhAPEC2]
ORF104	gi|32453685|ref|NP_861894.1|;gi|32350504|gb|AAP76103.1|	98.46	99.23	390	6	0	1	390	1	390	0	801	baseplate hub subunit [Enterobacteria phage RB69]
ORF104	gi|422934605|ref|YP_007004566.1|;gi|339791388|gb|AEK12445.1|	75.77	88.66	388	94	0	1	388	1	388	0	643	phage baseplate hub [Enterobacteria phage ime09]
ORF104	gi|330858708|ref|YP_004415083.1|;gi|327397642|gb|AEA73144.1|	75.77	88.92	388	94	0	1	388	1	388	0	643	putative baseplate hub subunit [Shigella phage Shfl2]
ORF104	gi|587757303|gb|AHK11036.1|	75.52	88.66	388	95	0	1	388	1	388	0	642	baseplate hub subunit [Escherichia phage HY01]
ORF104	gi|730984915|ref|YP_009111008.1|;gi|694817628|gb|AIS73510.1|	75.52	88.66	388	95	0	1	388	1	388	0	642	hypothetical protein pSs1_00200 [Shigella phage pSs-1]
ORF104	gi|525334456|gb|AGR46138.1|	75.77	88.66	388	94	0	1	388	1	388	0	642	base plate hub subunit [Yersinia phage PST]
ORF104	gi|9632604|ref|NP_049803.1|;gi|20141829|sp|P17172.4|BP27_BPT4;gi|34809726|pdb|1PDJ|D;gi|34809727|pdb|1PDJ|E;gi|34809728|pdb|1PDJ|F;gi|62738310|pdb|1WTH|D;gi|183448229|pdb|2Z6B|D;gi|5508843|gb|AAD42435.2|AF158101_22;gi|299780551|gb|ADJ39913.1|;gi|628971796|gb|AHY83517.1|;gi|628971998|gb|AHY83718.1|;gi|628972189|gb|AHY83908.1|;gi|698042777|gb|AIT75100.1|;gi|698043052|gb|AIT75374.1|	76.03	88.66	388	93	0	1	388	1	388	0	642	gp27 baseplate hub subunit [Enterobacteria phage T4]
ORF105	gi|642905809|ref|YP_009037578.1|;gi|682124463|ref|YP_009056775.1|;gi|725949998|ref|YP_009100734.1|;gi|604671898|gb|AHV82892.1|;gi|642903963|gb|AIA79983.1|;gi|678223634|gb|AIM50774.1|;gi|815007312|gb|AKE45089.1|;gi|815008164|gb|AKE45938.1|;gi|815009160|gb|AKE46927.1|	100	100	250	0	0	1	250	1	250	0	516	baseplate hub assembly protein [Escherichia phage vB_EcoM_JS09]
ORF105	gi|32453684|ref|NP_861893.1|;gi|32350503|gb|AAP76102.1|	99.6	99.6	251	0	1	1	250	1	251	0	511	baseplate hub assembly protein [Enterobacteria phage RB69]
ORF105	gi|330858707|ref|YP_004415082.1|;gi|327397641|gb|AEA73143.1|	73.09	86.75	249	67	0	1	249	1	249	8e-140	398	putative baseplate hub assembly catalyst [Shigella phage Shfl2]
ORF105	gi|712915025|ref|YP_009102662.1|;gi|397134206|gb|AFO10713.1|	73.09	86.35	249	67	0	1	249	1	249	1e-139	397	baseplate protein [Escherichia phage ECML-134]
ORF105	gi|116326409|ref|YP_803129.1|;gi|115344002|gb|ABI95011.1|;gi|698042502|gb|AIT74826.1|	72.69	86.35	249	68	0	1	249	1	249	3e-139	396	base plate hub assembly catalyst [Enterobacteria phage RB32]
ORF105	gi|228861502|ref|YP_002854523.1|;gi|713322489|ref|YP_009098573.1|;gi|713322776|ref|YP_009102391.1|;gi|227438518|gb|ACP30831.1|;gi|525334455|gb|AGR46137.1|;gi|698040592|gb|AIT72923.1|;gi|698040864|gb|AIT73194.1|;gi|698041136|gb|AIT73465.1|;gi|698041408|gb|AIT73736.1|;gi|698041681|gb|AIT74008.1|;gi|698041955|gb|AIT74281.1|;gi|698042228|gb|AIT74553.1|	72.29	86.35	249	69	0	1	249	1	249	9e-139	395	gp51 base plate hub assembly catalyst [Enterobacteria phage RB14]
ORF105	gi|414086555|ref|YP_006986744.1|;gi|383396336|gb|AFH20152.1|	72.47	87.04	247	68	0	1	247	1	247	1e-138	395	baseplate hub assembly protein [Enterobacteria phage vB_EcoM_ACG-C40]
ORF105	gi|14879|emb|CAA38925.1|;gi|299780550|gb|ADJ39912.1|;gi|698042776|gb|AIT75099.1|;gi|698043051|gb|AIT75373.1|	72.29	86.35	249	69	0	1	249	1	249	1e-138	395	51 [Enterobacteria phage T4]
ORF105	gi|422934604|ref|YP_007004565.1|;gi|339791387|gb|AEK12444.1|	72.69	86.35	249	68	0	1	249	1	249	1e-138	395	phage baseplate protein [Enterobacteria phage ime09]
ORF105	gi|422934969|ref|YP_007004929.1|;gi|291290407|dbj|BAI83202.1|;gi|343177523|gb|AEM00849.1|;gi|815008427|gb|AKE46200.1|	72.47	87.45	247	68	0	1	247	1	247	1e-138	395	baseplate hub assembly catalyst [Escherichia phage wV7]
ORF106	gi|32453683|ref|NP_861892.1|;gi|682124462|ref|YP_009056774.1|;gi|725949997|ref|YP_009100733.1|;gi|19577305|emb|CAD28136.1|;gi|32350502|gb|AAP76101.1|;gi|224922597|emb|CAX52776.1|;gi|604671897|gb|AHV82891.1|;gi|678223633|gb|AIM50773.1|;gi|815007313|gb|AKE45090.1|;gi|815008163|gb|AKE45937.1|;gi|815009159|gb|AKE46926.1|	100	100	208	0	0	1	208	1	208	2e-155	434	gp26 baseplate hub subunit [Enterobacteria phage RB69]
ORF106	gi|642906036|ref|YP_009037579.1|;gi|642904190|gb|AIA80210.1|	99.04	100	208	2	0	1	208	1	208	2e-154	431	baseplate hub subunit [Escherichia phage vB_EcoM_JS09]
ORF106	gi|224922595|emb|CAX52775.1|	62.5	78.37	208	78	0	1	208	1	208	2e-99	291	base plate protein gp26 [Enterobacteria phage Pol]
ORF106	gi|414086554|ref|YP_006986743.1|;gi|383396335|gb|AFH20151.1|	62.02	78.37	208	79	0	1	208	1	208	3e-99	291	baseplate hub [Enterobacteria phage vB_EcoM_ACG-C40]
ORF106	gi|712915024|ref|YP_009102661.1|;gi|397134205|gb|AFO10712.1|	62.02	78.37	208	79	0	1	208	1	208	7e-99	290	baseplate hub protein [Escherichia phage ECML-134]
ORF106	gi|9632603|ref|NP_049801.1|;gi|116326408|ref|YP_803128.1|;gi|228861501|ref|YP_002854522.1|;gi|713322488|ref|YP_009098572.1|;gi|713322775|ref|YP_009102390.1|;gi|137981|sp|P13335.2|BP26_BPT4;gi|5354227|gb|AAD42434.1|AF158101_21;gi|14788|emb|CAA35676.1|;gi|9663027|emb|CAC01086.1|;gi|9798410|emb|CAC03475.1|;gi|9798413|emb|CAC03477.1|;gi|9798416|emb|CAC03479.1|;gi|9856968|emb|CAC04072.1|;gi|9856971|em…	62.02	78.37	208	79	0	1	208	1	208	9e-99	290	gp26 baseplate hub subunit [Enterobacteria phage T4]
ORF106	gi|224922589|emb|CAX52772.1|	62.02	78.37	208	79	0	1	208	1	208	1e-98	290	base plate protein gp26 [Enterobacteria phage RB23]
ORF106	gi|10185043|emb|CAC08807.1|	61.54	77.88	208	80	0	1	208	1	208	2e-98	289	gp26 [Enterobacteria phage KC69]
ORF106	gi|639438838|ref|YP_009030795.1|;gi|628971666|gb|AHY83388.1|	61.54	78.37	208	80	0	1	208	1	208	2e-98	289	baseplate hub subunit [Escherichia phage e11/2]
ORF106	gi|228861120|ref|YP_002854143.1|;gi|730984913|ref|YP_009111006.1|;gi|10185040|emb|CAC08518.1|;gi|227438794|gb|ACP31106.1|;gi|587757301|gb|AHK11034.1|;gi|694817626|gb|AIS73508.1|;gi|698043327|gb|AIT75648.1|	61.54	77.88	208	80	0	1	208	1	208	3e-98	289	gp26 base plate hub subunit [Enterobacteria phage RB51]
ORF107	gi|32453682|ref|NP_861891.1|;gi|642906037|ref|YP_009037580.1|;gi|682124461|ref|YP_009056773.1|;gi|725949996|ref|YP_009100732.1|;gi|19577306|emb|CAD28137.1|;gi|32350501|gb|AAP76100.1|;gi|604671896|gb|AHV82890.1|;gi|642904191|gb|AIA80211.1|;gi|678223632|gb|AIM50772.1|;gi|815007314|gb|AKE45091.1|;gi|815008162|gb|AKE45936.1|;gi|815009158|gb|AKE46925.1|	99.24	99.24	132	1	0	1	132	1	132	2e-91	265	baseplate wedge subunit [Enterobacteria phage RB69]
ORF107	gi|224922598|emb|CAX52777.1|	98.48	98.48	132	2	0	1	132	1	132	5e-91	264	base plate protein gp25 [Enterobacteria phage TuIa]
ORF107	gi|9798411|emb|CAC03476.1|	89.39	97.73	132	14	0	1	132	1	132	4e-85	249	base plate protein gp25 [Enterobacteria phage RB15]
ORF107	gi|9856972|emb|CAC04071.1|;gi|9864377|emb|CAC04143.1|	88.64	97.73	132	15	0	1	132	1	132	9e-85	248	base plate protein gp25 [Enterobacteria phage K3]
ORF107	gi|116326407|ref|YP_803127.1|;gi|228861500|ref|YP_002854521.1|;gi|713322487|ref|YP_009098571.1|;gi|713322774|ref|YP_009102389.1|;gi|9663028|emb|CAC01087.1|;gi|9798414|emb|CAC03478.1|;gi|9798417|emb|CAC03480.1|;gi|115344000|gb|ABI95009.1|;gi|227438516|gb|ACP30829.1|;gi|525334453|gb|AGR46135.1|;gi|698040590|gb|AIT72921.1|;gi|698040862|gb|AIT73192.1|;gi|698041134|gb|AIT73463.1|;gi|698041406|gb|AIT73…	88.64	97.73	132	15	0	1	132	1	132	9e-85	248	base plate wedge subunit [Enterobacteria phage RB32]
ORF107	gi|9632602|ref|NP_049800.1|;gi|228861119|ref|YP_002854142.1|;gi|414086553|ref|YP_006986742.1|;gi|422934967|ref|YP_007004927.1|;gi|639438837|ref|YP_009030794.1|;gi|137980|sp|P09425.1|BP25_BPT4;gi|5354226|gb|AAD42433.1|AF158101_20;gi|215961|gb|AAA32549.1|;gi|9856969|emb|CAC04073.1|;gi|10185035|emb|CAC08521.1|;gi|10185038|emb|CAC08517.1|;gi|10185041|emb|CAC08519.1|;gi|10185044|emb|CAC08808.1|;gi|227…	87.88	97.73	132	16	0	1	132	1	132	2e-84	248	gp25 baseplate wedge subunit [Enterobacteria phage T4]
ORF107	gi|554793467|pdb|4HRZ|A;gi|554793468|pdb|4HRZ|B	87.88	97.73	132	16	0	1	132	3	134	3e-84	247	Chain A, Phage T4 Sheath Initiation Protein Gp25 [Enterobacteria phage T4]
ORF107	gi|330858705|ref|YP_004415080.1|;gi|422934602|ref|YP_007004563.1|;gi|712915023|ref|YP_009102660.1|;gi|730984912|ref|YP_009111005.1|;gi|327397639|gb|AEA73141.1|;gi|339791385|gb|AEK12442.1|;gi|397134204|gb|AFO10711.1|;gi|398313734|emb|CCI89081.1|;gi|587757300|gb|AHK11033.1|;gi|694817625|gb|AIS73507.1|	87.12	97.73	132	17	0	1	132	1	132	1e-83	245	putative baseplate wedge subunit [Shigella phage Shfl2]
ORF107	gi|15425|emb|CAA28777.1|;gi|1364178|emb|CAA28547.1|	88.19	97.64	127	15	0	6	132	1	127	5e-81	239	unnamed protein product [Enterobacteria phage T4]
ORF107	gi|764446103|ref|WP_044369367.1|;gi|589889933|ref|YP_009005469.1|;gi|583927846|gb|AHI61108.1|	80.15	93.89	131	26	0	1	131	1	131	2e-76	227	base plate wedge subunit [Enterobacter phage PG7]
ORF108	gi|642906038|ref|YP_009037581.1|;gi|642904192|gb|AIA80212.1|	99.27	99.27	137	1	0	1	137	20	156	9e-96	278	recombination, repair and ssDNA binding protein [Escherichia phage vB_EcoM_JS09]
ORF108	gi|32453681|ref|NP_861890.1|;gi|682124460|ref|YP_009056772.1|;gi|725949995|ref|YP_009100731.1|;gi|32350500|gb|AAP76099.1|;gi|604671895|gb|AHV82889.1|;gi|678223631|gb|AIM50771.1|;gi|815007315|gb|AKE45092.1|;gi|815008161|gb|AKE45935.1|;gi|815009157|gb|AKE46924.1|	99.27	99.27	137	1	0	1	137	28	164	3e-95	276	UvsY recombination, repair and ssDNA binding protein [Enterobacteria phage RB69]
ORF108	gi|9998940|ref|NP_049799.2|;gi|713322486|ref|YP_009098570.1|;gi|418170|sp|P04537.3|UVSY_BPT4;gi|9313021|gb|AAD42670.2|AF158101_257;gi|15402|emb|CAA28549.1|;gi|15427|emb|CAA28779.1|;gi|299780546|gb|ADJ39908.1|;gi|628971867|gb|AHY83588.1|;gi|628972061|gb|AHY83781.1|;gi|628972253|gb|AHY83972.1|;gi|698040589|gb|AIT72920.1|;gi|698040861|gb|AIT73191.1|;gi|698041133|gb|AIT73462.1|;gi|698041405|gb|AIT737…	83.21	91.24	137	23	0	1	137	1	137	1e-80	238	UvsY recombination, repair and ssDNA binding protein [Enterobacteria phage T4]
ORF108	gi|422934601|ref|YP_007004562.1|;gi|339791384|gb|AEK12441.1|;gi|398313733|emb|CCI89080.1|	83.21	91.24	137	23	0	1	137	1	137	2e-80	238	recombination, repair and ssDNA-binding protein [Enterobacteria phage ime09]
ORF108	gi|228861118|ref|YP_002854141.1|;gi|422934966|ref|YP_007004926.1|;gi|639438836|ref|YP_009030793.1|;gi|730984911|ref|YP_009111004.1|;gi|227438792|gb|ACP31104.1|;gi|291290404|dbj|BAI83199.1|;gi|343177520|gb|AEM00846.1|;gi|628971664|gb|AHY83386.1|;gi|694817624|gb|AIS73506.1|;gi|698043325|gb|AIT75646.1|;gi|815008424|gb|AKE46197.1|	82.48	91.24	137	24	0	1	137	1	137	4e-80	237	UvsY [Enterobacteria phage RB51]
ORF108	gi|330858704|ref|YP_004415079.1|;gi|327397638|gb|AEA73140.1|;gi|587757299|gb|AHK11032.1|	82.48	91.24	137	24	0	1	137	1	137	5e-80	237	putative ssDNA binding recombination repair protein [Shigella phage Shfl2]
ORF108	gi|215962|gb|AAA32550.1|	82.48	90.51	137	24	0	1	137	1	137	1e-79	236	DNA repair protein [Enterobacteria phage T4]
ORF108	gi|116326406|ref|YP_803126.1|;gi|228861499|ref|YP_002854520.1|;gi|414086552|ref|YP_006986741.1|;gi|712915022|ref|YP_009102659.1|;gi|713322773|ref|YP_009102388.1|;gi|115343999|gb|ABI95008.1|;gi|227438515|gb|ACP30828.1|;gi|383396333|gb|AFH20149.1|;gi|397134203|gb|AFO10710.1|;gi|525334452|gb|AGR46134.1|;gi|698042225|gb|AIT74550.1|;gi|698042499|gb|AIT74823.1|	81.75	91.24	137	25	0	1	137	1	137	2e-79	236	ssDNA binding recombination repair [Enterobacteria phage RB32]
ORF108	gi|456351269|ref|YP_007501221.1|;gi|408387118|gb|AFU64127.1|;gi|448913694|gb|AEO97120.1|	76.64	87.59	137	32	0	1	137	1	137	1e-74	223	recombination, repair and ssDNA binding protein [Salmonella phage S16]
ORF108	gi|506564743|ref|WP_016031076.1|;gi|311993181|ref|YP_004010047.1|;gi|589889932|ref|YP_009005468.1|;gi|284178019|gb|ADB81685.1|;gi|583927845|gb|AHI61107.1|	77.21	86.03	136	31	0	1	136	1	136	1e-71	216	recombination, repair and ssDNA binding protein [Enterobacteria phage CC31]
ORF109	gi|682124459|ref|YP_009056771.1|;gi|725949994|ref|YP_009100730.1|;gi|604671894|gb|AHV82888.1|;gi|678223630|gb|AIM50770.1|	95.95	98.65	74	3	0	1	74	1	74	2e-46	147	hypothetical protein PhAPEC2_179 [Escherichia phage vB_EcoM_PhAPEC2]
ORF109	gi|32453680|ref|NP_861889.1|;gi|32350499|gb|AAP76098.1|	97.22	98.61	72	2	0	1	72	1	72	4e-46	146	UvsY.-1 conserved hypothetical protein [Enterobacteria phage RB69]
ORF109	gi|410492103|ref|YP_006907289.1|;gi|642906039|ref|YP_009037582.1|;gi|407437692|gb|AFU20452.1|;gi|642904193|gb|AIA80213.1|	94.59	98.65	74	4	0	1	74	1	74	6e-46	145	hypothetical protein HX01_0257 [Enterobacteria phage HX01]
ORF109	gi|414086551|ref|YP_006986740.1|;gi|383396332|gb|AFH20148.1|	89.19	97.3	74	8	0	1	74	1	74	1e-43	139	hypothetical protein ACG-C40_0184 [Enterobacteria phage vB_EcoM_ACG-C40]
ORF109	gi|587757298|gb|AHK11031.1|	87.84	97.3	74	9	0	1	74	1	74	2e-43	139	hypothetical protein HY01_0174 [Escherichia phage HY01]
ORF109	gi|9632693|ref|NP_049798.1|;gi|228861498|ref|YP_002854519.1|;gi|418607|sp|P32281.1|Y11B_BPT4;gi|5354317|gb|AAD42524.1|AF158101_111;gi|15403|emb|CAA28550.1|;gi|579173|emb|CAA28780.1|;gi|227438514|gb|ACP30827.1|;gi|299780545|gb|ADJ39907.1|;gi|525334451|gb|AGR46133.1|;gi|628971936|gb|AHY83657.1|;gi|628972125|gb|AHY83845.1|;gi|628972320|gb|AHY84039.1|;gi|698042772|gb|AIT75095.1|;gi|698043047|gb|AIT75…	89.19	97.3	74	8	0	1	74	1	74	3e-43	139	UvsY.-1 conserved hypothetical protein [Enterobacteria phage T4]
ORF109	gi|330858703|ref|YP_004415078.1|;gi|327397637|gb|AEA73139.1|	87.84	97.3	74	9	0	1	74	1	74	4e-43	138	hypothetical protein Shfl2p186 [Shigella phage Shfl2]
ORF109	gi|712915021|ref|YP_009102658.1|;gi|397134202|gb|AFO10709.1|	89.19	95.95	74	8	0	1	74	1	74	6e-43	137	hypothetical protein ECML134_183 [Escherichia phage ECML-134]
ORF109	gi|713322485|ref|YP_009098569.1|;gi|398313732|emb|CCI89079.1|;gi|698040588|gb|AIT72919.1|;gi|698040860|gb|AIT73190.1|;gi|698041132|gb|AIT73461.1|;gi|698041404|gb|AIT73732.1|;gi|698041677|gb|AIT74004.1|;gi|698041951|gb|AIT74277.1|	87.84	97.3	74	9	0	1	74	1	74	7e-43	137	hypothetical protein RB3_183 [Enterobacteria phage RB3]
ORF109	gi|730984910|ref|YP_009111003.1|;gi|694817623|gb|AIS73505.1|	85.14	97.3	74	11	0	1	74	1	74	1e-42	137	hypothetical protein pSs1_00195 [Shigella phage pSs-1]
ORF110	gi|32453679|ref|NP_861888.1|;gi|410492104|ref|YP_006907290.1|;gi|725949993|ref|YP_009100729.1|;gi|32350498|gb|AAP76097.1|;gi|407437693|gb|AFU20453.1|;gi|678223629|gb|AIM50769.1|;gi|815007317|gb|AKE45094.1|;gi|815008159|gb|AKE45933.1|;gi|815009155|gb|AKE46922.1|	100	100	55	0	0	1	55	1	55	5e-34	113	hypothetical protein RB69p198 [Enterobacteria phage RB69]
ORF110	gi|642906040|ref|YP_009037583.1|;gi|642904194|gb|AIA80214.1|	98.18	100	55	1	0	1	55	1	55	9e-34	113	hypothetical protein JS09_0260 [Escherichia phage vB_EcoM_JS09]
ORF110	gi|9632694|ref|NP_049797.1|;gi|116326404|ref|YP_803124.1|;gi|228861116|ref|YP_002854139.1|;gi|228861497|ref|YP_002854518.1|;gi|330858702|ref|YP_004415077.1|;gi|414086550|ref|YP_006986739.1|;gi|422934599|ref|YP_007004560.1|;gi|422934964|ref|YP_007004924.1|;gi|639438833|ref|YP_009030790.1|;gi|712915020|ref|YP_009102657.1|;gi|713322484|ref|YP_009098568.1|;gi|713322771|ref|YP_009102386.1|;gi|73098490…	92.73	98.18	55	4	0	1	55	1	55	5e-32	108	UvsY.-2 conserved hypothetical protein [Enterobacteria phage T4]
ORF110	gi|729030217|gb|AIZ01972.1|	85.45	96.36	55	8	0	1	55	1	55	5e-30	103	hypothetical protein VR5_185 [Enterobacteria phage vB_EcoM_VR5]
ORF110	gi|299779133|ref|YP_003734327.1|;gi|298105862|gb|ADI55506.1|	85.45	96.36	55	8	0	1	55	2	56	6e-30	103	uvsY.-2 gene product [Enterobacteria phage IME08]
ORF110	gi|422934223|ref|YP_007004259.1|;gi|345450732|gb|AEN93935.1|	85.45	94.55	55	8	0	1	55	1	55	3e-29	101	conserved hypothetical protein [Enterobacteria phage Bp7]
ORF110	gi|161622616|ref|YP_001595311.1|;gi|238695338|ref|YP_002922531.1|;gi|52139940|gb|AAU29310.1|;gi|220029474|gb|ACL78408.1|	83.64	94.55	55	9	0	1	55	1	55	5e-29	100	UvsY.2 [Enterobacteria phage JS98]
ORF110	gi|308814548|ref|YP_003934822.1|;gi|308206140|gb|ADO19539.1|;gi|729030501|gb|AIZ02255.1|	83.64	94.55	55	9	0	1	55	1	55	6e-29	100	UvsY.2 [Shigella phage SP18]
ORF110	gi|314121764|ref|YP_004063883.1|;gi|313151521|gb|ADR32577.1|;gi|729030793|gb|AIZ02546.1|;gi|729031084|gb|AIZ02836.1|	81.82	94.55	55	10	0	1	55	1	55	2e-28	99.8	UvsY.-2 conserved hypothetical protein [Enterobacteria phage vB_EcoM-VR7]
ORF110	gi|311993180|ref|YP_004010046.1|;gi|589889931|ref|YP_009005467.1|;gi|284178018|gb|ADB81684.1|;gi|583927844|gb|AHI61106.1|	81.82	89.09	55	10	0	1	55	1	55	2e-27	97.1	hypothetical protein CC31p188 [Enterobacteria phage CC31]
ORF111	gi|32453678|ref|NP_861887.1|;gi|32350497|gb|AAP76096.1|	98.68	98.68	76	1	0	1	76	1	76	9e-47	147	hypothetical protein RB69p197 [Enterobacteria phage RB69]
ORF111	gi|410492105|ref|YP_006907291.1|;gi|642905810|ref|YP_009037584.1|;gi|407437694|gb|AFU20454.1|;gi|642903964|gb|AIA79984.1|	97.4	97.4	77	1	1	1	76	1	77	2e-44	141	hypothetical protein HX01_0259 [Enterobacteria phage HX01]
ORF111	gi|682124458|ref|YP_009056770.1|;gi|604671893|gb|AHV82887.1|	96.1	97.4	77	2	1	1	76	1	77	6e-44	140	hypothetical protein PhAPEC2_178 [Escherichia phage vB_EcoM_PhAPEC2]
ORF111	gi|639438832|ref|YP_009030789.1|;gi|628971660|gb|AHY83382.1|	89.47	94.74	76	8	0	1	76	5	80	8e-42	135	RNA-DNA and DNA-DNA helicase ATPase [Escherichia phage e11/2]
ORF111	gi|116326403|ref|YP_803123.1|;gi|228861496|ref|YP_002854517.1|;gi|330858701|ref|YP_004415076.1|;gi|414086549|ref|YP_006986738.1|;gi|422934598|ref|YP_007004559.1|;gi|712915019|ref|YP_009102656.1|;gi|713322483|ref|YP_009098567.1|;gi|713322770|ref|YP_009102385.1|;gi|115343996|gb|ABI95005.1|;gi|227438512|gb|ACP30825.1|;gi|299780543|gb|ADJ39905.1|;gi|327397635|gb|AEA73137.1|;gi|339791381|gb|AEK12438.1…	89.47	94.74	76	8	0	1	76	1	76	1e-41	134	hypothetical protein RB32ORF181w [Enterobacteria phage RB32]
ORF111	gi|159164719|pdb|2JPN|A	89.47	94.74	76	8	0	1	76	4	79	1e-41	134	Chain A, Solution Structure Of T4 Bacteriophage Helicase Uvsw.1 [Enterobacteria phage T4]
ORF111	gi|228861115|ref|YP_002854138.1|;gi|730984908|ref|YP_009111001.1|;gi|227438789|gb|ACP31101.1|;gi|525334449|gb|AGR46131.1|;gi|694817621|gb|AIS73503.1|;gi|698043322|gb|AIT75643.1|	88.16	94.74	76	9	0	1	76	1	76	2e-41	134	uvsW.1 conserved hypothetical protein [Enterobacteria phage RB51]
ORF111	gi|9632837|ref|NP_049796.1|;gi|731087|sp|P20703.2|UVSW_BPT4;gi|5354461|gb|AAD42668.1|AF158101_255	89.47	94.74	76	8	0	1	76	512	587	1e-38	136	UvsW RNA-DNA and DNA-DNA helicase, ATPase [Enterobacteria phage T4]
ORF111	gi|422934963|ref|YP_007004923.1|;gi|291290401|dbj|BAI83196.1|;gi|343177517|gb|AEM00843.1|;gi|815008421|gb|AKE46194.1|	93.85	98.46	65	4	0	1	65	1	65	2e-37	124	hypothetical protein [Escherichia phage wV7]
ORF111	gi|764446105|ref|WP_044369368.1|;gi|589889930|ref|YP_009005466.1|;gi|583927843|gb|AHI61105.1|	71.23	82.19	73	20	1	5	76	7	79	5e-29	102	putative split helicase [Enterobacter phage PG7]
ORF112	gi|32453677|ref|NP_861886.1|;gi|32350496|gb|AAP76095.1|	99.4	100	504	3	0	1	504	1	504	0	1041	UvsW helicase [Enterobacteria phage RB69]
ORF112	gi|642905811|ref|YP_009037585.1|;gi|642903965|gb|AIA79985.1|	99.01	99.6	504	5	0	1	504	1	504	0	1038	helicase [Escherichia phage vB_EcoM_JS09]
ORF112	gi|725949992|ref|YP_009100728.1|;gi|678223628|gb|AIM50768.1|	98.61	99.4	504	7	0	1	504	1	504	0	1034	RNA-DNA helicase [Shigella phage Shf125875]
ORF112	gi|682124457|ref|YP_009056769.1|;gi|604671892|gb|AHV82886.1|	98.61	99.4	504	7	0	1	504	1	504	0	1034	helicase [Escherichia phage vB_EcoM_PhAPEC2]
ORF112	gi|116326402|ref|YP_803122.1|;gi|115343995|gb|ABI95004.1|;gi|698042495|gb|AIT74819.1|	87.5	94.44	504	62	1	1	504	1	503	0	938	RNA-DNA and DNA-DNA helicase [Enterobacteria phage RB32]
ORF112	gi|422934597|ref|YP_007004558.1|;gi|339791380|gb|AEK12437.1|;gi|587757295|gb|AHK11028.1|	87.5	94.44	504	62	1	1	504	1	503	0	938	phage-associated DNA helicase [Enterobacteria phage ime09]
ORF112	gi|228861114|ref|YP_002854137.1|;gi|422934962|ref|YP_007004922.1|;gi|639438831|ref|YP_009030788.1|;gi|730984907|ref|YP_009111000.1|;gi|227438788|gb|ACP31100.1|;gi|343177516|gb|AEM00842.1|;gi|398313729|emb|CCI89076.1|;gi|628971659|gb|AHY83381.1|;gi|694817620|gb|AIS73502.1|;gi|698043321|gb|AIT75642.1|;gi|815008420|gb|AKE46193.1|	87.3	94.44	504	63	1	1	504	1	503	0	937	RNA-DNA and DNA-DNA helicase [Enterobacteria phage RB51]
ORF112	gi|713322769|ref|YP_009102384.1|;gi|698042221|gb|AIT74546.1|	87.1	94.44	504	64	1	1	504	1	503	0	936	RNA-DNA and DNA-DNA helicase ATPase [Enterobacteria phage RB27]
ORF112	gi|9632837|ref|NP_049796.1|;gi|731087|sp|P20703.2|UVSW_BPT4;gi|5354461|gb|AAD42668.1|AF158101_255	86.85	94.42	502	65	1	3	504	2	502	0	932	UvsW RNA-DNA and DNA-DNA helicase, ATPase [Enterobacteria phage T4]
ORF112	gi|299780542|gb|ADJ39904.1|;gi|698042769|gb|AIT75092.1|;gi|698043044|gb|AIT75366.1|	87.05	94.62	502	64	1	3	504	2	502	0	932	helicase [Enterobacteria phage T4T]
ORF113	gi|682124456|ref|YP_009056768.1|;gi|604671891|gb|AHV82885.1|	99.1	99.1	222	2	0	1	222	1	222	2e-158	442	inhibitor of prohead protease [Escherichia phage vB_EcoM_PhAPEC2]
ORF113	gi|642906041|ref|YP_009037586.1|;gi|642904195|gb|AIA80215.1|	98.2	99.1	222	4	0	1	222	1	222	4e-157	439	inhibitor of prohead protease [Escherichia phage vB_EcoM_JS09]
ORF113	gi|32453676|ref|NP_861885.1|;gi|32350495|gb|AAP76094.1|	97.75	98.2	222	5	0	1	222	1	222	1e-155	436	Inh inhibitor of prohead protease gp21 [Enterobacteria phage RB69]
ORF113	gi|725949991|ref|YP_009100727.1|;gi|678223627|gb|AIM50767.1|	96.4	97.3	222	8	0	1	222	1	222	3e-152	427	inhibitor of prohead protease [Shigella phage Shf125875]
ORF113	gi|422934961|ref|YP_007004921.1|;gi|343177515|gb|AEM00841.1|;gi|815008419|gb|AKE46192.1|	67.09	75.21	234	57	3	1	222	1	226	2e-102	300	inhibitor of prohead protease gp21 [Escherichia phage wV7]
ORF113	gi|587757294|gb|AHK11027.1|	66.67	75.21	234	58	3	1	222	1	226	3e-102	300	putative prohead protease inhibitor [Escherichia phage HY01]
ORF113	gi|639438830|ref|YP_009030787.1|;gi|628971658|gb|AHY83380.1|	67.52	74.79	234	56	3	1	222	1	226	3e-102	300	inhibitor of prohead protease [Escherichia phage e11/2]
ORF113	gi|713322480|ref|YP_009098564.1|;gi|698040583|gb|AIT72914.1|;gi|698040855|gb|AIT73185.1|;gi|698041127|gb|AIT73456.1|;gi|698041399|gb|AIT73727.1|;gi|698041672|gb|AIT73999.1|;gi|698041946|gb|AIT74272.1|	67.09	74.79	234	57	3	1	222	1	226	6e-102	299	minor capsid protein inhibitor of prohead protease [Enterobacteria phage RB3]
ORF113	gi|228861113|ref|YP_002854136.1|;gi|227438787|gb|ACP31099.1|;gi|698043320|gb|AIT75641.1|	67.09	74.79	234	57	3	1	222	1	226	9e-102	299	minor capsid protein inhibitor of 21 protease [Enterobacteria phage RB51]
ORF113	gi|414086545|ref|YP_006986734.1|;gi|383396326|gb|AFH20142.1|	66.67	74.79	234	58	3	1	222	1	226	1e-101	298	inhibitor of prohead protease [Enterobacteria phage vB_EcoM_ACG-C40]
ORF114	gi|713322479|ref|YP_009098563.1|;gi|698040582|gb|AIT72913.1|;gi|698040854|gb|AIT73184.1|;gi|698041126|gb|AIT73455.1|;gi|698041398|gb|AIT73726.1|;gi|698041671|gb|AIT73998.1|;gi|698041945|gb|AIT74271.1|	94.95	97.34	376	19	0	1	376	1	376	0	724	large head outer capsid protein [Enterobacteria phage RB3]
ORF114	gi|682124455|ref|YP_009056767.1|;gi|604671890|gb|AHV82884.1|	95.48	97.07	376	17	0	1	376	1	376	0	704	head outer capsid protein [Escherichia phage vB_EcoM_PhAPEC2]
ORF114	gi|642906042|ref|YP_009037587.1|;gi|642904196|gb|AIA80216.1|	93.62	96.01	376	24	0	1	376	1	376	0	696	large head outer capsid protein [Escherichia phage vB_EcoM_JS09]
ORF114	gi|116326400|ref|YP_803120.1|;gi|115343993|gb|ABI95002.1|;gi|698042493|gb|AIT74817.1|	90.69	96.01	376	35	0	1	376	1	376	0	695	large head outer capsid protein [Enterobacteria phage RB32]
ORF114	gi|228861112|ref|YP_002854135.1|;gi|227438786|gb|ACP31098.1|;gi|698043319|gb|AIT75640.1|	92.55	96.28	376	28	0	1	376	1	376	0	690	large head outer capsid protein [Enterobacteria phage RB51]
ORF114	gi|725949990|ref|YP_009100726.1|;gi|678223626|gb|AIM50766.1|	91.76	96.28	376	31	0	1	376	1	376	0	683	capsid decoration protein [Shigella phage Shf125875]
ORF114	gi|330858697|ref|YP_004415072.1|;gi|327397631|gb|AEA73133.1|	92.29	95.48	376	29	0	1	376	1	376	0	676	putative large head outer capsid protein [Shigella phage Shfl2]
ORF114	gi|639438829|ref|YP_009030786.1|;gi|628971657|gb|AHY83379.1|	90.96	95.21	376	34	0	1	376	1	376	0	674	head outer capsid protein [Escherichia phage e11/2]
ORF114	gi|587757293|gb|AHK11026.1|	90.69	95.21	376	35	0	1	376	1	376	0	667	putative head outer capsid protein, Hoc [Escherichia phage HY01]
ORF114	gi|9632750|ref|NP_049793.1|;gi|123450|sp|P18056.1|HOC_BPT4;gi|5354374|gb|AAD42581.1|AF158101_168;gi|14790|emb|CAA33010.1|;gi|628971797|gb|AHY83518.1|;gi|628971999|gb|AHY83719.1|;gi|628972190|gb|AHY83909.1|;gi|698042766|gb|AIT75089.1|;gi|698043041|gb|AIT75363.1|	89.89	93.35	376	38	0	1	376	1	376	0	664	Hoc head outer capsid protein [Enterobacteria phage T4]
ORF115	gi|32453674|ref|NP_861883.1|;gi|642906043|ref|YP_009037588.1|;gi|682124454|ref|YP_009056766.1|;gi|725949989|ref|YP_009100725.1|;gi|32350493|gb|AAP76092.1|;gi|604671889|gb|AHV82883.1|;gi|642904197|gb|AIA80217.1|;gi|678223625|gb|AIM50765.1|;gi|815007322|gb|AKE45099.1|;gi|815008154|gb|AKE45928.1|;gi|815009150|gb|AKE46917.1|	96.72	98.36	61	2	0	1	61	1	61	4e-36	119	gp24.3 conserved hypothetical protein [Enterobacteria phage RB69]
ORF115	gi|410492106|ref|YP_006907292.1|;gi|407437695|gb|AFU20455.1|	95.08	96.72	61	3	0	1	61	1	61	1e-35	118	hypothetical protein HX01_0263 [Enterobacteria phage HX01]
ORF115	gi|116326399|ref|YP_803119.1|;gi|639438828|ref|YP_009030785.1|;gi|115343992|gb|ABI95001.1|;gi|291290395|dbj|BAI83190.1|;gi|628971656|gb|AHY83378.1|	60.66	81.97	61	24	0	1	61	5	65	2e-20	79.7	hypothetical protein RB32ORF177c [Enterobacteria phage RB32]
ORF115	gi|228861111|ref|YP_002854134.1|;gi|228861491|ref|YP_002854512.1|;gi|330858696|ref|YP_004415071.1|;gi|422934594|ref|YP_007004555.1|;gi|422934959|ref|YP_007004919.1|;gi|712915013|ref|YP_009102650.1|;gi|713322766|ref|YP_009102381.1|;gi|227438507|gb|ACP30820.1|;gi|227438785|gb|ACP31097.1|;gi|299780538|gb|ADJ39900.1|;gi|327397630|gb|AEA73132.1|;gi|339791377|gb|AEK12434.1|;gi|343177513|gb|AEM00839.1|;…	60.66	81.97	61	24	0	1	61	1	61	2e-20	79.7	gp24.3 hypothetical protein [Enterobacteria phage RB51]
ORF115	gi|713322478|ref|YP_009098562.1|;gi|698040581|gb|AIT72912.1|;gi|698040853|gb|AIT73183.1|;gi|698041125|gb|AIT73454.1|;gi|698041397|gb|AIT73725.1|;gi|698041670|gb|AIT73997.1|;gi|698041944|gb|AIT74270.1|	59.02	81.97	61	25	0	1	61	1	61	3e-20	79	hypothetical protein RB3_176 [Enterobacteria phage RB3]
ORF115	gi|414086542|ref|YP_006986731.1|;gi|730984904|ref|YP_009110997.1|;gi|383396323|gb|AFH20139.1|;gi|694817617|gb|AIS73499.1|	58.18	83.64	55	23	0	7	61	1	55	2e-17	72	hypothetical protein ACG-C40_0175 [Enterobacteria phage vB_EcoM_ACG-C40]
ORF115	gi|729030210|gb|AIZ01965.1|	55.17	79.31	58	26	0	4	61	7	64	5e-16	68.6	hypothetical protein VR5_178 [Enterobacteria phage vB_EcoM_VR5]
ORF115	gi|238695331|ref|YP_002922524.1|;gi|220029467|gb|ACL78401.1|	54.39	75.44	57	26	0	4	60	3	59	4e-15	65.9	gp24.3 hypothetical protein [Enterobacteria phage JS10]
ORF115	gi|9632601|ref|NP_049792.1|;gi|731232|sp|P39492.1|Y10C_BPT4;gi|5354225|gb|AAD42432.1|AF158101_19	55.74	70.49	61	16	1	1	61	1	50	9e-15	64.7	gp24.3 conserved hypothetical protein [Enterobacteria phage T4]
ORF115	gi|639438501|ref|YP_009030239.1|;gi|625370574|gb|AHY25434.1|	50.94	77.36	53	26	0	5	57	6	58	1e-14	64.7	hypothetical protein PS2_192 [Serratia phage PS2]
ORF116	gi|642906044|ref|YP_009037589.1|;gi|725949988|ref|YP_009100724.1|;gi|642904198|gb|AIA80218.1|;gi|678223624|gb|AIM50764.1|;gi|815007323|gb|AKE45100.1|;gi|815008153|gb|AKE45927.1|;gi|815009149|gb|AKE46916.1|	100	100	83	0	0	1	83	1	83	2e-57	175	hypothetical protein JS09_0266 [Escherichia phage vB_EcoM_JS09]
ORF116	gi|32453673|ref|NP_861882.1|;gi|32350492|gb|AAP76091.1|	98.8	98.8	83	1	0	1	83	1	83	8e-57	174	gp24.2 conserved hypothetical protein [Enterobacteria phage RB69]
ORF116	gi|682124453|ref|YP_009056765.1|;gi|604671888|gb|AHV82882.1|	98.8	98.8	83	1	0	1	83	1	83	9e-57	173	hypothetical protein PhAPEC2_173 [Escherichia phage vB_EcoM_PhAPEC2]
ORF116	gi|116326398|ref|YP_803118.1|;gi|330858695|ref|YP_004415070.1|;gi|422934593|ref|YP_007004554.1|;gi|115343991|gb|ABI95000.1|;gi|327397629|gb|AEA73131.1|;gi|339791376|gb|AEK12433.1|;gi|525334442|gb|AGR46124.1|;gi|587757291|gb|AHK11024.1|;gi|698042491|gb|AIT74815.1|	53.66	71.95	82	38	0	2	83	11	92	2e-26	96.7	hypothetical protein RB32ORF176c [Enterobacteria phage RB32]
ORF116	gi|228861110|ref|YP_002854133.1|;gi|422934958|ref|YP_007004918.1|;gi|713322765|ref|YP_009102380.1|;gi|227438784|gb|ACP31096.1|;gi|291290394|dbj|BAI83189.1|;gi|343177512|gb|AEM00838.1|;gi|398313725|emb|CCI89072.1|;gi|698042217|gb|AIT74542.1|;gi|698043317|gb|AIT75638.1|;gi|815008416|gb|AKE46189.1|	53.66	71.95	82	38	0	2	83	11	92	2e-26	96.3	gp24.2 hypothetical protein [Enterobacteria phage RB51]
ORF116	gi|228861490|ref|YP_002854511.1|;gi|227438506|gb|ACP30819.1|	53.66	71.95	82	38	0	2	83	11	92	3e-26	96.3	gp24.2 hypothetical protein [Enterobacteria phage RB14]
ORF116	gi|414086541|ref|YP_006986730.1|;gi|383396322|gb|AFH20138.1|	53.66	70.73	82	38	0	2	83	11	92	4e-26	95.9	hypothetical protein ACG-C40_0174 [Enterobacteria phage vB_EcoM_ACG-C40]
ORF116	gi|9632600|ref|NP_049791.1|;gi|639438827|ref|YP_009030784.1|;gi|418319|sp|P32278.1|Y10B_BPT4;gi|5354224|gb|AAD42431.1|AF158101_18;gi|15259|emb|CAA49219.1|;gi|299780537|gb|ADJ39899.1|;gi|628971655|gb|AHY83377.1|;gi|628971910|gb|AHY83631.1|;gi|628972100|gb|AHY83820.1|;gi|628972295|gb|AHY84014.1|;gi|698042764|gb|AIT75087.1|;gi|698043039|gb|AIT75361.1|	53.66	69.51	82	38	0	2	83	11	92	8e-26	95.1	gp24.2 conserved hypothetical protein [Enterobacteria phage T4]
ORF116	gi|712915012|ref|YP_009102649.1|;gi|397134193|gb|AFO10700.1|	52.44	69.51	82	39	0	2	83	11	92	9e-26	94.7	hypothetical protein ECML134_174 [Escherichia phage ECML-134]
ORF116	gi|713322477|ref|YP_009098561.1|;gi|698040580|gb|AIT72911.1|;gi|698040852|gb|AIT73182.1|;gi|698041124|gb|AIT73453.1|;gi|698041396|gb|AIT73724.1|;gi|698041669|gb|AIT73996.1|;gi|698041943|gb|AIT74269.1|	52.44	68.29	82	39	0	2	83	11	92	3e-25	93.6	hypothetical protein RB3_175 [Enterobacteria phage RB3]
ORF117	gi|682124452|ref|YP_009056764.1|;gi|604671887|gb|AHV82881.1|	97.59	98.8	332	8	0	1	332	1	332	0	671	RNA ligase [Escherichia phage vB_EcoM_PhAPEC2]
ORF117	gi|32453672|ref|NP_861881.1|;gi|32350491|gb|AAP76090.1|	96.69	98.49	332	11	0	1	332	1	332	0	666	RnlB RNA ligase 2 [Enterobacteria phage RB69]
ORF117	gi|725949987|ref|YP_009100723.1|;gi|678223623|gb|AIM50763.1|	94.33	95.82	335	16	1	1	332	1	335	0	649	RNA ligase 2 [Shigella phage Shf125875]
ORF117	gi|116326397|ref|YP_803117.1|;gi|115343990|gb|ABI94999.1|;gi|698042490|gb|AIT74814.1|	76.05	85.03	334	78	2	1	332	1	334	0	525	RNA ligase [Enterobacteria phage RB32]
ORF117	gi|330858694|ref|YP_004415069.1|;gi|327397628|gb|AEA73130.1|;gi|587757290|gb|AHK11023.1|	75.75	85.03	334	79	2	1	332	1	334	0	524	putative RNA ligase [Shigella phage Shfl2]
ORF117	gi|228861489|ref|YP_002854510.1|;gi|227438505|gb|ACP30818.1|	75.75	85.33	334	79	2	1	332	1	334	0	524	RNA ligase [Enterobacteria phage RB14]
ORF117	gi|398313724|emb|CCI89071.1|	75.15	85.93	334	81	2	1	332	1	334	0	523	protein of unknown function [Yersinia phage phiD1]
ORF117	gi|712915011|ref|YP_009102648.1|;gi|397134192|gb|AFO10699.1|	75.45	85.33	334	80	2	1	332	1	334	0	523	hypothetical protein ECML134_173 [Escherichia phage ECML-134]
ORF117	gi|422934957|ref|YP_007004917.1|;gi|291290393|dbj|BAI83188.1|;gi|343177511|gb|AEM00837.1|;gi|815008415|gb|AKE46188.1|	75.75	85.03	334	79	2	1	332	1	334	0	523	RNA ligase 2 [Escherichia phage wV7]
ORF117	gi|525334441|gb|AGR46123.1|	75.75	85.03	334	79	2	1	332	1	334	0	523	RNA ligase 2 [Yersinia phage PST]
ORF118	gi|682124451|ref|YP_009056763.1|;gi|604671886|gb|AHV82880.1|	100	100	427	0	0	1	427	1	427	0	875	head vertex protein [Escherichia phage vB_EcoM_PhAPEC2]
ORF118	gi|642905812|ref|YP_009037592.1|;gi|642903966|gb|AIA79986.1|;gi|815007325|gb|AKE45102.1|;gi|815008151|gb|AKE45925.1|;gi|815009147|gb|AKE46914.1|	99.77	99.77	427	1	0	1	427	1	427	0	872	capsid vertex protein [Escherichia phage vB_EcoM_JS09]
ORF118	gi|725949986|ref|YP_009100722.1|;gi|678223622|gb|AIM50762.1|	98.83	99.53	427	5	0	1	427	1	427	0	867	head vertex protein [Shigella phage Shf125875]
ORF118	gi|32453671|ref|NP_861880.1|;gi|32350490|gb|AAP76089.1|	98.83	99.3	427	5	0	1	427	1	427	0	867	capsid vertex protein [Enterobacteria phage RB69]
ORF118	gi|713322763|ref|YP_009102378.1|;gi|698042215|gb|AIT74540.1|	95.55	98.59	427	19	0	1	427	1	427	0	821	precursor of head vertex subunit [Enterobacteria phage RB27]
ORF118	gi|730984901|ref|YP_009110994.1|;gi|694817614|gb|AIS73496.1|	95.55	98.59	427	19	0	1	427	1	427	0	821	hypothetical protein pSs1_00186 [Shigella phage pSs-1]
ORF118	gi|422934591|ref|YP_007004552.1|;gi|339791374|gb|AEK12431.1|	95.32	98.59	427	20	0	1	427	1	427	0	821	phage capsid vertex [Enterobacteria phage ime09]
ORF118	gi|330858693|ref|YP_004415068.1|;gi|327397627|gb|AEA73129.1|	95.55	98.59	427	19	0	1	427	1	427	0	821	putative head vertex subunit precursor [Shigella phage Shfl2]
ORF118	gi|713322475|ref|YP_009098559.1|;gi|698040578|gb|AIT72909.1|;gi|698040850|gb|AIT73180.1|;gi|698041122|gb|AIT73451.1|;gi|698041394|gb|AIT73722.1|;gi|698041667|gb|AIT73994.1|;gi|698041941|gb|AIT74267.1|	95.55	98.36	427	19	0	1	427	1	427	0	820	precursor of head vertex subunit [Enterobacteria phage RB3]
ORF118	gi|525334440|gb|AGR46122.1|	95.55	98.59	427	19	0	1	427	1	427	0	820	head vertex protein [Yersinia phage PST]
ORF119	gi|682124450|ref|YP_009056762.1|;gi|725949985|ref|YP_009100721.1|;gi|604671885|gb|AHV82879.1|;gi|678223621|gb|AIM50761.1|	100	100	89	0	0	1	89	1	89	5e-60	182	hypothetical protein PhAPEC2_170 [Escherichia phage vB_EcoM_PhAPEC2]
ORF119	gi|642906047|ref|YP_009037593.1|;gi|642904201|gb|AIA80221.1|	98.88	98.88	89	1	0	1	89	1	89	2e-58	178	hypothetical protein JS09_0270 [Escherichia phage vB_EcoM_JS09]
ORF119	gi|32453669|ref|NP_861878.1|;gi|32350488|gb|AAP76087.1|	93.94	96.97	33	2	0	39	71	1	33	1e-15	67.8	RB69ORF188c hypothetical protein [Enterobacteria phage RB69]
ORF119	gi|729030491|gb|AIZ02245.1|	37.93	57.47	87	53	1	1	86	1	87	7e-11	56.2	hypothetical protein VR20_187 [Enterobacteria phage vB_EcoM_VR20]
ORF119	gi|314121752|ref|YP_004063871.1|;gi|313151509|gb|ADR32565.1|;gi|729030781|gb|AIZ02534.1|	37.93	57.47	87	53	1	1	86	1	87	1e-10	55.8	hypothetical protein VR7_gp190 [Enterobacteria phage vB_EcoM-VR7]
ORF119	gi|729031072|gb|AIZ02824.1|	36.78	57.47	87	54	1	1	86	1	87	2e-10	55.1	hypothetical protein VR26_187 [Enterobacteria phage vB_EcoM_VR26]
ORF119	gi|308814538|ref|YP_003934812.1|;gi|308206130|gb|ADO19529.1|	36.78	58.62	87	54	1	1	86	1	87	4e-10	54.3	hypothetical protein SP18_gp189 [Shigella phage SP18]
ORF119	gi|161622608|ref|YP_001595302.1|;gi|160331901|gb|AAU29301.2|	34.09	57.95	88	57	1	1	87	1	88	4e-09	51.2	hypothetical protein EpJS98_gp173 [Enterobacteria phage JS98]
ORF119	gi|422934234|ref|YP_007004270.1|;gi|345450743|gb|AEN93946.1|	32.95	56.82	88	58	1	1	87	6	93	3e-08	48.9	hypothetical protein EpBp7_0229 [Enterobacteria phage Bp7]
ORF119	gi|299779122|ref|YP_003734316.1|;gi|298105851|gb|ADI55495.1|	32.95	56.82	88	58	1	1	87	6	93	3e-08	48.5	unnamed protein product [Enterobacteria phage IME08]
ORF120	gi|642905813|ref|YP_009037594.1|;gi|725949984|ref|YP_009100720.1|;gi|642903967|gb|AIA79987.1|;gi|678223620|gb|AIM50760.1|	99.62	99.81	522	2	0	1	522	1	522	0	1062	major capsid protein [Escherichia phage vB_EcoM_JS09]
ORF120	gi|682124449|ref|YP_009056761.1|;gi|604671884|gb|AHV82878.1|	99.62	99.62	522	2	0	1	522	1	522	0	1061	major capsid protein [Escherichia phage vB_EcoM_PhAPEC2]
ORF120	gi|32453668|ref|NP_861877.1|;gi|32350487|gb|AAP76086.1|	97.32	97.89	522	14	0	1	522	1	522	0	1035	major capsid protein [Enterobacteria phage RB69]
ORF120	gi|713322474|ref|YP_009098558.1|;gi|698040577|gb|AIT72908.1|;gi|698040849|gb|AIT73179.1|;gi|698041121|gb|AIT73450.1|;gi|698041393|gb|AIT73721.1|;gi|698041666|gb|AIT73993.1|;gi|698041940|gb|AIT74266.1|	95.19	97.88	520	25	0	3	522	2	521	0	1023	major capsid protein [Enterobacteria phage RB3]
ORF120	gi|215872|gb|AAA32503.1|;gi|299780533|gb|ADJ39895.1|;gi|698042760|gb|AIT75083.1|;gi|698043035|gb|AIT75357.1|	95	97.69	520	26	0	3	522	2	521	0	1021	major capsid protein (g23) [Enterobacteria phage T4]
ORF120	gi|712915008|ref|YP_009102645.1|;gi|397134189|gb|AFO10696.1|	95	97.69	520	26	0	3	522	2	521	0	1020	major capsid protein [Escherichia phage ECML-134]
ORF120	gi|9632597|ref|NP_049787.1|;gi|20141172|sp|P04535.2|CAPSH_BPT4;gi|5354221|gb|AAD42428.1|AF158101_15;gi|15302|emb|CAA25911.1|	94.81	97.69	520	27	0	3	522	2	521	0	1019	gp23 major head protein [Enterobacteria phage T4]
ORF120	gi|525334438|gb|AGR46120.1|	94.62	97.5	520	28	0	3	522	2	521	0	1018	major head protein [Yersinia phage PST]
ORF120	gi|587757288|gb|AHK11021.1|	94.81	97.69	520	27	0	3	522	2	521	0	1018	putative major capsid protein [Escherichia phage HY01]
ORF120	gi|639438824|ref|YP_009030781.1|;gi|628971652|gb|AHY83374.1|	94.81	97.31	520	27	0	3	522	2	521	0	1018	major capsid protein [Escherichia phage e11/2]
ORF121	gi|642905814|ref|YP_009037595.1|;gi|725949982|ref|YP_009100719.1|;gi|642903968|gb|AIA79988.1|;gi|678223618|gb|AIM50758.1|;gi|815007328|gb|AKE45105.1|;gi|815008148|gb|AKE45922.1|;gi|815009144|gb|AKE46911.1|	100	100	270	0	0	1	270	1	270	0	529	prohead core protein [Escherichia phage vB_EcoM_JS09]
ORF121	gi|682124448|ref|YP_009056760.1|;gi|604671883|gb|AHV82877.1|	99.26	99.63	270	2	0	1	270	1	270	0	526	prohead core scaffold protein [Escherichia phage vB_EcoM_PhAPEC2]
ORF121	gi|32453667|ref|NP_861876.1|;gi|32350486|gb|AAP76085.1|	98.89	99.26	270	3	0	1	270	1	270	0	523	prohead core protein [Enterobacteria phage RB69]
ORF121	gi|414086536|ref|YP_006986725.1|;gi|383396317|gb|AFH20133.1|;gi|398313721|emb|CCI89068.1|	77.78	87.78	270	59	1	1	270	1	269	6e-118	344	prohead core scaffold protein [Enterobacteria phage vB_EcoM_ACG-C40]
ORF121	gi|639438823|ref|YP_009030780.1|;gi|628971651|gb|AHY83373.1|	77.78	87.78	270	59	1	1	270	1	269	7e-118	343	prohead core scaffold protein [Escherichia phage e11/2]
ORF121	gi|228861106|ref|YP_002854129.1|;gi|422934954|ref|YP_007004914.1|;gi|227438780|gb|ACP31092.1|;gi|291290390|dbj|BAI83185.1|;gi|343177508|gb|AEM00834.1|;gi|698043313|gb|AIT75634.1|;gi|815008412|gb|AKE46185.1|	77.41	87.78	270	60	1	1	270	1	269	4e-117	342	gp22 prohead core scaffold protein [Enterobacteria phage RB51]
ORF121	gi|713322473|ref|YP_009098557.1|;gi|713322761|ref|YP_009102376.1|;gi|299780532|gb|ADJ39894.1|;gi|698040576|gb|AIT72907.1|;gi|698040848|gb|AIT73178.1|;gi|698041120|gb|AIT73449.1|;gi|698041392|gb|AIT73720.1|;gi|698041665|gb|AIT73992.1|;gi|698041939|gb|AIT74265.1|;gi|698042213|gb|AIT74538.1|;gi|698042759|gb|AIT75082.1|	77.41	87.41	270	60	1	1	270	1	269	5e-117	342	scaffold prohead core protein [Enterobacteria phage RB3]
ORF121	gi|228861486|ref|YP_002854507.1|;gi|227438502|gb|ACP30815.1|	77.04	87.41	270	61	1	1	270	1	269	2e-116	340	gp22 prohead core scaffold protein [Enterobacteria phage RB14]
ORF121	gi|9632596|ref|NP_049786.1|;gi|137974|sp|P04534.2|VG22_BPT4;gi|5354220|gb|AAD42427.1|AF158101_14;gi|15299|emb|CAA34509.1|	77.04	87.04	270	61	1	1	270	1	269	2e-116	340	gp22 prohead core scaffold protein [Enterobacteria phage T4]
ORF121	gi|314121750|ref|YP_004063869.1|;gi|313151507|gb|ADR32563.1|	75.6	86.8	250	59	2	1	248	1	250	3e-116	339	prohead core protein [Enterobacteria phage vB_EcoM-VR7]
ORF122	gi|32453666|ref|NP_861875.1|;gi|682124447|ref|YP_009056759.1|;gi|32350485|gb|AAP76084.1|;gi|604671882|gb|AHV82876.1|;gi|815007329|gb|AKE45106.1|;gi|815008147|gb|AKE45921.1|;gi|815009143|gb|AKE46910.1|	100	100	213	0	0	1	213	1	213	2e-154	431	prohead core scaffolding protein and protease [Enterobacteria phage RB69]
ORF122	gi|642905815|ref|YP_009037596.1|;gi|642903969|gb|AIA79989.1|	99.53	99.53	213	1	0	1	213	1	213	9e-154	430	prohead core scaffolding protein and protease [Escherichia phage vB_EcoM_JS09]
ORF122	gi|725949983|ref|YP_009100718.1|;gi|678223619|gb|AIM50759.1|	99.07	99.07	215	0	1	1	213	1	215	2e-152	427	prohead core scaffold and protease [Shigella phage Shf125875]
ORF122	gi|408387102|gb|AFU64111.1|	89.25	94.86	214	22	1	1	213	1	214	3e-139	393	prohead assembly (scaffolding) protein [Salmonella phage STML-198]
ORF122	gi|116326393|ref|YP_803113.1|;gi|115343986|gb|ABI94995.1|	88.63	94.79	211	22	1	1	211	1	209	3e-136	386	prohead core scaffold protein and protease [Enterobacteria phage RB32]
ORF122	gi|228861105|ref|YP_002854128.1|;gi|228861485|ref|YP_002854506.1|;gi|330858690|ref|YP_004415065.1|;gi|414086535|ref|YP_006986724.1|;gi|422934588|ref|YP_007004549.1|;gi|422934953|ref|YP_007004913.1|;gi|639438822|ref|YP_009030779.1|;gi|712915006|ref|YP_009102643.1|;gi|713322472|ref|YP_009098556.1|;gi|713322760|ref|YP_009102375.1|;gi|730984898|ref|YP_009110991.1|;gi|215868|gb|AAA32501.1|;gi|22743850…	88.63	94.79	211	22	1	1	211	1	209	3e-136	386	gp21 prohead core scaffold protein and protease [Enterobacteria phage RB51]
ORF122	gi|9632595|ref|NP_049785.1|;gi|20141628|sp|P06807.2|PCPP_BPT4;gi|5354219|gb|AAD42426.1|AF158101_13	88.15	94.79	211	23	1	1	211	1	209	1e-135	384	gp21 prohead core scaffold protein and protease [Enterobacteria phage T4]
ORF122	gi|506564729|ref|WP_016031062.1|;gi|311993167|ref|YP_004010033.1|;gi|589889917|ref|YP_009005453.1|;gi|284178005|gb|ADB81671.1|;gi|583927830|gb|AHI61092.1|	87.38	95.33	214	25	2	1	213	1	213	2e-135	384	gp21 prohead core scaffold protein and protease [Enterobacteria phage CC31]
ORF122	gi|299779118|ref|YP_003734312.1|;gi|298105847|gb|ADI55491.1|	88.04	95.22	209	23	2	3	211	2	208	1e-132	376	21 gene product [Enterobacteria phage IME08]
ORF122	gi|161622605|ref|YP_001595299.1|;gi|238695323|ref|YP_002922516.1|;gi|52139928|gb|AAU29298.1|;gi|220029459|gb|ACL78393.1|	87.56	95.22	209	24	2	3	211	2	208	6e-132	375	gp21 prohead core scaffold protein and protease [Enterobacteria phage JS98]
ORF123	gi|32453665|ref|NP_861874.1|;gi|639163158|ref|YP_009030621.1|;gi|682124446|ref|YP_009056758.1|;gi|725949981|ref|YP_009100717.1|;gi|32350484|gb|AAP76083.1|;gi|601125972|gb|AHN82789.1|;gi|604671881|gb|AHV82875.1|;gi|678223617|gb|AIM50757.1|;gi|815007330|gb|AKE45107.1|;gi|815008146|gb|AKE45920.1|;gi|815009142|gb|AKE46909.1|	100	100	141	0	0	1	141	1	141	1e-97	282	prohead core protein [Enterobacteria phage RB69]
ORF123	gi|456351249|ref|YP_007501201.1|;gi|764161956|ref|YP_009126366.1|;gi|347466321|gb|AEO97107.1|;gi|586881593|gb|AHJ87013.1|	76.6	89.36	141	33	0	1	141	1	141	3e-66	202	prohead core protein [Salmonella phage S16]
ORF123	gi|408387101|gb|AFU64110.1|	76.6	89.36	141	33	0	1	141	1	141	5e-66	201	capsid and scaffold protein [Salmonella phage STML-198]
ORF123	gi|712915005|ref|YP_009102642.1|;gi|397134186|gb|AFO10693.1|	81.56	87.94	141	26	0	1	141	1	141	7e-66	201	phage capsid and scaffold protein [Escherichia phage ECML-134]
ORF123	gi|422934587|ref|YP_007004548.1|;gi|730984897|ref|YP_009110990.1|;gi|339791370|gb|AEK12427.1|;gi|694817610|gb|AIS73492.1|	80.14	88.65	141	28	0	1	141	1	141	3e-65	199	phage capsid and scaffold protein [Enterobacteria phage ime09]
ORF123	gi|9632685|ref|NP_049784.1|;gi|330858689|ref|YP_004415064.1|;gi|414086534|ref|YP_006986723.1|;gi|639438821|ref|YP_009030778.1|;gi|713322471|ref|YP_009098555.1|;gi|713322759|ref|YP_009102374.1|;gi|130046|sp|P04538.1|GP68_BPT4;gi|5354309|gb|AAD42516.1|AF158101_103;gi|15327|emb|CAA25656.1|;gi|215911|gb|AAA32521.1|;gi|299780529|gb|ADJ39891.1|;gi|327397623|gb|AEA73125.1|;gi|383396315|gb|AFH20131.1|;gi…	80.85	87.94	141	27	0	1	141	1	141	4e-65	199	gp68 prohead core protein [Enterobacteria phage T4]
ORF123	gi|228861484|ref|YP_002854505.1|;gi|227438500|gb|ACP30813.1|	80.14	87.94	141	28	0	1	141	1	141	2e-64	197	gp68 prohead core [Enterobacteria phage RB14]
ORF123	gi|228861104|ref|YP_002854127.1|;gi|422934952|ref|YP_007004912.1|;gi|227438778|gb|ACP31090.1|;gi|291290388|dbj|BAI83183.1|;gi|343177506|gb|AEM00832.1|;gi|698043311|gb|AIT75632.1|;gi|815008410|gb|AKE46183.1|	80.85	87.23	141	27	0	1	141	1	141	3e-64	197	gp68 prohead core [Enterobacteria phage RB51]
ORF123	gi|116326392|ref|YP_803112.1|;gi|115343985|gb|ABI94994.1|;gi|698042485|gb|AIT74809.1|	80.14	87.23	141	28	0	1	141	1	141	1e-63	196	prohead core [Enterobacteria phage RB32]
ORF123	gi|506564728|ref|WP_016031061.1|;gi|311993166|ref|YP_004010032.1|;gi|589889916|ref|YP_009005452.1|;gi|284178004|gb|ADB81670.1|;gi|583927829|gb|AHI61091.1|	73.05	85.11	141	38	0	1	141	1	141	4e-61	189	gp68 prohead core protein [Enterobacteria phage CC31]
ORF124	gi|32453664|ref|NP_861873.1|;gi|639163159|ref|YP_009030622.1|;gi|32350483|gb|AAP76082.1|;gi|601125973|gb|AHN82790.1|	98.73	98.73	79	0	1	1	79	1	78	5e-44	140	prohead core protein [Enterobacteria phage RB69]
ORF124	gi|725949980|ref|YP_009100716.1|;gi|678223616|gb|AIM50756.1|	97.47	97.47	79	1	1	1	79	1	78	4e-43	138	prohead core protein [Shigella phage Shf125875]
ORF124	gi|682124445|ref|YP_009056757.1|;gi|604671880|gb|AHV82874.1|	96.2	96.2	79	1	1	1	79	1	77	2e-42	136	prohead core protein [Escherichia phage vB_EcoM_PhAPEC2]
ORF124	gi|422934586|ref|YP_007004547.1|;gi|730984896|ref|YP_009110989.1|;gi|339791369|gb|AEK12426.1|;gi|694817609|gb|AIS73491.1|	66	76	50	17	0	1	50	1	50	2e-14	65.5	phage prohead core protein [Enterobacteria phage ime09]
ORF124	gi|713322758|ref|YP_009102373.1|;gi|698042210|gb|AIT74535.1|	64	74	50	18	0	1	50	1	50	1e-13	63.2	prohead core protein [Enterobacteria phage RB27]
ORF124	gi|729030776|gb|AIZ02529.1|	59.62	69.23	52	21	0	1	52	1	52	3e-13	62	prohead core protein [Enterobacteria phage vB_EcoM_VR25]
ORF124	gi|228861103|ref|YP_002854126.1|;gi|422934951|ref|YP_007004911.1|;gi|227438777|gb|ACP31089.1|;gi|291290387|dbj|BAI83182.1|;gi|343177505|gb|AEM00831.1|;gi|698043310|gb|AIT75631.1|;gi|815008409|gb|AKE46182.1|	64	72	50	18	0	1	50	1	50	3e-13	62	gp67 prohead core [Enterobacteria phage RB51]
ORF124	gi|414086533|ref|YP_006986722.1|;gi|383396314|gb|AFH20130.1|;gi|398313718|emb|CCI89065.1|	64	72	50	18	0	1	50	1	50	3e-13	61.6	prohead core protein [Enterobacteria phage vB_EcoM_ACG-C40]
ORF124	gi|456351248|ref|YP_007501200.1|;gi|347466320|gb|AEO97106.1|	62	68	50	19	0	4	53	5	54	8e-13	60.5	prohead core protein [Salmonella phage S16]
ORF124	gi|764161955|ref|YP_009126365.1|;gi|408387100|gb|AFU64109.1|;gi|586881592|gb|AHJ87012.1|	62	68	50	19	0	4	53	5	54	9e-13	60.5	prohead core protein [Salmonella phage STP4-a]
ORF125	gi|32453663|ref|NP_861872.1|;gi|32350482|gb|AAP76081.1|	99.81	100	523	1	0	1	523	1	523	0	1089	portal vertex protein [Enterobacteria phage RB69]
ORF125	gi|639163160|ref|YP_009030623.1|;gi|725949979|ref|YP_009100715.1|;gi|601125974|gb|AHN82791.1|;gi|678223615|gb|AIM50755.1|	99.81	99.81	523	1	0	1	523	1	523	0	1088	portal vertex protein [Escherichia phage vB_EcoM_JS09]
ORF125	gi|682124444|ref|YP_009056756.1|;gi|604671879|gb|AHV82873.1|	99.43	100	523	3	0	1	523	1	523	0	1086	portal vertex protein of head [Escherichia phage vB_EcoM_PhAPEC2]
ORF125	gi|116326390|ref|YP_803110.1|;gi|115343983|gb|ABI94992.1|;gi|698042483|gb|AIT74807.1|	89.69	95.99	524	53	1	1	523	1	524	0	1003	portal vertex of the head [Enterobacteria phage RB32]
ORF125	gi|712915003|ref|YP_009102640.1|;gi|397134184|gb|AFO10691.1|	89.31	95.99	524	55	1	1	523	1	524	0	1002	hypothetical protein ECML134_165 [Escherichia phage ECML-134]
ORF125	gi|713322469|ref|YP_009098553.1|;gi|698040572|gb|AIT72903.1|;gi|698040844|gb|AIT73174.1|;gi|698041116|gb|AIT73445.1|;gi|698041388|gb|AIT73716.1|;gi|698041661|gb|AIT73988.1|;gi|698041935|gb|AIT74261.1|	89.31	95.99	524	55	1	1	523	1	524	0	1002	portal vertex of the head [Enterobacteria phage RB3]
ORF125	gi|730984895|ref|YP_009110988.1|;gi|694817608|gb|AIS73490.1|	89.5	95.99	524	54	1	1	523	1	524	0	1002	hypothetical protein pSs1_00180 [Shigella phage pSs-1]
ORF125	gi|330858687|ref|YP_004415062.1|;gi|422934585|ref|YP_007004546.1|;gi|327397621|gb|AEA73123.1|;gi|339791368|gb|AEK12425.1|;gi|398313717|emb|CCI89064.1|;gi|587757283|gb|AHK11016.1|	89.31	95.99	524	55	1	1	523	1	524	0	1001	putative portal vertex of the head [Shigella phage Shfl2]
ORF125	gi|525334433|gb|AGR46115.1|	89.12	95.99	524	56	1	1	523	1	524	0	1001	portal vertex protein of head [Yersinia phage PST]
ORF125	gi|9632594|ref|NP_049782.1|;gi|228861102|ref|YP_002854125.1|;gi|414086532|ref|YP_006986721.1|;gi|422934950|ref|YP_007004910.1|;gi|20141827|sp|P13334.2|PORTL_BPT4;gi|5354218|gb|AAD42425.1|AF158101_12;gi|227438776|gb|ACP31088.1|;gi|291290386|dbj|BAI83181.1|;gi|299780527|gb|ADJ39889.1|;gi|343177504|gb|AEM00830.1|;gi|383396313|gb|AFH20129.1|;gi|628971787|gb|AHY83508.1|;gi|628971990|gb|AHY83710.1|;gi|…	89.12	95.99	524	56	1	1	523	1	524	0	1001	gp20 portal vertex protein of head [Enterobacteria phage T4]
ORF126	gi|32453662|ref|NP_861871.1|;gi|682124443|ref|YP_009056755.1|;gi|32350481|gb|AAP76080.1|;gi|604671878|gb|AHV82872.1|	100	100	163	0	0	1	163	1	163	4e-118	335	tail tube protein [Enterobacteria phage RB69]
ORF126	gi|639163161|ref|YP_009030624.1|;gi|725949978|ref|YP_009100714.1|;gi|601125975|gb|AHN82792.1|;gi|678223614|gb|AIM50754.1|;gi|815007333|gb|AKE45110.1|;gi|815008143|gb|AKE45917.1|;gi|815009139|gb|AKE46906.1|	99.39	100	163	1	0	1	163	1	163	1e-117	334	tail tube protein [Escherichia phage vB_EcoM_JS09]
ORF126	gi|116326389|ref|YP_803109.1|;gi|712915002|ref|YP_009102639.1|;gi|115343982|gb|ABI94991.1|;gi|116177486|gb|ABJ80689.1|;gi|397134183|gb|AFO10690.1|;gi|698042482|gb|AIT74806.1|	89.57	95.71	163	17	0	1	163	1	163	6e-108	310	tail tube monomer [Enterobacteria phage RB32]
ORF126	gi|587757282|gb|AHK11015.1|	88.96	95.71	163	18	0	1	163	1	163	9e-108	309	tail tube protein [Escherichia phage HY01]
ORF126	gi|9632593|ref|NP_049781.1|;gi|228861101|ref|YP_002854124.1|;gi|228861481|ref|YP_002854502.1|;gi|414086531|ref|YP_006986720.1|;gi|422934949|ref|YP_007004909.1|;gi|639438818|ref|YP_009030775.1|;gi|713322468|ref|YP_009098552.1|;gi|713322756|ref|YP_009102371.1|;gi|137956|sp|P13333.1|VG19_BPT4;gi|5354217|gb|AAD42424.1|AF158101_11;gi|215951|gb|AAA32542.1|;gi|227438497|gb|ACP30810.1|;gi|227438775|gb|AC…	88.34	95.71	163	19	0	1	163	1	163	2e-107	309	gp19 tail tube protein [Enterobacteria phage T4]
ORF126	gi|330858686|ref|YP_004415061.1|;gi|422934584|ref|YP_007004545.1|;gi|730984894|ref|YP_009110987.1|;gi|327397620|gb|AEA73122.1|;gi|339791367|gb|AEK12424.1|;gi|525334432|gb|AGR46114.1|;gi|694817607|gb|AIS73489.1|	88.34	95.71	163	19	0	1	163	1	163	2e-107	308	putative tail tube monomer [Shigella phage Shfl2]
ORF126	gi|398313716|emb|CCI89063.1|	87.73	95.09	163	20	0	1	163	1	163	7e-107	307	phage tail fibers [Yersinia phage phiD1]
ORF126	gi|6136196|sp|Q38435.1|TUBE_BPT6;gi|535234|emb|CAA84444.1|	87.73	95.09	163	20	0	1	163	1	163	3e-106	306	RecName: Full=Tail tube protein gp19; AltName: Full=Gene product 19; Short=gp19 [Enterobacteria phage T6]
ORF126	gi|506564725|ref|WP_016031058.1|;gi|311993163|ref|YP_004010029.1|;gi|284178001|gb|ADB81667.1|	79.01	89.51	162	34	0	1	162	1	162	2e-97	283	gp19 tail tube protein [Enterobacteria phage CC31]
ORF126	gi|456351246|ref|YP_007501198.1|;gi|764161953|ref|YP_009126363.1|;gi|347466318|gb|AEO97104.1|;gi|408387098|gb|AFU64107.1|;gi|586881590|gb|AHJ87010.1|	78.4	87.65	162	35	0	1	162	1	162	1e-96	281	tail tube protein [Salmonella phage S16]
ORF127	gi|725949977|ref|YP_009100713.1|;gi|678223613|gb|AIM50753.1|	99.55	99.7	660	2	1	1	659	1	660	0	1333	sheath protein [Shigella phage Shf125875]
ORF127	gi|639163162|ref|YP_009030625.1|;gi|601125976|gb|AHN82793.1|	99.39	99.7	660	3	1	1	659	1	660	0	1332	tail sheath protein [Escherichia phage vB_EcoM_JS09]
ORF127	gi|682124442|ref|YP_009056754.1|;gi|604671877|gb|AHV82871.1|	98.18	98.94	660	11	1	1	659	1	660	0	1318	tail sheath protein [Escherichia phage vB_EcoM_PhAPEC2]
ORF127	gi|32453661|ref|NP_861870.1|;gi|32350480|gb|AAP76079.1|	94.7	97.27	660	34	1	1	659	1	660	0	1280	tail sheath protein [Enterobacteria phage RB69]
ORF127	gi|730984892|ref|YP_009110985.1|;gi|694817605|gb|AIS73487.1|	83.92	91.96	659	105	1	1	658	1	659	0	1160	hypothetical protein pSs1_00177 [Shigella phage pSs-1]
ORF127	gi|713322466|ref|YP_009098550.1|;gi|698040569|gb|AIT72900.1|;gi|698040842|gb|AIT73172.1|;gi|698041114|gb|AIT73443.1|;gi|698041386|gb|AIT73714.1|;gi|698041659|gb|AIT73986.1|;gi|698041933|gb|AIT74259.1|	83.61	91.96	659	107	1	1	658	1	659	0	1159	tail sheath protein [Enterobacteria phage RB3]
ORF127	gi|587757281|gb|AHK11014.1|	83.92	91.81	659	105	1	1	658	1	659	0	1159	putative tail sheath protein [Escherichia phage HY01]
ORF127	gi|330858685|ref|YP_004415060.1|;gi|422934583|ref|YP_007004544.1|;gi|327397619|gb|AEA73121.1|;gi|339791366|gb|AEK12423.1|	83.76	91.81	659	106	1	1	658	1	659	0	1157	putative tail sheath monomer [Shigella phage Shfl2]
ORF127	gi|299780525|gb|ADJ39887.1|;gi|698042753|gb|AIT75076.1|;gi|698043027|gb|AIT75349.1|	83.46	91.81	659	108	1	1	658	1	659	0	1157	tail sheath protein [Enterobacteria phage T4T]
ORF127	gi|228861100|ref|YP_002854123.1|;gi|227438774|gb|ACP31086.1|;gi|698043307|gb|AIT75628.1|	83.31	91.96	659	109	1	1	658	1	659	0	1157	gp18 tail sheath monomer [Enterobacteria phage RB51]
ORF128	gi|639163163|ref|YP_009030626.1|;gi|601125977|gb|AHN82794.1|	99.67	99.84	611	2	0	1	611	1	611	0	1279	large terminase protein [Escherichia phage vB_EcoM_JS09]
ORF128	gi|682124441|ref|YP_009056753.1|;gi|604671876|gb|AHV82870.1|	99.51	100	611	3	0	1	611	1	611	0	1278	terminase DNA packaging enzyme, large subunit [Escherichia phage vB_EcoM_PhAPEC2]
ORF128	gi|32453660|ref|NP_861869.1|;gi|32350479|gb|AAP76078.1|	99.35	100	611	4	0	1	611	1	611	0	1276	large terminase protein [Enterobacteria phage RB69]
ORF128	gi|725949976|ref|YP_009100712.1|;gi|678223612|gb|AIM50752.1|	99.18	99.51	611	5	0	1	611	1	611	0	1273	terminase large subunit [Shigella phage Shf125875]
ORF128	gi|116326387|ref|YP_803107.1|;gi|639438816|ref|YP_009030773.1|;gi|115343980|gb|ABI94989.1|;gi|628971644|gb|AHY83366.1|;gi|698042480|gb|AIT74804.1|	90.51	94.76	611	57	1	1	611	1	610	0	1162	terminase subunit nuclease and ATPase [Enterobacteria phage RB32]
ORF128	gi|398313714|emb|CCI89061.1|	90.51	94.6	611	57	1	1	611	1	610	0	1161	phage terminase, large subunit [Yersinia phage phiD1]
ORF128	gi|712914999|ref|YP_009102636.1|;gi|397134180|gb|AFO10687.1|	90.34	94.6	611	58	1	1	611	1	610	0	1160	terminase large subunit [Escherichia phage ECML-134]
ORF128	gi|9632591|ref|NP_049776.1|;gi|137951|sp|P17312.1|TERL_BPT4;gi|5354215|gb|AAD42422.1|AF158101_9;gi|15201|emb|CAA36641.1|;gi|299780521|gb|ADJ39883.1|;gi|628971784|gb|AHY83505.1|;gi|628971987|gb|AHY83707.1|;gi|628972177|gb|AHY83896.1|;gi|698042752|gb|AIT75075.1|;gi|698043026|gb|AIT75348.1|	90.18	94.6	611	59	1	1	611	1	610	0	1159	gp17 terminase DNA packaging enzyme, large subunit [Enterobacteria phage T4]
ORF128	gi|713322465|ref|YP_009098549.1|;gi|698040568|gb|AIT72899.1|;gi|698040841|gb|AIT73171.1|;gi|698041113|gb|AIT73442.1|;gi|698041385|gb|AIT73713.1|;gi|698041658|gb|AIT73985.1|;gi|698041932|gb|AIT74258.1|	90.34	94.6	611	58	1	1	611	1	610	0	1159	large terminase protein [Enterobacteria phage RB3]
ORF128	gi|228861479|ref|YP_002854500.1|;gi|227438495|gb|ACP30808.1|	90.34	94.44	611	58	1	1	611	1	610	0	1159	gp17 terminase subunit [Enterobacteria phage RB14]
ORF129	gi|639163164|ref|YP_009030627.1|;gi|601125978|gb|AHN82795.1|	100	100	164	0	0	1	164	1	164	4e-119	338	small terminase protein [Escherichia phage vB_EcoM_JS09]
ORF129	gi|682124440|ref|YP_009056752.1|;gi|604671875|gb|AHV82869.1|	99.39	100	164	1	0	1	164	1	164	1e-118	337	terminase DNA packaging enzyme, small subunit [Escherichia phage vB_EcoM_PhAPEC2]
ORF129	gi|725949975|ref|YP_009100711.1|;gi|678223611|gb|AIM50751.1|	99.39	99.39	164	1	0	1	164	1	164	2e-118	336	terminase small subunit [Shigella phage Shf125875]
ORF129	gi|32453659|ref|NP_861868.1|;gi|32350478|gb|AAP76077.1|	98.78	98.78	164	2	0	1	164	1	164	1e-117	334	small terminase protein [Enterobacteria phage RB69]
ORF129	gi|330858683|ref|YP_004415058.1|;gi|327397617|gb|AEA73119.1|	89.63	95.73	164	17	0	1	164	1	164	5e-109	313	putative terminase DNA packaging enzyme [Shigella phage Shfl2]
ORF129	gi|9632590|ref|NP_049775.1|;gi|116326386|ref|YP_803106.1|;gi|228861098|ref|YP_002854121.1|;gi|228861478|ref|YP_002854499.1|;gi|414086528|ref|YP_006986717.1|;gi|422934581|ref|YP_007004542.1|;gi|422934946|ref|YP_007004906.1|;gi|639438815|ref|YP_009030772.1|;gi|712914998|ref|YP_009102635.1|;gi|730984890|ref|YP_009110983.1|;gi|137946|sp|P17311.1|TERS_BPT4;gi|5354214|gb|AAD42421.1|AF158101_8;gi|15200|…	89.02	95.12	164	18	0	1	164	1	164	3e-108	311	gp16 terminase DNA packaging enzyme, small subunit [Enterobacteria phage T4]
ORF129	gi|713322464|ref|YP_009098548.1|;gi|698040567|gb|AIT72898.1|;gi|698040840|gb|AIT73170.1|;gi|698041112|gb|AIT73441.1|;gi|698041384|gb|AIT73712.1|;gi|698041657|gb|AIT73984.1|;gi|698041931|gb|AIT74257.1|	88.41	95.12	164	19	0	1	164	1	164	1e-107	309	terminase small subunit [Enterobacteria phage RB3]
ORF129	gi|161622598|ref|YP_001595292.1|;gi|238695316|ref|YP_002922509.1|;gi|52139921|gb|AAU29291.1|;gi|220029452|gb|ACL78386.1|	78.66	90.24	164	34	1	1	164	1	163	1e-93	274	gp16 terminase DNA packaging enzyme small subunit [Enterobacteria phage JS98]
ORF129	gi|308814528|ref|YP_003934802.1|;gi|314121741|ref|YP_004063860.1|;gi|308206120|gb|ADO19519.1|;gi|313151498|gb|ADR32554.1|;gi|729030481|gb|AIZ02235.1|;gi|729030771|gb|AIZ02524.1|;gi|729031061|gb|AIZ02813.1|	79.75	90.18	163	32	1	1	163	1	162	1e-93	274	terminase DNA packaging enzyme small subunit [Shigella phage SP18]
ORF129	gi|422934247|ref|YP_007004283.1|;gi|345450756|gb|AEN93959.1|	78.66	89.63	164	34	1	1	164	1	163	1e-93	273	terminase DNA packaging enzyme small subunit [Enterobacteria phage Bp7]
ORF130	gi|725949974|ref|YP_009100710.1|;gi|678223610|gb|AIM50750.1|	100	100	273	0	0	1	273	1	273	0	567	sheath completion [Shigella phage Shf125875]
ORF130	gi|682124439|ref|YP_009056751.1|;gi|604671874|gb|AHV82868.1|	100	100	273	0	0	1	273	2	274	0	567	tail sheath stabilizer and completion protein [Escherichia phage vB_EcoM_PhAPEC2]
ORF130	gi|32453658|ref|NP_861867.1|;gi|639163165|ref|YP_009030628.1|;gi|32350477|gb|AAP76076.1|;gi|601125979|gb|AHN82796.1|	100	100	258	0	0	16	273	1	258	0	535	tail sheath stabilizer and completion protein [Enterobacteria phage RB69]
ORF130	gi|228861097|ref|YP_002854120.1|;gi|422934945|ref|YP_007004905.1|;gi|227438771|gb|ACP31083.1|;gi|291290381|dbj|BAI83176.1|;gi|343177499|gb|AEM00825.1|;gi|698043304|gb|AIT75625.1|;gi|815008403|gb|AKE46176.1|	77.99	88.03	259	57	0	1	259	1	259	4e-153	433	gp15 proximal tail sheath stabilizer [Enterobacteria phage RB51]
ORF130	gi|453056161|pdb|4HUH|A;gi|453056162|pdb|4HUH|B;gi|453056163|pdb|4HUH|C;gi|453056164|pdb|4HUH|D;gi|453056165|pdb|4HUH|E;gi|453056166|pdb|4HUH|F	77.61	87.64	259	58	0	1	259	1	259	8e-153	432	Chain A, Structure Of The Bacteriophage T4 Tail Terminator Protein, Gp15 (c- Terminal Truncation Mutant 1-261) [Enterobacteria phage T4]
ORF130	gi|713322752|ref|YP_009102367.1|;gi|698042204|gb|AIT74529.1|	77.99	87.26	259	57	0	1	259	1	259	1e-152	432	tail sheath stabilizer and completion protein [Enterobacteria phage RB27]
ORF130	gi|9632589|ref|NP_049774.1|;gi|639438814|ref|YP_009030771.1|;gi|20141824|sp|P11112.2|COMPL_BPT4;gi|453056155|pdb|4HUD|A;gi|453056156|pdb|4HUD|B;gi|453056157|pdb|4HUD|C;gi|453056158|pdb|4HUD|D;gi|453056159|pdb|4HUD|E;gi|453056160|pdb|4HUD|F;gi|459358313|pdb|3J2M|A;gi|459358314|pdb|3J2M|B;gi|459358315|pdb|3J2M|C;gi|459358316|pdb|3J2M|D;gi|459358317|pdb|3J2M|E;gi|459358318|pdb|3J2M|F;gi|459358325|pd…	77.61	87.64	259	58	0	1	259	1	259	1e-152	432	gp15 tail sheath stabilizer and completion protein [Enterobacteria phage T4]
ORF130	gi|422934580|ref|YP_007004541.1|;gi|339791363|gb|AEK12420.1|	77.61	87.26	259	58	0	1	259	1	259	2e-152	432	proximal tail sheath stabilization protein [Enterobacteria phage ime09]
ORF130	gi|22652099|gb|AAN03613.1|AF406556_8	77.99	87.64	259	57	0	1	259	1	259	3e-152	431	tail completion protein gp15 [Enterobacteria phage AR1]
ORF130	gi|414086527|ref|YP_006986716.1|;gi|730984889|ref|YP_009110982.1|;gi|383396308|gb|AFH20124.1|;gi|694817602|gb|AIS73484.1|	77.61	87.26	259	58	0	1	259	1	259	3e-152	431	tail sheath stabilizer and completion protein [Enterobacteria phage vB_EcoM_ACG-C40]
ORF131	gi|32453657|ref|NP_861866.1|;gi|682124438|ref|YP_009056750.1|;gi|725949973|ref|YP_009100709.1|;gi|32350476|gb|AAP76075.1|;gi|604671873|gb|AHV82867.1|;gi|678223609|gb|AIM50749.1|	100	100	254	0	0	1	254	1	254	0	517	neck protein [Enterobacteria phage RB69]
ORF131	gi|639163166|ref|YP_009030629.1|;gi|601125980|gb|AHN82797.1|	99.61	99.61	254	1	0	1	254	1	254	0	516	neck protein [Escherichia phage vB_EcoM_JS09]
ORF131	gi|422934579|ref|YP_007004540.1|;gi|299780518|gb|ADJ39880.1|;gi|339791362|gb|AEK12419.1|;gi|525334426|gb|AGR46108.1|;gi|698042749|gb|AIT75072.1|;gi|698043023|gb|AIT75345.1|	89.06	96.48	256	26	1	1	254	1	256	6e-168	469	phage neck protein [Enterobacteria phage ime09]
ORF131	gi|330858681|ref|YP_004415056.1|;gi|327397615|gb|AEA73117.1|	88.67	96.48	256	27	1	1	254	1	256	8e-168	469	putative head completion protein [Shigella phage Shfl2]
ORF131	gi|639438813|ref|YP_009030770.1|;gi|398313711|emb|CCI89058.1|;gi|628971641|gb|AHY83363.1|	88.67	96.48	256	27	1	1	254	1	256	9e-168	469	neck protein [Escherichia phage e11/2]
ORF131	gi|713322751|ref|YP_009102366.1|;gi|698042203|gb|AIT74528.1|	88.28	96.48	256	28	1	1	254	1	256	3e-167	468	neck protein [Enterobacteria phage RB27]
ORF131	gi|116326384|ref|YP_803104.1|;gi|115343977|gb|ABI94986.1|;gi|698042477|gb|AIT74801.1|	88.67	96.09	256	27	1	1	254	1	256	4e-167	468	head completion [Enterobacteria phage RB32]
ORF131	gi|422934944|ref|YP_007004904.1|;gi|22652098|gb|AAN03612.1|AF406556_7;gi|291290380|dbj|BAI83175.1|;gi|343177498|gb|AEM00824.1|;gi|815008402|gb|AKE46175.1|	88.28	96.09	256	28	1	1	254	1	256	4e-167	467	neck protein [Escherichia phage wV7]
ORF131	gi|730984888|ref|YP_009110981.1|;gi|694817601|gb|AIS73483.1|	88.67	96.09	256	27	1	1	254	1	256	5e-167	467	hypothetical protein pSs1_00173 [Shigella phage pSs-1]
ORF131	gi|9632588|ref|NP_049773.1|;gi|137939|sp|P11111.1|NECK2_BPT4;gi|5354212|gb|AAD42419.1|AF158101_6;gi|15296|emb|CAA33008.1|	88.67	96.09	256	27	1	1	254	1	256	5e-167	467	gp14 neck protein [Enterobacteria phage T4]
ORF132	gi|642905784|ref|YP_009037597.1|;gi|682124437|ref|YP_009056749.1|;gi|725949972|ref|YP_009100708.1|;gi|604671872|gb|AHV82866.1|;gi|642903938|gb|AIA79958.1|;gi|678223608|gb|AIM50748.1|;gi|815007339|gb|AKE45116.1|;gi|815008137|gb|AKE45911.1|;gi|815009133|gb|AKE46900.1|	99.68	99.68	308	1	0	1	308	1	308	0	637	neck protein [Escherichia phage vB_EcoM_JS09]
ORF132	gi|32453656|ref|NP_861865.1|;gi|32350475|gb|AAP76074.1|	99.35	99.68	308	2	0	1	308	1	308	0	636	neck protein [Enterobacteria phage RB69]
ORF132	gi|330858680|ref|YP_004415055.1|;gi|422934578|ref|YP_007004539.1|;gi|639438812|ref|YP_009030769.1|;gi|327397614|gb|AEA73116.1|;gi|339791361|gb|AEK12418.1|;gi|398313710|emb|CCI89057.1|;gi|628971640|gb|AHY83362.1|	85.44	95.15	309	44	1	1	308	1	309	0	565	putative neck protein [Shigella phage Shfl2]
ORF132	gi|713322750|ref|YP_009102365.1|;gi|698042202|gb|AIT74527.1|	85.44	95.15	309	44	1	1	308	1	309	0	564	neck protein [Enterobacteria phage RB27]
ORF132	gi|228861475|ref|YP_002854496.1|;gi|227438491|gb|ACP30804.1|;gi|525334425|gb|AGR46107.1|	85.11	95.15	309	45	1	1	308	1	309	0	564	gp13 neck protein [Enterobacteria phage RB14]
ORF132	gi|587757276|gb|AHK11009.1|	85.11	95.15	309	45	1	1	308	1	309	0	564	putative neck protein [Escherichia phage HY01]
ORF132	gi|414086525|ref|YP_006986714.1|;gi|383396306|gb|AFH20122.1|	84.79	94.82	309	46	1	1	308	1	309	0	563	neck protein [Enterobacteria phage vB_EcoM_ACG-C40]
ORF132	gi|299780517|gb|ADJ39879.1|;gi|698042748|gb|AIT75071.1|;gi|698043022|gb|AIT75344.1|	84.79	95.15	309	46	1	1	308	1	309	0	563	neck protein [Enterobacteria phage T4T]
ORF132	gi|116326383|ref|YP_803103.1|;gi|115343976|gb|ABI94985.1|;gi|698042476|gb|AIT74800.1|	85.11	94.82	309	45	1	1	308	1	309	0	563	neck protein [Enterobacteria phage RB32]
ORF132	gi|228861095|ref|YP_002854118.1|;gi|227438769|gb|ACP31081.1|;gi|698043302|gb|AIT75623.1|	84.79	94.82	309	46	1	1	308	1	309	0	563	gp13 neck protein [Enterobacteria phage RB51]
ORF133	gi|642905785|ref|YP_009037598.1|;gi|642903939|gb|AIA79959.1|	98.33	99.37	479	8	0	4	482	1	479	0	944	fibritin [Escherichia phage vB_EcoM_JS09]
ORF133	gi|32453655|ref|NP_861864.1|;gi|32350474|gb|AAP76073.1|	70.15	83.3	479	143	0	4	482	2	480	0	683	fibritin [Enterobacteria phage RB69]
ORF133	gi|682124436|ref|YP_009056748.1|;gi|604671871|gb|AHV82865.1|	69.94	83.09	479	144	0	4	482	2	480	0	681	fibritin neck whiskers [Escherichia phage vB_EcoM_PhAPEC2]
ORF133	gi|725949971|ref|YP_009100707.1|;gi|678223607|gb|AIM50747.1|	70.15	83.09	479	143	0	4	482	2	480	0	672	fibritin collar whiskers protein [Shigella phage Shf125875]
ORF133	gi|330858679|ref|YP_004415054.1|;gi|327397613|gb|AEA73115.1|	58.92	75.1	482	197	1	1	481	1	482	0	570	putative fibritin neck whisker protein [Shigella phage Shfl2]
ORF133	gi|299780516|gb|ADJ39878.1|;gi|698043021|gb|AIT75343.1|	58.71	75.31	482	198	1	1	481	1	482	0	568	fibritin [Enterobacteria phage T4T]
ORF133	gi|698042747|gb|AIT75070.1|	58.51	75.1	482	199	1	1	481	1	482	0	566	fibritin neck whiskers protein [Enterobacteria phage RB55]
ORF133	gi|903862|gb|AAA70300.1|	58.51	75.1	482	199	1	1	481	1	482	0	566	fibritin [Enterobacteria phage K3]
ORF133	gi|422934577|ref|YP_007004538.1|;gi|339791360|gb|AEK12417.1|	58.71	74.69	482	198	1	1	481	1	482	0	566	phage neck whiskers protein [Enterobacteria phage ime09]
ORF133	gi|525334424|gb|AGR46106.1|	58.51	75.1	482	199	1	1	481	1	482	0	565	fibritin neck whiskers [Yersinia phage PST]
ORF134	gi|642905786|ref|YP_009037335.1|;gi|642903940|gb|AIA79960.1|	97.83	98.62	508	10	1	1	507	1	508	0	1003	putative short tail fiber protein [Escherichia phage vB_EcoM_JS09]
ORF134	gi|330858678|ref|YP_004415053.1|;gi|327397612|gb|AEA73114.1|;gi|398313708|emb|CCI89055.1|	82.29	91.05	525	93	0	3	527	2	526	0	904	putative short tail fiber protein [Shigella phage Shfl2]
ORF134	gi|422934576|ref|YP_007004537.1|;gi|339791359|gb|AEK12416.1|	82.25	91.03	524	93	0	4	527	3	526	0	902	phage tail fiber protein [Enterobacteria phage ime09]
ORF134	gi|14876|emb|CAA39905.1|	81.68	91.22	524	96	0	4	527	3	526	0	897	gp12 [Enterobacteria phage T2]
ORF134	gi|525334423|gb|AGR46105.1|	81.87	90.84	524	95	0	4	527	3	526	0	894	short tail fibers [Yersinia phage PST]
ORF134	gi|299780515|gb|ADJ39877.1|;gi|698042746|gb|AIT75069.1|;gi|698043020|gb|AIT75342.1|	80.73	89.89	524	101	0	4	527	3	526	0	882	short tail fibers [Enterobacteria phage T4T]
ORF134	gi|229463012|sp|P10930.3|FIB12_BPT4	79.96	89.12	524	105	0	4	527	3	526	0	870	RecName: Full=Short tail fiber protein gp12; AltName: Full=Gene product 12; Short=gp12 [Enterobacteria phage T4]
ORF134	gi|9632586|ref|NP_049770.1|;gi|5354210|gb|AAD42417.1|AF158101_4;gi|15292|emb|CAA29951.1|	79.77	88.93	524	106	0	4	527	3	526	0	868	gp12 Short tail fibers [Enterobacteria phage T4]
ORF134	gi|226002|prf||1405334A	78.63	87.21	524	101	2	4	527	3	515	0	844	tail fiber protein [Enterobacteria phage T4]
ORF134	gi|725949970|ref|YP_009100706.1|;gi|678223606|gb|AIM50746.1|	64.14	76.47	527	174	7	3	527	2	515	0	650	short tail fibers protein [Shigella phage Shf125875]
ORF135	gi|642905787|ref|YP_009037336.1|;gi|642903941|gb|AIA79961.1|	99.09	99.09	219	2	0	1	219	1	219	7e-159	444	baseplate wedge subunit and tail pin [Escherichia phage vB_EcoM_JS09]
ORF135	gi|725949969|ref|YP_009100705.1|;gi|678223605|gb|AIM50745.1|	71.69	86.76	219	62	0	1	219	1	219	8e-120	344	baseplate wedge subunit [Shigella phage Shf125875]
ORF135	gi|32453653|ref|NP_861862.1|;gi|32350472|gb|AAP76071.1|	71.23	86.76	219	63	0	1	219	1	219	2e-119	343	baseplate wedge subunit and tail pin [Enterobacteria phage RB69]
ORF135	gi|682124434|ref|YP_009056746.1|;gi|604671869|gb|AHV82863.1|	71.23	86.76	219	63	0	1	219	1	219	2e-119	343	baseplate wedge subunit and tail pin [Escherichia phage vB_EcoM_PhAPEC2]
ORF135	gi|525334422|gb|AGR46104.1|	68.49	83.11	219	69	0	1	219	1	219	2e-111	323	baseplate wedge completion tail pin [Yersinia phage PST]
ORF135	gi|9632585|ref|NP_049769.1|;gi|137922|sp|P10929.1|BP11_BPT4;gi|7546219|pdb|1EL6|A;gi|7546220|pdb|1EL6|B;gi|7546221|pdb|1EL6|C;gi|34809690|pdb|1PDF|A;gi|34809691|pdb|1PDF|B;gi|34809692|pdb|1PDF|C;gi|34809693|pdb|1PDF|D;gi|34809694|pdb|1PDF|E;gi|34809695|pdb|1PDF|F;gi|34809696|pdb|1PDF|G;gi|34809697|pdb|1PDF|H;gi|34809698|pdb|1PDF|I;gi|34809699|pdb|1PDF|J;gi|34809700|pdb|1PDF|K;gi|34809701|pdb|1PDF…	67.58	83.11	219	71	0	1	219	1	219	3e-111	323	gp11 baseplate wedge subunit and tail pin [Enterobacteria phage T4]
ORF135	gi|330858677|ref|YP_004415052.1|;gi|327397611|gb|AEA73113.1|	67.58	82.19	219	71	0	1	219	1	219	8e-110	319	putative baseplate wedge subunit and tail pin [Shigella phage Shfl2]
ORF135	gi|422934575|ref|YP_007004536.1|;gi|339791358|gb|AEK12415.1|;gi|398313707|emb|CCI89054.1|	67.58	82.19	219	71	0	1	219	1	219	1e-109	319	phage baseplate wedge [Enterobacteria phage ime09]
ORF135	gi|639438809|ref|YP_009030766.1|;gi|713322747|ref|YP_009102362.1|;gi|628971637|gb|AHY83359.1|;gi|698042199|gb|AIT74524.1|	62.21	75.12	217	82	0	1	217	1	217	3e-97	287	baseplate wedge subunit and tail pin [Escherichia phage e11/2]
ORF135	gi|116326380|ref|YP_803100.1|;gi|115343973|gb|ABI94982.1|;gi|698042473|gb|AIT74797.1|	62.21	75.12	217	82	0	1	217	1	217	3e-97	287	base plate wedge completion tail pin [Enterobacteria phage RB32]
ORF136	gi|642905788|ref|YP_009037337.1|;gi|642903942|gb|AIA79962.1|	99.5	99.5	601	3	0	1	601	1	601	0	1217	baseplate wedge subunit and tail pin [Escherichia phage vB_EcoM_JS09]
ORF136	gi|725949968|ref|YP_009100704.1|;gi|678223604|gb|AIM50744.1|	80.46	90.23	604	115	1	1	601	1	604	0	1031	baseplate wedge subunit [Shigella phage Shf125875]
ORF136	gi|32453652|ref|NP_861861.1|;gi|32350471|gb|AAP76070.1|	80.13	90.07	604	117	1	1	601	1	604	0	1029	baseplate wedge subunit and tail pin [Enterobacteria phage RB69]
ORF136	gi|682124433|ref|YP_009056745.1|;gi|604671868|gb|AHV82862.1|	80.13	90.4	604	117	1	1	601	1	604	0	1029	baseplate wedge subunit and tail pin [Escherichia phage vB_EcoM_PhAPEC2]
ORF136	gi|422934939|ref|YP_007004899.1|;gi|343177493|gb|AEM00819.1|;gi|815008397|gb|AKE46170.1|	77.37	90.18	601	136	0	1	601	1	601	0	1003	baseplate wedge subunit and tail pin [Escherichia phage wV7]
ORF136	gi|713322746|ref|YP_009102361.1|;gi|698042198|gb|AIT74523.1|	77.2	90.18	601	137	0	1	601	1	601	0	1000	baseplate wedge subunit and tail pin [Enterobacteria phage RB27]
ORF136	gi|291290375|dbj|BAI83170.1|	77.2	90.18	601	137	0	1	601	1	601	0	1000	baseplate wedge completion tail pin [Enterobacteria phage AR1]
ORF136	gi|712914991|ref|YP_009102628.1|;gi|397134172|gb|AFO10679.1|	77.2	90.18	601	137	0	1	601	1	601	0	1000	baseplate wedge protein [Escherichia phage ECML-134]
ORF136	gi|414086521|ref|YP_006986710.1|;gi|383396302|gb|AFH20118.1|	76.87	90.18	601	139	0	1	601	1	601	0	999	baseplate wedge subunit and tail pin [Enterobacteria phage vB_EcoM_ACG-C40]
ORF136	gi|228861091|ref|YP_002854114.1|;gi|227438765|gb|ACP31077.1|;gi|698043298|gb|AIT75619.1|	77.2	89.85	601	137	0	1	601	1	601	0	999	gp10 base plate wedge completion tail pin [Enterobacteria phage RB51]
ORF137	gi|642905789|ref|YP_009037338.1|;gi|642903943|gb|AIA79963.1|	98.97	100	290	3	0	1	290	1	290	0	588	baseplate wedge tail fiber connector [Escherichia phage vB_EcoM_JS09]
ORF137	gi|32453651|ref|NP_861860.1|;gi|682124432|ref|YP_009056744.1|;gi|32350470|gb|AAP76069.1|;gi|604671867|gb|AHV82861.1|	75	83.68	288	71	1	3	290	1	287	1e-152	434	baseplate wedge tail fiber connector [Enterobacteria phage RB69]
ORF137	gi|725949967|ref|YP_009100703.1|;gi|678223603|gb|AIM50743.1|	75	83.68	288	71	1	3	290	1	287	2e-152	433	baseplate wedge connector for long tail fiber [Shigella phage Shf125875]
ORF137	gi|525334420|gb|AGR46102.1|	72.66	83.04	289	77	2	3	290	1	288	3e-150	427	baseplate wedge tail fiber connector [Yersinia phage PST]
ORF137	gi|730984882|ref|YP_009110975.1|;gi|587757270|gb|AHK11003.1|;gi|694817595|gb|AIS73477.1|	71.97	83.04	289	79	2	3	290	1	288	7e-150	426	hypothetical protein pSs1_00167 [Shigella phage pSs-1]
ORF137	gi|9632689|ref|NP_049767.1|;gi|137908|sp|P10927.1|BP09_BPT4;gi|6435819|pdb|1QEX|A;gi|6435820|pdb|1QEX|B;gi|34809744|pdb|1PDP|A;gi|34809745|pdb|1PDP|B;gi|34809746|pdb|1PDP|C;gi|34809747|pdb|1PDP|D;gi|34809748|pdb|1PDP|E;gi|34809749|pdb|1PDP|F;gi|34809750|pdb|1PDP|G;gi|34809751|pdb|1PDP|H;gi|34809752|pdb|1PDP|I;gi|34809753|pdb|1PDP|J;gi|34809754|pdb|1PDP|K;gi|34809755|pdb|1PDP|L;gi|34809756|pdb|1PD…	71.97	82.7	289	79	2	3	290	1	288	2e-149	425	gp9 baseplate wedge tail fiber connector [Enterobacteria phage T4]
ORF137	gi|228861090|ref|YP_002854113.1|;gi|422934573|ref|YP_007004534.1|;gi|712914990|ref|YP_009102627.1|;gi|227438764|gb|ACP31076.1|;gi|339791356|gb|AEK12413.1|;gi|397134171|gb|AFO10678.1|;gi|698043297|gb|AIT75618.1|	71.97	82.7	289	79	2	3	290	1	288	2e-149	425	gp9 base plate wedge completion tail fiber socket [Enterobacteria phage RB51]
ORF137	gi|639438807|ref|YP_009030764.1|;gi|628971635|gb|AHY83357.1|	72.32	82.7	289	78	2	3	290	1	288	3e-149	425	baseplate wedge tail fiber connector [Escherichia phage e11/2]
ORF137	gi|228861470|ref|YP_002854491.1|;gi|713322456|ref|YP_009098540.1|;gi|227438486|gb|ACP30799.1|;gi|698040559|gb|AIT72890.1|;gi|698040832|gb|AIT73162.1|;gi|698041104|gb|AIT73433.1|;gi|698041376|gb|AIT73704.1|;gi|698041649|gb|AIT73976.1|;gi|698041923|gb|AIT74249.1|	71.97	82.7	289	79	2	3	290	1	288	3e-149	425	gp9 base plate wedge completion tail fiber socket [Enterobacteria phage RB14]
ORF137	gi|330858675|ref|YP_004415050.1|;gi|327397609|gb|AEA73111.1|;gi|398313705|emb|CCI89052.1|	71.97	82.7	289	79	2	3	290	1	288	4e-149	424	putative baseplate wedge tail fiber connector [Shigella phage Shfl2]
ORF138	gi|642905790|ref|YP_009037339.1|;gi|642903944|gb|AIA79964.1|;gi|815007345|gb|AKE45122.1|;gi|815008131|gb|AKE45905.1|;gi|815009127|gb|AKE46894.1|	99.7	99.7	334	1	0	1	334	1	334	0	689	baseplate wedge subunit [Escherichia phage vB_EcoM_JS09]
ORF138	gi|682124431|ref|YP_009056743.1|;gi|725949966|ref|YP_009100702.1|;gi|604671866|gb|AHV82860.1|;gi|678223602|gb|AIM50742.1|	88.92	96.11	334	37	0	1	334	1	334	0	640	baseplate wedge subunit [Escherichia phage vB_EcoM_PhAPEC2]
ORF138	gi|32453650|ref|NP_861859.1|;gi|32350469|gb|AAP76068.1|	88.62	96.11	334	38	0	1	334	1	334	0	639	baseplate wedge subunit [Enterobacteria phage RB69]
ORF138	gi|228861469|ref|YP_002854490.1|;gi|227438485|gb|ACP30798.1|;gi|291290373|dbj|BAI83168.1|	89.22	94.61	334	36	0	1	334	1	334	0	635	gp8 base plate wedge [Enterobacteria phage RB14]
ORF138	gi|639438806|ref|YP_009030763.1|;gi|628971634|gb|AHY83356.1|	88.62	94.31	334	38	0	1	334	1	334	0	632	baseplate wedge subunit [Escherichia phage e11/2]
ORF138	gi|712914989|ref|YP_009102626.1|;gi|397134170|gb|AFO10677.1|	88.62	94.31	334	38	0	1	334	1	334	0	632	phage baseplate wedge [Escherichia phage ECML-134]
ORF138	gi|116326377|ref|YP_803097.1|;gi|228861089|ref|YP_002854112.1|;gi|115343970|gb|ABI94979.1|;gi|227438763|gb|ACP31075.1|;gi|698042470|gb|AIT74794.1|;gi|698043296|gb|AIT75617.1|	88.62	94.01	334	38	0	1	334	1	334	0	632	base plate wedge [Enterobacteria phage RB32]
ORF138	gi|330858674|ref|YP_004415049.1|;gi|327397608|gb|AEA73110.1|	88.32	93.71	334	39	0	1	334	1	334	0	631	putative baseplate wedge subunit [Shigella phage Shfl2]
ORF138	gi|9632688|ref|NP_049766.1|;gi|137905|sp|P19062.1|BP08_BPT4;gi|33357416|pdb|1N80|A;gi|33357417|pdb|1N80|B;gi|33357418|pdb|1N80|C;gi|33357419|pdb|1N80|D;gi|33357421|pdb|1N8B|A;gi|33357422|pdb|1N8B|B;gi|33357423|pdb|1N8B|C;gi|33357424|pdb|1N8B|D;gi|34809732|pdb|1PDM|A;gi|34809733|pdb|1PDM|B;gi|34809734|pdb|1PDM|C;gi|34809735|pdb|1PDM|D;gi|34809736|pdb|1PDM|E;gi|34809737|pdb|1PDM|F;gi|34809738|pdb|1…	88.32	94.01	334	39	0	1	334	1	334	0	631	gp8 baseplate wedge subunit [Enterobacteria phage T4]
ORF138	gi|525334419|gb|AGR46101.1|	88.32	94.01	334	39	0	1	334	1	334	0	629	baseplate wedge subunit [Yersinia phage PST]
ORF139	gi|642905791|ref|YP_009037340.1|;gi|642903945|gb|AIA79965.1|	98.74	99.52	1032	13	0	1	1032	1	1032	0	2117	baseplate wedge subunit [Escherichia phage vB_EcoM_JS09]
ORF139	gi|725949965|ref|YP_009100701.1|;gi|678223601|gb|AIM50741.1|	86.72	94.19	1032	137	0	1	1032	1	1032	0	1901	baseplate wedge initiator [Shigella phage Shf125875]
ORF139	gi|32453649|ref|NP_861858.1|;gi|32350468|gb|AAP76067.1|	86.63	94.19	1032	138	0	1	1032	1	1032	0	1900	baseplate wedge subunit [Enterobacteria phage RB69]
ORF139	gi|682124430|ref|YP_009056742.1|;gi|604671865|gb|AHV82859.1|	86.53	94.19	1032	139	0	1	1032	1	1032	0	1897	baseplate wedge initiator [Escherichia phage vB_EcoM_PhAPEC2]
ORF139	gi|414086518|ref|YP_006986707.1|;gi|383396299|gb|AFH20115.1|	82.36	90.79	1032	182	0	1	1032	1	1032	0	1799	baseplate wedge initiator [Enterobacteria phage vB_EcoM_ACG-C40]
ORF139	gi|639438805|ref|YP_009030762.1|;gi|628971633|gb|AHY83355.1|	82.36	90.79	1032	182	0	1	1032	1	1032	0	1798	baseplate wedge subunit [Escherichia phage e11/2]
ORF139	gi|713322743|ref|YP_009102358.1|;gi|698042195|gb|AIT74520.1|	82.36	90.89	1032	182	0	1	1032	1	1032	0	1798	baseplate wedge subunit [Enterobacteria phage RB27]
ORF139	gi|116326376|ref|YP_803096.1|;gi|115343969|gb|ABI94978.1|;gi|698042469|gb|AIT74793.1|	82.27	90.79	1032	183	0	1	1032	1	1032	0	1798	base plate wedge initiator [Enterobacteria phage RB32]
ORF139	gi|712914988|ref|YP_009102625.1|;gi|397134169|gb|AFO10676.1|	82.07	90.79	1032	185	0	1	1032	1	1032	0	1796	phage baseplate wedge initiator [Escherichia phage ECML-134]
ORF139	gi|330858673|ref|YP_004415048.1|;gi|327397607|gb|AEA73109.1|	82.17	90.6	1032	184	0	1	1032	1	1032	0	1794	putative baseplate wedge initiator [Shigella phage Shfl2]
ORF140	gi|642905792|ref|YP_009037341.1|;gi|642903946|gb|AIA79966.1|	99.7	99.85	657	2	0	1	657	1	657	0	1335	baseplate wedge subunit [Escherichia phage vB_EcoM_JS09]
ORF140	gi|725949964|ref|YP_009100700.1|;gi|678223600|gb|AIM50740.1|	95.59	97.87	657	28	1	1	657	1	656	0	1278	baseplate wedge subunit [Shigella phage Shf125875]
ORF140	gi|682124429|ref|YP_009056741.1|;gi|604671864|gb|AHV82858.1|	95.74	97.72	657	27	1	1	657	1	656	0	1277	baseplate wedge subunit [Escherichia phage vB_EcoM_PhAPEC2]
ORF140	gi|32453648|ref|NP_861857.1|;gi|32350467|gb|AAP76066.1|	95.13	97.41	657	31	1	1	657	1	656	0	1272	baseplate wedge subunit [Enterobacteria phage RB69]
ORF140	gi|713322742|ref|YP_009102357.1|;gi|698042194|gb|AIT74519.1|	87.88	94.09	660	77	2	1	657	1	660	0	1195	baseplate wedge subunit [Enterobacteria phage RB27]
ORF140	gi|291290371|dbj|BAI83166.1|	87.88	94.09	660	77	2	1	657	1	660	0	1195	baseplate wedge subunit [Enterobacteria phage AR1]
ORF140	gi|228861467|ref|YP_002854488.1|;gi|227438483|gb|ACP30796.1|	87.73	94.24	660	78	2	1	657	1	660	0	1195	gp6 base plate wedge [Enterobacteria phage RB14]
ORF140	gi|639438804|ref|YP_009030761.1|;gi|628971632|gb|AHY83354.1|	87.73	94.09	660	78	2	1	657	1	660	0	1194	baseplate wedge subunit [Escherichia phage e11/2]
ORF140	gi|712914987|ref|YP_009102624.1|;gi|299780509|gb|ADJ39871.1|;gi|397134168|gb|AFO10675.1|;gi|698042740|gb|AIT75063.1|;gi|698043014|gb|AIT75336.1|	87.73	94.09	660	78	2	1	657	1	660	0	1194	phage baseplate wedge [Escherichia phage ECML-134]
ORF140	gi|422934935|ref|YP_007004895.1|;gi|343177489|gb|AEM00815.1|;gi|815008393|gb|AKE46166.1|	87.58	94.24	660	79	2	1	657	1	660	0	1194	baseplate wedge subunit [Escherichia phage wV7]
ORF141	gi|642905793|ref|YP_009037342.1|;gi|642903947|gb|AIA79967.1|;gi|815007348|gb|AKE45125.1|;gi|815008128|gb|AKE45902.1|;gi|815009124|gb|AKE46891.1|	100	100	97	0	0	1	97	1	97	3e-66	199	hypothetical protein JS09_019 [Escherichia phage vB_EcoM_JS09]
ORF141	gi|725949963|ref|YP_009100699.1|;gi|678223599|gb|AIM50739.1|	98.97	100	97	1	0	1	97	1	97	9e-66	197	baseplate hub needle [Shigella phage Shf125875]
ORF141	gi|32453647|ref|NP_861856.1|;gi|32350466|gb|AAP76065.1|	97.94	100	97	2	0	1	97	1	97	1e-65	197	gp5.4 conserved hypothetical protein [Enterobacteria phage RB69]
ORF141	gi|414086516|ref|YP_006986705.1|;gi|383396297|gb|AFH20113.1|	91.75	95.88	97	8	0	1	97	1	97	5e-61	185	hypothetical protein ACG-C40_0149 [Enterobacteria phage vB_EcoM_ACG-C40]
ORF141	gi|9632654|ref|NP_049763.1|;gi|116326374|ref|YP_803094.1|;gi|228861086|ref|YP_002854109.1|;gi|228861466|ref|YP_002854487.1|;gi|330858671|ref|YP_004415046.1|;gi|422934569|ref|YP_007004530.1|;gi|422934934|ref|YP_007004894.1|;gi|639438803|ref|YP_009030760.1|;gi|712914986|ref|YP_009102623.1|;gi|713322741|ref|YP_009102356.1|;gi|730984878|ref|YP_009110971.1|;gi|731231|sp|P39234.1|Y08B_BPT4;gi|5354278|g…	91.75	95.88	97	8	0	1	97	1	97	1e-60	184	gp5.4 conserved hypothetical protein [Enterobacteria phage T4]
ORF141	gi|161622586|ref|YP_001595280.1|;gi|238695304|ref|YP_002922497.1|;gi|52139909|gb|AAU29279.1|;gi|220029440|gb|ACL78374.1|	90.72	95.88	97	9	0	1	97	1	97	4e-60	183	gp5.4 conserved hypothetical protein [Enterobacteria phage JS98]
ORF141	gi|299779099|ref|YP_003734293.1|;gi|298105828|gb|ADI55472.1|	90.72	95.88	97	9	0	1	97	18	114	4e-60	183	5.4 gene product [Enterobacteria phage IME08]
ORF141	gi|713322452|ref|YP_009098536.1|;gi|698040555|gb|AIT72886.1|;gi|698040828|gb|AIT73158.1|;gi|698041100|gb|AIT73429.1|;gi|698041372|gb|AIT73700.1|;gi|698041645|gb|AIT73972.1|;gi|698041919|gb|AIT74245.1|	90.72	94.85	97	9	0	1	97	1	97	7e-60	182	hypothetical protein RB3_150 [Enterobacteria phage RB3]
ORF141	gi|636666325|pdb|4KU0|D	91.67	95.83	96	8	0	2	97	1	96	1e-59	182	Chain D, Enterobacteria Phage T4 Gp5.4 Paar Repeat Protein In Complex With T4 Gp5 Beta-helix Fragment [Enterobacteria phage T4]
ORF141	gi|729030184|gb|AIZ01939.1|	86.6	94.85	97	13	0	1	97	1	97	4e-58	178	hypothetical protein VR5_152 [Enterobacteria phage vB_EcoM_VR5]
ORF142	gi|642905794|ref|YP_009037343.1|;gi|642903948|gb|AIA79968.1|	98.09	98.09	157	3	0	1	157	1	157	2e-110	316	hypothetical protein JS09_020 [Escherichia phage vB_EcoM_JS09]
ORF142	gi|725949962|ref|YP_009100698.1|;gi|678223598|gb|AIM50738.1|	94.27	96.82	157	9	0	1	157	1	157	1e-107	309	hypothetical protein [Shigella phage Shf125875]
ORF142	gi|32453646|ref|NP_861855.1|;gi|32350465|gb|AAP76064.1|	92.99	95.54	157	11	0	1	157	15	171	1e-97	283	hypothetical protein RB69p165 [Enterobacteria phage RB69]
ORF142	gi|299779098|ref|YP_003734292.1|;gi|298105827|gb|ADI55471.1|	73.33	81.21	165	36	2	1	157	24	188	7e-82	244	5.1 gene product [Enterobacteria phage IME08]
ORF142	gi|729030183|gb|AIZ01938.1|	71.95	80.49	164	38	2	1	156	15	178	1e-79	238	hypothetical protein VR5_151 [Enterobacteria phage vB_EcoM_VR5]
ORF142	gi|314121728|ref|YP_004063847.1|;gi|313151485|gb|ADR32541.1|	70.12	82.32	164	41	2	1	156	15	178	1e-78	236	gp5.1 conserved hypothetical protein [Enterobacteria phage vB_EcoM-VR7]
ORF142	gi|729030758|gb|AIZ02511.1|	70.12	81.71	164	41	2	1	156	15	178	2e-78	235	hypothetical protein VR25_167 [Enterobacteria phage vB_EcoM_VR25]
ORF142	gi|729031046|gb|AIZ02798.1|	69.51	82.93	164	42	2	1	156	17	180	7e-78	234	hypothetical protein VR26_161 [Enterobacteria phage vB_EcoM_VR26]
ORF142	gi|161622585|ref|YP_001595279.1|;gi|52139908|gb|AAU29278.1|	70.91	80.61	165	40	1	1	157	15	179	3e-77	232	gp5.1 conserved hypothetical protein [Enterobacteria phage JS98]
ORF142	gi|238695302|ref|YP_002922495.1|;gi|220029438|gb|ACL78372.1|	69.7	79.39	165	42	1	1	157	15	179	6e-76	229	gp5.1 conserved hypothetical protein [Enterobacteria phage JS10]
ORF143	gi|682124428|ref|YP_009056740.1|;gi|604671863|gb|AHV82857.1|	98.96	99.83	577	6	0	1	577	1	577	0	1175	baseplate hub subunit and tail lysozyme [Escherichia phage vB_EcoM_PhAPEC2]
ORF143	gi|725949961|ref|YP_009100697.1|;gi|678223597|gb|AIM50737.1|	98.61	99.83	577	8	0	1	577	1	577	0	1173	baseplate hub subunit tail lysozyme [Shigella phage Shf125875]
ORF143	gi|32453645|ref|NP_861854.1|;gi|32350464|gb|AAP76063.1|	98.44	99.65	577	9	0	1	577	1	577	0	1172	baseplate hub subunit and tail lysozyme [Enterobacteria phage RB69]
ORF143	gi|642905795|ref|YP_009037344.1|;gi|642903949|gb|AIA79969.1|	99.64	99.64	559	2	0	19	577	1	559	0	1143	baseplate hub subunit and tail lysozyme [Escherichia phage vB_EcoM_JS09]
ORF143	gi|422934932|ref|YP_007004892.1|;gi|343177486|gb|AEM00812.1|;gi|815008390|gb|AKE46163.1|	78.03	88.24	578	123	2	1	577	1	575	0	937	baseplate hub subunit and lysozyme [Escherichia phage wV7]
ORF143	gi|291290368|dbj|BAI83163.1|	78.03	88.06	578	123	2	1	577	1	575	0	936	tail-associated lysozyme [Enterobacteria phage AR1]
ORF143	gi|713322450|ref|YP_009098534.1|;gi|698040553|gb|AIT72884.1|;gi|698040826|gb|AIT73156.1|;gi|698041098|gb|AIT73427.1|;gi|698041370|gb|AIT73698.1|;gi|698041643|gb|AIT73970.1|;gi|698041917|gb|AIT74243.1|	77.85	87.89	578	124	2	1	577	1	575	0	936	base plate hub subunit and lysozyme [Enterobacteria phage RB3]
ORF143	gi|18655470|pdb|1K28|A	77.85	88.06	578	124	2	1	577	1	575	0	936	Chain A, The Structure Of The Bacteriophage T4 Cell-Puncturing Device [Enterobacteria phage T4]
ORF143	gi|9632651|ref|NP_049757.1|;gi|137895|sp|P16009.2|NEEDL_BPT4;gi|34809729|pdb|1PDL|A;gi|34809730|pdb|1PDL|B;gi|34809731|pdb|1PDL|C;gi|5354275|gb|AAD42482.1|AF158101_69;gi|15227|emb|CAA33749.1|;gi|299780503|gb|ADJ39865.1|;gi|698042736|gb|AIT75059.1|;gi|698043010|gb|AIT75332.1|	77.85	88.06	578	124	2	1	577	1	575	0	936	gp5 baseplate hub subunit and tail lysozyme [Enterobacteria phage T4]
ORF143	gi|330858669|ref|YP_004415044.1|;gi|327397603|gb|AEA73105.1|	77.85	88.06	578	124	2	1	577	1	575	0	936	putative baseplate hub subunit and tail lysozyme [Shigella phage Shfl2]
ORF144	gi|642905796|ref|YP_009037345.1|;gi|642903950|gb|AIA79970.1|	98.95	99.48	191	2	0	1	191	1	191	5e-138	389	baseplate wedge subunit [Escherichia phage vB_EcoM_JS09]
ORF144	gi|725949960|ref|YP_009100696.1|;gi|678223596|gb|AIM50736.1|	97.38	99.48	191	5	0	1	191	1	191	7e-137	385	baseplate wedge subunit [Shigella phage Shf125875]
ORF144	gi|682124427|ref|YP_009056739.1|;gi|604671862|gb|AHV82856.1|	97.38	98.95	191	5	0	1	191	1	191	3e-136	384	baseplate wedge subunit [Escherichia phage vB_EcoM_PhAPEC2]
ORF144	gi|32453644|ref|NP_861853.1|;gi|32350463|gb|AAP76062.1|	95.81	98.43	191	8	0	1	191	1	191	1e-134	380	baseplate wedge subunit [Enterobacteria phage RB69]
ORF144	gi|116326371|ref|YP_803091.1|;gi|115343964|gb|ABI94973.1|;gi|698042464|gb|AIT74788.1|	84.66	92.06	189	29	0	1	189	1	189	5e-118	338	base plate wedge completion [Enterobacteria phage RB32]
ORF144	gi|330858668|ref|YP_004415043.1|;gi|639438800|ref|YP_009030757.1|;gi|712914983|ref|YP_009102620.1|;gi|713322738|ref|YP_009102353.1|;gi|291290367|dbj|BAI83162.1|;gi|327397602|gb|AEA73104.1|;gi|397134164|gb|AFO10671.1|;gi|628971628|gb|AHY83350.1|;gi|698042190|gb|AIT74515.1|	84.66	91.53	189	29	0	1	189	1	189	9e-118	337	putative baseplate wedge completion [Shigella phage Shfl2]
ORF144	gi|9632658|ref|NP_049756.1|;gi|228861463|ref|YP_002854484.1|;gi|414086512|ref|YP_006986701.1|;gi|422934566|ref|YP_007004527.1|;gi|713322449|ref|YP_009098533.1|;gi|730984875|ref|YP_009110968.1|;gi|138060|sp|P16011.1|BP53_BPT4;gi|5354282|gb|AAD42489.1|AF158101_76;gi|15219|emb|CAA32949.1|;gi|15226|emb|CAA33748.1|;gi|227438479|gb|ACP30792.1|;gi|299780502|gb|ADJ39864.1|;gi|339791349|gb|AEK12406.1|;gi|…	84.66	91.53	189	29	0	1	189	1	189	1e-117	337	gp53 baseplate wedge subunit [Enterobacteria phage T4]
ORF144	gi|228861083|ref|YP_002854106.1|;gi|227438757|gb|ACP31069.1|;gi|698043290|gb|AIT75611.1|	84.66	91.53	189	29	0	1	189	1	189	2e-117	336	gp53 base plate wedge completion [Enterobacteria phage RB51]
ORF144	gi|398313697|emb|CCI89044.1|	83.25	90.58	191	32	0	1	191	1	191	9e-117	335	phage baseplate wedge [Yersinia phage phiD1]
ORF144	gi|422934931|ref|YP_007004891.1|;gi|343177485|gb|AEM00811.1|;gi|815008389|gb|AKE46162.1|	83.6	91.53	189	31	0	1	189	1	189	1e-116	334	baseplate wedge subunit [Escherichia phage wV7]
ORF145	gi|642905816|ref|YP_009037346.1|;gi|642903970|gb|AIA79990.1|	100	100	149	0	0	1	149	1	149	9e-108	308	head completion protein [Escherichia phage vB_EcoM_JS09]
ORF145	gi|725949959|ref|YP_009100695.1|;gi|678223595|gb|AIM50735.1|;gi|815007352|gb|AKE45129.1|;gi|815008124|gb|AKE45898.1|;gi|815009120|gb|AKE46887.1|	99.33	99.33	149	1	0	1	149	1	149	4e-107	306	head completion protein [Shigella phage Shf125875]
ORF145	gi|682124426|ref|YP_009056738.1|;gi|604671861|gb|AHV82855.1|	98.66	99.33	149	2	0	1	149	1	149	1e-106	305	head completion protein [Escherichia phage vB_EcoM_PhAPEC2]
ORF145	gi|32453643|ref|NP_861852.1|;gi|32350462|gb|AAP76061.1|	97.99	98.66	149	3	0	1	149	1	149	6e-106	303	head completion protein [Enterobacteria phage RB69]
ORF145	gi|9632650|ref|NP_049755.1|;gi|228861082|ref|YP_002854105.1|;gi|330858667|ref|YP_004415042.1|;gi|414086511|ref|YP_006986700.1|;gi|422934930|ref|YP_007004890.1|;gi|639438799|ref|YP_009030756.1|;gi|713322448|ref|YP_009098532.1|;gi|731108|sp|P15075.2|VG50_BPT4;gi|5354274|gb|AAD42481.1|AF158101_68;gi|15220|emb|CAA32950.1|;gi|227438756|gb|ACP31068.1|;gi|299780501|gb|ADJ39863.1|;gi|327397601|gb|AEA7310…	87.25	94.63	149	19	0	1	149	1	149	2e-96	279	gp4 head completion protein [Enterobacteria phage T4]
ORF145	gi|116326370|ref|YP_803090.1|;gi|422934565|ref|YP_007004526.1|;gi|730984874|ref|YP_009110967.1|;gi|115343963|gb|ABI94972.1|;gi|291290366|dbj|BAI83161.1|;gi|339791348|gb|AEK12405.1|;gi|398313696|emb|CCI89043.1|;gi|525334412|gb|AGR46094.1|;gi|587757262|gb|AHK10995.1|;gi|694817587|gb|AIS73469.1|;gi|698042463|gb|AIT74787.1|	87.25	94.63	149	19	0	1	149	1	149	9e-96	278	head completion [Enterobacteria phage RB32]
ORF145	gi|228861462|ref|YP_002854483.1|;gi|712914982|ref|YP_009102619.1|;gi|713322737|ref|YP_009102352.1|;gi|227438478|gb|ACP30791.1|;gi|397134163|gb|AFO10670.1|;gi|698042189|gb|AIT74514.1|	86.58	94.63	149	20	0	1	149	1	149	2e-95	277	gp4 head completion [Enterobacteria phage RB14]
ORF145	gi|311993144|ref|YP_004010010.1|;gi|284177982|gb|ADB81648.1|	74.5	85.91	149	38	0	1	149	1	149	3e-79	236	gp4 head completion protein [Enterobacteria phage CC31]
ORF145	gi|764446179|ref|WP_044369407.1|;gi|589889894|ref|YP_009005430.1|;gi|583927807|gb|AHI61069.1|	73.83	85.91	149	39	0	1	149	1	149	9e-79	234	head completion protein [Enterobacter phage PG7]
ORF145	gi|557581|gb|AAA50417.1|	85.83	95.83	120	17	0	30	149	5	124	2e-75	225	glycoprotein 50 [Enterobacteria phage T4]
ORF146	gi|725949958|ref|YP_009100694.1|;gi|678223594|gb|AIM50734.1|;gi|815007353|gb|AKE45130.1|;gi|815008123|gb|AKE45897.1|;gi|815009119|gb|AKE46886.1|	100	100	273	0	0	1	273	1	273	0	558	hypothetical protein [Shigella phage Shf125875]
ORF146	gi|642905817|ref|YP_009037347.1|;gi|642903971|gb|AIA79991.1|	99.63	100	273	1	0	1	273	1	273	0	558	DNA end protector protein [Escherichia phage vB_EcoM_JS09]
ORF146	gi|682124425|ref|YP_009056737.1|;gi|604671860|gb|AHV82854.1|	99.63	100	273	1	0	1	273	1	273	0	556	DNA end protector protein [Escherichia phage vB_EcoM_PhAPEC2]
ORF146	gi|32453642|ref|NP_861851.1|;gi|32350461|gb|AAP76060.1|	99.63	99.63	273	1	0	1	273	1	273	0	556	DNA end protector protein [Enterobacteria phage RB69]
ORF146	gi|9632607|ref|NP_049754.1|;gi|228861081|ref|YP_002854104.1|;gi|228861461|ref|YP_002854482.1|;gi|414086510|ref|YP_006986699.1|;gi|713322447|ref|YP_009098531.1|;gi|713322736|ref|YP_009102351.1|;gi|418216|sp|P15076.2|VG02_BPT4;gi|5354231|gb|AAD42438.1|AF158101_25;gi|15221|emb|CAA32951.1|;gi|227438477|gb|ACP30790.1|;gi|227438755|gb|ACP31067.1|;gi|291290365|dbj|BAI83160.1|;gi|299780500|gb|ADJ39862.1|…	77.21	90.81	272	60	2	1	271	1	271	3e-160	452	gp2 DNA end protector protein [Enterobacteria phage T4]
ORF146	gi|422934564|ref|YP_007004525.1|;gi|422934929|ref|YP_007004889.1|;gi|730984873|ref|YP_009110966.1|;gi|339791347|gb|AEK12404.1|;gi|343177483|gb|AEM00809.1|;gi|525334411|gb|AGR46093.1|;gi|694817586|gb|AIS73468.1|;gi|815008387|gb|AKE46160.1|	76.84	90.81	272	61	2	1	271	1	271	1e-159	450	phage DNA end protector during packaging [Enterobacteria phage ime09]
ORF146	gi|330858666|ref|YP_004415041.1|;gi|327397600|gb|AEA73102.1|	76.84	90.44	272	61	2	1	271	1	271	2e-159	449	putative DNA end protector protein [Shigella phage Shfl2]
ORF146	gi|587757261|gb|AHK10994.1|	76.47	90.81	272	62	2	1	271	1	271	2e-159	449	DNA end protector protein [Escherichia phage HY01]
ORF146	gi|712914981|ref|YP_009102618.1|;gi|397134162|gb|AFO10669.1|	76.84	90.44	272	61	2	1	271	1	271	3e-159	449	hypothetical protein ECML134_143 [Escherichia phage ECML-134]
ORF146	gi|116326369|ref|YP_803089.1|;gi|115343962|gb|ABI94971.1|;gi|698042462|gb|AIT74786.1|	76.84	90.07	272	61	2	1	271	1	271	6e-159	448	DNA end protector protein [Enterobacteria phage RB32]
ORF147	gi|682124424|ref|YP_009056736.1|;gi|604671859|gb|AHV82853.1|	100	100	194	0	0	1	194	1	194	2e-144	405	tail completion and sheath stabilizer protein [Escherichia phage vB_EcoM_PhAPEC2]
ORF147	gi|32453641|ref|NP_861850.1|;gi|32350460|gb|AAP76059.1|	98.97	100	194	2	0	1	194	1	194	1e-143	403	tail completion and sheath stabilizer protein [Enterobacteria phage RB69]
ORF147	gi|642905818|ref|YP_009037348.1|;gi|642903972|gb|AIA79992.1|	98.97	99.48	194	2	0	1	194	1	194	1e-143	403	tail completion and sheath stabilizer protein [Escherichia phage vB_EcoM_JS09]
ORF147	gi|725949957|ref|YP_009100693.1|;gi|678223593|gb|AIM50733.1|	97.94	98.97	194	4	0	1	194	1	194	1e-142	400	tail completion and sheath stabilizer protein [Shigella phage Shf125875]
ORF147	gi|330858665|ref|YP_004415040.1|;gi|327397599|gb|AEA73101.1|	65.32	82.08	173	60	0	1	173	1	173	9e-88	260	putative tail completion and sheath stabilizer protein [Shigella phage Shfl2]
ORF147	gi|422934563|ref|YP_007004524.1|;gi|339791346|gb|AEK12403.1|	65.32	82.08	173	60	0	1	173	1	173	1e-87	260	phage tail completion protein [Enterobacteria phage ime09]
ORF147	gi|414086509|ref|YP_006986698.1|;gi|639438796|ref|YP_009030753.1|;gi|712914980|ref|YP_009102617.1|;gi|383396290|gb|AFH20106.1|;gi|397134161|gb|AFO10668.1|;gi|398313694|emb|CCI89041.1|;gi|628971624|gb|AHY83346.1|	65.32	81.5	173	60	0	1	173	1	173	2e-87	259	tail completion and sheath stabilizer protein [Enterobacteria phage vB_EcoM_ACG-C40]
ORF147	gi|9632608|ref|NP_049753.1|;gi|116326367|ref|YP_803087.1|;gi|228861080|ref|YP_002854103.1|;gi|228861460|ref|YP_002854481.1|;gi|422934928|ref|YP_007004888.1|;gi|713322446|ref|YP_009098530.1|;gi|713322735|ref|YP_009102350.1|;gi|730984872|ref|YP_009110965.1|;gi|20141825|sp|P13331.3|TTTP_BPT4;gi|5354232|gb|AAD42439.1|AF158101_26;gi|15222|emb|CAA32952.1|;gi|115343960|gb|ABI94969.1|;gi|227438476|gb|ACP…	65.32	81.5	173	60	0	1	173	1	173	3e-87	259	gp3 tail completion and sheath stabilizer protein [Enterobacteria phage T4]
ORF147	gi|557583|gb|AAA50419.1|	65.32	81.5	173	60	0	1	173	1	173	3e-87	259	glycoprotein 3 [Enterobacteria phage T4]
ORF147	gi|456351224|ref|YP_007501176.1|;gi|448913684|gb|AGE48189.1|	57.29	76.04	192	80	1	5	194	3	194	4e-80	241	tail completion and sheath stabilizer protein [Salmonella phage S16]
ORF148	gi|642905819|ref|YP_009037349.1|;gi|642903973|gb|AIA79993.1|	99.59	99.59	244	1	0	1	244	1	244	6e-179	496	deoxynucleoside monophosphate kinase [Escherichia phage vB_EcoM_JS09]
ORF148	gi|725949956|ref|YP_009100692.1|;gi|678223592|gb|AIM50732.1|	98.77	99.59	244	3	0	1	244	1	244	2e-178	495	dNMP kinase [Shigella phage Shf125875]
ORF148	gi|682124423|ref|YP_009056735.1|;gi|604671858|gb|AHV82852.1|	96.31	97.54	244	9	0	1	244	1	244	3e-173	482	deoxynucleoside monophosphate kinase (dNMP kinase) [Escherichia phage vB_EcoM_PhAPEC2]
ORF148	gi|32453640|ref|NP_861849.1|;gi|75093200|sp|Q7Y4Y9.1|DNMK_BPR69;gi|32350459|gb|AAP76058.1|	95.9	97.54	244	10	0	1	244	1	244	5e-173	481	deoxynucleoside monophosphate kinase [Enterobacteria phage RB69]
ORF148	gi|1942708|pdb|1DEK|A;gi|1942709|pdb|1DEK|B	62.7	75.41	244	86	4	1	244	1	239	9e-101	298	Chain A, Deoxynucleoside Monophosphate Kinase Complexed With Deoxy-Gmp [Enterobacteria phage T4]
ORF148	gi|9632583|ref|NP_049752.1|;gi|712914979|ref|YP_009102616.1|;gi|125325|sp|P04531.1|DNMK_BPT4;gi|1942710|pdb|1DEL|A;gi|1942711|pdb|1DEL|B;gi|5354207|gb|AAD42414.1|AF158101_1;gi|15387|emb|CAA26800.1|;gi|299780498|gb|ADJ39860.1|;gi|397134160|gb|AFO10667.1|;gi|628971816|gb|AHY83537.1|;gi|628972013|gb|AHY83733.1|;gi|628972205|gb|AHY83924.1|;gi|698042731|gb|AIT75054.1|;gi|698043005|gb|AIT75327.1|	62.7	75.41	244	86	4	1	244	1	239	1e-100	297	gp1 dNMP kinase [Enterobacteria phage T4]
ORF148	gi|228861079|ref|YP_002854102.1|;gi|227438753|gb|ACP31065.1|;gi|698043286|gb|AIT75607.1|	62.7	75.82	244	86	4	1	244	1	239	2e-100	297	gp1 dNMP kinase [Enterobacteria phage RB51]
ORF148	gi|525334409|gb|AGR46091.1|	62.7	75	244	86	4	1	244	1	239	4e-100	296	dNMP kinase [Yersinia phage PST]
ORF148	gi|414086508|ref|YP_006986697.1|;gi|639438795|ref|YP_009030752.1|;gi|383396289|gb|AFH20105.1|;gi|628971623|gb|AHY83345.1|	62.7	75.41	244	86	4	1	244	1	239	6e-100	296	dNMP kinase [Enterobacteria phage vB_EcoM_ACG-C40]
ORF148	gi|713322445|ref|YP_009098529.1|;gi|698040548|gb|AIT72879.1|;gi|698040821|gb|AIT73151.1|;gi|698041093|gb|AIT73422.1|;gi|698041365|gb|AIT73693.1|;gi|698041638|gb|AIT73965.1|;gi|698041912|gb|AIT74238.1|	62.7	75.41	244	86	4	1	244	1	239	6e-100	296	deoxynucleoside monophosphate kinase [Enterobacteria phage RB3]
ORF149	gi|642905820|ref|YP_009037350.1|;gi|642903974|gb|AIA79994.1|	96.05	97.37	76	3	0	1	76	1	76	8e-43	137	chaperone for tail fiber formation [Escherichia phage vB_EcoM_JS09]
ORF149	gi|32453639|ref|NP_861848.1|;gi|682124422|ref|YP_009056734.1|;gi|32350458|gb|AAP76057.1|;gi|604671857|gb|AHV82851.1|	78.95	86.84	76	16	0	1	76	1	76	1e-31	108	gp57A chaperone for tail fiber formation [Enterobacteria phage RB69]
ORF149	gi|725949955|ref|YP_009100691.1|;gi|678223591|gb|AIM50731.1|	77.63	85.53	76	17	0	1	76	1	76	6e-31	107	tail fiber chaperone [Shigella phage Shf125875]
ORF149	gi|729031039|gb|AIZ02791.1|	58.97	78.21	78	30	2	1	76	1	78	7e-21	81.6	chaperone for tail fiber formation [Enterobacteria phage vB_EcoM_VR26]
ORF149	gi|729030176|gb|AIZ01931.1|	57.89	73.68	76	31	1	1	75	1	76	3e-20	79.7	chaperone for tail fiber formation [Enterobacteria phage vB_EcoM_VR5]
ORF149	gi|228861078|ref|YP_002854101.1|;gi|227438752|gb|ACP31064.1|;gi|698043285|gb|AIT75606.1|	60.53	81.58	76	28	2	1	75	1	75	5e-20	79.3	gp57A chaperone long and short tail fiber assembly [Enterobacteria phage RB51]
ORF149	gi|713322444|ref|YP_009098528.1|;gi|698040547|gb|AIT72878.1|;gi|698040820|gb|AIT73150.1|;gi|698041092|gb|AIT73421.1|;gi|698041364|gb|AIT73692.1|;gi|698041637|gb|AIT73964.1|;gi|698041911|gb|AIT74237.1|	58.44	81.82	77	30	2	1	76	1	76	5e-20	79.3	chaperone for tail fiber formation [Enterobacteria phage RB3]
ORF149	gi|47155484|dbj|BAD18928.1|;gi|291290362|dbj|BAI83157.1|;gi|525334408|gb|AGR46090.1|	60.53	81.58	76	28	2	1	75	1	75	5e-20	79.3	gp57 [Bacteriophage PP01] [Enterobacteria phage PP01]
ORF149	gi|116326365|ref|YP_803085.1|;gi|228861458|ref|YP_002854479.1|;gi|115343958|gb|ABI94967.1|;gi|227438474|gb|ACP30787.1|;gi|698042458|gb|AIT74782.1|	59.74	80.52	77	29	2	1	76	1	76	6e-20	79	chaperone long and short tail fiber assembly [Enterobacteria phage RB32]
ORF149	gi|161622578|ref|YP_001595272.1|;gi|160331900|gb|AAU29271.2|	57.89	73.68	76	31	1	1	75	1	76	2e-19	78.2	gp57A chaperone for tail fiber formation [Enterobacteria phage JS98]
ORF150	gi|642905821|ref|YP_009037351.1|;gi|682124421|ref|YP_009056733.1|;gi|604671856|gb|AHV82850.1|;gi|642903975|gb|AIA79995.1|	98.68	100	151	2	0	1	151	1	151	4e-109	312	hypothetical protein JS09_028 [Escherichia phage vB_EcoM_JS09]
ORF150	gi|32453638|ref|NP_861847.1|;gi|725949954|ref|YP_009100690.1|;gi|32350457|gb|AAP76056.1|;gi|678223590|gb|AIM50730.1|	98.68	99.34	151	2	0	1	151	1	151	2e-108	310	hypothetical protein RB69p157 [Enterobacteria phage RB69]
ORF150	gi|9632670|ref|NP_049750.1|;gi|713322443|ref|YP_009098527.1|;gi|713322732|ref|YP_009102347.1|;gi|137326|sp|P04533.1|VG57B_BPT4;gi|5354294|gb|AAD42501.1|AF158101_88;gi|299780496|gb|ADJ39858.1|;gi|628971857|gb|AHY83578.1|;gi|628972052|gb|AHY83772.1|;gi|628972245|gb|AHY83964.1|;gi|698040546|gb|AIT72877.1|;gi|698040819|gb|AIT73149.1|;gi|698041091|gb|AIT73420.1|;gi|698041363|gb|AIT73691.1|;gi|69804163…	86.09	92.05	151	21	0	1	151	2	152	6e-96	278	gp57B conserved hypothetical protein [Enterobacteria phage T4]
ORF150	gi|116326364|ref|YP_803084.1|;gi|228861457|ref|YP_002854478.1|;gi|414086506|ref|YP_006986695.1|;gi|422934560|ref|YP_007004521.1|;gi|422934925|ref|YP_007004885.1|;gi|639438793|ref|YP_009030750.1|;gi|712914977|ref|YP_009102614.1|;gi|730984869|ref|YP_009110962.1|;gi|15389|emb|CAA26802.1|;gi|115343957|gb|ABI94966.1|;gi|227438473|gb|ACP30786.1|;gi|291290361|dbj|BAI83156.1|;gi|339791343|gb|AEK12400.1|;…	86.09	92.05	151	21	0	1	151	1	151	1e-95	278	hypothetical protein RB32ORF142c [Enterobacteria phage RB32]
ORF150	gi|228861077|ref|YP_002854100.1|;gi|227438751|gb|ACP31063.1|;gi|698043284|gb|AIT75605.1|	85.43	91.39	151	22	0	1	151	1	151	4e-95	276	gp57B hypothetical protein [Enterobacteria phage RB51]
ORF150	gi|330858662|ref|YP_004415037.1|;gi|327397596|gb|AEA73098.1|	85.43	91.39	151	22	0	1	151	1	151	9e-95	275	hypothetical protein gp57b [Shigella phage Shfl2]
ORF150	gi|238695294|ref|YP_002922487.1|;gi|220029430|gb|ACL78364.1|	83.44	90.73	151	25	0	1	151	1	151	2e-93	272	gp57B conserved hypothetical protein [Enterobacteria phage JS10]
ORF150	gi|299779090|ref|YP_003734284.1|;gi|298105819|gb|ADI55463.1|	83.44	90.73	151	25	0	1	151	2	152	2e-93	272	57B gene product [Enterobacteria phage IME08]
ORF150	gi|161622481|ref|YP_001595271.1|;gi|160213787|gb|ABX11126.1|	83.44	90.73	151	25	0	1	151	1	151	2e-93	272	gp57B conserved hypothetical protein [Enterobacteria phage JS98]
ORF150	gi|729030175|gb|AIZ01930.1|	82.78	90.73	151	26	0	1	151	1	151	5e-93	271	hypothetical protein VR5_143 [Enterobacteria phage vB_EcoM_VR5]
ORF151	gi|32453636|ref|NP_861845.1|;gi|32350455|gb|AAP76054.1|	97.89	98.95	95	2	0	1	95	5	99	3e-61	186	IpI internal head protein [Enterobacteria phage RB69]
ORF151	gi|642905822|ref|YP_009037352.1|;gi|642903976|gb|AIA79996.1|	96.84	97.89	95	3	0	1	95	1	95	1e-60	184	internal head protein [Escherichia phage vB_EcoM_JS09]
ORF151	gi|725949953|ref|YP_009100689.1|;gi|678223589|gb|AIM50729.1|	96.84	98.95	95	3	0	1	95	1	95	2e-60	184	internal head protein 1 [Shigella phage Shf125875]
ORF151	gi|682124420|ref|YP_009056732.1|;gi|604671855|gb|AHV82849.1|	95.79	97.89	95	4	0	1	95	1	95	4e-60	183	internal head protein with nuclease inhibitor activity [Escherichia phage vB_EcoM_PhAPEC2]
ORF151	gi|398313690|emb|CCI89037.1|	91.58	93.68	95	7	1	1	95	1	94	4e-55	170	protein of unknown function [Yersinia phage phiD1]
ORF151	gi|9632754|ref|NP_049749.1|;gi|228861455|ref|YP_002854476.1|;gi|713322441|ref|YP_009098525.1|;gi|138542|sp|P03718.1|IPI1_BPT4;gi|5354378|gb|AAD42585.1|AF158101_172;gi|15390|emb|CAA26803.1|;gi|227438471|gb|ACP30784.1|;gi|299780495|gb|ADJ39857.1|;gi|628971906|gb|AHY83627.1|;gi|628972096|gb|AHY83816.1|;gi|628972291|gb|AHY84010.1|;gi|698040544|gb|AIT72875.1|;gi|698040817|gb|AIT73147.1|;gi|698041089|g…	87.37	91.58	95	12	0	1	95	1	95	2e-53	166	IpI internal head protein [Enterobacteria phage T4]
ORF151	gi|587757256|gb|AHK10989.1|	86.32	91.58	95	13	0	1	95	1	95	4e-53	165	IPI internal head protein [Escherichia phage HY01]
ORF151	gi|712914976|ref|YP_009102613.1|;gi|713322731|ref|YP_009102346.1|;gi|534937|emb|CAA84616.1|;gi|397134157|gb|AFO10664.1|;gi|698042183|gb|AIT74508.1|	82.29	86.46	96	16	1	1	95	1	96	2e-47	150	hypothetical protein ECML134_138 [Escherichia phage ECML-134]
ORF151	gi|162329908|pdb|2JUB|A	94.74	96.05	76	4	0	20	95	1	76	2e-45	145	Chain A, Solution Structure Of Ipi [Enterobacteria phage T4]
ORF151	gi|422934268|ref|YP_007004304.1|;gi|345450777|gb|AEN93980.1|	56.38	75.53	94	39	2	1	94	1	92	7e-29	103	internal head protein [Enterobacteria phage Bp7]
ORF152	gi|32453757|ref|NP_861844.1|;gi|642905823|ref|YP_009037353.1|;gi|682124419|ref|YP_009056731.1|;gi|725949951|ref|YP_009100687.1|;gi|32350576|gb|AAP76175.1|;gi|604671854|gb|AHV82848.1|;gi|642903977|gb|AIA79997.1|;gi|678223587|gb|AIM50727.1|;gi|815007360|gb|AKE45137.1|	100	100	61	0	0	1	61	1	61	2e-35	118	TRNA.4 conserved hypothetical protein [Enterobacteria phage RB69]
ORF152	gi|398313689|emb|CCI89036.1|	85.25	93.44	61	9	0	1	61	1	61	3e-30	104	protein of unknown function [Yersinia phage phiD1]
ORF152	gi|330858660|ref|YP_004415035.1|;gi|327397594|gb|AEA73096.1|	83.61	90.16	61	10	0	1	61	1	61	4e-29	101	hypothetical protein tRNA.4 [Shigella phage Shfl2]
ORF152	gi|9632851|ref|NP_049748.1|;gi|116326360|ref|YP_803080.1|;gi|228861075|ref|YP_002854098.1|;gi|228861454|ref|YP_002854475.1|;gi|414086503|ref|YP_006986692.1|;gi|422934558|ref|YP_007004519.1|;gi|422934923|ref|YP_007004883.1|;gi|639438790|ref|YP_009030747.1|;gi|713322440|ref|YP_009098524.1|;gi|713322730|ref|YP_009102345.1|;gi|141462|sp|P13322.1|Y07D_BPT4;gi|5354475|gb|AAD42682.1|AF158101_269;gi|1539…	83.61	90.16	61	10	0	1	61	1	61	7e-29	101	Trna.4 conserved hypothetical predicted membrane protein [Enterobacteria phage T4]
ORF152	gi|730984867|ref|YP_009110960.1|;gi|694817580|gb|AIS73462.1|	81.97	90.16	61	11	0	1	61	1	61	1e-28	100	hypothetical protein pSs1_00152 [Shigella phage pSs-1]
ORF152	gi|587757255|gb|AHK10988.1|	81.97	88.52	61	11	0	1	61	1	61	3e-28	99.8	hypothetical protein HY01_0131 [Escherichia phage HY01]
ORF152	gi|712914974|ref|YP_009102611.1|;gi|397134155|gb|AFO10662.1|	81.97	88.52	61	11	0	1	61	1	61	3e-28	99.8	hypothetical protein ECML134_136 [Escherichia phage ECML-134]
ORF152	gi|729030172|gb|AIZ01927.1|	70.49	81.97	61	18	0	1	61	1	61	1e-22	85.1	hypothetical protein VR5_140 [Enterobacteria phage vB_EcoM_VR5]
ORF152	gi|161622480|ref|YP_001595270.1|;gi|160213786|gb|ABX11125.1|	70.49	80.33	61	18	0	1	61	1	61	2e-22	84.7	Trna.4 conserved hypothetical predicted membrane protein [Enterobacteria phage JS98]
ORF152	gi|238695293|ref|YP_002922486.1|;gi|220029429|gb|ACL78363.1|	70.49	80.33	61	18	0	1	61	1	61	3e-22	84.3	Trna.4 conserved hypothetical predicted membrane protein [Enterobacteria phage JS10]
ORF153	gi|32453756|ref|NP_861843.1|;gi|32350575|gb|AAP76174.1|	97.5	97.5	120	3	0	1	120	1	120	9e-85	248	TRNA.3 conserved hypothetical protein [Enterobacteria phage RB69]
ORF153	gi|642905824|ref|YP_009037354.1|;gi|642903978|gb|AIA79998.1|	94.17	95.83	120	7	0	1	120	1	120	6e-82	240	hypothetical protein JS09_031 [Escherichia phage vB_EcoM_JS09]
ORF153	gi|725949950|ref|YP_009100686.1|;gi|678223586|gb|AIM50726.1|	92.5	95	120	9	0	1	120	1	120	1e-80	237	hypothetical protein [Shigella phage Shf125875]
ORF153	gi|682124418|ref|YP_009056730.1|;gi|604671853|gb|AHV82847.1|	91.67	94.17	120	10	0	1	120	1	120	7e-80	235	hypothetical protein PhAPEC2_138 [Escherichia phage vB_EcoM_PhAPEC2]
ORF153	gi|299779087|ref|YP_003734281.1|;gi|298105816|gb|ADI55460.1|	45.04	60.31	131	61	2	1	120	4	134	3e-30	109	trna.3 gene product [Enterobacteria phage IME08]
ORF153	gi|308814501|ref|YP_003934775.1|;gi|308206093|gb|ADO19492.1|	45.04	59.54	131	61	2	1	120	3	133	4e-29	106	hypothetical protein SP18_gp151 [Shigella phage SP18]
ORF153	gi|414086502|ref|YP_006986691.1|;gi|383396283|gb|AFH20099.1|	43.08	59.23	130	64	2	1	120	3	132	8e-28	102	hypothetical protein ACG-C40_0135 [Enterobacteria phage vB_EcoM_ACG-C40]
ORF153	gi|161622479|ref|YP_001595269.1|;gi|160213785|gb|ABX11124.1|	42.75	59.54	131	64	2	1	120	3	133	9e-28	102	Trna.3 conserved hypothetical protein [Enterobacteria phage JS98]
ORF153	gi|238695292|ref|YP_002922485.1|;gi|220029428|gb|ACL78362.1|	41.98	58.78	131	65	2	1	120	3	133	4e-27	100	Trna.3 conserved hypothetical protein [Enterobacteria phage JS10]
ORF153	gi|730984866|ref|YP_009110959.1|;gi|694817579|gb|AIS73461.1|	40.91	58.33	132	65	3	2	120	5	136	1e-22	89.4	hypothetical protein pSs1_00151 [Shigella phage pSs-1]
ORF154	gi|682124417|ref|YP_009056729.1|;gi|604671852|gb|AHV82846.1|	98.96	100	96	1	0	1	96	1	96	2e-64	194	hypothetical protein PhAPEC2_137 [Escherichia phage vB_EcoM_PhAPEC2]
ORF154	gi|32453755|ref|NP_861842.1|;gi|32350574|gb|AAP76173.1|	96.88	98.96	96	3	0	1	96	1	96	2e-63	192	TRNA.2 conserved hypothetical protein [Enterobacteria phage RB69]
ORF154	gi|725949949|ref|YP_009100685.1|;gi|678223585|gb|AIM50725.1|	96.88	98.96	96	3	0	1	96	1	96	7e-63	190	hypothetical protein [Shigella phage Shf125875]
ORF154	gi|642905825|ref|YP_009037355.1|;gi|642903979|gb|AIA79999.1|	90.62	94.79	96	9	0	1	96	1	96	8e-57	174	hypothetical protein JS09_032 [Escherichia phage vB_EcoM_JS09]
ORF154	gi|116326358|ref|YP_803078.1|;gi|115343951|gb|ABI94960.1|;gi|698042451|gb|AIT74775.1|	86.32	90.53	95	13	0	1	95	2	96	3e-53	166	hypothetical protein RB32ORF136c [Enterobacteria phage RB32]
ORF154	gi|713322728|ref|YP_009102343.1|;gi|698042180|gb|AIT74505.1|	86.32	90.53	95	13	0	1	95	1	95	3e-52	163	hypothetical protein RB27_138 [Enterobacteria phage RB27]
ORF154	gi|291290356|dbj|BAI83151.1|	84.95	90.32	93	14	0	1	93	1	93	3e-51	160	conserved hypothetical protein [Enterobacteria phage AR1]
ORF154	gi|398313687|emb|CCI89034.1|	80.65	88.17	93	18	0	1	93	1	93	6e-49	154	protein of unknown function [Yersinia phage phiD1]
ORF154	gi|712914972|ref|YP_009102609.1|;gi|397134153|gb|AFO10660.1|	87.36	90.8	87	11	0	1	87	1	87	3e-48	153	hypothetical protein ECML134_134 [Escherichia phage ECML-134]
ORF154	gi|299780492|gb|ADJ39854.1|	87.36	90.8	87	11	0	1	87	2	88	3e-48	153	hypothetical protein T4Tp137 [Enterobacteria phage T4T]
ORF155	gi|682124416|ref|YP_009056728.1|;gi|604671851|gb|AHV82845.1|	96.49	97.08	171	6	0	1	171	1	171	1e-115	330	hypothetical protein PhAPEC2_136 [Escherichia phage vB_EcoM_PhAPEC2]
ORF155	gi|32453635|ref|NP_861841.1|;gi|32350454|gb|AAP76053.1|	96.49	97.08	171	6	0	1	171	1	171	2e-115	330	RB69ORF151c hypothetical protein [Enterobacteria phage RB69]
ORF155	gi|642905826|ref|YP_009037356.1|;gi|642903980|gb|AIA80000.1|	94.15	95.91	171	10	0	1	171	1	171	1e-112	322	hypothetical protein JS09_033 [Escherichia phage vB_EcoM_JS09]
ORF155	gi|725949948|ref|YP_009100684.1|;gi|678223584|gb|AIM50724.1|	89.47	94.15	171	18	0	1	171	1	171	1e-105	305	hypothetical protein [Shigella phage Shf125875]
ORF155	gi|713322727|ref|YP_009102342.1|;gi|698042179|gb|AIT74504.1|	88.89	91.81	171	19	0	1	171	1	171	3e-104	301	hypothetical protein RB27_137 [Enterobacteria phage RB27]
ORF155	gi|291290355|dbj|BAI83150.1|	85.38	91.81	171	25	0	1	171	1	171	5e-102	295	conserved hypothetical protein [Enterobacteria phage AR1]
ORF155	gi|116326357|ref|YP_803077.1|;gi|115343950|gb|ABI94959.1|;gi|698042450|gb|AIT74774.1|	84.8	91.23	171	26	0	1	171	1	171	1e-100	291	hypothetical protein RB32ORF135c [Enterobacteria phage RB32]
ORF155	gi|398313686|emb|CCI89033.1|	84.21	91.23	171	27	0	1	171	1	171	6e-100	290	protein of unknown function [Yersinia phage phiD1]
ORF155	gi|238695290|ref|YP_002922483.1|;gi|220029426|gb|ACL78360.1|	47.37	63.74	171	77	4	1	171	1	158	3e-43	145	hypothetical protein EpJS10_0134 [Enterobacteria phage JS10]
ORF155	gi|161622477|ref|YP_001595267.1|;gi|160213783|gb|ABX11122.1|	46.2	63.16	171	79	4	1	171	1	158	8e-42	141	hypothetical protein EpJS98_gp138 [Enterobacteria phage JS98]
ORF156	gi|725949947|ref|YP_009100683.1|;gi|678223583|gb|AIM50723.1|	100	100	114	0	0	1	114	1	114	6e-82	240	hypothetical protein [Shigella phage Shf125875]
ORF156	gi|32453634|ref|NP_861840.1|;gi|32350453|gb|AAP76052.1|	94.74	98.25	114	6	0	1	114	1	114	1e-77	229	RB69ORF150c hypothetical protein [Enterobacteria phage RB69]
ORF156	gi|642905827|ref|YP_009037357.1|;gi|642903981|gb|AIA80001.1|	95.61	97.37	114	5	0	1	114	1	114	2e-77	228	hypothetical protein JS09_034 [Escherichia phage vB_EcoM_JS09]
ORF156	gi|682124415|ref|YP_009056727.1|;gi|604671850|gb|AHV82844.1|	92.11	94.74	114	9	0	1	114	1	114	1e-75	224	hypothetical protein PhAPEC2_135 [Escherichia phage vB_EcoM_PhAPEC2]
ORF156	gi|228861071|ref|YP_002854094.1|;gi|227438745|gb|ACP31057.1|;gi|698043278|gb|AIT75599.1|	69.57	84.35	115	34	1	1	114	1	115	8e-54	168	hypothetical protein RB51ORF141 [Enterobacteria phage RB51]
ORF156	gi|414086499|ref|YP_006986688.1|;gi|383396280|gb|AFH20096.1|	69.57	82.61	115	34	1	1	114	1	115	1e-53	168	hypothetical protein ACG-C40_0132 [Enterobacteria phage vB_EcoM_ACG-C40]
ORF156	gi|422934555|ref|YP_007004516.1|;gi|339791338|gb|AEK12395.1|	68.7	83.48	115	35	1	1	114	1	115	3e-53	167	hypothetical protein [Enterobacteria phage ime09]
ORF156	gi|291290352|dbj|BAI83147.1|	68.7	84.35	115	35	1	1	114	1	115	4e-53	167	conserved hypothetical protein [Enterobacteria phage AR1]
ORF156	gi|587757251|gb|AHK10984.1|	67.83	83.48	115	36	1	1	114	1	115	4e-53	166	hypothetical protein HY01_0127 [Escherichia phage HY01]
ORF156	gi|63107039|emb|CAI54242.1|	68.7	83.48	115	35	1	1	114	1	115	2e-52	165	trna.2 protein [Enterobacteria phage T2L]
ORF157	gi|725949946|ref|YP_009100682.1|;gi|678223582|gb|AIM50722.1|;gi|815007365|gb|AKE45142.1|	100	100	154	0	0	1	154	1	154	2e-108	310	hypothetical protein [Shigella phage Shf125875]
ORF157	gi|682124414|ref|YP_009056726.1|;gi|604671849|gb|AHV82843.1|	98.7	98.7	154	2	0	1	154	1	154	5e-107	306	hypothetical protein PhAPEC2_134 [Escherichia phage vB_EcoM_PhAPEC2]
ORF157	gi|713322726|ref|YP_009102341.1|;gi|698042178|gb|AIT74503.1|	75.48	86.45	155	35	3	1	154	1	153	6e-78	233	hypothetical protein RB27_136 [Enterobacteria phage RB27]
ORF157	gi|587757250|gb|AHK10983.1|	76.73	84.28	159	30	3	1	154	1	157	2e-74	224	hypothetical protein HY01_0126 [Escherichia phage HY01]
ORF157	gi|291290350|dbj|BAI83145.1|	76.73	83.65	159	30	3	1	154	1	157	2e-74	224	conserved hypothetical protein [Enterobacteria phage AR1]
ORF157	gi|712914970|ref|YP_009102607.1|;gi|397134151|gb|AFO10658.1|	76.1	83.65	159	31	3	1	154	1	157	6e-74	223	hypothetical protein ECML134_132 [Escherichia phage ECML-134]
ORF157	gi|422934554|ref|YP_007004515.1|;gi|339791337|gb|AEK12394.1|	76.1	83.65	159	31	3	1	154	1	157	6e-74	223	hypothetical protein [Enterobacteria phage ime09]
ORF157	gi|639438785|ref|YP_009030742.1|;gi|398313684|emb|CCI89031.1|;gi|628971613|gb|AHY83335.1|	76.1	83.02	159	31	3	1	154	1	157	8e-74	223	hypothetical protein e112_137 [Escherichia phage e11/2]
ORF157	gi|228861070|ref|YP_002854093.1|;gi|422934919|ref|YP_007004879.1|;gi|227438744|gb|ACP31056.1|;gi|343177473|gb|AEM00799.1|;gi|698043277|gb|AIT75598.1|;gi|815008377|gb|AKE46150.1|	76.1	83.02	159	31	3	1	154	1	157	8e-74	223	hypothetical protein RB51ORF140 [Enterobacteria phage RB51]
ORF157	gi|730984864|ref|YP_009110957.1|;gi|694817577|gb|AIS73459.1|	76.1	83.02	159	31	3	1	154	1	157	2e-73	222	hypothetical protein pSs1_00149 [Shigella phage pSs-1]
ORF158	gi|725949945|ref|YP_009100681.1|;gi|678223581|gb|AIM50721.1|	99.4	99.4	167	1	0	1	167	1	167	6e-117	333	hypothetical protein [Shigella phage Shf125875]
ORF158	gi|32453630|ref|NP_861836.1|;gi|32350449|gb|AAP76048.1|	92.31	96.7	91	7	0	1	91	10	100	1e-55	175	RB69ORF146c hypothetical protein [Enterobacteria phage RB69]
ORF158	gi|682124411|ref|YP_009056723.1|;gi|604671846|gb|AHV82840.1|	90.11	94.51	91	9	0	1	91	1	91	1e-54	172	hypothetical protein PhAPEC2_131 [Escherichia phage vB_EcoM_PhAPEC2]
ORF158	gi|642905829|ref|YP_009037359.1|;gi|642903983|gb|AIA80003.1|	91.21	93.41	91	8	0	1	91	1	91	1e-54	172	hypothetical protein JS09_036 [Escherichia phage vB_EcoM_JS09]
ORF158	gi|587757248|gb|AHK10981.1|	54.82	69.28	166	71	3	1	166	1	162	8e-49	160	hypothetical protein HY01_0124 [Escherichia phage HY01]
ORF158	gi|730984861|ref|YP_009110954.1|;gi|694817574|gb|AIS73456.1|	53.53	68.82	170	72	4	1	166	1	167	5e-48	157	hypothetical protein pSs1_00146 [Shigella phage pSs-1]
ORF158	gi|116326352|ref|YP_803072.1|;gi|228861068|ref|YP_002854091.1|;gi|422934917|ref|YP_007004877.1|;gi|115343945|gb|ABI94954.1|;gi|227438742|gb|ACP31054.1|;gi|343177471|gb|AEM00797.1|;gi|698042446|gb|AIT74770.1|;gi|698043275|gb|AIT75596.1|;gi|815008375|gb|AKE46148.1|	54.17	69.05	168	70	4	1	166	1	163	7e-48	157	hypothetical protein RB32ORF130c [Enterobacteria phage RB32]
ORF158	gi|299779083|ref|YP_003734277.1|;gi|298105812|gb|ADI55456.1|	39.77	64.77	88	48	2	85	167	46	133	1e-12	63.5	unnamed protein product [Enterobacteria phage IME08]
ORF158	gi|422934006|ref|YP_007004042.1|;gi|345450515|gb|AEN93718.1|	39.77	64.77	88	48	2	85	167	45	132	2e-12	62.8	hypothetical protein EpBp7_0001 [Enterobacteria phage Bp7]
ORF158	gi|729030443|gb|AIZ02197.1|	30.2	50.34	149	84	4	21	167	2	132	5e-11	58.9	hypothetical protein VR20_139 [Enterobacteria phage vB_EcoM_VR20]
ORF159	gi|32453629|ref|NP_861835.1|;gi|642905830|ref|YP_009037360.1|;gi|32350448|gb|AAP76047.1|;gi|642903984|gb|AIA80004.1|;gi|815007367|gb|AKE45144.1|	100	100	54	0	0	1	54	1	54	4e-33	111	RB69ORF145c hypothetical protein [Enterobacteria phage RB69]
ORF159	gi|228861449|ref|YP_002854470.1|;gi|330858654|ref|YP_004415029.1|;gi|713322436|ref|YP_009098520.1|;gi|227438465|gb|ACP30778.1|;gi|327397588|gb|AEA73090.1|;gi|525334399|gb|AGR46081.1|;gi|698040539|gb|AIT72870.1|;gi|698040812|gb|AIT73142.1|;gi|698041084|gb|AIT73413.1|;gi|698041356|gb|AIT73684.1|;gi|698041629|gb|AIT73956.1|;gi|698041903|gb|AIT74229.1|	98.11	100	53	1	0	1	53	1	53	2e-32	110	hypothetical protein RB14ORF134 [Enterobacteria phage RB14]
ORF159	gi|398313682|emb|CCI89029.1|	96.23	100	53	2	0	1	53	1	53	3e-32	109	protein of unknown function [Yersinia phage phiD1]
ORF159	gi|725949944|ref|YP_009100680.1|;gi|678223580|gb|AIM50720.1|	86.96	89.13	46	6	0	1	46	1	46	1e-22	84.7	hypothetical protein [Shigella phage Shf125875]
ORF159	gi|797192680|gb|AKA61112.1|	29.27	56.1	41	29	0	3	43	5	45	0.003	33.1	hypothetical protein [Enterobacteria phage JenK1]
ORF159	gi|797192582|gb|AKA61026.1|	26.83	56.1	41	30	0	3	43	5	45	0.01	31.6	hypothetical protein [Enterobacteria phage JenP2]
ORF159	gi|797192483|gb|AKA60939.1|	28.89	55.56	45	30	1	1	43	1	45	0.032	30.4	hypothetical protein [Enterobacteria phage JenP1]
ORF159	gi|593779249|ref|YP_009017081.1|;gi|345286852|gb|AEN79877.1|	30	55	40	25	1	5	41	224	263	1.2	27.7	gp17 [Mycobacterium phage Redi]
ORF159	gi|472339448|ref|YP_007672982.1|;gi|465283670|gb|AGH26804.1|	30.61	48.98	49	28	1	9	51	40	88	1.7	27.3	hypothetical protein SXBG_00067 [Synechococcus phage S-CAM1]
ORF159	gi|11863117|ref|NP_071834.1|;gi|11692737|gb|AAG39973.1|AF301375_33	37.5	45	40	25	0	7	46	6	45	2.1	26.9	hypothetical protein psiM100p32 [Methanothermobacter phage psiM100]
ORF160	gi|32453628|ref|NP_861834.1|;gi|725949943|ref|YP_009100679.1|;gi|32350447|gb|AAP76046.1|;gi|678223579|gb|AIM50719.1|	100	100	75	0	0	1	75	1	75	2e-50	157	Frd.3 conserved hypothetical protein [Enterobacteria phage RB69]
ORF160	gi|682124410|ref|YP_009056722.1|;gi|604671845|gb|AHV82839.1|	98.67	98.67	75	1	0	1	75	1	75	6e-50	155	hypothetical protein PhAPEC2_130 [Escherichia phage vB_EcoM_PhAPEC2]
ORF160	gi|642905831|ref|YP_009037361.1|;gi|642903985|gb|AIA80005.1|	98.67	98.67	75	1	0	1	75	1	75	2e-49	154	hypothetical protein JS09_038 [Escherichia phage vB_EcoM_JS09]
ORF160	gi|525334506|gb|AGR46188.1|	58.67	81.33	75	31	0	1	75	1	75	5e-30	105	hypothetical protein [Yersinia phage PST]
ORF160	gi|712915075|ref|YP_009102712.1|;gi|6136496|sp|Q38168.1|Y14E_BPT6;gi|951391|gb|AAA74668.1|;gi|397134256|gb|AFO10763.1|	58.67	80	75	31	0	1	75	1	75	1e-29	103	hypothetical protein ECML134_237 [Escherichia phage ECML-134]
ORF160	gi|9632749|ref|NP_049853.1|;gi|730984961|ref|YP_009111054.1|;gi|731249|sp|P39508.1|Y14E_BPT4;gi|51316721|sp|Q76VG7.1|Y14E_BPLZ5;gi|5354373|gb|AAD42580.1|AF158101_167;gi|668994|gb|AAA62285.1|;gi|951360|gb|AAA74644.1|;gi|951363|gb|AAA74646.1|;gi|951366|gb|AAA74648.1|;gi|951385|gb|AAA74663.1|;gi|951388|gb|AAA74666.1|;gi|951407|gb|AAA74679.1|;gi|951413|gb|AAA74683.1|;gi|32265033|gb|AAP78914.1|;gi|299…	58.67	80	75	31	0	1	75	1	75	1e-29	103	Frd.3 hypothetical protein [Enterobacteria phage T4]
ORF160	gi|51316726|sp|Q76VH2.1|Y14E_BPLZ1;gi|951398|gb|AAA74673.1|;gi|951410|gb|AAA74681.1|	58.67	80	75	31	0	1	75	1	75	2e-29	103	RecName: Full=Uncharacterized 8.8 kDa protein in frd-Gp32 intergenic region [Enterobacteria phage LZ1]
ORF160	gi|116326456|ref|YP_803176.1|;gi|115344049|gb|ABI95058.1|;gi|698042549|gb|AIT74873.1|	57.33	80	75	32	0	1	75	1	75	2e-29	103	hypothetical protein RB32ORF234c [Enterobacteria phage RB32]
ORF160	gi|414086607|ref|YP_006986796.1|;gi|383396388|gb|AFH20204.1|	56	78.67	75	33	0	1	75	1	75	1e-28	101	hypothetical protein ACG-C40_0238 [Enterobacteria phage vB_EcoM_ACG-C40]
ORF160	gi|422934175|ref|YP_007004211.1|;gi|345450684|gb|AEN93887.1|	54.67	80	75	34	0	1	75	7	81	5e-28	100	hypothetical protein EpBp7_0170 [Enterobacteria phage Bp7]
ORF161	gi|32453627|ref|NP_861833.1|;gi|642905832|ref|YP_009037362.1|;gi|682124409|ref|YP_009056721.1|;gi|725949942|ref|YP_009100678.1|;gi|32350446|gb|AAP76045.1|;gi|604671844|gb|AHV82838.1|;gi|642903986|gb|AIA80006.1|;gi|678223578|gb|AIM50718.1|;gi|815007369|gb|AKE45146.1|	100	100	197	0	0	1	197	1	197	8e-138	388	e.6 conserved hypothetical protein [Enterobacteria phage RB69]
ORF161	gi|330858653|ref|YP_004415028.1|;gi|327397587|gb|AEA73089.1|	88.83	94.42	197	22	0	1	197	1	197	3e-121	346	hypothetical protein e.6 [Shigella phage Shfl2]
ORF161	gi|9632743|ref|NP_049742.1|;gi|116326351|ref|YP_803071.1|;gi|228861067|ref|YP_002854090.1|;gi|228861448|ref|YP_002854469.1|;gi|422934916|ref|YP_007004876.1|;gi|639438782|ref|YP_009030739.1|;gi|731226|sp|P39224.1|Y06Q_BPT4;gi|5354367|gb|AAD42574.1|AF158101_161;gi|529568|gb|AAB59288.1|;gi|115343944|gb|ABI94953.1|;gi|227438464|gb|ACP30777.1|;gi|227438741|gb|ACP31053.1|;gi|299780488|gb|ADJ39850.1|;gi…	88.32	94.42	197	23	0	1	197	1	197	6e-121	345	e.6 conserved hypothetical protein [Enterobacteria phage T4]
ORF161	gi|525334398|gb|AGR46080.1|	88.32	94.42	197	23	0	1	197	1	197	7e-121	345	hypothetical protein [Yersinia phage PST]
ORF161	gi|398313681|emb|CCI89028.1|	87.82	94.42	197	24	0	1	197	1	197	9e-121	345	protein of unknown function [Yersinia phage phiD1]
ORF161	gi|414086495|ref|YP_006986684.1|;gi|383396276|gb|AFH20092.1|;gi|587757247|gb|AHK10980.1|	88.32	94.42	197	23	0	1	197	1	197	1e-120	345	hypothetical protein ACG-C40_0130 [Enterobacteria phage vB_EcoM_ACG-C40]
ORF161	gi|730984860|ref|YP_009110953.1|;gi|694817573|gb|AIS73455.1|	87.82	94.42	197	24	0	1	197	1	197	1e-120	345	hypothetical protein pSs1_00145 [Shigella phage pSs-1]
ORF161	gi|713322435|ref|YP_009098519.1|;gi|698040538|gb|AIT72869.1|;gi|698040811|gb|AIT73141.1|;gi|698041083|gb|AIT73412.1|;gi|698041355|gb|AIT73683.1|;gi|698041628|gb|AIT73955.1|;gi|698041902|gb|AIT74228.1|	87.31	94.42	197	25	0	1	197	1	197	2e-120	344	hypothetical protein RB3_133 [Enterobacteria phage RB3]
ORF161	gi|712914967|ref|YP_009102604.1|;gi|397134148|gb|AFO10655.1|	87.82	93.91	197	24	0	1	197	1	197	2e-120	344	hypothetical protein ECML134_129 [Escherichia phage ECML-134]
ORF161	gi|713322723|ref|YP_009102338.1|;gi|698042175|gb|AIT74500.1|	87.82	93.91	197	24	0	1	197	1	197	7e-120	343	hypothetical protein RB27_133 [Enterobacteria phage RB27]
ORF162	gi|32453626|ref|NP_861832.1|;gi|725949941|ref|YP_009100677.1|;gi|32350445|gb|AAP76044.1|;gi|678223577|gb|AIM50717.1|	97.49	99.5	199	5	0	1	199	1	199	3e-146	410	e.5 conserved hypothetical protein [Enterobacteria phage RB69]
ORF162	gi|682124408|ref|YP_009056720.1|;gi|604671843|gb|AHV82837.1|	97.5	99	200	5	0	1	200	1	200	1e-145	408	hypothetical protein PhAPEC2_128 [Escherichia phage vB_EcoM_PhAPEC2]
ORF162	gi|642905833|ref|YP_009037363.1|;gi|642903987|gb|AIA80007.1|	95	97	200	8	1	1	200	1	198	2e-139	392	hypothetical protein JS09_040 [Escherichia phage vB_EcoM_JS09]
ORF162	gi|587757246|gb|AHK10979.1|	47.67	68.39	193	98	1	5	194	6	198	5e-61	193	hypothetical protein HY01_0122 [Escherichia phage HY01]
ORF162	gi|9632742|ref|NP_049741.1|;gi|731225|sp|P39223.1|Y06P_BPT4;gi|5354366|gb|AAD42573.1|AF158101_160;gi|299780487|gb|ADJ39849.1|;gi|628971831|gb|AHY83552.1|;gi|628972028|gb|AHY83748.1|;gi|628972220|gb|AHY83939.1|;gi|698042720|gb|AIT75043.1|;gi|698042994|gb|AIT75316.1|	47.15	69.43	193	99	1	5	194	4	196	1e-59	190	e.5 conserved hypothetical protein [Enterobacteria phage T4]
ORF162	gi|529569|gb|AAB59289.1|	47.15	69.43	193	99	1	5	194	2	194	1e-59	190	msp4 [Enterobacteria phage T4]
ORF162	gi|422934549|ref|YP_007004510.1|;gi|339791332|gb|AEK12389.1|	46.88	69.27	192	100	1	5	194	2	193	2e-59	189	phage protein [Enterobacteria phage ime09]
ORF162	gi|228861447|ref|YP_002854468.1|;gi|227438463|gb|ACP30776.1|	46.46	68.18	198	103	1	5	199	2	199	2e-59	189	e.5 hypothetical protein [Enterobacteria phage RB14]
ORF162	gi|730984859|ref|YP_009110952.1|;gi|694817572|gb|AIS73454.1|	46.63	69.43	193	100	1	5	194	6	198	3e-59	189	hypothetical protein pSs1_00144 [Shigella phage pSs-1]
ORF162	gi|422934915|ref|YP_007004875.1|;gi|343177469|gb|AEM00795.1|	47.15	68.39	193	99	1	5	194	2	194	5e-59	188	hypothetical protein [Escherichia phage wV7]
ORF163	gi|725949940|ref|YP_009100676.1|;gi|678223576|gb|AIM50716.1|	96.95	99.24	131	4	0	1	131	1	131	3e-91	265	hypothetical protein [Shigella phage Shf125875]
ORF163	gi|682124407|ref|YP_009056719.1|;gi|604671842|gb|AHV82836.1|	98.39	99.19	124	2	0	8	131	1	124	2e-87	255	hypothetical protein PhAPEC2_127 [Escherichia phage vB_EcoM_PhAPEC2]
ORF163	gi|32453625|ref|NP_861831.1|;gi|32350444|gb|AAP76043.1|	97.58	99.19	124	3	0	8	131	1	124	4e-86	251	e.4 conserved hypothetical, predicted membrane protein [Enterobacteria phage RB69]
ORF163	gi|116326349|ref|YP_803069.1|;gi|115343942|gb|ABI94951.1|;gi|698042443|gb|AIT74767.1|	55.38	73.08	130	58	0	1	130	1	130	2e-51	163	hypothetical protein RB32ORF127c [Enterobacteria phage RB32]
ORF163	gi|9632741|ref|NP_049740.1|;gi|731224|sp|P39222.1|Y06O_BPT4;gi|5354365|gb|AAD42572.1|AF158101_159;gi|529570|gb|AAB59290.1|;gi|299780486|gb|ADJ39848.1|;gi|628971870|gb|AHY83591.1|;gi|628972064|gb|AHY83784.1|;gi|628972256|gb|AHY83975.1|;gi|698042719|gb|AIT75042.1|;gi|698042993|gb|AIT75315.1|	53.91	73.44	128	59	0	1	128	1	128	3e-50	160	e.4 conserved hypothetical, predicted membrane protein [Enterobacteria phage T4]
ORF163	gi|228861446|ref|YP_002854467.1|;gi|227438462|gb|ACP30775.1|	51.54	74.62	130	63	0	1	130	1	130	2e-49	159	e.4 hypothetical protein [Enterobacteria phage RB14]
ORF163	gi|730984858|ref|YP_009110951.1|;gi|694817571|gb|AIS73453.1|	53.08	72.31	130	61	0	1	130	1	130	1e-48	156	hypothetical protein pSs1_00143 [Shigella phage pSs-1]
ORF163	gi|398313679|emb|CCI89026.1|	52.31	70	130	62	0	1	130	1	130	3e-48	155	protein of unknown function [Yersinia phage phiD1]
ORF163	gi|713322433|ref|YP_009098517.1|;gi|713322721|ref|YP_009102336.1|;gi|698040536|gb|AIT72867.1|;gi|698040809|gb|AIT73139.1|;gi|698041081|gb|AIT73410.1|;gi|698041353|gb|AIT73681.1|;gi|698041626|gb|AIT73953.1|;gi|698041900|gb|AIT74226.1|;gi|698042173|gb|AIT74498.1|	50.77	73.85	130	64	0	1	130	1	130	3e-48	155	hypothetical protein RB3_131 [Enterobacteria phage RB3]
ORF163	gi|422934548|ref|YP_007004509.1|;gi|339791331|gb|AEK12388.1|	55.38	73.85	130	58	0	1	130	1	130	3e-45	147	predicted membrane protein [Enterobacteria phage ime09]
ORF164	gi|642905835|ref|YP_009037365.1|;gi|682124406|ref|YP_009056718.1|;gi|725949939|ref|YP_009100675.1|;gi|604671841|gb|AHV82835.1|;gi|642903989|gb|AIA80009.1|;gi|678223575|gb|AIM50715.1|	100	100	119	0	0	1	119	1	119	8e-85	248	putative membrane protein [Escherichia phage vB_EcoM_JS09]
ORF164	gi|32453624|ref|NP_861830.1|;gi|32350443|gb|AAP76042.1|;gi|815007372|gb|AKE45149.1|	99.16	100	119	1	0	1	119	1	119	2e-84	246	e.3 conserved hypothetical, predicted membrane protein [Enterobacteria phage RB69]
ORF164	gi|410492046|ref|YP_006907232.1|;gi|407437635|gb|AFU20395.1|	100	100	118	0	0	1	118	1	118	5e-84	246	hypothetical protein HX01_043 [Enterobacteria phage HX01]
ORF164	gi|422934913|ref|YP_007004873.1|;gi|343177467|gb|AEM00793.1|;gi|815008371|gb|AKE46144.1|	38.52	55.74	122	72	1	1	119	1	122	2e-21	85.9	hypothetical protein [Escherichia phage wV7]
ORF164	gi|639438779|ref|YP_009030736.1|;gi|628971607|gb|AHY83329.1|	39.5	57.98	119	71	1	1	119	1	118	8e-21	84.3	hypothetical protein e112_131 [Escherichia phage e11/2]
ORF164	gi|587757244|gb|AHK10977.1|	36.97	58.82	119	74	1	1	119	1	118	1e-20	84	transmembrane region domain-containing protein [Escherichia phage HY01]
ORF164	gi|525334395|gb|AGR46077.1|	38.66	58.82	119	72	1	1	119	1	118	8e-20	81.6	hypothetical protein [Yersinia phage PST]
ORF164	gi|291290343|dbj|BAI83138.1|	37.7	53.28	122	73	1	1	119	1	122	1e-19	81.3	conserved hypothetical protein [Enterobacteria phage AR1]
ORF164	gi|228861064|ref|YP_002854087.1|;gi|227438738|gb|ACP31050.1|;gi|698043271|gb|AIT75592.1|	38.52	55.74	122	72	1	1	119	1	122	6e-19	79.3	e.3 hypothetical protein [Enterobacteria phage RB51]
ORF164	gi|712914964|ref|YP_009102601.1|;gi|397134145|gb|AFO10652.1|	36.13	55.46	119	75	1	1	119	1	118	9e-19	78.6	hypothetical protein ECML134_126 [Escherichia phage ECML-134]
ORF165	gi|642905836|ref|YP_009037366.1|;gi|682124405|ref|YP_009056717.1|;gi|725949938|ref|YP_009100674.1|;gi|604671840|gb|AHV82834.1|;gi|642903990|gb|AIA80010.1|;gi|678223574|gb|AIM50714.1|	100	100	101	0	0	1	101	1	101	7e-69	206	hypothetical protein JS09_043 [Escherichia phage vB_EcoM_JS09]
ORF165	gi|32453623|ref|NP_861829.1|;gi|32350442|gb|AAP76041.1|	100	100	68	0	0	1	68	1	68	5e-43	139	RB69ORF139c hypothetical protein [Enterobacteria phage RB69]
ORF165	gi|729030164|gb|AIZ01919.1|	61.86	76.29	97	34	1	5	101	4	97	3e-37	125	hypothetical protein VR5_132 [Enterobacteria phage vB_EcoM_VR5]
ORF165	gi|299779079|ref|YP_003734273.1|;gi|298105808|gb|ADI55452.1|	62.38	71.29	101	34	2	1	101	1	97	2e-36	122	unnamed protein product [Enterobacteria phage IME08]
ORF165	gi|422934010|ref|YP_007004046.1|;gi|345450519|gb|AEN93722.1|	62.89	74.23	97	32	2	5	101	4	96	4e-36	122	hypothetical protein EpBp7_0005 [Enterobacteria phage Bp7]
ORF165	gi|238695283|ref|YP_002922476.1|;gi|220029419|gb|ACL78353.1|	62.89	75.26	97	32	2	5	101	4	96	4e-36	122	hypothetical protein EpJS10_0127 [Enterobacteria phage JS10]
ORF165	gi|161622468|ref|YP_001595258.1|;gi|160213774|gb|ABX11113.1|	62.89	75.26	97	32	2	5	101	4	96	1e-35	121	hypothetical protein EpJS98_gp129 [Enterobacteria phage JS98]
ORF165	gi|314121704|ref|YP_004063823.1|;gi|313151461|gb|ADR32517.1|;gi|729030438|gb|AIZ02192.1|	60.82	73.2	97	34	2	5	101	4	96	3e-34	117	hypothetical protein VR7_gp142 [Enterobacteria phage vB_EcoM-VR7]
ORF165	gi|308814492|ref|YP_003934766.1|;gi|308206084|gb|ADO19483.1|	59.79	73.2	97	35	2	5	101	4	96	1e-33	115	hypothetical protein SP18_gp141 [Shigella phage SP18]
ORF165	gi|729031021|gb|AIZ02773.1|	59.79	73.2	97	35	2	5	101	4	96	2e-33	115	hypothetical protein VR26_136 [Enterobacteria phage vB_EcoM_VR26]
ORF166	gi|642905837|ref|YP_009037367.1|;gi|642903991|gb|AIA80011.1|;gi|815007374|gb|AKE45151.1|	100	100	90	0	0	1	90	1	90	2e-62	188	hypothetical protein JS09_044 [Escherichia phage vB_EcoM_JS09]
ORF166	gi|682124404|ref|YP_009056716.1|;gi|604671839|gb|AHV82833.1|	98.89	100	90	1	0	1	90	1	90	1e-61	186	hypothetical protein PhAPEC2_124 [Escherichia phage vB_EcoM_PhAPEC2]
ORF166	gi|32453621|ref|NP_861827.1|;gi|32350440|gb|AAP76039.1|	97.78	98.89	90	2	0	1	90	1	90	4e-61	185	RB69ORF137c hypothetical protein [Enterobacteria phage RB69]
ORF166	gi|725949937|ref|YP_009100673.1|;gi|678223573|gb|AIM50713.1|	97.78	98.89	90	2	0	1	90	1	90	9e-61	184	hypothetical protein [Shigella phage Shf125875]
ORF166	gi|314121703|ref|YP_004063822.1|;gi|313151460|gb|ADR32516.1|;gi|729031020|gb|AIZ02772.1|	57.95	70.45	88	37	0	3	90	6	93	8e-29	103	hypothetical protein VR7_gp141 [Enterobacteria phage vB_EcoM-VR7]
ORF166	gi|308814491|ref|YP_003934765.1|;gi|308206083|gb|ADO19482.1|	55.68	68.18	88	39	0	3	90	6	93	3e-27	99	hypothetical protein SP18_gp140 [Shigella phage SP18]
ORF166	gi|729030437|gb|AIZ02191.1|	55.68	68.18	88	39	0	3	90	6	93	3e-27	99	hypothetical protein VR20_133 [Enterobacteria phage vB_EcoM_VR20]
ORF166	gi|161622467|ref|YP_001595257.1|;gi|238695282|ref|YP_002922475.1|;gi|299779078|ref|YP_003734272.1|;gi|160213773|gb|ABX11112.1|;gi|220029418|gb|ACL78352.1|;gi|298105807|gb|ADI55451.1|	55.81	67.44	86	38	0	5	90	8	93	2e-26	96.7	hypothetical protein EpJS98_gp128 [Enterobacteria phage JS98]
ORF166	gi|422934011|ref|YP_007004047.1|;gi|345450520|gb|AEN93723.1|	58.33	70.24	84	35	0	7	90	10	93	3e-25	94	hypothetical protein EpBp7_0006 [Enterobacteria phage Bp7]
ORF166	gi|729030732|gb|AIZ02485.1|	56.98	67.44	86	37	0	5	90	8	93	4e-25	93.6	hypothetical protein VR25_141 [Enterobacteria phage vB_EcoM_VR25]
ORF167	gi|682124403|ref|YP_009056715.1|;gi|604671838|gb|AHV82832.1|;gi|815007375|gb|AKE45152.1|	100	100	65	0	0	1	65	1	65	6e-41	132	hypothetical protein PhAPEC2_123 [Escherichia phage vB_EcoM_PhAPEC2]
ORF167	gi|32453620|ref|NP_861826.1|;gi|642905838|ref|YP_009037368.1|;gi|725949936|ref|YP_009100672.1|;gi|32350439|gb|AAP76038.1|;gi|642903992|gb|AIA80012.1|;gi|678223572|gb|AIM50712.1|	98.46	100	65	1	0	1	65	1	65	7e-40	129	RB69ORF136c hypothetical protein [Enterobacteria phage RB69]
ORF167	gi|729030436|gb|AIZ02190.1|	55.22	70.15	67	26	2	1	65	1	65	5e-17	70.9	hypothetical protein VR20_132 [Enterobacteria phage vB_EcoM_VR20]
ORF167	gi|314121702|ref|YP_004063821.1|;gi|313151459|gb|ADR32515.1|;gi|729031019|gb|AIZ02771.1|	53.73	70.15	67	27	2	1	65	1	65	3e-16	68.9	hypothetical protein VR7_gp140 [Enterobacteria phage vB_EcoM-VR7]
ORF167	gi|299779077|ref|YP_003734271.1|;gi|298105806|gb|ADI55450.1|	53.73	70.15	67	27	2	1	65	3	67	4e-16	68.6	unnamed protein product [Enterobacteria phage IME08]
ORF167	gi|161622466|ref|YP_001595256.1|;gi|238695281|ref|YP_002922474.1|;gi|160213772|gb|ABX11111.1|;gi|220029417|gb|ACL78351.1|	53.73	70.15	67	27	2	1	65	1	65	4e-16	68.6	hypothetical protein EpJS98_gp127 [Enterobacteria phage JS98]
ORF167	gi|308814490|ref|YP_003934764.1|;gi|308206082|gb|ADO19481.1|	53.73	68.66	67	27	2	1	65	1	65	5e-16	68.2	hypothetical protein SP18_gp139 [Shigella phage SP18]
ORF167	gi|729030731|gb|AIZ02484.1|	53.73	68.66	67	27	2	1	65	1	65	2e-15	66.6	hypothetical protein VR25_140 [Enterobacteria phage vB_EcoM_VR25]
ORF167	gi|729030162|gb|AIZ01917.1|	53.73	67.16	67	27	2	1	65	1	65	2e-15	66.6	hypothetical protein VR5_130 [Enterobacteria phage vB_EcoM_VR5]
ORF167	gi|746946513|gb|AJD81941.1|	40.28	48.61	72	34	2	1	65	1	70	5e-05	38.9	hypothetical protein YenMTG1_131 [Yersinia phage vB_YenM_TG1]
ORF168	gi|642905839|ref|YP_009037369.1|;gi|682124402|ref|YP_009056714.1|;gi|604671837|gb|AHV82831.1|;gi|642903993|gb|AIA80013.1|	98.73	100	79	1	0	1	79	1	79	2e-53	164	hypothetical protein JS09_046 [Escherichia phage vB_EcoM_JS09]
ORF168	gi|725949935|ref|YP_009100671.1|;gi|678223571|gb|AIM50711.1|	96.2	100	79	3	0	1	79	1	79	1e-52	163	hypothetical protein [Shigella phage Shf125875]
ORF168	gi|32453619|ref|NP_861825.1|;gi|32350438|gb|AAP76037.1|	97.47	100	79	2	0	1	79	1	79	1e-52	163	RB69ORF135c hypothetical protein [Enterobacteria phage RB69]
ORF168	gi|729030726|gb|AIZ02479.1|	73.33	85.33	75	19	1	1	75	1	74	2e-33	113	hypothetical protein VR25_135 [Enterobacteria phage vB_EcoM_VR25]
ORF168	gi|299779073|ref|YP_003734267.1|;gi|298105802|gb|ADI55446.1|	45	63.75	80	42	2	1	79	1	79	3e-16	69.7	unnamed protein product [Enterobacteria phage IME08]
ORF168	gi|422934016|ref|YP_007004052.1|;gi|345450525|gb|AEN93728.1|	43.75	62.5	80	43	2	1	79	1	79	3e-15	67	hypothetical protein EpBp7_0011 [Enterobacteria phage Bp7]
ORF168	gi|161622462|ref|YP_001595252.1|;gi|160213768|gb|ABX11107.1|	42.5	62.5	80	44	2	1	79	1	79	6e-15	66.2	hypothetical protein EpJS98_gp123 [Enterobacteria phage JS98]
ORF168	gi|729030158|gb|AIZ01913.1|	42.5	63.75	80	44	2	1	79	1	79	7e-15	66.2	hypothetical protein VR5_126 [Enterobacteria phage vB_EcoM_VR5]
ORF168	gi|238695277|ref|YP_002922470.1|;gi|220029413|gb|ACL78347.1|	40.96	60.24	83	44	2	1	79	1	82	5e-14	63.9	hypothetical protein EpJS10_0121 [Enterobacteria phage JS10]
ORF168	gi|509141738|ref|YP_008060603.1|;gi|479258565|gb|AGJ71488.1|	32	58	50	34	0	30	79	44	93	0.0001	38.1	hypothetical protein Lw1_gp080 [Escherichia phage Lw1]
ORF169	gi|725949934|ref|YP_009100670.1|;gi|678223570|gb|AIM50710.1|	99.06	99.69	318	3	0	1	318	1	318	0	668	hypothetical protein [Shigella phage Shf125875]
ORF169	gi|642905840|ref|YP_009037370.1|;gi|642903994|gb|AIA80014.1|	98.43	98.74	318	5	0	1	318	1	318	0	661	hypothetical protein JS09_047 [Escherichia phage vB_EcoM_JS09]
ORF169	gi|32453618|ref|NP_861824.1|;gi|32350437|gb|AAP76036.1|	97.48	99.06	318	8	0	1	318	1	318	0	657	RB69ORF134c hypothetical protein [Enterobacteria phage RB69]
ORF169	gi|682124401|ref|YP_009056713.1|;gi|604671836|gb|AHV82830.1|	96.86	98.74	318	10	0	1	318	1	318	0	653	hypothetical protein PhAPEC2_121 [Escherichia phage vB_EcoM_PhAPEC2]
ORF169	gi|299779072|ref|YP_003734266.1|;gi|298105801|gb|ADI55445.1|	74.21	87.11	318	82	0	1	318	27	344	0	518	unnamed protein product [Enterobacteria phage IME08]
ORF169	gi|729030157|gb|AIZ01912.1|	74.53	87.11	318	81	0	1	318	1	318	0	517	hypothetical protein VR5_125 [Enterobacteria phage vB_EcoM_VR5]
ORF169	gi|161622461|ref|YP_001595251.1|;gi|160213767|gb|ABX11106.1|	74.76	87.38	317	80	0	1	317	1	317	0	516	hypothetical protein EpJS98_gp122 [Enterobacteria phage JS98]
ORF169	gi|238695276|ref|YP_002922469.1|;gi|220029412|gb|ACL78346.1|	74.53	86.48	318	81	0	1	318	1	318	0	515	hypothetical protein EpJS10_0120 [Enterobacteria phage JS10]
ORF169	gi|729030725|gb|AIZ02478.1|	74.45	85.8	317	81	0	1	317	1	317	0	514	hypothetical protein VR25_134 [Enterobacteria phage vB_EcoM_VR25]
ORF169	gi|422934017|ref|YP_007004053.1|;gi|345450526|gb|AEN93729.1|	73.58	86.79	318	84	0	1	318	1	318	0	511	hypothetical protein EpBp7_0012 [Enterobacteria phage Bp7]
ORF170	gi|642905841|ref|YP_009037371.1|;gi|642903995|gb|AIA80015.1|	98.48	100	66	1	0	1	66	1	66	3e-43	137	hypothetical protein JS09_048 [Escherichia phage vB_EcoM_JS09]
ORF170	gi|398313643|emb|CCI88990.1|	98.48	98.48	66	1	0	1	66	1	66	9e-43	137	protein of unknown function [Yersinia phage phiD1]
ORF170	gi|161622522|ref|YP_001595382.1|;gi|160213828|gb|ABX11167.1|	35.59	57.63	59	37	1	7	65	13	70	0.0003	36.6	hypothetical protein EpJS98_gp253 [Enterobacteria phage JS98]
ORF170	gi|422934152|ref|YP_007004188.1|;gi|345450661|gb|AEN93864.1|	35.59	57.63	59	37	1	7	65	13	70	0.0003	36.2	hypothetical protein EpBp7_0147 [Enterobacteria phage Bp7]
ORF170	gi|299779201|ref|YP_003734395.1|;gi|298105930|gb|ADI55574.1|	35.59	57.63	59	37	1	7	65	19	76	0.0004	36.2	unnamed protein product [Enterobacteria phage IME08]
ORF170	gi|725950063|ref|YP_009100799.1|;gi|678223699|gb|AIM50839.1|	37.29	52.54	59	36	1	7	65	13	70	0.0007	35.4	hypothetical protein [Shigella phage Shf125875]
ORF170	gi|682124526|ref|YP_009056838.1|;gi|604671961|gb|AHV82955.1|	37.29	52.54	59	36	1	7	65	13	70	0.0009	35	hypothetical protein PhAPEC2_246 [Escherichia phage vB_EcoM_PhAPEC2]
ORF170	gi|642905981|ref|YP_009037512.1|;gi|642904135|gb|AIA80155.1|	37.29	52.54	59	36	1	7	65	13	70	0.001	35	hypothetical protein JS09_0189 [Escherichia phage vB_EcoM_JS09]
ORF170	gi|410492081|ref|YP_006907267.1|;gi|407437670|gb|AFU20430.1|	37.29	52.54	59	36	1	7	65	13	70	0.002	34.7	hypothetical protein HX01_0187 [Enterobacteria phage HX01]
ORF170	gi|729030292|gb|AIZ02047.1|	41.18	64.71	34	20	0	7	40	13	46	0.002	33.9	hypothetical protein VR5_260 [Enterobacteria phage vB_EcoM_VR5]
ORF171	gi|725949933|ref|YP_009100669.1|;gi|678223569|gb|AIM50709.1|	98.02	98.02	101	2	0	1	101	1	101	2e-68	204	hypothetical protein [Shigella phage Shf125875]
ORF171	gi|32453617|ref|NP_861823.1|;gi|32350436|gb|AAP76035.1|	97.03	97.03	101	3	0	1	101	1	101	7e-67	201	RB69ORF133c hypothetical protein [Enterobacteria phage RB69]
ORF171	gi|730985162|ref|YP_009111247.1|;gi|670141305|gb|AII27716.1|	96.04	96.04	101	4	0	1	101	1	101	8e-67	200	hypothetical protein Av05_00173 [Escherichia phage Av-05]
ORF171	gi|682124400|ref|YP_009056712.1|;gi|604671835|gb|AHV82829.1|	92.08	94.06	101	8	0	1	101	1	101	3e-63	191	hypothetical protein PhAPEC2_120 [Escherichia phage vB_EcoM_PhAPEC2]
ORF171	gi|642905842|ref|YP_009037372.1|;gi|642903996|gb|AIA80016.1|	92.08	93.07	101	8	0	1	101	1	101	5e-63	191	hypothetical protein JS09_049 [Escherichia phage vB_EcoM_JS09]
ORF171	gi|764446233|ref|WP_044369443.1|;gi|589889862|ref|YP_009005398.1|;gi|583927775|gb|AHI61037.1|	31.94	47.22	72	41	4	35	101	44	112	2.2	28.1	hypothetical protein PG7_134 [Enterobacter phage PG7]
ORF171	gi|530546246|ref|YP_008409840.1|;gi|530546343|ref|YP_008409935.1|;gi|529678767|gb|AGT12750.1|;gi|529680300|gb|AGT13928.1|	34.29	51.43	35	23	0	65	99	100	134	3.4	27.7	hypothetical protein PHELEMICH_14 [Mycobacterium phage Phelemich]
ORF171	gi|593775511|ref|YP_009013372.1|;gi|354997594|gb|AER48928.1|	34.21	50	38	24	1	60	96	94	131	5.6	27.3	gp14 [Mycobacterium phage Acadian]
ORF171	gi|764446229|ref|WP_044369440.1|;gi|589889861|ref|YP_009005397.1|;gi|583927774|gb|AHI61036.1|	38.71	54.84	31	19	0	71	101	81	111	6.1	26.6	hypothetical protein PG7_133 [Enterobacter phage PG7]
ORF171	gi|311993129|ref|YP_004009995.1|;gi|284177967|gb|ADB81633.1|	38.71	54.84	31	19	0	71	101	81	111	7.8	26.6	hypothetical protein CC31p137 [Enterobacteria phage CC31]
ORF172	gi|32453616|ref|NP_861822.1|;gi|32350435|gb|AAP76034.1|	99.56	99.56	228	1	0	1	228	1	228	4e-171	475	RB69ORF132c hypothetical protein [Enterobacteria phage RB69]
ORF172	gi|730985163|ref|YP_009111248.1|;gi|670141306|gb|AII27717.1|	96.93	98.68	228	7	0	1	228	1	228	9e-167	464	hypothetical protein Av05_00174 [Escherichia phage Av-05]
ORF172	gi|642905843|ref|YP_009037373.1|;gi|642903997|gb|AIA80017.1|	93.86	95.61	228	14	0	1	228	1	228	2e-162	453	hypothetical protein JS09_050 [Escherichia phage vB_EcoM_JS09]
ORF172	gi|725949932|ref|YP_009100668.1|;gi|678223568|gb|AIM50708.1|	94.3	96.93	228	13	0	1	228	1	228	3e-162	453	hypothetical protein [Shigella phage Shf125875]
ORF172	gi|682124399|ref|YP_009056711.1|;gi|604671834|gb|AHV82828.1|	93.42	95.18	228	15	0	1	228	1	228	1e-160	449	hypothetical protein PhAPEC2_119 [Escherichia phage vB_EcoM_PhAPEC2]
ORF172	gi|729030431|gb|AIZ02185.1|	89.91	95.18	228	23	0	1	228	1	228	7e-156	437	hypothetical protein VR20_127 [Enterobacteria phage vB_EcoM_VR20]
ORF172	gi|299779070|ref|YP_003734264.1|;gi|298105799|gb|ADI55443.1|	89.47	92.11	228	24	0	1	228	2	229	8e-154	432	unnamed protein product [Enterobacteria phage IME08]
ORF172	gi|238695274|ref|YP_002922467.1|;gi|220029410|gb|ACL78344.1|	88.6	91.67	228	26	0	1	228	1	228	3e-152	427	hypothetical protein EpJS10_0118 [Enterobacteria phage JS10]
ORF172	gi|161622459|ref|YP_001595249.1|;gi|160213765|gb|ABX11104.1|	88.6	91.23	228	26	0	1	228	1	228	4e-152	427	hypothetical protein EpJS98_gp120 [Enterobacteria phage JS98]
ORF172	gi|422934019|ref|YP_007004055.1|;gi|345450528|gb|AEN93731.1|	87.34	92.58	229	28	1	1	228	1	229	3e-150	422	hypothetical protein EpBp7_0014 [Enterobacteria phage Bp7]
ORF173	gi|730985164|ref|YP_009111249.1|;gi|670141307|gb|AII27718.1|	95.71	96.93	163	7	0	1	163	1	163	8e-99	286	putative membrane protein [Escherichia phage Av-05]
ORF173	gi|682124398|ref|YP_009056710.1|;gi|604671833|gb|AHV82827.1|	95.09	98.16	163	8	0	1	163	1	163	2e-98	286	hypothetical protein PhAPEC2_118 [Escherichia phage vB_EcoM_PhAPEC2]
ORF173	gi|725949931|ref|YP_009100667.1|;gi|678223567|gb|AIM50707.1|	95.09	96.93	163	8	0	1	163	1	163	3e-98	285	hypothetical protein [Shigella phage Shf125875]
ORF173	gi|32453615|ref|NP_861821.1|;gi|32350434|gb|AAP76033.1|	91.41	94.48	163	14	0	1	163	1	163	7e-91	266	e.2 conserved hypothetical, predicted membrane protein [Enterobacteria phage RB69]
ORF173	gi|642905844|ref|YP_009037374.1|;gi|642903998|gb|AIA80018.1|	93.87	96.93	163	10	0	1	163	1	163	1e-90	266	putative membrane protein [Escherichia phage vB_EcoM_JS09]
ORF173	gi|308814480|ref|YP_003934754.1|;gi|308206072|gb|ADO19471.1|	32.58	50.56	178	89	9	1	161	31	194	1e-16	75.9	predicted membrane protein [Shigella phage SP18]
ORF173	gi|314121695|ref|YP_004063814.1|;gi|313151452|gb|ADR32508.1|	27.27	46.59	176	101	6	1	161	1	164	8e-14	67.4	e.2 conserved hypothetical predicted membrane protein [Enterobacteria phage vB_EcoM-VR7]
ORF173	gi|729031012|gb|AIZ02764.1|	28.65	46.63	178	96	6	1	161	28	191	7e-12	62	hypothetical protein VR26_127 [Enterobacteria phage vB_EcoM_VR26]
ORF173	gi|161622458|ref|YP_001595248.1|;gi|160213764|gb|ABX11103.1|	30.06	46.82	173	100	6	1	161	1	164	5e-10	56.2	e.2 conserved hypothetical predicted membrane protein [Enterobacteria phage JS98]
ORF173	gi|729030723|gb|AIZ02476.1|	28.07	45.61	171	104	5	1	160	32	194	1e-09	55.8	hypothetical protein VR25_132 [Enterobacteria phage vB_EcoM_VR25]
ORF174	gi|725949930|ref|YP_009100666.1|;gi|730985165|ref|YP_009111250.1|;gi|670141308|gb|AII27719.1|;gi|678223566|gb|AIM50706.1|	100	100	78	0	0	1	78	1	78	2e-49	154	hypothetical protein [Shigella phage Shf125875]
ORF174	gi|682124397|ref|YP_009056709.1|;gi|604671832|gb|AHV82826.1|	97.44	98.72	78	2	0	1	78	1	78	1e-47	150	hypothetical protein PhAPEC2_117 [Escherichia phage vB_EcoM_PhAPEC2]
ORF174	gi|642905845|ref|YP_009037375.1|;gi|642903999|gb|AIA80019.1|	94.87	97.44	78	4	0	1	78	1	78	4e-46	146	hypothetical protein JS09_052 [Escherichia phage vB_EcoM_JS09]
ORF174	gi|32453614|ref|NP_861820.1|;gi|32350433|gb|AAP76032.1|	89.74	94.87	78	8	0	1	78	1	78	9e-37	122	RB69ORF130c hypothetical protein [Enterobacteria phage RB69]
ORF174	gi|729030722|gb|AIZ02475.1|	71.79	83.33	78	22	0	1	78	1	78	3e-33	113	hypothetical protein VR25_131 [Enterobacteria phage vB_EcoM_VR25]
ORF174	gi|422934021|ref|YP_007004057.1|;gi|345450530|gb|AEN93733.1|	67.95	80.77	78	25	0	1	78	1	78	2e-32	111	hypothetical protein EpBp7_0016 [Enterobacteria phage Bp7]
ORF174	gi|729030429|gb|AIZ02183.1|	69.23	82.05	78	24	0	1	78	1	78	3e-31	108	hypothetical protein VR20_125 [Enterobacteria phage vB_EcoM_VR20]
ORF174	gi|308814479|ref|YP_003934753.1|;gi|308206071|gb|ADO19470.1|	69.23	80.77	78	24	0	1	78	1	78	8e-31	107	hypothetical protein SP18_gp128 [Shigella phage SP18]
ORF174	gi|238695272|ref|YP_002922465.1|;gi|220029408|gb|ACL78342.1|	66.67	80.77	78	26	0	1	78	1	78	2e-29	103	hypothetical protein EpJS10_0116 [Enterobacteria phage JS10]
ORF174	gi|299779068|ref|YP_003734262.1|;gi|298105797|gb|ADI55441.1|	65.38	80.77	78	27	0	1	78	1	78	3e-29	103	unnamed protein product [Enterobacteria phage IME08]
ORF175	gi|32453613|ref|NP_861819.1|;gi|32350432|gb|AAP76031.1|	100	100	152	0	0	1	152	1	152	2e-112	320	NudE nudix hydrolase [Enterobacteria phage RB69]
ORF175	gi|725949929|ref|YP_009100665.1|;gi|678223565|gb|AIM50705.1|;gi|815007383|gb|AKE45160.1|;gi|815008112|gb|AKE45886.1|	98.68	99.34	152	2	0	1	152	1	152	2e-111	318	nudix hydrolase [Shigella phage Shf125875]
ORF175	gi|682124396|ref|YP_009056708.1|;gi|604671831|gb|AHV82825.1|	98.03	100	152	3	0	1	152	1	152	2e-111	318	nudix hydrolase [Escherichia phage vB_EcoM_PhAPEC2]
ORF175	gi|642905846|ref|YP_009037376.1|;gi|642904000|gb|AIA80020.1|	98.03	99.34	152	3	0	1	152	1	152	1e-110	316	nudix hydrolase [Escherichia phage vB_EcoM_JS09]
ORF175	gi|730985166|ref|YP_009111251.1|;gi|670141309|gb|AII27720.1|	97.37	99.34	152	4	0	1	152	1	152	2e-110	315	nudix hydrolase [Escherichia phage Av-05]
ORF175	gi|314121693|ref|YP_004063812.1|;gi|313151450|gb|ADR32506.1|	83.55	90.79	152	25	0	1	152	1	152	6e-94	273	NudE nudix hydrolase [Enterobacteria phage vB_EcoM-VR7]
ORF175	gi|729031010|gb|AIZ02762.1|	83.44	90.73	151	25	0	2	152	1	151	1e-92	270	nudix hydrolase [Enterobacteria phage vB_EcoM_VR26]
ORF175	gi|729030721|gb|AIZ02474.1|	82.12	90.73	151	27	0	2	152	1	151	9e-92	268	nudix hydrolase [Enterobacteria phage vB_EcoM_VR25]
ORF175	gi|308814478|ref|YP_003934752.1|;gi|308206070|gb|ADO19469.1|	82.78	90.07	151	26	0	2	152	1	151	1e-91	267	nudix hydrolase [Shigella phage SP18]
ORF175	gi|729030428|gb|AIZ02182.1|	82.12	89.4	151	25	1	2	152	1	149	2e-89	261	nudix hydrolase [Enterobacteria phage vB_EcoM_VR20]
ORF176	gi|642905847|ref|YP_009037377.1|;gi|730985167|ref|YP_009111252.1|;gi|642904001|gb|AIA80021.1|;gi|670141310|gb|AII27721.1|;gi|815007384|gb|AKE45161.1|;gi|815008111|gb|AKE45885.1|;gi|815009109|gb|AKE46876.1|	100	100	162	0	0	1	162	1	162	3e-118	336	e lysozyme murein hydrolase [Escherichia phage vB_EcoM_JS09]
ORF176	gi|682124395|ref|YP_009056707.1|;gi|604671830|gb|AHV82824.1|	98.77	100	162	2	0	1	162	1	162	2e-117	333	T4-like lysozyme [Escherichia phage vB_EcoM_PhAPEC2]
ORF176	gi|725949928|ref|YP_009100664.1|;gi|678223564|gb|AIM50704.1|	100	100	157	0	0	6	162	1	157	5e-114	325	endolysin [Shigella phage Shf125875]
ORF176	gi|32453612|ref|NP_861818.1|;gi|32350431|gb|AAP76030.1|	99.36	100	157	1	0	6	162	1	157	1e-113	324	e Lysozyme murein hydrolase [Enterobacteria phage RB69]
ORF176	gi|422934544|ref|YP_007004505.1|;gi|339791327|gb|AEK12384.1|	87.65	93.83	162	20	0	1	162	1	162	4e-104	300	phage baseplate hub [Enterobacteria phage ime09]
ORF176	gi|116326346|ref|YP_803066.1|;gi|228861061|ref|YP_002854084.1|;gi|414086489|ref|YP_006986678.1|;gi|422934910|ref|YP_007004870.1|;gi|639438776|ref|YP_009030733.1|;gi|712914961|ref|YP_009102598.1|;gi|730984854|ref|YP_009110947.1|;gi|115343939|gb|ABI94948.1|;gi|227438735|gb|ACP31047.1|;gi|291290340|dbj|BAI83135.1|;gi|343177464|gb|AEM00790.1|;gi|383396270|gb|AFH20086.1|;gi|397134142|gb|AFO10649.1|;gi…	83.85	92.55	161	26	0	1	161	1	161	2e-99	288	soluble lysozyme [Enterobacteria phage RB32]
ORF176	gi|713322717|ref|YP_009102332.1|;gi|698042169|gb|AIT74494.1|	83.85	92.55	161	26	0	1	161	1	161	3e-99	288	lysozyme murein hydrolase [Enterobacteria phage RB27]
ORF176	gi|228861442|ref|YP_002854463.1|;gi|227438458|gb|ACP30771.1|	83.85	91.93	161	26	0	1	161	1	161	7e-99	287	soluble lysozyme [Enterobacteria phage RB14]
ORF176	gi|157831701|pdb|1L45|A	83.23	91.3	161	27	0	1	161	1	161	2e-98	285	Chain A, Cumulative Site-Directed Charge-Change Replacements In Bacteriophage T4 Lysozyme Suggest That Long-Range Electrostatic Interactions Contribute Little To Protein Stability [Enterobacteria phage T4]
ORF176	gi|713322429|ref|YP_009098513.1|;gi|698040532|gb|AIT72863.1|;gi|698040805|gb|AIT73135.1|;gi|698041077|gb|AIT73406.1|;gi|698041349|gb|AIT73677.1|;gi|698041622|gb|AIT73949.1|;gi|698041896|gb|AIT74222.1|	82.61	91.93	161	28	0	1	161	1	161	2e-98	285	lysozyme murein hydrolase [Enterobacteria phage RB3]
ORF177	gi|725949927|ref|YP_009100663.1|;gi|678223563|gb|AIM50703.1|	100	100	93	0	0	1	93	1	93	4e-60	183	hypothetical protein [Shigella phage Shf125875]
ORF177	gi|422934543|ref|YP_007004504.1|;gi|642905848|ref|YP_009037378.1|;gi|730985168|ref|YP_009111253.1|;gi|339791326|gb|AEK12383.1|;gi|642904002|gb|AIA80022.1|;gi|670141311|gb|AII27722.1|;gi|815007385|gb|AKE45162.1|;gi|815008110|gb|AKE45884.1|;gi|815009108|gb|AKE46875.1|	98.92	98.92	93	1	0	1	93	1	93	1e-59	181	hypothetical protein [Enterobacteria phage ime09]
ORF177	gi|682124394|ref|YP_009056706.1|;gi|604671829|gb|AHV82823.1|	97.85	98.92	93	2	0	1	93	1	93	1e-58	179	hypothetical protein PhAPEC2_114 [Escherichia phage vB_EcoM_PhAPEC2]
ORF177	gi|729030426|gb|AIZ02180.1|	89.25	93.55	93	10	0	1	93	1	93	5e-54	167	putative internal head protein [Enterobacteria phage vB_EcoM_VR20]
ORF177	gi|32453611|ref|NP_861817.1|;gi|32350430|gb|AAP76029.1|	91.4	91.4	93	8	0	1	93	1	93	1e-53	166	RB69ORF127c hypothetical protein [Enterobacteria phage RB69]
ORF177	gi|729030719|gb|AIZ02472.1|	88.17	92.47	93	11	0	1	93	1	93	3e-53	165	putative internal head protein [Enterobacteria phage vB_EcoM_VR25]
ORF177	gi|228861076|ref|YP_002854099.1|;gi|422934924|ref|YP_007004884.1|;gi|227438750|gb|ACP31062.1|;gi|343177478|gb|AEM00804.1|;gi|698043283|gb|AIT75604.1|;gi|815008382|gb|AKE46155.1|	51.19	66.67	84	39	1	1	84	1	82	5e-20	80.1	Ip5 hypothetical protein [Enterobacteria phage RB51]
ORF177	gi|116326363|ref|YP_803083.1|;gi|228861456|ref|YP_002854477.1|;gi|330858661|ref|YP_004415036.1|;gi|414086505|ref|YP_006986694.1|;gi|422934559|ref|YP_007004520.1|;gi|639438792|ref|YP_009030749.1|;gi|713322442|ref|YP_009098526.1|;gi|730984868|ref|YP_009110961.1|;gi|535206|emb|CAA84462.1|;gi|535216|emb|CAA84457.1|;gi|115343956|gb|ABI94965.1|;gi|227438472|gb|ACP30785.1|;gi|291290359|dbj|BAI83154.1|;g…	47.62	65.48	84	42	1	1	84	1	82	6e-18	74.7	hypothetical protein RB32ORF141c [Enterobacteria phage RB32]
ORF177	gi|535211|emb|CAA84461.1|	48.81	64.29	84	38	1	1	84	1	79	1e-17	73.9	Ip5 [Enterobacteria phage RB70]
ORF177	gi|729031035|gb|AIZ02787.1|	48.81	60.71	84	36	2	1	84	1	77	2e-16	70.9	putative internal head protein [Enterobacteria phage vB_EcoM_VR26]
ORF178	gi|730985169|ref|YP_009111254.1|;gi|670141312|gb|AII27723.1|	99.27	100	137	1	0	1	137	1	137	1e-98	284	DenV endonuclease [Escherichia phage Av-05]
ORF178	gi|682124393|ref|YP_009056705.1|;gi|604671828|gb|AHV82822.1|	98.54	99.27	137	2	0	1	137	1	137	4e-98	283	endonuclease V, N-glycosylase UV repair enzyme [Escherichia phage vB_EcoM_PhAPEC2]
ORF178	gi|32453610|ref|NP_861816.1|;gi|32350429|gb|AAP76028.1|	98.54	99.27	137	2	0	1	137	1	137	4e-98	283	DenV endonuclease V, N-glycosylase UV repair enzyme [Enterobacteria phage RB69]
ORF178	gi|725949926|ref|YP_009100662.1|;gi|678223562|gb|AIM50702.1|	97.08	98.54	137	4	0	1	137	1	137	4e-97	280	bifunctional N-glycosylase and DNA endonuclease [Shigella phage Shf125875]
ORF178	gi|642905849|ref|YP_009037379.1|;gi|642904003|gb|AIA80023.1|	97.81	98.54	137	3	0	1	137	1	137	8e-97	279	endonuclease V N-glycosylase UV repair enzyme [Escherichia phage vB_EcoM_JS09]
ORF178	gi|161622452|ref|YP_001595242.1|;gi|238695267|ref|YP_002922460.1|;gi|160213758|gb|ABX11097.1|;gi|220029403|gb|ACL78337.1|	91.97	95.62	137	11	0	1	137	1	137	7e-91	265	DenV endonuclease V N-glycosylase UV repair enzyme [Enterobacteria phage JS98]
ORF178	gi|9632732|ref|NP_049733.1|;gi|119330|sp|P04418.1|END5_BPT4;gi|157834933|pdb|2END|A;gi|5354356|gb|AAD42563.1|AF158101_150;gi|15268|emb|CAA28215.1|;gi|209420|gb|AAC42096.1|;gi|533269|gb|AAA72721.1|;gi|299780478|gb|ADJ39840.1|;gi|628971866|gb|AHY83587.1|;gi|628972060|gb|AHY83780.1|;gi|628972252|gb|AHY83971.1|;gi|698042711|gb|AIT75034.1|;gi|698042985|gb|AIT75307.1|	91.24	94.89	137	12	0	1	137	1	137	1e-90	264	DenV endonuclease V, N-glycosylase UV repair enzyme [Enterobacteria phage T4]
ORF178	gi|157830975|pdb|1ENJ|A	90.51	94.89	137	13	0	1	137	1	137	3e-90	263	Chain A, Crystal Structure Of A Pyrimidine Dimer Specific Excision Repair Enzyme From Bacteriophage T4: Refinement At 1.45 Angstroms And X-Ray Analysis Of The Three Active Site Mutants [Enterobacteria phage T4]
ORF178	gi|157830976|pdb|1ENK|A	90.51	94.89	137	13	0	1	137	1	137	4e-90	263	Chain A, Crystal Structure Of A Pyrimidine Dimer Specific Excision Repair Enzyme From Bacteriophage T4: Refinement At 1.45 Angstroms And X-Ray Analysis Of The Three Active Site Mutants [Enterobacteria phage T4]
ORF178	gi|157830974|pdb|1ENI|A	90.51	94.89	137	13	0	1	137	1	137	4e-90	262	Chain A, Crystal Structure Of A Pyrimidine Dimer Specific Excision Repair Enzyme From Bacteriophage T4: Refinement At 1.45 Angstroms And X-Ray Analysis Of The Three Active Site Mutants [Enterobacteria phage T4]
ORF179	gi|32453609|ref|NP_861815.1|;gi|32350428|gb|AAP76027.1|	97.62	98.81	84	2	0	1	84	3	86	1e-52	163	RB69ORF125c hypothetical protein [Enterobacteria phage RB69]
ORF179	gi|725949925|ref|YP_009100661.1|;gi|678223561|gb|AIM50701.1|	96.43	97.62	84	3	0	1	84	3	86	2e-51	160	hypothetical protein [Shigella phage Shf125875]
ORF179	gi|730985170|ref|YP_009111255.1|;gi|670141313|gb|AII27724.1|	95.24	95.24	84	4	0	1	84	1	84	2e-51	160	hypothetical protein Av05_00181 [Escherichia phage Av-05]
ORF179	gi|729030716|gb|AIZ02469.1|	72.09	79.07	86	21	2	1	84	3	87	9e-35	117	hypothetical protein VR25_125 [Enterobacteria phage vB_EcoM_VR25]
ORF179	gi|314121689|ref|YP_004063808.1|;gi|313151446|gb|ADR32502.1|;gi|729030423|gb|AIZ02177.1|	72.09	79.07	86	21	2	1	84	3	87	1e-34	117	hypothetical protein VR7_gp127 [Enterobacteria phage vB_EcoM-VR7]
ORF179	gi|308814474|ref|YP_003934748.1|;gi|308206066|gb|ADO19465.1|	70.59	77.65	85	24	1	1	84	3	87	3e-34	116	hypothetical protein SP18_gp123 [Shigella phage SP18]
ORF179	gi|764161913|ref|YP_009126323.1|;gi|586881550|gb|AHJ86970.1|	69.41	75.29	85	25	1	1	84	3	87	9e-30	105	hypothetical protein D26_00189 [Salmonella phage STP4-a]
ORF179	gi|456351205|ref|YP_007501157.1|;gi|448913677|gb|AGE48182.1|	68.24	75.29	85	26	1	1	84	3	87	1e-29	104	hypothetical protein [Salmonella phage S16]
ORF179	gi|408387057|gb|AFU64066.1|	64.29	73.81	84	29	1	1	83	3	86	2e-27	99.4	hypothetical protein [Salmonella phage STML-198]
ORF179	gi|456351220|ref|YP_007501172.1|;gi|347466295|gb|AEO97081.1|	44.26	65.57	61	33	1	23	83	43	102	8e-10	53.1	hypothetical protein [Salmonella phage S16]
ORF180	gi|642905851|ref|YP_009037381.1|;gi|642904005|gb|AIA80025.1|	100	100	104	0	0	1	104	1	104	2e-72	215	hypothetical protein JS09_058 [Escherichia phage vB_EcoM_JS09]
ORF180	gi|535219|emb|CAA84455.1|	94.85	96.91	97	4	1	1	96	1	97	8e-62	188	Ip10 [Enterobacteria phage Pol]
ORF180	gi|32453608|ref|NP_861814.1|;gi|32350427|gb|AAP76026.1|	95.35	97.67	86	4	0	1	86	1	86	2e-55	171	RB69ORF124c hypothetical protein [Enterobacteria phage RB69]
ORF180	gi|314121690|ref|YP_004063809.1|;gi|313151447|gb|ADR32503.1|;gi|729030717|gb|AIZ02470.1|;gi|729031007|gb|AIZ02759.1|	72.82	85.44	103	28	0	1	103	1	103	3e-52	163	putative internal head protein Ip10 [Enterobacteria phage vB_EcoM-VR7]
ORF180	gi|308814475|ref|YP_003934749.1|;gi|308206067|gb|ADO19466.1|	72.12	85.58	104	29	0	1	104	5	108	5e-52	163	Ip10 [Shigella phage SP18]
ORF180	gi|729030424|gb|AIZ02178.1|	71.84	85.44	103	29	0	1	103	1	103	2e-51	162	putative internal head protein [Enterobacteria phage vB_EcoM_VR20]
ORF180	gi|311993121|ref|YP_004009987.1|;gi|284177959|gb|ADB81625.1|	53	71	100	43	3	1	98	1	98	4e-28	102	hypothetical protein CC31p129 [Enterobacteria phage CC31]
ORF180	gi|764446210|ref|WP_044369428.1|;gi|589889855|ref|YP_009005391.1|;gi|583927768|gb|AHI61030.1|	54	71	100	42	3	1	98	1	98	7e-28	101	hypothetical protein PG7_127 [Enterobacter phage PG7]
ORF180	gi|712914975|ref|YP_009102612.1|;gi|397134156|gb|AFO10663.1|	66.67	85.71	21	7	0	1	21	1	21	0.11	30.8	hypothetical protein ECML134_137 [Escherichia phage ECML-134]
ORF180	gi|414086504|ref|YP_006986693.1|;gi|383396285|gb|AFH20101.1|	70.59	94.12	17	5	0	1	17	1	17	0.47	29.3	hypothetical protein ACG-C40_0137 [Enterobacteria phage vB_EcoM_ACG-C40]
ORF181	gi|730985172|ref|YP_009111257.1|;gi|670141315|gb|AII27726.1|	98.17	98.17	109	2	0	1	109	1	109	1e-72	216	hypothetical protein Av05_00183 [Escherichia phage Av-05]
ORF181	gi|32453607|ref|NP_861813.1|;gi|32350426|gb|AAP76025.1|	98.17	98.17	109	2	0	1	109	1	109	1e-72	216	RB69ORF123c hypothetical protein [Enterobacteria phage RB69]
ORF181	gi|642905852|ref|YP_009037382.1|;gi|725949924|ref|YP_009100660.1|;gi|642904006|gb|AIA80026.1|;gi|678223560|gb|AIM50700.1|	80	86.67	15	3	0	1	15	1	15	0.7	29.3	ipII protein [Escherichia phage vB_EcoM_JS09]
ORF181	gi|431809057|ref|YP_007235954.1|;gi|398313346|emb|CCI88695.1|	41.07	50	56	20	3	1	55	1	44	1.1	28.5	IpII internal head protein [Yersinia phage phiR1-RT]
ORF181	gi|311993232|ref|YP_004010098.1|;gi|284178070|gb|ADB81736.1|	37.29	45.76	59	27	3	37	88	84	139	1.6	28.9	dihydrofolate reductase [Enterobacteria phage CC31]
ORF181	gi|713322716|ref|YP_009102331.1|;gi|698042168|gb|AIT74493.1|	68.75	87.5	16	5	0	1	16	1	16	1.7	28.9	hypothetical protein RB27_126 [Enterobacteria phage RB27]
ORF181	gi|764161916|ref|YP_009126326.1|;gi|586881553|gb|AHJ86973.1|	56.52	69.57	23	10	0	1	23	1	23	3.5	27.7	hypothetical protein D26_00192 [Salmonella phage STP4-a]
ORF181	gi|535231|emb|CAA84451.1|	41.86	55.81	43	20	2	1	41	1	40	3.6	27.7	Ip4 [Enterobacteria phage K3]
ORF181	gi|729030173|gb|AIZ01928.1|	60	70	20	8	0	1	20	1	20	4.2	26.9	putative internal head protein [Enterobacteria phage vB_EcoM_VR5]
ORF181	gi|331028138|ref|YP_004421852.1|;gi|301341601|gb|ADK73485.1|	36.36	56.82	44	27	1	20	62	674	717	4.3	28.1	gene transfer agent [Roseobacter phage RDJL Phi 1]
ORF182	gi|682124390|ref|YP_009056702.1|;gi|604671825|gb|AHV82819.1|	98.32	98.88	179	3	0	1	179	1	179	3e-131	370	hypothetical protein PhAPEC2_110 [Escherichia phage vB_EcoM_PhAPEC2]
ORF182	gi|725949923|ref|YP_009100659.1|;gi|678223559|gb|AIM50699.1|	97.77	98.32	179	4	0	1	179	1	179	9e-131	369	hypothetical protein [Shigella phage Shf125875]
ORF182	gi|642905854|ref|YP_009037384.1|;gi|642904008|gb|AIA80028.1|	96.65	97.77	179	6	0	1	179	1	179	3e-129	365	hypothetical protein JS09_061 [Escherichia phage vB_EcoM_JS09]
ORF182	gi|730985173|ref|YP_009111258.1|;gi|670141316|gb|AII27727.1|	96.65	97.77	179	6	0	1	179	1	179	4e-129	365	hypothetical protein Av05_00184 [Escherichia phage Av-05]
ORF182	gi|32453606|ref|NP_861812.1|;gi|32350425|gb|AAP76024.1|	98.2	99.4	167	3	0	13	179	1	167	3e-121	345	Vs.8 conserved hypothetical protein [Enterobacteria phage RB69]
ORF182	gi|228861058|ref|YP_002854081.1|;gi|227438732|gb|ACP31044.1|;gi|698043265|gb|AIT75586.1|	91.11	93.89	180	15	1	1	179	1	180	3e-120	342	vs.8 hypothetical protein [Enterobacteria phage RB51]
ORF182	gi|730984851|ref|YP_009110944.1|;gi|694817564|gb|AIS73446.1|	89.39	95.53	179	19	0	1	179	1	179	7e-120	341	hypothetical protein pSs1_00136 [Shigella phage pSs-1]
ORF182	gi|587757238|gb|AHK10971.1|	88.83	95.53	179	20	0	1	179	17	195	2e-119	341	endoribonuclease RegB domain-containing protein [Escherichia phage HY01]
ORF182	gi|15272|emb|CAA28219.1|	89.94	94.97	179	18	0	1	179	1	179	2e-119	340	unnamed protein product [Enterobacteria phage T4]
ORF182	gi|291290338|dbj|BAI83133.1|	89.39	96.09	179	19	0	1	179	17	195	2e-119	341	conserved hypothetical protein [Enterobacteria phage AR1]
ORF183	gi|32453605|ref|NP_861811.1|;gi|32350424|gb|AAP76023.1|	100	100	102	0	0	1	102	1	102	6e-73	216	Vs.7 conserved hypothetical protein [Enterobacteria phage RB69]
ORF183	gi|725949922|ref|YP_009100658.1|;gi|678223558|gb|AIM50698.1|	99.02	99.02	102	1	0	1	102	1	102	3e-72	214	hypothetical protein [Shigella phage Shf125875]
ORF183	gi|682124389|ref|YP_009056701.1|;gi|604671824|gb|AHV82818.1|	98.04	100	102	2	0	1	102	1	102	3e-72	214	hypothetical protein PhAPEC2_109 [Escherichia phage vB_EcoM_PhAPEC2]
ORF183	gi|730985174|ref|YP_009111259.1|;gi|670141317|gb|AII27728.1|	100	100	101	0	0	2	102	1	101	3e-72	214	hypothetical protein Av05_00185 [Escherichia phage Av-05]
ORF183	gi|642905855|ref|YP_009037385.1|;gi|642904009|gb|AIA80029.1|	98.04	98.04	102	2	0	1	102	1	102	4e-70	209	hypothetical protein JS09_062 [Escherichia phage vB_EcoM_JS09]
ORF183	gi|9632846|ref|NP_049731.1|;gi|731222|sp|P13317.2|Y06J_BPT4;gi|5354470|gb|AAD42677.1|AF158101_264;gi|15275|emb|CAA28222.1|;gi|299780476|gb|ADJ39838.1|;gi|628971885|gb|AHY83606.1|;gi|628972078|gb|AHY83798.1|;gi|628972271|gb|AHY83990.1|;gi|698042709|gb|AIT75032.1|;gi|698042983|gb|AIT75305.1|	63.3	75.23	109	33	1	1	102	1	109	4e-42	138	Vs.7 conserved hypothetical protein [Enterobacteria phage T4]
ORF183	gi|116326343|ref|YP_803063.1|;gi|414086486|ref|YP_006986675.1|;gi|712914957|ref|YP_009102594.1|;gi|115343936|gb|ABI94945.1|;gi|383396267|gb|AFH20083.1|;gi|397134138|gb|AFO10645.1|;gi|698042437|gb|AIT74761.1|	63.3	75.23	109	33	1	1	102	1	109	4e-42	138	hypothetical protein RB32ORF121c [Enterobacteria phage RB32]
ORF183	gi|422934539|ref|YP_007004500.1|;gi|730984850|ref|YP_009110943.1|;gi|339791322|gb|AEK12379.1|;gi|587757237|gb|AHK10970.1|;gi|694817563|gb|AIS73445.1|	63.3	75.23	109	33	1	1	102	1	109	4e-42	138	conserved hypothetical protein [Enterobacteria phage ime09]
ORF183	gi|525334389|gb|AGR46071.1|	63.3	75.23	109	33	1	1	102	1	109	4e-42	138	hypothetical protein [Yersinia phage PST]
ORF183	gi|291290337|dbj|BAI83132.1|	63.3	75.23	109	33	1	1	102	18	126	6e-42	138	conserved hypothetical protein [Enterobacteria phage AR1]
ORF184	gi|682124388|ref|YP_009056700.1|;gi|604671823|gb|AHV82817.1|	98.33	98.33	120	2	0	1	120	1	120	9e-83	242	hypothetical protein PhAPEC2_108 [Escherichia phage vB_EcoM_PhAPEC2]
ORF184	gi|730985175|ref|YP_009111260.1|;gi|670141318|gb|AII27729.1|	98.33	99.17	120	2	0	1	120	1	120	1e-82	242	hypothetical protein Av05_00186 [Escherichia phage Av-05]
ORF184	gi|725949921|ref|YP_009100657.1|;gi|678223557|gb|AIM50697.1|	97.5	98.33	120	3	0	1	120	1	120	4e-82	241	hypothetical protein [Shigella phage Shf125875]
ORF184	gi|642905856|ref|YP_009037386.1|;gi|642904010|gb|AIA80030.1|;gi|815007390|gb|AKE45167.1|;gi|815008105|gb|AKE45879.1|;gi|815009104|gb|AKE46871.1|	97.5	98.33	120	3	0	1	120	1	120	5e-82	241	hypothetical protein JS09_063 [Escherichia phage vB_EcoM_JS09]
ORF184	gi|32453604|ref|NP_861810.1|;gi|32350423|gb|AAP76022.1|	95.83	98.33	120	5	0	1	120	1	120	3e-81	239	Vs.6 conserved hypothetical protein [Enterobacteria phage RB69]
ORF184	gi|730984849|ref|YP_009110942.1|;gi|694817562|gb|AIS73444.1|	95	95.83	120	6	0	1	120	1	120	6e-80	235	hypothetical protein pSs1_00134 [Shigella phage pSs-1]
ORF184	gi|414086485|ref|YP_006986674.1|;gi|291290336|dbj|BAI83131.1|;gi|383396266|gb|AFH20082.1|;gi|525334388|gb|AGR46070.1|	95	95.83	120	6	0	1	120	1	120	1e-79	234	hypothetical protein ACG-C40_0120 [Enterobacteria phage vB_EcoM_ACG-C40]
ORF184	gi|228861056|ref|YP_002854079.1|;gi|422934905|ref|YP_007004865.1|;gi|713322425|ref|YP_009098509.1|;gi|227438730|gb|ACP31042.1|;gi|343177459|gb|AEM00785.1|;gi|587757236|gb|AHK10969.1|;gi|698040528|gb|AIT72859.1|;gi|698040801|gb|AIT73131.1|;gi|698041073|gb|AIT73402.1|;gi|698041345|gb|AIT73673.1|;gi|698041618|gb|AIT73945.1|;gi|698041892|gb|AIT74218.1|;gi|698043263|gb|AIT75584.1|;gi|815008363|gb|AKE4…	95	95.83	120	6	0	1	120	1	120	2e-79	234	vs.6 hypothetical protein [Enterobacteria phage RB51]
ORF184	gi|116326342|ref|YP_803062.1|;gi|639438772|ref|YP_009030729.1|;gi|712914956|ref|YP_009102593.1|;gi|713322713|ref|YP_009102328.1|;gi|115343935|gb|ABI94944.1|;gi|299780475|gb|ADJ39837.1|;gi|397134137|gb|AFO10644.1|;gi|398313670|emb|CCI89017.1|;gi|628971600|gb|AHY83322.1|;gi|698042165|gb|AIT74490.1|;gi|698042436|gb|AIT74760.1|;gi|698042982|gb|AIT75304.1|	95	95.83	120	6	0	1	120	1	120	3e-79	234	hypothetical protein RB32ORF120c [Enterobacteria phage RB32]
ORF184	gi|228861438|ref|YP_002854459.1|;gi|227438454|gb|ACP30767.1|	94.17	95	120	7	0	1	120	1	120	1e-78	232	vs.6 hypothetical protein [Enterobacteria phage RB14]
ORF185	gi|642905857|ref|YP_009037387.1|;gi|642904011|gb|AIA80031.1|	98.65	98.65	74	1	0	1	74	1	74	5e-49	153	hypothetical protein JS09_064 [Escherichia phage vB_EcoM_JS09]
ORF185	gi|725949920|ref|YP_009100656.1|;gi|678223556|gb|AIM50696.1|	98.65	98.65	74	1	0	1	74	1	74	1e-48	152	hypothetical protein [Shigella phage Shf125875]
ORF185	gi|32453603|ref|NP_861809.1|;gi|32350422|gb|AAP76021.1|;gi|815007391|gb|AKE45168.1|;gi|815008104|gb|AKE45878.1|;gi|815009103|gb|AKE46870.1|	97.3	97.3	74	2	0	1	74	1	74	4e-48	151	Vs.5 conserved hypothetical protein [Enterobacteria phage RB69]
ORF185	gi|730985176|ref|YP_009111261.1|;gi|670141319|gb|AII27730.1|	97.3	97.3	74	2	0	1	74	1	74	4e-48	150	hypothetical protein Av05_00187 [Escherichia phage Av-05]
ORF185	gi|682124387|ref|YP_009056699.1|;gi|604671822|gb|AHV82816.1|	93.24	94.59	74	5	0	1	74	1	74	4e-46	146	hypothetical protein PhAPEC2_107 [Escherichia phage vB_EcoM_PhAPEC2]
ORF185	gi|330858641|ref|YP_004415016.1|;gi|414086484|ref|YP_006986673.1|;gi|327397575|gb|AEA73077.1|;gi|383396265|gb|AFH20081.1|	70.83	81.94	72	21	0	1	72	1	72	5e-32	110	hypothetical protein Vs.5 [Shigella phage Shfl2]
ORF185	gi|525334387|gb|AGR46069.1|	70.83	83.33	72	21	0	1	72	1	72	1e-31	109	hypothetical protein [Yersinia phage PST]
ORF185	gi|587757235|gb|AHK10968.1|	69.44	81.94	72	22	0	1	72	1	72	2e-31	108	hypothetical protein HY01_0111 [Escherichia phage HY01]
ORF185	gi|713322712|ref|YP_009102327.1|;gi|698042164|gb|AIT74489.1|	69.44	83.33	72	22	0	1	72	1	72	4e-31	107	hypothetical protein RB27_122 [Enterobacteria phage RB27]
ORF185	gi|639438771|ref|YP_009030728.1|;gi|712914955|ref|YP_009102592.1|;gi|299780474|gb|ADJ39836.1|;gi|397134136|gb|AFO10643.1|;gi|628971599|gb|AHY83321.1|;gi|698042708|gb|AIT75031.1|;gi|698042981|gb|AIT75303.1|	70.83	81.94	72	21	0	1	72	1	72	4e-31	107	hypothetical protein e112_123 [Escherichia phage e11/2]
ORF186	gi|725949919|ref|YP_009100655.1|;gi|678223555|gb|AIM50695.1|	100	100	88	0	0	1	88	1	88	1e-59	181	hypothetical protein [Shigella phage Shf125875]
ORF186	gi|32453602|ref|NP_861808.1|;gi|642905858|ref|YP_009037388.1|;gi|32350421|gb|AAP76020.1|;gi|82173933|emb|CAH41998.1|;gi|82173936|emb|CAH42000.1|;gi|642904012|gb|AIA80032.1|	98.86	100	88	1	0	1	88	1	88	2e-59	181	Vs.4 conserved hypothetical protein [Enterobacteria phage RB69]
ORF186	gi|730985177|ref|YP_009111262.1|;gi|670141320|gb|AII27731.1|	97.73	98.86	88	2	0	1	88	1	88	2e-58	178	hypothetical protein Av05_00188 [Escherichia phage Av-05]
ORF186	gi|314121684|ref|YP_004063803.1|;gi|313151441|gb|ADR32497.1|;gi|729030711|gb|AIZ02464.1|	98.84	100	86	1	0	3	88	2	87	9e-58	176	Vs.4 conserved hypothetical protein [Enterobacteria phage vB_EcoM-VR7]
ORF186	gi|729030144|gb|AIZ01899.1|	97.67	98.84	86	2	0	3	88	2	87	4e-57	175	hypothetical protein VR5_112 [Enterobacteria phage vB_EcoM_VR5]
ORF186	gi|729031002|gb|AIZ02754.1|	97.67	98.84	86	2	0	3	88	2	87	1e-56	173	hypothetical protein VR26_117 [Enterobacteria phage vB_EcoM_VR26]
ORF186	gi|682124386|ref|YP_009056698.1|;gi|604671821|gb|AHV82815.1|	71.59	76.14	88	18	1	1	88	1	81	2e-37	124	hypothetical protein PhAPEC2_106 [Escherichia phage vB_EcoM_PhAPEC2]
ORF186	gi|448260350|ref|YP_007348448.1|;gi|408385222|gb|AFU62653.1|	62.92	76.4	89	32	1	1	88	1	89	3e-33	114	hypothetical protein phAPEC8_0080 [Escherichia phage phAPEC8]
ORF186	gi|116326340|ref|YP_803060.1|;gi|115343933|gb|ABI94942.1|;gi|698042434|gb|AIT74758.1|	66.67	77.01	87	28	1	3	88	2	88	1e-32	112	hypothetical protein RB32ORF118c [Enterobacteria phage RB32]
ORF186	gi|422934536|ref|YP_007004497.1|;gi|339791319|gb|AEK12376.1|	65.52	78.16	87	29	1	3	88	2	88	1e-32	112	conserved hypothetical protein [Enterobacteria phage ime09]
ORF187	gi|82173937|emb|CAH42001.1|	100	100	71	0	0	1	71	1	71	2e-47	149	gpvs.3 [Enterobacteria phage TuIa]
ORF187	gi|682124385|ref|YP_009056697.1|;gi|604671820|gb|AHV82814.1|	98.59	100	71	1	0	1	71	1	71	7e-47	147	hypothetical protein PhAPEC2_105 [Escherichia phage vB_EcoM_PhAPEC2]
ORF187	gi|82173934|emb|CAH41999.1|	98.59	100	71	1	0	1	71	1	71	9e-47	147	gpvs.3 [Enterobacteria phage RB69]
ORF187	gi|642905859|ref|YP_009037389.1|;gi|642904013|gb|AIA80033.1|	98.59	100	71	1	0	1	71	1	71	1e-46	147	hypothetical protein JS09_066 [Escherichia phage vB_EcoM_JS09]
ORF187	gi|730985178|ref|YP_009111263.1|;gi|670141321|gb|AII27732.1|	97.18	98.59	71	2	0	1	71	1	71	6e-46	145	hypothetical protein Av05_00189 [Escherichia phage Av-05]
ORF187	gi|32453601|ref|NP_861807.1|;gi|32350420|gb|AAP76019.1|	98.51	100	67	1	0	1	67	1	67	6e-43	137	RB69ORF117c hypothetical protein [Enterobacteria phage RB69]
ORF187	gi|729030417|gb|AIZ02171.1|	41.54	58.46	65	38	0	5	69	35	99	4e-08	47.8	hypothetical protein VR20_113 [Enterobacteria phage vB_EcoM_VR20]
ORF187	gi|308814468|ref|YP_003934742.1|;gi|308206060|gb|ADO19459.1|	40	58.46	65	39	0	5	69	35	99	6e-08	47.4	hypothetical protein SP18_gp117 [Shigella phage SP18]
ORF187	gi|729030143|gb|AIZ01898.1|	38.46	53.85	65	40	0	5	69	3	67	6e-07	44.3	hypothetical protein VR5_111 [Enterobacteria phage vB_EcoM_VR5]
ORF187	gi|228861435|ref|YP_002854456.1|;gi|422934535|ref|YP_007004496.1|;gi|227438451|gb|ACP30764.1|;gi|291290333|dbj|BAI83128.1|;gi|339791318|gb|AEK12375.1|;gi|398313667|emb|CCI89014.1|	41.54	53.85	65	38	0	5	69	26	90	7e-07	44.3	vs.3 hypothetical protein [Enterobacteria phage RB14]
ORF188	gi|642905860|ref|YP_009037390.1|;gi|725949917|ref|YP_009100653.1|;gi|642904014|gb|AIA80034.1|;gi|678223553|gb|AIM50693.1|	98.68	100	152	2	0	1	152	1	152	5e-109	311	site-specific RNA endonuclease [Escherichia phage vB_EcoM_JS09]
ORF188	gi|32453600|ref|NP_861806.1|;gi|19584258|emb|CAD28417.1|;gi|31790461|emb|CAD35395.1|;gi|32350419|gb|AAP76018.1|;gi|815007394|gb|AKE45171.1|;gi|815008101|gb|AKE45875.1|;gi|815009100|gb|AKE46867.1|	98.68	99.34	152	2	0	1	152	1	152	7e-109	311	RegB site-specific RNA endonuclease [Enterobacteria phage RB69]
ORF188	gi|730985179|ref|YP_009111264.1|;gi|670141322|gb|AII27733.1|	98.03	99.34	152	3	0	1	152	1	152	5e-108	309	site-specific RNA endonuclease [Escherichia phage Av-05]
ORF188	gi|682124384|ref|YP_009056696.1|;gi|604671819|gb|AHV82813.1|	98.03	98.68	152	3	0	1	152	1	152	5e-108	309	site-specific RNA endonuclease [Escherichia phage vB_EcoM_PhAPEC2]
ORF188	gi|55580948|emb|CAE54833.1|;gi|55580951|emb|CAE54835.1|	76.82	89.4	151	35	0	1	151	1	151	3e-85	251	endoribonuclease, RegB protein [Enterobacteria phage LZ9]
ORF188	gi|414086481|ref|YP_006986670.1|;gi|27524967|emb|CAD32714.1|;gi|55580927|emb|CAE54819.1|;gi|55580933|emb|CAE54823.1|;gi|55580936|emb|CAE54825.1|;gi|55580939|emb|CAE54827.1|;gi|55580942|emb|CAE54829.1|;gi|291290332|dbj|BAI83127.1|;gi|383396262|gb|AFH20078.1|;gi|398313666|emb|CCI89013.1|	76.82	89.4	151	35	0	1	151	1	151	4e-85	251	site-specific RNA endonuclease [Enterobacteria phage vB_EcoM_ACG-C40]
ORF188	gi|116326338|ref|YP_803058.1|;gi|330858638|ref|YP_004415013.1|;gi|422934534|ref|YP_007004495.1|;gi|422934901|ref|YP_007004861.1|;gi|730984845|ref|YP_009110938.1|;gi|27524952|emb|CAD32704.1|;gi|27524955|emb|CAD32706.1|;gi|27524958|emb|CAD32708.1|;gi|27524961|emb|CAD32710.1|;gi|55580930|emb|CAE54821.1|;gi|55580945|emb|CAE54831.1|;gi|55580960|emb|CAE54841.1|;gi|55580963|emb|CAE54843.1|;gi|55580969|e…	76.82	89.4	151	35	0	1	151	1	151	4e-85	251	site-specific RNase [Enterobacteria phage RB32]
ORF188	gi|9632821|ref|NP_049726.1|;gi|228861052|ref|YP_002854075.1|;gi|228861434|ref|YP_002854455.1|;gi|713322709|ref|YP_009102324.1|;gi|132272|sp|P13312.1|REGB_BPT4;gi|5354445|gb|AAD42652.1|AF158101_239;gi|15280|emb|CAA28227.1|;gi|27524964|emb|CAD32712.1|;gi|27524979|emb|CAD32722.1|;gi|27524988|emb|CAD32728.1|;gi|27524991|emb|CAD32730.1|;gi|55580924|emb|CAE54817.1|;gi|55580966|emb|CAE54845.1|;gi|555809…	76.82	89.4	151	35	0	1	151	1	151	5e-85	251	RegB site-specific RNA endonuclease [Enterobacteria phage T4]
ORF188	gi|639438768|ref|YP_009030725.1|;gi|628971596|gb|AHY83318.1|	76.82	89.4	151	35	0	1	151	1	151	6e-85	251	site-specific RNA endonuclease [Escherichia phage e11/2]
ORF188	gi|27524949|emb|CAD32702.1|	76.16	89.4	151	36	0	1	151	1	151	6e-85	250	endoribonuclease [Enterobacteria phage T2]
ORF189	gi|32453599|ref|NP_861805.1|;gi|682124383|ref|YP_009056695.1|;gi|730985180|ref|YP_009111265.1|;gi|32350418|gb|AAP76017.1|;gi|604671818|gb|AHV82812.1|;gi|670141323|gb|AII27734.1|;gi|815007395|gb|AKE45172.1|;gi|815008100|gb|AKE45874.1|;gi|815009099|gb|AKE46866.1|	100	100	180	0	0	1	180	1	180	2e-130	368	Vs.1 conserved hypothetical protein [Enterobacteria phage RB69]
ORF189	gi|642905861|ref|YP_009037391.1|;gi|642904015|gb|AIA80035.1|	99.44	99.44	180	1	0	1	180	1	180	8e-130	367	hypothetical protein JS09_068 [Escherichia phage vB_EcoM_JS09]
ORF189	gi|725949916|ref|YP_009100652.1|;gi|678223552|gb|AIM50692.1|	98.33	100	180	3	0	1	180	1	180	4e-129	365	hypothetical protein [Shigella phage Shf125875]
ORF189	gi|730984844|ref|YP_009110937.1|;gi|587757231|gb|AHK10964.1|;gi|694817557|gb|AIS73439.1|	83.71	92.13	178	29	0	1	178	1	178	1e-109	315	hypothetical protein pSs1_00129 [Shigella phage pSs-1]
ORF189	gi|422934533|ref|YP_007004494.1|;gi|339791316|gb|AEK12373.1|	83.15	91.57	178	30	0	1	178	1	178	5e-109	314	conserved hypothetical protein [Enterobacteria phage ime09]
ORF189	gi|9632841|ref|NP_049725.1|;gi|116326337|ref|YP_803057.1|;gi|228861051|ref|YP_002854074.1|;gi|228861433|ref|YP_002854454.1|;gi|330858637|ref|YP_004415012.1|;gi|422934900|ref|YP_007004860.1|;gi|639438767|ref|YP_009030724.1|;gi|712914951|ref|YP_009102588.1|;gi|713322420|ref|YP_009098504.1|;gi|713322708|ref|YP_009102323.1|;gi|140100|sp|P13311.1|Y06E_BPT4;gi|5354465|gb|AAD42672.1|AF158101_259;gi|1528…	83.15	91.57	178	30	0	1	178	1	178	6e-109	314	Vs.1 conserved hypothetical protein [Enterobacteria phage T4]
ORF189	gi|525334383|gb|AGR46065.1|	82.58	91.57	178	31	0	1	178	1	178	1e-108	313	hypothetical protein [Yersinia phage PST]
ORF189	gi|414086480|ref|YP_006986669.1|;gi|383396261|gb|AFH20077.1|	83.05	91.53	177	30	0	1	177	1	177	4e-108	311	hypothetical protein ACG-C40_0115 [Enterobacteria phage vB_EcoM_ACG-C40]
ORF189	gi|456351201|ref|YP_007501153.1|;gi|347466284|gb|AEO97070.1|;gi|408387051|gb|AFU64060.1|	69.44	82.22	180	54	1	1	179	1	180	2e-85	254	hypothetical protein [Salmonella phage S16]
ORF189	gi|764161908|ref|YP_009126318.1|;gi|586881545|gb|AHJ86965.1|	69.44	81.67	180	54	1	1	179	1	180	7e-85	253	hypothetical protein D26_00184 [Salmonella phage STP4-a]
ORF190	gi|32453598|ref|NP_861804.1|;gi|32350417|gb|AAP76016.1|	99.13	99.13	115	1	0	1	115	1	115	1e-79	234	Vs valyl-tRNA synthetase modifier [Enterobacteria phage RB69]
ORF190	gi|725949915|ref|YP_009100651.1|;gi|678223551|gb|AIM50691.1|	98.26	98.26	115	2	0	1	115	1	115	5e-79	233	valyl-tRNA synthetase modifier [Shigella phage Shf125875]
ORF190	gi|682124382|ref|YP_009056694.1|;gi|604671817|gb|AHV82811.1|	97.39	98.26	115	3	0	1	115	1	115	1e-78	231	putative Valyl-tRNA synthetase modifier [Escherichia phage vB_EcoM_PhAPEC2]
ORF190	gi|730985181|ref|YP_009111266.1|;gi|670141324|gb|AII27735.1|	96.52	97.39	115	4	0	1	115	1	115	1e-77	229	valyl-tRNA synthetase modifier [Escherichia phage Av-05]
ORF190	gi|587757230|gb|AHK10963.1|	71.43	87.5	112	31	1	1	112	1	111	8e-55	171	putative valyl-tRNA synthetase modifier [Escherichia phage HY01]
ORF190	gi|422934532|ref|YP_007004493.1|;gi|339791315|gb|AEK12372.1|	70.54	87.5	112	32	1	1	112	1	111	1e-54	170	valyl-tRNA synthetase modifier [Enterobacteria phage ime09]
ORF190	gi|228861050|ref|YP_002854073.1|;gi|414086479|ref|YP_006986668.1|;gi|639438766|ref|YP_009030723.1|;gi|227438724|gb|ACP31036.1|;gi|383396260|gb|AFH20076.1|;gi|398313664|emb|CCI89011.1|;gi|628971594|gb|AHY83316.1|;gi|698043257|gb|AIT75578.1|	69.64	87.5	112	33	1	1	112	1	111	8e-54	168	modifier of valyl-tRNA synthetase [Enterobacteria phage RB51]
ORF190	gi|422934899|ref|YP_007004859.1|;gi|343177453|gb|AEM00779.1|;gi|815008357|gb|AKE46130.1|	68.42	85.96	114	33	2	1	112	1	113	6e-52	164	valyl-tRNA synthetase modifier [Escherichia phage wV7]
ORF190	gi|330858636|ref|YP_004415011.1|;gi|327397570|gb|AEA73072.1|	67.54	85.09	114	34	2	1	112	1	113	6e-51	161	putative Vs modifier of valyl-tRNA synthetase [Shigella phage Shfl2]
ORF190	gi|9632840|ref|NP_049724.1|;gi|116326336|ref|YP_803056.1|;gi|712914950|ref|YP_009102587.1|;gi|713322419|ref|YP_009098503.1|;gi|713322707|ref|YP_009102322.1|;gi|730984843|ref|YP_009110936.1|;gi|140098|sp|P13310.1|VS_BPT4;gi|5354464|gb|AAD42671.1|AF158101_258;gi|15282|emb|CAA28229.1|;gi|115343929|gb|ABI94938.1|;gi|291290330|dbj|BAI83125.1|;gi|299780469|gb|ADJ39831.1|;gi|397134131|gb|AFO10638.1|;gi|…	67.54	85.09	114	34	2	1	112	1	113	7e-51	161	Vs valyl-tRNA synthetase modifier [Enterobacteria phage T4]
ORF191	gi|730985182|ref|YP_009111267.1|;gi|670141325|gb|AII27736.1|	98.71	99.35	155	2	0	1	155	1	155	3e-111	317	hypothetical protein Av05_00193 [Escherichia phage Av-05]
ORF191	gi|725949914|ref|YP_009100650.1|;gi|678223550|gb|AIM50690.1|	98.71	99.35	155	2	0	1	155	1	155	5e-111	317	hypothetical protein [Shigella phage Shf125875]
ORF191	gi|682124381|ref|YP_009056693.1|;gi|604671816|gb|AHV82810.1|	99.35	99.35	153	1	0	1	153	1	153	3e-110	315	hypothetical protein PhAPEC2_101 [Escherichia phage vB_EcoM_PhAPEC2]
ORF191	gi|642905862|ref|YP_009037392.1|;gi|642904016|gb|AIA80036.1|	98.06	98.71	155	3	0	1	155	1	155	8e-110	314	hypothetical protein JS09_069 [Escherichia phage vB_EcoM_JS09]
ORF191	gi|32453597|ref|NP_861803.1|;gi|32350416|gb|AAP76015.1|	98.69	98.69	153	2	0	1	153	1	153	2e-109	313	hypothetical protein RB69p113 [Enterobacteria phage RB69]
ORF191	gi|228861431|ref|YP_002854452.1|;gi|227438447|gb|ACP30760.1|	85.16	95.48	155	23	0	1	155	1	155	4e-99	287	tk.4 hypothetical protein [Enterobacteria phage RB14]
ORF191	gi|291290329|dbj|BAI83124.1|	85.81	94.19	155	22	0	1	155	1	155	2e-98	285	conserved hypothetical protein [Enterobacteria phage AR1]
ORF191	gi|9632836|ref|NP_049723.1|;gi|414086478|ref|YP_006986667.1|;gi|639438765|ref|YP_009030722.1|;gi|713322706|ref|YP_009102321.1|;gi|140097|sp|P13309.1|Y06D_BPT4;gi|5354460|gb|AAD42667.1|AF158101_254;gi|15283|emb|CAA28230.1|;gi|299780468|gb|ADJ39830.1|;gi|383396259|gb|AFH20075.1|;gi|628971593|gb|AHY83315.1|;gi|628971855|gb|AHY83576.1|;gi|628972050|gb|AHY83770.1|;gi|628972243|gb|AHY83962.1|;gi|698042…	85.16	94.84	155	23	0	1	155	1	155	2e-98	285	Tk.4 conserved hypothetical protein [Enterobacteria phage T4]
ORF191	gi|228861049|ref|YP_002854072.1|;gi|227438723|gb|ACP31035.1|;gi|698043256|gb|AIT75577.1|	85.16	94.19	155	23	0	1	155	1	155	7e-98	283	tk.4 hypothetical protein [Enterobacteria phage RB51]
ORF191	gi|116326335|ref|YP_803055.1|;gi|115343928|gb|ABI94937.1|;gi|698042429|gb|AIT74753.1|	84.52	93.55	155	24	0	1	155	1	155	2e-97	282	hypothetical protein RB32ORF113c [Enterobacteria phage RB32]
ORF192	gi|9632835|ref|NP_049722.1|;gi|228861430|ref|YP_002854451.1|;gi|639438764|ref|YP_009030721.1|;gi|642905863|ref|YP_009037393.1|;gi|713322705|ref|YP_009102320.1|;gi|140096|sp|P13308.1|Y06C_BPT4;gi|5354459|gb|AAD42666.1|AF158101_253;gi|15284|emb|CAA28231.1|;gi|227438446|gb|ACP30759.1|;gi|291290328|dbj|BAI83123.1|;gi|299780467|gb|ADJ39829.1|;gi|525334380|gb|AGR46062.1|;gi|628971592|gb|AHY83314.1|;gi|…	100	100	70	0	0	1	70	1	70	2e-47	149	Tk.2 conserved hypothetical protein [Enterobacteria phage T4]
ORF192	gi|116326334|ref|YP_803054.1|;gi|115343927|gb|ABI94936.1|;gi|698042428|gb|AIT74752.1|	98.57	98.57	70	1	0	1	70	1	70	1e-46	147	hypothetical protein RB32ORF112c [Enterobacteria phage RB32]
ORF192	gi|422934897|ref|YP_007004857.1|;gi|343177451|gb|AEM00777.1|;gi|815008355|gb|AKE46128.1|	98.57	98.57	70	1	0	1	70	1	70	2e-46	146	hypothetical phage protein [Escherichia phage wV7]
ORF192	gi|414086477|ref|YP_006986666.1|;gi|383396258|gb|AFH20074.1|	98.57	98.57	70	1	0	1	70	1	70	3e-46	145	hypothetical protein ACG-C40_0112 [Enterobacteria phage vB_EcoM_ACG-C40]
ORF192	gi|228861048|ref|YP_002854071.1|;gi|227438722|gb|ACP31034.1|;gi|398313662|emb|CCI89009.1|;gi|698043255|gb|AIT75576.1|	95.71	98.57	70	3	0	1	70	1	70	7e-46	145	tk.3 hypothetical protein [Enterobacteria phage RB51]
ORF192	gi|712914948|ref|YP_009102585.1|;gi|397134129|gb|AFO10636.1|	95.71	97.14	70	3	0	1	70	1	70	3e-45	143	hypothetical protein ECML134_110 [Escherichia phage ECML-134]
ORF192	gi|330858634|ref|YP_004415009.1|;gi|327397568|gb|AEA73070.1|	94.29	97.14	70	4	0	1	70	1	70	5e-45	142	hypothetical protein Tk.3 [Shigella phage Shfl2]
ORF192	gi|730984841|ref|YP_009110934.1|;gi|694817554|gb|AIS73436.1|	92.86	95.71	70	5	0	1	70	1	70	3e-44	140	hypothetical protein pSs1_00126 [Shigella phage pSs-1]
ORF192	gi|713322417|ref|YP_009098501.1|;gi|698040520|gb|AIT72851.1|;gi|698040793|gb|AIT73123.1|;gi|698041065|gb|AIT73394.1|;gi|698041337|gb|AIT73665.1|;gi|698041610|gb|AIT73937.1|;gi|698041884|gb|AIT74210.1|	92.86	95.71	70	5	0	1	70	1	70	8e-44	139	hypothetical protein RB3_115 [Enterobacteria phage RB3]
ORF192	gi|422934530|ref|YP_007004491.1|;gi|339791313|gb|AEK12370.1|	91.43	94.29	70	6	0	1	70	1	70	2e-43	139	conserved hypothetical protein [Enterobacteria phage ime09]
ORF193	gi|642905864|ref|YP_009037394.1|;gi|725949913|ref|YP_009100649.1|;gi|730985184|ref|YP_009111269.1|;gi|642904018|gb|AIA80038.1|;gi|670141327|gb|AII27738.1|;gi|678223549|gb|AIM50689.1|;gi|815007399|gb|AKE45176.1|;gi|815008096|gb|AKE45870.1|;gi|815009095|gb|AKE46862.1|	100	100	68	0	0	1	68	1	68	2e-45	143	hypothetical protein JS09_071 [Escherichia phage vB_EcoM_JS09]
ORF193	gi|730984840|ref|YP_009110933.1|;gi|694817553|gb|AIS73435.1|	91.18	92.65	68	6	0	1	68	3	70	3e-41	133	hypothetical protein pSs1_00125 [Shigella phage pSs-1]
ORF193	gi|639438763|ref|YP_009030720.1|;gi|628971591|gb|AHY83313.1|	89.71	92.65	68	7	0	1	68	3	70	1e-40	132	hypothetical protein e112_115 [Escherichia phage e11/2]
ORF193	gi|116326333|ref|YP_803053.1|;gi|713322416|ref|YP_009098500.1|;gi|713322704|ref|YP_009102319.1|;gi|115343926|gb|ABI94935.1|;gi|291290327|dbj|BAI83122.1|;gi|698040519|gb|AIT72850.1|;gi|698040792|gb|AIT73122.1|;gi|698041064|gb|AIT73393.1|;gi|698041336|gb|AIT73664.1|;gi|698041609|gb|AIT73936.1|;gi|698041883|gb|AIT74209.1|;gi|698042156|gb|AIT74481.1|;gi|698042427|gb|AIT74751.1|	89.71	92.65	68	7	0	1	68	3	70	1e-40	131	hypothetical protein RB32ORF111c [Enterobacteria phage RB32]
ORF193	gi|228861047|ref|YP_002854070.1|;gi|228861429|ref|YP_002854450.1|;gi|330858633|ref|YP_004415008.1|;gi|414086476|ref|YP_006986665.1|;gi|422934896|ref|YP_007004856.1|;gi|712914947|ref|YP_009102584.1|;gi|227438445|gb|ACP30758.1|;gi|227438721|gb|ACP31033.1|;gi|327397567|gb|AEA73069.1|;gi|343177450|gb|AEM00776.1|;gi|383396257|gb|AFH20073.1|;gi|397134128|gb|AFO10635.1|;gi|398313661|emb|CCI89008.1|;gi|5…	89.71	92.65	68	7	0	1	68	1	68	2e-40	131	RB32ORF111c hypothetical protein [Enterobacteria phage RB51]
ORF193	gi|729030412|gb|AIZ02166.1|	83.82	86.76	68	11	0	1	68	1	68	7e-38	124	hypothetical protein VR20_108 [Enterobacteria phage vB_EcoM_VR20]
ORF193	gi|238695256|ref|YP_002922449.1|;gi|220029392|gb|ACL78326.1|	75	85.29	68	17	0	1	68	3	70	8e-33	111	hypothetical protein EpJS10_0100 [Enterobacteria phage JS10]
ORF193	gi|308814462|ref|YP_003934736.1|;gi|308206054|gb|ADO19453.1|	73.53	85.29	68	18	0	1	68	1	68	3e-32	110	hypothetical protein SP18_gp111 [Shigella phage SP18]
ORF193	gi|161622441|ref|YP_001595231.1|;gi|160213747|gb|ABX11086.1|	73.53	83.82	68	18	0	1	68	3	70	9e-32	108	hypothetical protein EpJS98_gp102 [Enterobacteria phage JS98]
ORF193	gi|764161905|ref|YP_009126315.1|;gi|586881542|gb|AHJ86962.1|	47.14	62.86	70	29	2	3	67	5	71	1e-14	64.7	hypothetical protein D26_00181 [Salmonella phage STP4-a]
ORF194	gi|682124380|ref|YP_009056692.1|;gi|725949912|ref|YP_009100648.1|;gi|730985185|ref|YP_009111270.1|;gi|604671815|gb|AHV82809.1|;gi|670141328|gb|AII27739.1|;gi|678223548|gb|AIM50688.1|	98.33	100	60	1	0	1	60	1	60	2e-35	117	hypothetical protein PhAPEC2_100 [Escherichia phage vB_EcoM_PhAPEC2]
ORF194	gi|642905865|ref|YP_009037395.1|;gi|642904019|gb|AIA80039.1|	96.67	96.67	60	2	0	1	60	1	60	3e-34	114	hypothetical protein JS09_072 [Escherichia phage vB_EcoM_JS09]
ORF194	gi|32453596|ref|NP_861802.1|;gi|32350415|gb|AAP76014.1|	95	96.67	60	3	0	1	60	1	60	5e-34	114	Tk.2 conserved hypothetical protein [Enterobacteria phage RB69]
ORF194	gi|314121677|ref|YP_004063796.1|;gi|313151434|gb|ADR32490.1|;gi|729030138|gb|AIZ01893.1|;gi|729030995|gb|AIZ02747.1|	55	76.67	60	27	0	1	60	1	60	5e-18	73.2	Tk.2 conserved hypothetical protein [Enterobacteria phage vB_EcoM-VR7]
ORF194	gi|729030704|gb|AIZ02457.1|	50	76.67	60	30	0	1	60	1	60	4e-17	70.5	hypothetical protein VR25_113 [Enterobacteria phage vB_EcoM_VR25]
ORF194	gi|587757225|gb|AHK10958.1|	59.02	73.77	61	24	1	1	60	1	61	8e-17	70.1	hypothetical protein HY01_0101 [Escherichia phage HY01]
ORF194	gi|228861045|ref|YP_002854068.1|;gi|330858631|ref|YP_004415006.1|;gi|414086474|ref|YP_006986663.1|;gi|713322414|ref|YP_009098498.1|;gi|227438719|gb|ACP31031.1|;gi|327397565|gb|AEA73067.1|;gi|383396255|gb|AFH20071.1|;gi|698040517|gb|AIT72848.1|;gi|698040790|gb|AIT73120.1|;gi|698041062|gb|AIT73391.1|;gi|698041334|gb|AIT73662.1|;gi|698041607|gb|AIT73934.1|;gi|698041881|gb|AIT74207.1|;gi|698043252|gb…	57.38	72.13	61	25	1	1	60	1	61	3e-16	68.6	tk.2 hypothetical protein [Enterobacteria phage RB51]
ORF194	gi|291290325|dbj|BAI83120.1|	57.38	72.13	61	25	1	1	60	1	61	5e-16	67.8	conserved hypothetical protein [Enterobacteria phage AR1]
ORF194	gi|422934034|ref|YP_007004070.1|;gi|345450543|gb|AEN93746.1|	59.02	67.21	61	24	1	1	60	3	63	5e-16	67.8	conserved hypothetical protein [Enterobacteria phage Bp7]
ORF194	gi|712914945|ref|YP_009102582.1|;gi|397134126|gb|AFO10633.1|	55.74	72.13	61	26	1	1	60	1	61	1e-15	67	hypothetical protein ECML134_107 [Escherichia phage ECML-134]
ORF195	gi|32453595|ref|NP_861801.1|;gi|642905866|ref|YP_009037396.1|;gi|682124379|ref|YP_009056691.1|;gi|730985186|ref|YP_009111271.1|;gi|32350414|gb|AAP76013.1|;gi|604671814|gb|AHV82808.1|;gi|642904020|gb|AIA80040.1|;gi|670141329|gb|AII27740.1|	100	100	193	0	0	1	193	1	193	4e-143	401	Tk thymidine kinase [Enterobacteria phage RB69]
ORF195	gi|725949911|ref|YP_009100647.1|;gi|678223547|gb|AIM50687.1|	99.48	99.48	193	1	0	1	193	1	193	3e-142	399	thymidine kinase [Shigella phage Shf125875]
ORF195	gi|422934528|ref|YP_007004489.1|;gi|730984836|ref|YP_009110929.1|;gi|339791311|gb|AEK12368.1|;gi|587757224|gb|AHK10957.1|;gi|694817549|gb|AIS73431.1|	82.38	89.64	193	33	1	1	193	1	192	1e-115	332	thymidine kinase [Enterobacteria phage ime09]
ORF195	gi|422934892|ref|YP_007004852.1|;gi|639438759|ref|YP_009030716.1|;gi|343177446|gb|AEM00772.1|;gi|628971587|gb|AHY83309.1|;gi|815008350|gb|AKE46123.1|	82.38	89.12	193	33	1	1	193	1	192	2e-115	331	thymidine kinase [Escherichia phage wV7]
ORF195	gi|712914944|ref|YP_009102581.1|;gi|397134125|gb|AFO10632.1|	81.87	89.64	193	34	1	1	193	1	192	5e-115	330	Thymidine kinase [Escherichia phage ECML-134]
ORF195	gi|116326329|ref|YP_803049.1|;gi|228861044|ref|YP_002854067.1|;gi|228861425|ref|YP_002854446.1|;gi|330858630|ref|YP_004415005.1|;gi|414086473|ref|YP_006986662.1|;gi|713322413|ref|YP_009098497.1|;gi|713322700|ref|YP_009102315.1|;gi|115343922|gb|ABI94931.1|;gi|227438441|gb|ACP30754.1|;gi|227438718|gb|ACP31030.1|;gi|291290324|dbj|BAI83119.1|;gi|299780464|gb|ADJ39826.1|;gi|327397564|gb|AEA73066.1|;gi…	81.87	89.12	193	34	1	1	193	1	192	6e-115	330	thymidine kinase [Enterobacteria phage RB32]
ORF195	gi|9632832|ref|NP_049719.1|;gi|125425|sp|P13300.1|KITH_BPT4;gi|5354456|gb|AAD42663.1|AF158101_250;gi|15287|emb|CAA28234.1|;gi|628972223|gb|AHY83942.1|	81.35	88.6	193	35	1	1	193	1	192	5e-114	328	Tk thymidine kinase [Enterobacteria phage T4]
ORF195	gi|408387045|gb|AFU64054.1|	71.88	86.46	192	54	0	1	192	1	192	5e-107	310	thymidine kinase [Salmonella phage STML-198]
ORF195	gi|456351194|ref|YP_007501146.1|;gi|764161902|ref|YP_009126312.1|;gi|347466281|gb|AEO97067.1|;gi|586881539|gb|AHJ86959.1|	71.88	86.46	192	54	0	1	192	1	192	7e-107	309	thymidine kinase [Salmonella phage S16]
ORF195	gi|506564670|ref|WP_016031004.1|;gi|311993109|ref|YP_004009975.1|;gi|284177947|gb|ADB81613.1|	72.92	84.38	192	52	0	1	192	1	192	1e-105	306	thymidine kinase [Enterobacteria phage CC31]
ORF196	gi|642905867|ref|YP_009037397.1|;gi|642904021|gb|AIA80041.1|;gi|815007402|gb|AKE45179.1|;gi|815008093|gb|AKE45867.1|;gi|815009092|gb|AKE46859.1|	100	100	70	0	0	1	70	1	70	4e-44	140	hypothetical protein JS09_074 [Escherichia phage vB_EcoM_JS09]
ORF196	gi|410492047|ref|YP_006907234.1|;gi|407437636|gb|AFU20396.1|	98.57	100	70	1	0	1	70	1	70	1e-43	139	hypothetical protein HX01_064 [Enterobacteria phage HX01]
ORF196	gi|32453594|ref|NP_861800.1|;gi|682124378|ref|YP_009056690.1|;gi|725949910|ref|YP_009100646.1|;gi|730985187|ref|YP_009111272.1|;gi|32350413|gb|AAP76012.1|;gi|604671813|gb|AHV82807.1|;gi|670141330|gb|AII27741.1|;gi|678223546|gb|AIM50686.1|	98.57	98.57	70	1	0	1	70	1	70	2e-43	139	rI.1 conserved hypothetical protein [Enterobacteria phage RB69]
ORF196	gi|456351193|ref|YP_007501145.1|;gi|347466280|gb|AEO97066.1|;gi|408387044|gb|AFU64053.1|	75.36	86.96	69	17	0	1	69	1	69	1e-30	106	hypothetical protein [Salmonella phage S16]
ORF196	gi|506564664|ref|WP_016030998.1|;gi|311993103|ref|YP_004009969.1|;gi|589889839|ref|YP_009005375.1|;gi|284177941|gb|ADB81607.1|;gi|583927752|gb|AHI61014.1|	60.87	82.61	69	27	0	1	69	1	69	2e-24	90.5	hypothetical protein CC31p111 [Enterobacteria phage CC31]
ORF196	gi|398313657|emb|CCI89004.1|	63.77	72.46	69	25	0	1	69	1	69	2e-22	85.1	protein of unknown function [Yersinia phage phiD1]
ORF196	gi|9632768|ref|NP_049718.1|;gi|116326328|ref|YP_803048.1|;gi|228861043|ref|YP_002854066.1|;gi|228861424|ref|YP_002854445.1|;gi|330858629|ref|YP_004415004.1|;gi|414086472|ref|YP_006986661.1|;gi|422934527|ref|YP_007004488.1|;gi|422934891|ref|YP_007004851.1|;gi|639438758|ref|YP_009030715.1|;gi|712914943|ref|YP_009102580.1|;gi|713322412|ref|YP_009098496.1|;gi|713322699|ref|YP_009102314.1|;gi|73098483…	63.77	72.46	69	25	0	1	69	1	69	3e-22	84.7	rI.1 conserved hypothetical protein [Enterobacteria phage T4]
ORF196	gi|431809044|ref|YP_007235941.1|;gi|398313333|emb|CCI88682.1|;gi|746946493|gb|AJD81921.1|	60.29	76.47	68	27	0	1	68	1	68	9e-22	83.6	rI.1 conserved hypothetical protein [Yersinia phage phiR1-RT]
ORF196	gi|641468890|gb|AIA64994.1|	26.03	57.53	73	46	2	3	67	5	77	0.38	28.5	hypothetical protein S13_197 [Cronobacter phage S13]
ORF196	gi|11863102|ref|NP_071819.1|;gi|11692722|gb|AAG39958.1|AF301375_18	29.63	51.85	54	36	1	6	59	422	473	0.84	28.5	putative portal protein [Methanothermobacter phage psiM100]
ORF197	gi|730985188|ref|YP_009111273.1|;gi|670141331|gb|AII27742.1|	96	100	100	4	0	1	100	1	100	2e-68	204	rI lysis inhibition regulator [Escherichia phage Av-05]
ORF197	gi|682124377|ref|YP_009056689.1|;gi|604671812|gb|AHV82806.1|	94	98	100	6	0	1	100	1	100	2e-67	202	putative lysis inhibition regulator [Escherichia phage vB_EcoM_PhAPEC2]
ORF197	gi|642905868|ref|YP_009037398.1|;gi|642904022|gb|AIA80042.1|	97.83	100	92	2	0	9	100	1	92	3e-63	191	rI lysis inhibition regulator, membrane protein [Escherichia phage vB_EcoM_JS09]
ORF197	gi|32453593|ref|NP_861799.1|;gi|32350412|gb|AAP76011.1|	96.67	100	90	3	0	11	100	1	90	1e-61	187	rI lysis inhibition regulator, membrane protein [Enterobacteria phage RB69]
ORF197	gi|725949909|ref|YP_009100645.1|;gi|678223545|gb|AIM50685.1|	96.67	98.89	90	3	0	11	100	1	90	2e-61	186	lysis inhibition regulator [Shigella phage Shf125875]
ORF197	gi|330858628|ref|YP_004415003.1|;gi|327397562|gb|AEA73064.1|	55.67	73.2	97	40	2	1	96	1	95	6e-31	108	putative rI lysis inhibition protein [Shigella phage Shfl2]
ORF197	gi|525334375|gb|AGR46057.1|	54.64	72.16	97	41	2	1	96	1	95	2e-30	107	lysis inhibition regulator [Yersinia phage PST]
ORF197	gi|116326327|ref|YP_803047.1|;gi|228861423|ref|YP_002854444.1|;gi|115343920|gb|ABI94929.1|;gi|227438439|gb|ACP30752.1|;gi|698042421|gb|AIT74745.1|	53.12	71.88	96	44	1	1	96	1	95	2e-30	107	rI membrane protein [Enterobacteria phage RB32]
ORF197	gi|422934526|ref|YP_007004487.1|;gi|422934890|ref|YP_007004850.1|;gi|712914942|ref|YP_009102579.1|;gi|339791309|gb|AEK12366.1|;gi|343177444|gb|AEM00770.1|;gi|397134123|gb|AFO10630.1|;gi|587757222|gb|AHK10955.1|;gi|815008348|gb|AKE46121.1|	54.64	72.16	97	41	2	1	96	1	95	4e-30	107	rI lysis inhibition regulator membrane protein [Enterobacteria phage ime09]
ORF197	gi|228861042|ref|YP_002854065.1|;gi|713322411|ref|YP_009098495.1|;gi|713322698|ref|YP_009102313.1|;gi|227438716|gb|ACP31028.1|;gi|398313656|emb|CCI89003.1|;gi|698040514|gb|AIT72845.1|;gi|698040787|gb|AIT73117.1|;gi|698041059|gb|AIT73388.1|;gi|698041331|gb|AIT73659.1|;gi|698041604|gb|AIT73931.1|;gi|698041878|gb|AIT74204.1|;gi|698042150|gb|AIT74475.1|;gi|698043249|gb|AIT75570.1|	54.64	72.16	97	41	2	1	96	1	95	4e-30	106	rI membrane protein [Enterobacteria phage RB51]
ORF198	gi|682124376|ref|YP_009056688.1|;gi|604671811|gb|AHV82805.1|	100	100	59	0	0	1	59	1	59	2e-37	122	hypothetical protein PhAPEC2_96 [Escherichia phage vB_EcoM_PhAPEC2]
ORF198	gi|642905869|ref|YP_009037399.1|;gi|642904023|gb|AIA80043.1|	96.61	98.31	59	2	0	1	59	1	59	2e-36	120	hypothetical protein JS09_076 [Escherichia phage vB_EcoM_JS09]
ORF198	gi|32453592|ref|NP_861798.1|;gi|32350411|gb|AAP76010.1|	94.92	100	59	3	0	1	59	1	59	4e-36	119	MobD.2a conserved hypothetical protein [Enterobacteria phage RB69]
ORF198	gi|725949908|ref|YP_009100644.1|;gi|730985189|ref|YP_009111274.1|;gi|670141332|gb|AII27743.1|;gi|678223544|gb|AIM50684.1|	94.92	98.31	59	3	0	1	59	1	59	7e-36	118	hypothetical protein [Shigella phage Shf125875]
ORF198	gi|330858623|ref|YP_004414998.1|;gi|414086466|ref|YP_006986655.1|;gi|422934885|ref|YP_007004845.1|;gi|730984829|ref|YP_009110922.1|;gi|327397557|gb|AEA73059.1|;gi|343177439|gb|AEM00765.1|;gi|383396247|gb|AFH20063.1|;gi|694817542|gb|AIS73424.1|;gi|815008343|gb|AKE46116.1|	45.61	61.4	57	30	1	3	59	2	57	1e-06	43.1	hypothetical protein Shfl2p102 [Shigella phage Shfl2]
ORF198	gi|422934521|ref|YP_007004482.1|;gi|339791304|gb|AEK12361.1|	45.61	61.4	57	30	1	3	59	2	57	1e-06	43.1	hypothetical protein [Enterobacteria phage ime09]
ORF198	gi|228861418|ref|YP_002854439.1|;gi|639438752|ref|YP_009030709.1|;gi|227438434|gb|ACP30747.1|;gi|291290316|dbj|BAI83111.1|;gi|299780457|gb|ADJ39819.1|;gi|398313651|emb|CCI88998.1|;gi|628971580|gb|AHY83302.1|;gi|698042691|gb|AIT75014.1|;gi|698042964|gb|AIT75286.1|	45.61	61.4	57	30	1	3	59	2	57	1e-06	42.7	mobD.2a hypothetical protein [Enterobacteria phage RB14]
ORF198	gi|525334370|gb|AGR46052.1|	45.61	59.65	57	30	1	3	59	2	57	2e-06	42.7	hypothetical protein [Yersinia phage PST]
ORF198	gi|116326322|ref|YP_803042.1|;gi|115343915|gb|ABI94924.1|;gi|698042416|gb|AIT74740.1|	49.06	62.26	53	26	1	3	55	2	53	2e-06	42.4	hypothetical protein RB32ORF100c [Enterobacteria phage RB32]
ORF198	gi|713322694|ref|YP_009102309.1|;gi|698042146|gb|AIT74471.1|	45.61	61.4	57	30	1	3	59	2	57	2e-06	42.4	hypothetical protein RB27_104 [Enterobacteria phage RB27]
ORF199	gi|730985190|ref|YP_009111275.1|;gi|670141333|gb|AII27744.1|	95.59	95.59	68	3	0	1	68	1	68	2e-42	136	hypothetical protein Av05_00201 [Escherichia phage Av-05]
ORF199	gi|725949907|ref|YP_009100643.1|;gi|678223543|gb|AIM50683.1|	95.59	95.59	68	3	0	1	68	1	68	1e-41	134	hypothetical protein [Shigella phage Shf125875]
ORF199	gi|32453591|ref|NP_861797.1|;gi|32350410|gb|AAP76009.1|	91.18	94.12	68	6	0	1	68	1	68	8e-40	129	RB69ORF107c hypothetical protein [Enterobacteria phage RB69]
ORF199	gi|422934041|ref|YP_007004077.1|;gi|345450550|gb|AEN93753.1|	55.88	67.65	68	27	2	1	68	8	72	4e-15	66.2	hypothetical protein EpBp7_0036 [Enterobacteria phage Bp7]
ORF199	gi|238695248|ref|YP_002922441.1|;gi|220029384|gb|ACL78318.1|	54.41	67.65	68	28	2	1	68	1	65	8e-15	65.1	hypothetical protein EpJS10_0092 [Enterobacteria phage JS10]
ORF199	gi|299779046|ref|YP_003734240.1|;gi|298105775|gb|ADI55419.1|	54.41	67.65	68	28	2	1	68	26	90	1e-14	65.5	unnamed protein product [Enterobacteria phage IME08]
ORF199	gi|161622433|ref|YP_001595223.1|;gi|160213739|gb|ABX11078.1|	52.94	67.65	68	29	2	1	68	1	65	2e-14	64.3	hypothetical protein EpJS98_gp094 [Enterobacteria phage JS98]
ORF199	gi|642905870|ref|YP_009037400.1|;gi|642904024|gb|AIA80044.1|	68.89	75.56	45	13	1	1	45	1	44	3e-12	58.2	hypothetical protein JS09_077 [Escherichia phage vB_EcoM_JS09]
ORF199	gi|682124375|ref|YP_009056687.1|;gi|604671810|gb|AHV82804.1|	64.44	73.33	45	15	1	1	45	1	44	1e-10	54.3	hypothetical protein PhAPEC2_95 [Escherichia phage vB_EcoM_PhAPEC2]
ORF199	gi|682124373|ref|YP_009056685.1|;gi|604671808|gb|AHV82802.1|	49.3	59.15	71	33	2	1	68	1	71	1e-10	53.9	hypothetical protein PhAPEC2_93 [Escherichia phage vB_EcoM_PhAPEC2]
ORF200	gi|682124372|ref|YP_009056684.1|;gi|604671807|gb|AHV82801.1|;gi|815007406|gb|AKE45183.1|;gi|815008089|gb|AKE45863.1|;gi|815009088|gb|AKE46855.1|	100	100	36	0	0	1	36	1	36	7e-18	71.2	hypothetical protein PhAPEC2_92 [Escherichia phage vB_EcoM_PhAPEC2]
ORF200	gi|410492049|ref|YP_006907235.1|;gi|407437638|gb|AFU20398.1|	100	100	36	0	0	1	36	5	40	8e-18	71.2	hypothetical protein HX01_077 [Enterobacteria phage HX01]
ORF200	gi|642905873|ref|YP_009037403.1|;gi|642904027|gb|AIA80047.1|	94.44	97.22	36	2	0	1	36	1	36	7e-17	68.6	hypothetical protein JS09_080 [Escherichia phage vB_EcoM_JS09]
ORF200	gi|422934884|ref|YP_007004844.1|;gi|343177438|gb|AEM00764.1|;gi|815008342|gb|AKE46115.1|	64.71	88.24	34	12	0	1	34	1	34	2e-10	52	hypothetical protein [Escherichia phage wV7]
ORF200	gi|9632763|ref|NP_049712.1|;gi|731216|sp|P39239.1|Y05J_BPT4;gi|5354387|gb|AAD42594.1|AF158101_181;gi|1667559|gb|AAB26968.1|;gi|299780456|gb|ADJ39818.1|;gi|628971979|gb|AHY83700.1|;gi|628972168|gb|AHY83888.1|;gi|698042690|gb|AIT75013.1|;gi|698042963|gb|AIT75285.1|	64.71	88.24	34	12	0	1	34	1	34	3e-10	51.2	MobD.2 conserved hypothetical protein [Enterobacteria phage T4]
ORF200	gi|713322405|ref|YP_009098489.1|;gi|713322693|ref|YP_009102308.1|;gi|698040508|gb|AIT72839.1|;gi|698040781|gb|AIT73111.1|;gi|698041053|gb|AIT73382.1|;gi|698041325|gb|AIT73653.1|;gi|698041598|gb|AIT73925.1|;gi|698041872|gb|AIT74198.1|;gi|698042145|gb|AIT74470.1|	61.76	88.24	34	13	0	1	34	1	34	7e-10	50.4	hypothetical protein RB3_103 [Enterobacteria phage RB3]
ORF200	gi|116326321|ref|YP_803041.1|;gi|414086465|ref|YP_006986654.1|;gi|639438751|ref|YP_009030708.1|;gi|730984828|ref|YP_009110921.1|;gi|115343914|gb|ABI94923.1|;gi|383396246|gb|AFH20062.1|;gi|525334369|gb|AGR46051.1|;gi|628971579|gb|AHY83301.1|;gi|694817541|gb|AIS73423.1|;gi|698042415|gb|AIT74739.1|	61.76	88.24	34	13	0	1	34	1	34	7e-10	50.4	hypothetical protein RB32ORF099c [Enterobacteria phage RB32]
[truncated: 721 more rows]
